# Supplementary material for: The predicted RNA-binding protein regulome of axonal mRNAs
Source: HighWire-hosted journal article supplement (doi:10.1101/gr.277804.123), 2023-08-15
Supplement: Supplemental_Tables.zip [file Supplemental Table S1.xlsx]

## Sheet: Sheet1
Ensembl ID	GS	log2FC(NT3:NGF)	logCPM	PValue
ENSRNOT00000036823	Ell3	-7.8292618	-1.6566252	7.44E-11
ENSRNOT00000064506	LOC100909840	-3.9622006	6.57196341	1.86E-14
ENSRNOT00000024069	Irf8	-3.38614	-2.6513425	0.00042783
ENSRNOT00000075745	Apeg3	-2.7696198	-1.8861129	0.00036335
ENSRNOT00000037290	Bpifc	-2.4676036	-0.2606216	0.00015038
ENSRNOT00000048598	RGD1564606	-2.3229739	-1.8716776	0.00058699
ENSRNOT00000026897	Rom1	-2.2109858	1.17901053	0.00051132
ENSRNOT00000066265	Palld	-2.1589942	-1.3247572	0.00122275
ENSRNOT00000013119	Mmp10	-2.0641021	-1.3038686	0.00178865
ENSRNOT00000012408	Kcnk9	-2.0446798	-0.6050114	0.00012083
ENSRNOT00000047649	AABR06016865.1	-2.0090471	1.35347922	0.00017471
ENSRNOT00000073117	Lrrc10	-1.9960986	-1.5630701	0.00071866
ENSRNOT00000072624	Lrig1	-1.9832277	-0.8580105	0.00010278
ENSRNOT00000074804	Pdcd5	-1.927019	0.83446211	0.00206883
ENSRNOT00000073970	Sstr1	-1.9047415	4.22728827	9.14E-11
ENSRNOT00000002137	LOC100363136	-1.9029121	0.01472705	0.0001745
ENSRNOT00000027656	Ins2	-1.8794701	-1.170563	0.0007125
ENSRNOT00000010172	Gabrr1	-1.8386276	0.30256077	0.00209404
ENSRNOT00000001008	Mog	-1.6554555	-0.4179392	0.00211376
ENSRNOT00000044407	LOC688980	-1.6458559	-0.0063085	0.00053329
ENSRNOT00000022880	Gabrq	-1.6021574	2.75668426	1.63E-06
ENSRNOT00000063840	Pkd1l3	-1.5959085	0.65367264	0.00116569
ENSRNOT00000030119	Eya2	-1.5929554	-0.7337259	0.00183
ENSRNOT00000071264	LOC100912892	-1.5894013	4.26172076	1.40E-08
ENSRNOT00000016419	Cdh16	-1.5634589	0.73960451	0.00017781
ENSRNOT00000005067	Nptx1	-1.5022045	6.14334837	1.24E-06
ENSRNOT00000021432	Vil1	-1.4894936	0.94428239	0.00058739
ENSRNOT00000025362	Pmaip1	-1.4810551	2.59218901	3.39E-05
ENSRNOT00000001418	Cers4	-1.4769015	3.91464961	1.92E-08
ENSRNOT00000054939	Slc16a3	-1.453598	1.8317137	0.00228027
ENSRNOT00000008813	Hk2	-1.4489168	2.81809538	0.00035446
ENSRNOT00000073145	Wbscr17	-1.4298082	3.02713341	3.03E-05
ENSRNOT00000025372	Slc16a11	-1.4136248	2.8332043	1.22E-05
ENSRNOT00000018447	Scd1	-1.4105236	7.5598106	0.0013681
ENSRNOT00000033408	Acat2	-1.4099307	0.32799208	0.00064912
ENSRNOT00000020780	Cep72	-1.355415	3.48435031	0.00011328
ENSRNOT00000026290	Hsd3b5	-1.3542193	0.12945272	0.00154277
ENSRNOT00000040303	Zswim2	-1.3483418	4.51092666	8.21E-06
ENSRNOT00000056937	Fam46a	-1.3348711	2.95164615	1.37E-05
ENSRNOT00000005866	Cbln4	-1.3344677	-0.3309125	0.00263397
ENSRNOT00000066932	Scn5a	-1.3318458	2.4452253	8.72E-05
ENSRNOT00000031973	Peg12	-1.3216163	0.83439479	0.00198216
ENSRNOT00000061033	Epha7	-1.3139171	0.49630416	0.00095538
ENSRNOT00000072286	LOC680097	-1.3084979	2.12195169	0.00016708
ENSRNOT00000048963	LOC680353	-1.3079031	3.09823374	0.00096684
ENSRNOT00000018718	Hey2	-1.2958903	2.09996307	0.00013508
ENSRNOT00000026525	Eaf1	-1.2821418	9.35158866	0.00154946
ENSRNOT00000001849	Gpc2	-1.27606	0.742988	0.00095053
ENSRNOT00000067311	Fgd3	-1.2713305	0.14553372	0.00203878
ENSRNOT00000019384	Neto1	-1.2696811	1.31190745	0.00039871
ENSRNOT00000070993	Rab11fip1	-1.2606632	0.54082926	0.00249329
ENSRNOT00000047765	LOC100909581	-1.2437407	5.00631381	1.03E-06
ENSRNOT00000065946	Nrg3	-1.2286752	0.62282583	0.00192896
ENSRNOT00000028904	Bmp2	-1.2215157	4.62439389	2.08E-06
ENSRNOT00000021569	Fzd7	-1.2144387	2.25092318	0.00113807
ENSRNOT00000012773	Ndst4	-1.1992832	2.60864867	0.00226242
ENSRNOT00000047439	RT1-T24-4	-1.196166	2.66041704	0.0022027
ENSRNOT00000011892	Penk	-1.175533	0.98216669	0.00177456
ENSRNOT00000023078	Ppp5c	-1.1612973	3.80384396	1.22E-05
ENSRNOT00000006897	Vstm2a	-1.158641	1.91556999	0.00055622
ENSRNOT00000074170	Plac1	-1.1402865	2.83830423	0.00018656
ENSRNOT00000016100	Rnf128	-1.1362611	4.56682162	4.87E-05
ENSRNOT00000005212	Thsd7b	-1.116758	2.44631067	0.00062233
ENSRNOT00000007698	Gadd45a	-1.11329	7.41831188	1.59E-08
ENSRNOT00000013803	Aqp3	-1.0795464	1.4980504	0.00214851
ENSRNOT00000035846	Rbm46	-1.0774552	3.46782945	0.0005913
ENSRNOT00000009581	Slc3a1	-1.0610317	3.86801439	0.00027055
ENSRNOT00000056870	LOC100913000	-1.0416405	4.10004699	0.00037236
ENSRNOT00000013265	Topbp1	-1.0393395	3.8828896	0.00037334
ENSRNOT00000052270	RT1-A2	-1.0373709	2.04376716	0.00207256
ENSRNOT00000067009	LOC100910646	-1.0249725	4.54320234	3.45E-05
ENSRNOT00000012121	Chrac1	-1.0184623	6.88987067	1.16E-06
ENSRNOT00000029431	Cep76	-1.0130564	3.69417909	0.00228633
ENSRNOT00000048221	Nae1	-0.9901224	4.25588826	0.00012211
ENSRNOT00000017813	Nab1	-0.9863001	5.51130201	4.46E-06
ENSRNOT00000010365	Sep.09	-0.9521797	2.65199418	0.0026334
ENSRNOT00000013496	Ldlr	-0.941882	8.02745652	1.57E-06
ENSRNOT00000030588	Lrrtm4	-0.9402764	2.87976615	0.0016181
ENSRNOT00000026009	Cpeb1	-0.9376954	7.71926946	2.34E-07
ENSRNOT00000051757	Tbc1d8b	-0.9334667	2.65803314	0.00273304
ENSRNOT00000027392	RGD1305592	-0.9311605	4.75465678	0.00295897
ENSRNOT00000006963	Acvr1	-0.9190019	3.68557708	0.00074398
ENSRNOT00000045504	LOC685520	-0.9182369	6.06134627	9.58E-06
ENSRNOT00000015145	Nhsl1	-0.9181545	3.1166109	0.00192453
ENSRNOT00000058640	RGD1563668	-0.9145264	3.71192349	0.00077567
ENSRNOT00000036287	Zfp367	-0.9132815	3.36245668	0.00105634
ENSRNOT00000016265	Snx10	-0.9055904	8.25073808	1.25E-06
ENSRNOT00000021612	Cdh17	-0.9025423	4.29935719	0.00050457
ENSRNOT00000021764	B4galt6	-0.9020629	6.01569109	1.34E-05
ENSRNOT00000015142	Lonrf1	-0.8985349	5.54856801	0.00014415
ENSRNOT00000020728	Stc1	-0.8962213	4.17606117	0.00073672
ENSRNOT00000028550	Usf2	-0.8959677	4.00591971	0.00124422
ENSRNOT00000000223	RGD1565766	-0.8950444	6.1546841	5.40E-06
ENSRNOT00000076964	Acbd5	-0.8932834	4.21264007	0.00040967
ENSRNOT00000024707	Sfxn1	-0.8883455	8.08521962	3.60E-07
ENSRNOT00000045362	RGD1565536	-0.8820918	3.33114982	0.00219138
ENSRNOT00000010551	Pigm	-0.8814386	3.21580062	0.00198512
ENSRNOT00000060476	Tmem229a	-0.8788405	4.26111579	0.00052002
ENSRNOT00000066913	Imp4	-0.8784424	5.33015565	6.77E-05
ENSRNOT00000013817	Slc25a13	-0.8660661	3.91767567	0.00091182
ENSRNOT00000071150	LOC100910957	-0.8542324	3.55469535	0.00188028
ENSRNOT00000050061	Usp22	-0.8499898	5.45883194	5.30E-05
ENSRNOT00000005089	Mrps7	-0.8465885	4.23791199	0.001024
ENSRNOT00000001438	Kdelr2	-0.8415635	4.02052497	0.00113654
ENSRNOT00000051611	Kcnd2	-0.8405815	4.08154412	0.00241758
ENSRNOT00000011466	Dact1	-0.8375743	4.5552605	0.00065702
ENSRNOT00000046053	AABR06087686.1	-0.8371029	7.06956266	4.32E-06
ENSRNOT00000003397	Gnl3l	-0.8302161	5.63169633	0.00027447
ENSRNOT00000026633	Cd9	-0.8281873	9.11461516	4.87E-06
ENSRNOT00000066279	Stx16	-0.8269903	4.00561375	0.00154047
ENSRNOT00000060996	Map3k2	-0.8257856	5.77836082	0.00114198
ENSRNOT00000016037	Perp	-0.8233089	6.76066777	4.28E-05
ENSRNOT00000059750	Spock3	-0.8225757	7.69508168	1.19E-05
ENSRNOT00000070897	P4ha1	-0.8222455	6.44635275	0.00022657
ENSRNOT00000044847	E2f5	-0.8199858	3.8219343	0.00212759
ENSRNOT00000021403	Nabp1	-0.8167059	5.00825842	0.00034604
ENSRNOT00000076106	Ptpn3	-0.8155994	4.63718509	0.00151494
ENSRNOT00000054920	Narf	-0.8117001	4.32253172	0.00294444
ENSRNOT00000005668	Lrp12	-0.8040604	6.02254838	6.50E-05
ENSRNOT00000009587	Tmx1	-0.8029698	9.78141931	5.16E-06
ENSRNOT00000017268	Erlin1	-0.8000649	4.49184995	0.00102175
ENSRNOT00000033677	Gnl3	-0.7984875	5.44426497	0.00019833
ENSRNOT00000068528	Rfx5	-0.7954313	5.1885006	0.0005287
ENSRNOT00000071902	Fstl5	-0.7842189	6.3072102	0.0003207
ENSRNOT00000007197	Csrnp3	-0.7833183	6.08969934	0.00014446
ENSRNOT00000043172	Acly	-0.7814895	6.95879501	0.00236131
ENSRNOT00000025705	Fam89a	-0.7783591	4.88458699	0.0008908
ENSRNOT00000073218	Ptp4a1	-0.7744728	9.0434683	1.07E-05
ENSRNOT00000023554	Hmgcs1	-0.7724464	9.65314483	0.00018888
ENSRNOT00000005722	Deptor	-0.7682831	6.99574329	0.00022331
ENSRNOT00000021577	Etv3	-0.7654895	5.14284625	0.00146902
ENSRNOT00000042126	Bex2	-0.7629195	8.86035899	1.03E-05
ENSRNOT00000018952	Npy1r	-0.7581466	7.69441974	3.67E-05
ENSRNOT00000009233	Insig1	-0.7567507	7.52478413	0.00217022
ENSRNOT00000048996	LOC100912195	-0.7548218	8.04298607	3.99E-05
ENSRNOT00000063952	Slc35a2	-0.7543349	6.51812015	7.03E-05
ENSRNOT00000037844	Dusp6	-0.7537549	7.013493	0.00013117
ENSRNOT00000074317	Suz12	-0.7493987	7.69950232	0.00012777
ENSRNOT00000013963	Ccdc32	-0.7475497	4.69288937	0.00126815
ENSRNOT00000005349	Pi4k2b	-0.7420529	5.59322886	0.00067124
ENSRNOT00000031007	Ube2m	-0.7376666	4.30746509	0.00295662
ENSRNOT00000047750	RGD1560797	-0.7346704	4.58008022	0.00258156
ENSRNOT00000060568	Fam120a	-0.7342386	7.99053193	2.76E-05
ENSRNOT00000017211	Tm9sf2	-0.732003	7.36047252	0.00093722
ENSRNOT00000028744	Anp32e	-0.7313421	7.86732823	8.25E-05
ENSRNOT00000006752	Tspan13	-0.7308891	8.34820163	0.00010265
ENSRNOT00000021110	Ugcg	-0.7275234	6.4509292	0.0029711
ENSRNOT00000077002	Zfp449	-0.7253489	5.04338508	0.00222222
ENSRNOT00000024172	Wdr48	-0.7232761	5.35157417	0.00060951
ENSRNOT00000011306	Ss18l1	-0.7205482	7.35730037	9.84E-05
ENSRNOT00000071269	Vma21	-0.7201305	7.2539874	0.00015192
ENSRNOT00000007351	Snrpf	-0.7175456	7.57223242	0.00057557
ENSRNOT00000048854	App	-0.7156645	11.0432529	4.15E-05
ENSRNOT00000000904	Chmp2b	-0.7108822	7.25189647	0.00025452
ENSRNOT00000016376	Cyfip1	-0.7099793	6.34072524	0.00076732
ENSRNOT00000005124	Scoc	-0.7099163	9.42649854	8.16E-05
ENSRNOT00000012720	Pgp	-0.7088578	7.37465202	0.00046486
ENSRNOT00000031623	Zfp133	-0.7050022	6.60395626	0.00021185
ENSRNOT00000039149	Tmem130	-0.7035575	8.6095969	0.00081235
ENSRNOT00000026303	Egr1	-0.701337	8.5413727	0.00130006
ENSRNOT00000014031	Lats2	-0.7003569	5.48287676	0.00195911
ENSRNOT00000003512	Rps6ka6	-0.6935872	5.97548877	0.00068954
ENSRNOT00000043461	Pim3	-0.6935133	5.94181962	0.00227585
ENSRNOT00000021535	Tm4sf1	-0.6916024	7.15518645	0.00087862
ENSRNOT00000068113	Trappc2	-0.6915522	7.22293049	0.00031753
ENSRNOT00000016846	Man1b1	-0.6898646	5.52286695	0.00097829
ENSRNOT00000000352	Cd24	-0.6875252	12.3057185	0.00010648
ENSRNOT00000005138	Atp6ap2	-0.687213	11.2705429	0.00011268
ENSRNOT00000001315	Arpc1b	-0.6872023	5.95656494	0.00189078
ENSRNOT00000072753	LOC100910723	-0.6854926	5.71571374	0.00130464
ENSRNOT00000043752	Ggct	-0.6850916	5.64350251	0.00095993
ENSRNOT00000050261	E2f3	-0.6849357	4.93204975	0.00296523
ENSRNOT00000002169	Cct8	-0.6822092	7.86995076	0.00033154
ENSRNOT00000068520	Cdc7	-0.6820643	5.2643592	0.00221641
ENSRNOT00000007367	Rbm3	-0.6778551	8.53433354	0.00075005
ENSRNOT00000022117	Galnt1	-0.6771143	5.4875553	0.00127572
ENSRNOT00000011797	Fam91a1	-0.6768165	8.21274398	0.0002547
ENSRNOT00000017276	Golph3	-0.6757966	9.05835017	8.65E-05
ENSRNOT00000011312	Lypla1	-0.6755956	6.21060935	0.00056248
ENSRNOT00000057404	Nalcn	-0.6689559	7.95274185	0.00023475
ENSRNOT00000012334	Col5a1	-0.6684636	5.9243682	0.00106295
ENSRNOT00000055607	Ap1ar	-0.6673991	6.83132081	0.00037588
ENSRNOT00000028260	Them4	-0.6671328	6.84415151	0.00128771
ENSRNOT00000021864	Camk2n1	-0.6659515	6.73690652	0.00075418
ENSRNOT00000020161	Acsl3	-0.6657518	7.1203081	0.00168982
ENSRNOT00000008477	Vdac1	-0.6650864	7.0898949	0.00217873
ENSRNOT00000017227	Stx12	-0.6641728	7.76472296	0.00021215
ENSRNOT00000020505	Cyp26b1	-0.6614524	6.11427715	0.00076292
ENSRNOT00000006063	Ublcp1	-0.6612872	7.32844327	0.00029276
ENSRNOT00000016740	Smarca2	-0.6603197	6.95305173	0.00086959
ENSRNOT00000030912	Tfap2b	-0.6600277	7.06647173	0.00025897
ENSRNOT00000018442	Kbtbd2	-0.6575967	7.39677061	0.00031522
ENSRNOT00000001562	Sppl3	-0.6574046	7.83849568	0.0004925
ENSRNOT00000018454	Sec61a1	-0.6497415	5.89170221	0.00142487
ENSRNOT00000002853	Slc35a5	-0.6494022	6.06554388	0.0012874
ENSRNOT00000002091	Gap43	-0.6479952	11.4554089	0.00051569
ENSRNOT00000021804	Polr3g	-0.6463517	6.68048111	0.00074142
ENSRNOT00000022389	Idi1	-0.645212	7.82989784	0.0027081
ENSRNOT00000031370	Stk32a	-0.6431073	7.20468657	0.00089032
ENSRNOT00000030491	Rfk	-0.6428868	9.70338609	0.00037368
ENSRNOT00000050513	Atf2	-0.63892	8.19763543	0.00029584
ENSRNOT00000007623	Arl1	-0.6381861	5.94344817	0.0021016
ENSRNOT00000014810	Bet1	-0.6371715	6.04105926	0.00219847
ENSRNOT00000065421	Clip4	-0.637058	6.62935078	0.00096527
ENSRNOT00000026580	Lamp1	-0.6357897	8.11339962	0.00024793
ENSRNOT00000011948	Socs2	-0.6357262	6.42947916	0.00086158
ENSRNOT00000070967	Ak4	-0.6356285	7.17924954	0.00068803
ENSRNOT00000025700	Pfkfb3	-0.6341161	6.67368379	0.00107317
ENSRNOT00000073892	Ddc	-0.6328138	11.5023541	0.00052311
ENSRNOT00000016084	RGD1307929	-0.6303358	7.19847556	0.00065883
ENSRNOT00000048998	Gabarapl2	-0.6293673	8.16084685	0.00079305
ENSRNOT00000013486	Ube2g1	-0.6291207	8.00259147	0.00037418
ENSRNOT00000006483	Arf2	-0.6283986	7.12553614	0.00050022
ENSRNOT00000075397	LOC100912469	-0.6283179	9.25756963	0.00155355
ENSRNOT00000016804	Zfp91	-0.6218463	7.70703871	0.00041649
ENSRNOT00000012675	Rnf114	-0.6211661	5.80671424	0.00190602
ENSRNOT00000043627	Map2	-0.6190772	7.49382912	0.00079377
ENSRNOT00000020390	Golga7b	-0.6106294	6.76872892	0.00075789
ENSRNOT00000012510	Dtd1	-0.6081478	8.95854852	0.0004811
ENSRNOT00000019213	Jag2	-0.6077693	6.13847251	0.00246167
ENSRNOT00000010073	Ndufaf4	-0.605152	6.27554791	0.00185572
ENSRNOT00000023825	AABR06055554.1	-0.6037498	9.51530788	0.00052379
ENSRNOT00000002484	Eif4a2	-0.6020624	9.92058781	0.00059381
ENSRNOT00000028760	Sv2a	-0.6017635	7.05666077	0.00133714
ENSRNOT00000001310	Pdap1	-0.6015678	6.08222376	0.00224405
ENSRNOT00000026057	Acsl4	-0.6012441	9.78876187	0.00054076
ENSRNOT00000017579	Metap1	-0.5989898	7.35927616	0.00129651
ENSRNOT00000015931	Atp6v1b2	-0.5951546	10.0883455	0.00081337
ENSRNOT00000074273	AABR06055555.1	-0.5946147	9.53889557	0.00065195
ENSRNOT00000026696	Hspa9	-0.5893596	8.67276008	0.00159787
ENSRNOT00000022564	Dner	-0.5877885	9.26589628	0.00164181
ENSRNOT00000075099	Sult4a1	-0.5875834	9.96044254	0.00090672
Table S1 : Up-regulated genes in NGF treated cells compared to NT-3. Columns represent: 1-Ensembl Rn5 transcript ID, 2- gene symbol, 3- difference in gene expression level between NT-3 and NGF (log2FC), 4- average gene count per millions across all samples (log), 5- adjusted (FDR) P-value.
