# Supplementary material for: The predicted RNA-binding protein regulome of axonal mRNAs
Source: HighWire-hosted journal article supplement (doi:10.1101/gr.277804.123), 2023-08-15
Supplement: Supplemental_Tables.zip [file Supplemental Table S2.xlsx]

## Sheet: Sheet1
Ensembl ID	GS	log2FC(NT3:NGF)	logCPM	PValue
ENSRNOT00000022962	Rlbp1	8.86802912	-0.6310743	2.11E-16
ENSRNOT00000005399	Glipr1	8.0391449	-1.3817442	4.55E-10
ENSRNOT00000005352	Klhdc9	8.0127514	-1.410201	3.06E-12
ENSRNOT00000013474	Atxn7l4	5.58308086	3.26250243	1.71E-05
ENSRNOT00000001809	Hpd	4.26832951	-1.7827741	3.06E-07
ENSRNOT00000046211	AABR06041914.1	3.69368309	-2.238636	2.94E-05
ENSRNOT00000072490	LOC100910855	3.60342906	-2.3076835	4.05E-05
ENSRNOT00000009562	RGD1311251	2.85822587	-2.5728103	0.00150705
ENSRNOT00000046456	Mta1	2.74031377	4.78837952	0.00012161
ENSRNOT00000013515	Acot2	2.66411791	2.2031446	0.00105397
ENSRNOT00000068003	Mfsd4	2.66034045	-2.5256794	0.00140892
ENSRNOT00000076884	Taf9b	2.29723737	3.39480041	7.99E-05
ENSRNOT00000007523	Lmcd1	2.29020189	-1.4465988	0.00014315
ENSRNOT00000067720	LOC685727	2.15650109	-0.9317532	6.53E-05
ENSRNOT00000059735	Ccdc80	2.01186999	1.6586738	1.26E-07
ENSRNOT00000015227	Clspn	1.98855787	-1.6532641	0.00138448
ENSRNOT00000011378	Dcaf4	1.96226247	1.21215118	0.00143024
ENSRNOT00000016153	Grk4	1.93079391	-1.4072777	0.0018034
ENSRNOT00000008865	Cst7	1.8668079	-1.4215363	0.00122814
ENSRNOT00000071231	AABR06078905.1	1.66803359	7.19541206	6.43E-07
ENSRNOT00000042163	LOC100911824	1.62024891	-1.1054256	0.00248467
ENSRNOT00000025820	Ocstamp	1.60984529	-1.1752829	0.0029322
ENSRNOT00000072215	Gstz1	1.50456371	3.57482495	0.00237715
ENSRNOT00000026783	Ptrf	1.4921692	0.3206805	0.0005597
ENSRNOT00000023698	Mastl	1.44464277	0.02647953	0.00175793
ENSRNOT00000038551	Mical3	1.43897996	2.35818197	0.00030775
ENSRNOT00000036103	Shisa3	1.43183407	4.06055932	4.57E-05
ENSRNOT00000022176	Uvrag	1.42739483	-0.114578	0.00234223
ENSRNOT00000044865	Ptbp1	1.42396569	3.85941326	1.31E-07
ENSRNOT00000064638	Trub2	1.41964189	1.79959014	2.73E-05
ENSRNOT00000016859	Thsd1	1.37420187	0.3593988	0.00090629
ENSRNOT00000036162	Prr7	1.2957495	1.45093528	0.0004389
ENSRNOT00000057368	Cdk5r2	1.28611057	3.99173203	0.0001643
ENSRNOT00000022943	Calb2	1.2782797	4.68548059	6.82E-08
ENSRNOT00000074767	Shd	1.26383905	2.65957618	0.00235117
ENSRNOT00000012760	Pdk4	1.20943206	0.66968657	0.00276483
ENSRNOT00000001102	Ddr1	1.2076868	1.38332691	0.00077059
ENSRNOT00000049000	Tpm2	1.14017714	2.65042972	0.00057702
ENSRNOT00000007763	Eif2b4	1.13907025	1.30298716	0.002491
ENSRNOT00000056998	Pld2	1.1383126	2.67575818	0.00024703
ENSRNOT00000061047	Pcp4	1.10500262	3.64164155	0.00032381
ENSRNOT00000020216	Ifitm2	1.08899084	1.94967506	0.00099778
ENSRNOT00000007776	Cntrl	1.06839358	1.72077119	0.0016016
ENSRNOT00000026839	Samd4b	1.06047468	3.27500784	0.00018874
ENSRNOT00000059548	Phf1	1.05700004	2.22236631	0.00214337
ENSRNOT00000015206	Rpusd1	1.05524609	3.02106291	0.00025543
ENSRNOT00000029125	Mgll	1.04919458	4.13587928	0.00029751
ENSRNOT00000035125	Dact2	1.04689442	2.64812309	0.00121496
ENSRNOT00000028678	Rps6ka4	1.04318515	1.65734799	0.00208306
ENSRNOT00000061159	Pip5k1c	1.02869258	7.62024949	1.23E-07
ENSRNOT00000051097	Epb4.1	1.02468324	2.10987246	0.00177298
ENSRNOT00000007577	Mgp	0.99953532	4.98062357	0.00186818
ENSRNOT00000017490	Cacnb3	0.98776436	5.93864874	2.25E-06
ENSRNOT00000016588	Wash	0.97431789	4.6471872	5.44E-05
ENSRNOT00000066723	Setd5	0.97418013	4.03608863	0.00014158
ENSRNOT00000032252	Lrrc16b	0.96855217	4.16877197	0.00018749
ENSRNOT00000031371	Asap2	0.96746791	3.37829474	0.00190797
ENSRNOT00000001695	Col6a2	0.9642857	2.2546291	0.00258911
ENSRNOT00000039235	Szt2	0.95117362	2.74915761	0.00132897
ENSRNOT00000020123	Apba1	0.94869084	6.85992818	7.65E-07
ENSRNOT00000024840	Nt5dc2	0.9424313	3.44876764	0.00077166
ENSRNOT00000017486	Sparc	0.93529997	2.67727478	0.00168269
ENSRNOT00000064009	Ctnnd1	0.92556402	6.10336059	0.00110563
ENSRNOT00000063876	Gga1	0.90511468	3.59715525	0.00085256
ENSRNOT00000004780	Ephx1	0.86699542	3.94416253	0.00220943
ENSRNOT00000055321	Gdpd5	0.86314082	5.76342208	2.00E-05
ENSRNOT00000021048	Myl12a	0.83448823	5.78723024	8.02E-05
ENSRNOT00000012844	Lrrn2	0.83387274	5.84262788	9.94E-05
ENSRNOT00000004320	Lgals3bp	0.83071832	6.28297204	0.00010947
ENSRNOT00000006119	Esyt1	0.83013438	4.22065503	0.00165631
ENSRNOT00000022635	Slc12a7	0.8259074	5.22465649	0.00029152
ENSRNOT00000018225	INF2	0.81447665	5.70791028	0.0001402
ENSRNOT00000024900	Pde4dip	0.80466643	3.89592619	0.001653
ENSRNOT00000027073	Uba52	0.80425569	5.73399211	0.00066283
ENSRNOT00000020635	Rpl13	0.80355997	7.19107732	5.00E-05
ENSRNOT00000007246	Recql5	0.80013186	4.17779228	0.00182446
ENSRNOT00000067455	Sesn2	0.79704492	5.44671679	0.00110463
ENSRNOT00000037612	Vwa5b2	0.78764866	4.66914941	0.00182997
ENSRNOT00000030344	Rab5c	0.77985009	4.71530023	0.00119626
ENSRNOT00000001518	Rplp0	0.77860955	8.69136608	0.00012585
ENSRNOT00000072040	Mia3	0.76909311	6.30220217	0.00022845
ENSRNOT00000044768	Nacad	0.7689763	4.38095563	0.00279904
ENSRNOT00000068102	Dctn1	0.76510906	7.91508173	3.13E-05
ENSRNOT00000021734	Sh3bgrl3	0.7571048	6.63148508	0.00053169
ENSRNOT00000025392	Jph3	0.75191391	7.09570515	6.67E-05
ENSRNOT00000068452	Zfpm1	0.7417222	5.79680541	0.00022836
ENSRNOT00000008030	Nsg1	0.73172746	10.5201807	0.00170499
ENSRNOT00000071913	Atp5e	0.73141922	5.90269641	0.00114826
ENSRNOT00000006359	Rpl19	0.7287591	6.17775989	0.00111568
ENSRNOT00000002308	Setd4	0.71653665	4.75998026	0.00223239
ENSRNOT00000074783	Lrrc75b	0.71515824	5.73156204	0.00042667
ENSRNOT00000022276	Plcg1	0.7105943	7.54207827	7.97E-05
ENSRNOT00000025221	Pprc1	0.70591106	5.44394977	0.00101285
ENSRNOT00000044483	Maged2	0.70245728	7.26260124	0.00016156
ENSRNOT00000025421	Rpl18a	0.69706543	6.43264126	0.00057674
ENSRNOT00000018697	Stmn3	0.68872665	10.0440828	8.15E-05
ENSRNOT00000012296	Ifi27	0.68558477	7.19088147	0.00190104
ENSRNOT00000003633	Abat	0.68200651	7.21262929	0.00086162
ENSRNOT00000076589	Tnr	0.67628644	7.05759885	0.0001947
ENSRNOT00000025784	Slc7a5	0.66153821	5.85992845	0.0020941
ENSRNOT00000036910	Nisch	0.64633514	8.5438943	0.00029179
ENSRNOT00000017599	Pcdh8	0.64242151	7.23253954	0.0003527
ENSRNOT00000058258	Ankrd11	0.6404859	6.28793862	0.00094986
ENSRNOT00000016987	Fam89b	0.63968473	6.96562013	0.00042761
ENSRNOT00000050549	Clcn3	0.63964899	7.12739895	0.0009641
ENSRNOT00000027047	Trim8	0.63562554	5.69890866	0.00216393
ENSRNOT00000002044	Napa	0.63552014	5.99381501	0.00149671
ENSRNOT00000017453	Postn	0.63261532	6.4866307	0.00132409
ENSRNOT00000015618	PSNRBP2	0.62684894	6.2888877	0.00204232
ENSRNOT00000014699	Ube2o	0.62634987	6.13336992	0.00191531
ENSRNOT00000043085	Tbc1d9b	0.62264909	7.27246885	0.00107845
ENSRNOT00000024430	Vim	0.62226426	6.90213999	0.00083835
ENSRNOT00000041961	Fhod3	0.61855062	7.00302111	0.00101846
ENSRNOT00000022467	Mlf2	0.61626382	6.38318403	0.00258291
ENSRNOT00000006815	Dtx3	0.61125683	6.51705414	0.00232472
ENSRNOT00000068745	Chn1	0.60849925	7.01170438	0.00221969
ENSRNOT00000026382	Ap4b1	0.60588037	6.43359056	0.00186568
ENSRNOT00000076052	Stmn1	0.60554579	10.929418	0.00071325
ENSRNOT00000059183	Rgs3	0.59568835	6.5194275	0.00246139
Table S2 : Up-regulated genes in NT-3 treated cells compared to NGF. Columns represent: 1-Ensembl Rn5 transcript ID, 2- gene symbol, 3- difference in gene expression level between NT-3 and NGF (log2FC), 4- average gene count per millions across all samples (log), 5- adjusted (FDR) P-value.
