# Supplementary material for: The predicted RNA-binding protein regulome of axonal mRNAs
Source: HighWire-hosted journal article supplement (doi:10.1101/gr.277804.123), 2023-08-15
Supplement: Supplemental_Tables.zip [file Supplemental Table S3.xlsx]

## Sheet: Sheet1
TFBS	NT3.PVal	NT3.frac.bg	NT3.frac.fg	NT3.enrichment	NGF.PVal	NGF.frac.bg	NGF.frac.fg	NGF.enrichment	NGF/NT3	NT3/NGF
EGR1..3.p2	2.50E-01	0.31	0.34	2022-01-01	3.46E-04	0.31	0.43	2022-04-01	2022-03-01	0.8
AHR_ARNT_ARNT2.p2	1.02E-01	0.23	0.29	2022-03-01	1.34E-03	0.23	0.33	2022-04-01	2022-01-01	0.9
ATF5_CREB3.p2	4.12E-01	0.18	0.2	2022-01-01	1.99E-03	0.18	0.28	2022-05-01	2022-04-01	0.7
NRF1.p2	9.47E-01	0.19	0.14	0.7	2.88E-03	0.19	0.28	2022-05-01	2022-01-02	0.5
NFE2.p2	6.46E-01	0.07	0.06	0.9	3.66E-03	0.07	0.13	2022-09-01	2.0	0.5
FOS_FOS{B,L1}_JUN{B,D}.p2	3.71E-01	0.09	0.1	2022-01-01	3.91E-03	0.09	0.16	2022-07-01	2022-05-01	0.7
MAFB.p2	8.79E-01	0.36	0.31	0.9	5.82E-03	0.36	0.46	2022-03-01	2022-05-01	0.7
XBP1.p3	7.63E-01	0.07	0.05	0.8	1.00E-02	0.07	0.11	2022-08-01	2022-02-02	0.5
TFAP2B.p2	6.50E-01	0.46	0.45	1.0	1.07E-02	0.46	0.55	2022-02-01	2022-02-01	0.8
TFDP1.p2	5.63E-02	0.58	0.67	2022-01-01	1.35E-02	0.58	0.67	2022-01-01	1.0	1.0
HES1.p2	1.24E-01	0.22	0.27	2022-02-01	1.69E-02	0.22	0.29	2022-03-01	2022-01-01	0.9
ZFP161.p2	4.64E-01	0.27	0.28	1.0	2.13E-02	0.27	0.34	2022-03-01	2022-02-01	0.8
NHLH1,2.p2	7.07E-01	0.32	0.3	0.9	2.40E-02	0.32	0.4	2022-02-01	2022-03-01	0.8
PAX2.p2	1.76E-01	0.22	0.26	2022-02-01	2.46E-02	0.22	0.28	2022-03-01	2022-01-01	0.9
TFAP2{A,C}.p2	4.95E-01	0.67	0.68	1.0	2.59E-02	0.67	0.74	2022-01-01	2022-01-01	0.9
BACH2.p2	7.20E-01	0.05	0.04	0.8	2.99E-02	0.05	0.09	2022-07-01	2022-01-02	0.5
SP1.p2	1.76E-01	0.71	0.76	2022-01-01	3.52E-02	0.71	0.78	2022-01-01	1.0	1.0
bHLH_family.p2	1.66E-01	0.26	0.31	2022-02-01	3.56E-02	0.26	0.33	2022-02-01	1.0	1.0
ADNP_IRX_SIX_ZHX.p2	2.33E-01	0.08	0.1	2022-03-01	3.61E-02	0.08	0.12	2022-05-01	2022-02-01	0.9
ARNT_ARNT2_BHLHB2_MAX_MYC_USF1.p2	1.67E-01	0.13	0.17	2022-03-01	3.64E-02	0.13	0.18	2022-04-01	2022-01-01	0.9
TP53.p2	1.99E-02	0.06	0.11	2.0	3.88E-02	0.06	0.09	2022-06-01	0.8	2022-02-01
NFE2L1.p2	5.19E-02	0.25	0.33	2022-03-01	3.98E-02	0.25	0.32	2022-02-01	0.9	2022-01-01
ATF6.p2	3.78E-01	0.12	0.14	2022-01-01	4.56E-02	0.12	0.17	2022-04-01	2022-02-01	0.8
HIC1.p2	1.27E-01	0.35	0.41	2022-02-01	4.99E-02	0.35	0.41	2022-02-01	1.0	1.0
HIF1A.p2	8.21E-01	0.15	0.13	0.8	5.39E-02	0.15	0.2	2022-03-01	2022-06-01	0.6
NKX3-2.p2	4.28E-01	0.23	0.24	2022-01-01	5.48E-02	0.23	0.28	2022-02-01	2022-02-01	0.9
ZEB1.p2	6.30E-01	0.26	0.25	1.0	5.70E-02	0.26	0.32	2022-02-01	2022-03-01	0.8
KLF12.p2	4.08E-02	0.34	0.43	2022-03-01	5.75E-02	0.34	0.4	2022-02-01	0.9	2022-01-01
HBP1_HMGB_SSRP1_UBTF.p2	1.88E-01	0.16	0.2	2022-02-01	5.90E-02	0.16	0.21	2022-03-01	1.0	1.0
PBX1.p2	3.59E-01	0.06	0.07	2022-02-01	6.07E-02	0.06	0.09	2022-05-01	2022-03-01	0.8
PAX5.p2	5.66E-01	0.39	0.39	1.0	6.24E-02	0.39	0.45	2022-02-01	2022-02-01	0.9
FOSL2.p2	2.64E-01	0.09	0.11	2022-02-01	7.62E-02	0.09	0.13	2022-04-01	2022-01-01	0.9
RXR{A,B,G}.p2	5.11E-01	0.17	0.18	1.0	7.63E-02	0.17	0.22	2022-03-01	2022-02-01	0.8
IKZF1.p2	1.12E-01	0.13	0.18	2022-04-01	9.25E-02	0.13	0.17	2022-03-01	0.9	2022-01-01
SMAD1..7,9.p2	4.40E-01	0.15	0.16	2022-01-01	1.02E-01	0.15	0.18	2022-03-01	2022-02-01	0.8
MTF1.p2	6.85E-02	0.31	0.39	2022-02-01	1.05E-01	0.31	0.36	2022-02-01	0.9	2022-01-01
POU2F1..3.p2	9.56E-01	0.03	0.01	0.3	1.05E-01	0.03	0.05	2022-06-01	5.0	0.2
ATF4.p2	2.57E-01	0.1	0.13	2022-02-01	1.06E-01	0.1	0.13	2022-03-01	2022-01-01	0.9
STAT1,3.p3	9.32E-01	0.03	0.01	0.4	1.08E-01	0.03	0.05	2022-07-01	2022-04-04	0.2
YY1.p2	4.56E-01	0.52	0.53	1.0	1.12E-01	0.52	0.57	2022-01-01	2022-01-01	0.9
NANOG.p2	1.65E-01	0.08	0.11	2022-04-01	1.25E-01	0.08	0.11	2022-03-01	1.0	1.0
MYFfamily.p2	9.69E-01	0.26	0.19	0.7	1.27E-01	0.26	0.3	2022-02-01	2022-06-01	0.6
KLF4.p3	1.97E-01	0.64	0.69	2022-01-01	1.31E-01	0.64	0.68	2022-01-01	1.0	1.0
SOX5.p2	6.19E-01	0.09	0.08	0.9	1.32E-01	0.09	0.11	2022-03-01	2022-04-01	0.7
RREB1.p2	1.22E-01	0.18	0.23	2022-03-01	1.39E-01	0.18	0.21	2022-02-01	0.9	2022-01-01
FOXN1.p2	8.29E-01	0.12	0.09	0.8	1.39E-01	0.12	0.15	2022-02-01	2022-06-01	0.6
POU5F1.p2	7.87E-01	0.11	0.09	0.8	1.40E-01	0.11	0.14	2022-03-01	2022-05-01	0.7
NR1H4.p2	2.51E-01	0.1	0.13	2022-02-01	1.50E-01	0.1	0.13	2022-03-01	1.0	1.0
VSX1,2.p2	1.42E-01	0.02	0.04	2.0	1.58E-01	0.02	0.03	2022-06-01	0.8	2022-02-01
CREB1.p2	3.90E-01	0.12	0.14	2022-01-01	1.61E-01	0.12	0.15	2022-02-01	2022-01-01	0.9
CTCF.p2	1.21E-01	0.05	0.08	2022-06-01	1.86E-01	0.05	0.07	2022-03-01	0.8	2022-02-01
NFY{A,B,C}.p2	1.53E-02	0.15	0.24	2022-06-01	1.89E-01	0.15	0.18	2022-02-01	0.7	2022-03-01
NANOG{mouse}.p2	7.64E-01	0.08	0.06	0.8	1.92E-01	0.08	0.1	2022-03-01	2022-06-01	0.6
NKX6-1,2.p2	1.68E-01	0.05	0.07	2022-05-01	2.00E-01	0.05	0.06	2022-03-01	0.9	2022-02-01
TAL1_TCF{3,4,12}.p2	3.16E-01	0.05	0.06	2022-03-01	2.18E-01	0.05	0.06	2022-03-01	1.0	1.0
HOX{A4,D4}.p2	3.76E-01	0.1	0.11	2022-01-01	2.24E-01	0.1	0.12	2022-02-01	2022-01-01	0.9
NFKB1_REL_RELA.p2	4.00E-01	0.12	0.14	2022-01-01	2.31E-01	0.12	0.14	2022-02-01	2022-01-01	0.9
TFAP4.p2	3.93E-01	0.18	0.2	2022-01-01	2.32E-01	0.18	0.21	2022-01-01	1.0	1.0
PRRX1,2.p2	5.03E-01	0.19	0.2	1.0	2.33E-01	0.19	0.22	2022-01-01	2022-01-01	0.9
LEF1_TCF7_TCF7L1,2.p2	9.59E-02	0.09	0.14	2022-05-01	2.37E-01	0.09	0.11	2022-02-01	0.8	2022-02-01
EBF1.p2	3.47E-01	0.12	0.14	2022-01-01	2.41E-01	0.12	0.14	2022-02-01	1.0	1.0
IKZF2.p2	9.50E-01	0.12	0.07	0.6	2.56E-01	0.12	0.14	2022-02-01	2022-09-01	0.5
TCF4_dimer.p2	6.48E-01	0.41	0.4	1.0	2.57E-01	0.41	0.44	2022-01-01	2022-01-01	0.9
GFI1B.p2	5.34E-01	0.05	0.05	1.0	2.61E-01	0.05	0.06	2022-03-01	2022-02-01	0.8
MAZ.p2	3.35E-03	0.65	0.78	2022-02-01	2.81E-01	0.65	0.67	1.0	0.9	2022-02-01
FOX{C1,C2}.p2	9.96E-01	0.09	0.03	0.3	2.91E-01	0.09	0.11	2022-02-01	2022-05-03	0.3
MYOD1.p2	8.56E-01	0.22	0.18	0.8	2.91E-01	0.22	0.24	2022-01-01	2022-03-01	0.8
SPZ1.p2	2.44E-01	0.31	0.34	2022-01-01	2.96E-01	0.31	0.33	2022-01-01	1.0	1.0
FOXL1.p2	8.31E-01	0.08	0.06	0.7	3.00E-01	0.08	0.1	2022-02-01	2022-06-01	0.6
NKX2-3_NKX2-5.p2	3.48E-01	0.08	0.09	2022-02-01	3.01E-01	0.08	0.09	2022-02-01	1.0	1.0
HNF1A.p2	4.61E-01	0.03	0.03	2022-02-01	3.04E-01	0.03	0.03	2022-03-01	2022-01-01	0.9
ESR1.p2	7.44E-02	0.11	0.17	2022-05-01	3.30E-01	0.11	0.13	2022-01-01	0.8	2022-03-01
HOX{A6,A7,B6,B7}.p2	5.11E-01	0.24	0.24	1.0	3.31E-01	0.24	0.25	2022-01-01	2022-01-01	0.9
SREBF1,2.p2	4.72E-01	0.11	0.11	2022-01-01	3.36E-01	0.11	0.12	2022-01-01	2022-01-01	0.9
ZNF148.p2	2.69E-01	0.26	0.29	2022-01-01	3.37E-01	0.26	0.28	2022-01-01	0.9	2022-01-01
PATZ1.p2	2.17E-02	0.59	0.7	2022-02-01	3.62E-01	0.59	0.61	1.0	0.9	2022-01-01
GATA1..3.p2	6.90E-01	0.35	0.33	0.9	3.64E-01	0.35	0.37	1.0	2022-01-01	0.9
CRX.p2	5.45E-01	0.08	0.08	1.0	3.67E-01	0.08	0.09	2022-01-01	2022-01-01	0.9
TFEB.p2	1.72E-01	0.08	0.11	2022-04-01	3.73E-01	0.08	0.09	2022-01-01	0.8	2022-02-01
NFATC1..3.p2	8.39E-01	0.14	0.11	0.8	3.79E-01	0.14	0.16	2022-01-01	2022-04-01	0.7
NR3C1.p2	7.19E-01	0.05	0.04	0.8	3.80E-01	0.05	0.06	2022-01-01	2022-04-01	0.7
ZNF423.p2	5.64E-01	0.09	0.09	1.0	3.83E-01	0.09	0.1	2022-01-01	2022-01-01	0.9
SOX2.p2	1.64E-01	0.16	0.2	2022-03-01	3.89E-01	0.16	0.17	2022-01-01	0.8	2022-02-01
TLX1..3_NFIC{dimer}.p2	1.38E-01	0.08	0.11	2022-04-01	4.08E-01	0.08	0.09	2022-01-01	0.8	2022-03-01
STAT5{A,B}.p2	6.81E-01	0.02	0.02	0.9	4.16E-01	0.02	0.03	2022-02-01	2022-04-01	0.7
T.p2	3.82E-01	0.05	0.06	2022-02-01	4.18E-01	0.05	0.06	2022-01-01	0.9	2022-01-01
PDX1.p2	5.55E-01	0.03	0.03	1.0	4.26E-01	0.03	0.03	2022-01-01	2022-01-01	0.9
NFE2L2.p2	3.23E-01	0.06	0.07	2022-03-01	4.30E-01	0.06	0.06	2022-01-01	0.9	2022-02-01
ONECUT1,2.p2	7.66E-01	0.04	0.03	0.8	4.33E-01	0.04	0.05	2022-01-01	2022-05-01	0.7
RXRG_dimer.p3	6.95E-01	0.02	0.02	0.8	4.38E-01	0.02	0.03	2022-02-01	2022-04-01	0.7
TEAD1.p2	2.82E-02	0.08	0.14	2022-08-01	4.44E-01	0.08	0.08	2022-01-01	0.6	2022-07-01
GZF1.p2	3.50E-02	0.03	0.06	2022-05-02	4.52E-01	0.03	0.03	2022-01-01	0.5	2022-02-02
HMGA1,2.p2	4.86E-01	0.1	0.1	1.0	4.65E-01	0.1	0.1	1.0	1.0	1.0
TLX2.p2	5.49E-01	0.16	0.16	1.0	4.72E-01	0.16	0.16	1.0	1.0	1.0
MEF2{A,B,C,D}.p2	1.50E-01	0.05	0.08	2022-05-01	4.73E-01	0.05	0.06	2022-01-01	0.7	2022-05-01
MZF1.p2	5.98E-01	0.46	0.45	1.0	4.84E-01	0.46	0.46	1.0	1.0	1.0
EVI1.p2	7.00E-01	0.06	0.05	0.9	4.90E-01	0.06	0.06	1.0	2022-02-01	0.8
ESRRA.p2	8.90E-01	0.07	0.04	0.6	4.93E-01	0.07	0.07	1.0	2022-07-01	0.6
MSX1,2.p2	8.35E-01	0.07	0.05	0.7	4.98E-01	0.07	0.07	1.0	2022-04-01	0.7
SRF.p3	3.82E-01	0.03	0.04	2022-03-01	5.02E-01	0.03	0.03	2022-01-01	0.8	2022-02-01
HOX{A5,B5}.p2	1.31E-01	0.04	0.07	2022-07-01	5.03E-01	0.04	0.05	1.0	0.6	2022-06-01
NR5A1,2.p2	6.86E-01	0.17	0.16	0.9	5.05E-01	0.17	0.17	1.0	2022-01-01	0.9
GFI1.p2	4.07E-01	0.15	0.17	2022-01-01	5.14E-01	0.15	0.16	1.0	0.9	2022-01-01
SRY.p2	9.93E-02	0.14	0.19	2022-04-01	5.15E-01	0.14	0.14	1.0	0.7	2022-04-01
FOXP3.p2	9.62E-01	0.03	0.01	0.3	5.26E-01	0.03	0.03	1.0	2022-03-03	0.3
SOX17.p2	2.39E-02	0.15	0.23	2022-05-01	5.29E-01	0.15	0.15	1.0	0.7	2022-05-01
TFCP2.p2	8.28E-02	0.24	0.3	2022-03-01	5.38E-01	0.24	0.24	1.0	0.8	2022-03-01
PAX8.p2	8.87E-01	0.02	0.01	0.5	5.48E-01	0.02	0.02	1.0	2022-02-02	0.5
PPARG.p2	5.40E-01	0.04	0.04	1.0	5.50E-01	0.04	0.04	1.0	1.0	1.0
SPI1.p2	7.73E-01	0.44	0.41	0.9	5.51E-01	0.44	0.44	1.0	2022-01-01	0.9
LMO2.p2	3.74E-01	0.23	0.25	2022-01-01	5.54E-01	0.23	0.23	1.0	0.9	2022-01-01
EOMES.p2	8.06E-01	0.11	0.08	0.8	5.70E-01	0.11	0.1	1.0	2022-02-01	0.8
TGIF1.p2	3.37E-02	0.09	0.16	2022-07-01	5.74E-01	0.09	0.09	1.0	0.6	2022-07-01
ZNF238.p2	7.56E-01	0.05	0.04	0.8	5.78E-01	0.05	0.05	1.0	2022-02-01	0.8
SNAI1..3.p2	9.43E-01	0.4	0.32	0.8	5.81E-01	0.4	0.39	1.0	2022-02-01	0.8
PAX3,7.p2	1.00E+00	0.02	0	0.0	5.89E-01	0.02	0.02	1.0	#DIV/0!	0.0
SOX{8,9,10}.p2	4.85E-02	0.12	0.19	2022-05-01	5.97E-01	0.12	0.12	1.0	0.6	2022-06-01
HMX1.p2	5.11E-01	0.14	0.15	1.0	6.07E-01	0.14	0.14	1.0	0.9	2022-01-01
ELF1,2,4.p2	6.90E-01	0.42	0.4	1.0	6.11E-01	0.42	0.41	1.0	1.0	1.0
HSF1,2.p2	2.67E-01	0.14	0.17	2022-02-01	6.55E-01	0.14	0.13	0.9	0.8	2022-03-01
EWSR1-FLI1.p2	5.56E-01	0.02	0.02	2022-01-01	6.57E-01	0.02	0.02	0.9	0.8	2022-02-01
NR6A1.p2	7.23E-01	0.03	0.02	0.8	6.76E-01	0.03	0.02	0.9	2022-01-01	0.9
EHF.p2	7.83E-01	0.25	0.22	0.9	6.79E-01	0.25	0.24	0.9	2022-01-01	0.9
RFX1..5_RFXANK_RFXAP.p2	7.46E-01	0.06	0.05	0.8	6.86E-01	0.06	0.06	0.9	2022-01-01	0.9
SPIB.p2	6.07E-01	0.33	0.32	1.0	6.92E-01	0.33	0.32	1.0	1.0	1.0
ZBTB16.p2	9.29E-01	0.03	0.01	0.4	6.98E-01	0.03	0.02	0.8	2022-02-02	0.5
ZBTB6.p2	6.32E-02	0.19	0.26	2022-04-01	7.17E-01	0.19	0.18	0.9	0.7	2022-05-01
ARID5B.p2	9.60E-02	0.04	0.07	2022-08-01	7.17E-01	0.04	0.03	0.8	0.5	2022-01-02
BPTF.p2	8.41E-01	0.11	0.08	0.8	7.32E-01	0.11	0.1	0.9	2022-02-01	0.9
TBP.p2	6.15E-01	0.06	0.05	0.9	7.49E-01	0.06	0.05	0.8	0.9	2022-01-01
LHX3,4.p2	5.09E-01	0.05	0.05	2022-01-01	7.55E-01	0.05	0.04	0.8	0.8	2022-03-01
EN1,2.p2	8.94E-01	0.11	0.07	0.7	7.61E-01	0.11	0.09	0.9	2022-03-01	0.8
AIRE.p2	4.46E-01	0.02	0.02	2022-03-01	7.61E-01	0.02	0.01	0.7	0.6	2022-08-01
FOX{I1,J2}.p2	4.42E-01	0.08	0.08	2022-01-01	7.75E-01	0.08	0.06	0.8	0.8	2022-03-01
HNF4A_NR2F1,2.p2	4.06E-01	0.17	0.19	2022-01-01	7.76E-01	0.17	0.16	0.9	0.8	2022-02-01
PAX6.p2	9.49E-01	0.03	0.01	0.3	7.78E-01	0.03	0.02	0.8	2022-02-02	0.5
E2F1..5.p2	4.40E-01	0.13	0.14	2022-01-01	7.85E-01	0.13	0.11	0.9	0.8	2022-02-01
GLI1..3.p2	6.16E-01	0.16	0.16	1.0	7.87E-01	0.16	0.14	0.9	0.9	2022-01-01
NKX3-1.p2	6.19E-01	0.04	0.04	0.9	7.87E-01	0.04	0.03	0.8	0.8	2022-02-01
RBPJ.p2	2.04E-01	0.1	0.13	2022-03-01	7.88E-01	0.1	0.08	0.8	0.6	2022-06-01
NKX2-1,4.p2	9.22E-01	0.06	0.03	0.5	7.95E-01	0.06	0.05	0.8	2022-05-01	0.7
ETS1,2.p2	7.35E-01	0.23	0.21	0.9	7.98E-01	0.23	0.21	0.9	1.0	1.0
FOXD3.p2	2.54E-01	0.11	0.14	2022-02-01	8.10E-01	0.11	0.09	0.8	0.7	2022-05-01
HLF.p2	6.75E-01	0.06	0.05	0.9	8.12E-01	0.06	0.05	0.8	0.9	2022-01-01
ALX1.p2	2.41E-01	0.03	0.04	2022-06-01	8.36E-01	0.03	0.02	0.7	0.4	2022-04-02
RORA.p2	7.18E-01	0.03	0.02	0.8	8.36E-01	0.03	0.02	0.7	0.8	2022-02-01
ZIC1..3.p2	1.03E-01	0.17	0.23	2022-03-01	8.36E-01	0.17	0.15	0.9	0.7	2022-05-01
JUN.p2	4.71E-01	0.12	0.13	2022-01-01	8.37E-01	0.12	0.1	0.8	0.8	2022-03-01
CDC5L.p2	1.73E-01	0.05	0.07	2022-05-01	8.42E-01	0.05	0.03	0.7	0.5	2022-01-02
IRF1,2,7.p3	8.49E-01	0.05	0.03	0.6	8.51E-01	0.05	0.03	0.7	2022-01-01	0.9
DBP.p2	4.85E-01	0.14	0.15	1.0	8.63E-01	0.14	0.11	0.8	0.8	2022-03-01
RXRA_VDR{dimer}.p2	1.76E-01	0.06	0.08	2022-05-01	8.69E-01	0.06	0.04	0.7	0.5	2022-01-02
CEBPA,B_DDIT3.p2	5.59E-02	0.04	0.08	2022-09-01	8.77E-01	0.04	0.03	0.7	0.3	2022-09-02
POU5F1_SOX2{dimer}.p2	2.26E-02	0.04	0.08	2022-03-02	8.79E-01	0.04	0.02	0.6	0.3	2022-06-03
DMAP1_NCOR{1,2}_SMARC.p2	6.85E-01	0.1	0.09	0.9	8.82E-01	0.1	0.08	0.8	0.9	2022-02-01
FOX{F1,F2,J1}.p2	4.83E-01	0.06	0.06	2022-01-01	8.83E-01	0.06	0.04	0.7	0.6	2022-06-01
HOXA9_MEIS1.p2	9.42E-01	0.03	0.01	0.4	8.87E-01	0.03	0.02	0.6	2022-07-01	0.6
REST.p3	6.99E-01	0.01	0.01	0.8	8.87E-01	0.01	0.01	0.5	0.6	2022-08-01
NKX2-2,8.p2	9.79E-01	0.06	0.02	0.4	8.89E-01	0.06	0.04	0.7	2022-09-01	0.5
NFIL3.p2	1.00E+00	0.03	0	0.0	9.06E-01	0.03	0.02	0.6	#DIV/0!	0.0
ELK1,4_GABP{A,B1}.p3	8.56E-01	0.34	0.29	0.9	9.09E-01	0.34	0.29	0.9	1.0	1.0
POU3F1..4.p2	1.60E-01	0.05	0.07	2022-06-01	9.13E-01	0.05	0.03	0.6	0.4	2022-05-02
MYBL2.p2	3.75E-01	0.06	0.07	2022-02-01	9.15E-01	0.06	0.04	0.7	0.6	2022-08-01
PITX1..3.p2	8.44E-02	0.04	0.07	2022-09-01	9.16E-01	0.04	0.02	0.6	0.3	2022-02-03
FOXA2.p3	7.14E-01	0.06	0.05	0.8	9.18E-01	0.06	0.04	0.7	0.8	2022-03-01
ATF2.p2	4.43E-01	0.08	0.08	2022-01-01	9.18E-01	0.08	0.05	0.7	0.6	2022-06-01
MYB.p2	1.15E-01	0.15	0.2	2022-03-01	9.19E-01	0.15	0.11	0.8	0.6	2022-07-01
NFIX.p2	1.25E-01	0.07	0.1	2022-05-01	9.20E-01	0.07	0.05	0.7	0.4	2022-03-02
NR4A2.p2	9.01E-02	0.2	0.26	2022-03-01	9.21E-01	0.2	0.16	0.8	0.6	2022-06-01
TBX4,5.p2	1.41E-01	0.14	0.19	2022-03-01	9.26E-01	0.14	0.11	0.8	0.6	2022-07-01
CUX2.p2	1.00E+00	0.01	0	0.0	9.27E-01	0.01	0.01	0.4	#DIV/0!	0.0
GATA6.p2	8.72E-01	0.08	0.05	0.7	9.28E-01	0.08	0.05	0.7	1.0	1.0
AR.p2	7.84E-01	0.02	0.01	0.7	9.38E-01	0.02	0.01	0.4	0.6	2022-08-01
ZNF143.p2	6.90E-01	0.13	0.11	0.9	9.41E-01	0.13	0.09	0.7	0.8	2022-02-01
EP300.p2	8.07E-01	0.22	0.19	0.9	9.47E-01	0.22	0.17	0.8	0.9	2022-01-01
CDX1,2,4.p2	7.48E-01	0.05	0.04	0.8	9.54E-01	0.05	0.03	0.5	0.7	2022-05-01
ZNF384.p2	8.35E-01	0.14	0.11	0.8	9.55E-01	0.14	0.1	0.7	0.9	2022-01-01
STAT2,4,6.p2	9.20E-01	0.17	0.13	0.7	9.62E-01	0.17	0.13	0.7	1.0	1.0
POU6F1.p2	7.82E-01	0.03	0.02	0.7	9.67E-01	0.03	0.01	0.4	0.6	2022-08-01
FOX{D1,D2}.p2	7.59E-01	0.07	0.05	0.8	9.74E-01	0.07	0.03	0.5	0.7	2022-05-01
PAX4.p2	1.86E-01	0.02	0.04	2022-08-01	9.84E-01	0.02	0.01	0.2	0.1	2022-03-07
GTF2A1,2.p2	7.55E-01	0.12	0.1	0.8	9.85E-01	0.12	0.07	0.6	0.7	2022-04-01
PRDM1.p3	4.05E-01	0.02	0.03	2022-03-01	9.86E-01	0.02	0.01	0.2	0.2	2022-04-05
RUNX1..3.p2	8.07E-01	0.11	0.08	0.8	9.91E-01	0.11	0.06	0.5	0.7	2022-05-01
FEV.p2	6.94E-01	0.34	0.32	0.9	9.93E-01	0.34	0.26	0.8	0.8	2022-02-01
POU1F1.p2	5.27E-01	0.03	0.03	2022-01-01	9.94E-01	0.03	0.01	0.2	0.2	2022-04-05
GTF2I.p2	7.76E-03	0.42	0.55	2022-03-01	9.95E-01	0.42	0.33	0.8	0.6	2022-07-01
FOXQ1.p2	6.17E-01	0.07	0.06	0.9	9.97E-01	0.07	0.02	0.3	0.4	2022-07-02
HAND1,2.p2	6.34E-01	0.08	0.07	0.9	9.98E-01	0.08	0.03	0.4	0.4	2022-05-02
FOXO1,3,4.p2	8.19E-01	0.07	0.05	0.7	9.99E-01	0.07	0.02	0.3	0.4	2022-03-02
Table S3 : Transcription factor binding site enrichment analysis. Columns represent: 1-Transcription factor binding site motif ID, 2- P-value of motif enrichment in 1000 nucleotide regions of the genes up-regulated in NT-3 condition as compared to NGF condition obtained by Fisher count test, 2- percentage of promoter regions of all genes expressed in the neurons containing at least one motif, 3- …
