# Supplementary material for: The predicted RNA-binding protein regulome of axonal mRNAs
Source: HighWire-hosted journal article supplement (doi:10.1101/gr.277804.123), 2023-08-15
Supplement: Supplemental_Tables.zip [file Supplemental Table S4.xlsx]

## Sheet: Sheet1
txID	GS	id.proximal(Ip)	id.distal (Id)	d(PUD=Ip/Ip+Id)	PUD.NGF.cb	PUD.NT3.cb	NGF.cb.Ip	NGF.cb.Id	NT3.cb.Ip	NT3.cb.Id	promoter-distal shift in NT3	promoter-proximal shift in NGF
ENSRNOT00000006098	Cacnb1	ENSRNOT00000006098.1	ENSRNOT00000006098.4	0.21	0.90	0.69	145.45	16.46	86.11	37.78	TRUE	TRUE
ENSRNOT00000019820	Cbfa2t3	ENSRNOT00000019820.1	ENSRNOT00000019820.3	0.31	0.80	0.49	42.27	10.56	29.24	29.70	TRUE	FALSE
ENSRNOT00000003998	Faslg	ENSRNOT00000003998.1	ENSRNOT00000003998.5	0.24	0.58	0.33	30.71	22.22	18.94	39.85	TRUE	TRUE
ENSRNOT00000066708	Gba2	ENSRNOT00000066708.0	ENSRNOT00000066708.2	0.51	0.83	0.32	74.75	18.99	42.88	50.96	TRUE	FALSE
ENSRNOT00000061070	Mapkapk2	ENSRNOT00000061070.1	ENSRNOT00000061070.5	0.41	0.68	0.27	36.72	18.64	2022-05-15	38.84	TRUE	TRUE
ENSRNOT00000026413	Mettl6	ENSRNOT00000026413.0	ENSRNOT00000026413.4	0.49	0.95	0.46	170.40	8.59	66.11	39.34	TRUE	FALSE
ENSRNOT00000014007	Mrap2	ENSRNOT00000014007.1	ENSRNOT00000014007.3	0.27	0.59	0.32	185.20	120.40	87.88	188.28	TRUE	TRUE
ENSRNOT00000022115	Necab3	ENSRNOT00000022115.1	ENSRNOT00000022115.0	0.27	0.39	0.13	57.88	89.75	19.19	138.89	TRUE	TRUE
ENSRNOT00000067538	Nfib	ENSRNOT00000067538.0	ENSRNOT00000067538.3	0.26	0.74	0.48	104.65	36.67	120.96	148.08	TRUE	FALSE
ENSRNOT00000019473	S1pr3	ENSRNOT00000019473.2	ENSRNOT00000019473.6	0.35	0.45	0.10	29.80	36.92	2022-12-12	109.75	TRUE	FALSE
ENSRNOT00000065126	Scn9a	ENSRNOT00000065126.1	ENSRNOT00000065126.4	0.25	0.85	0.60	481.11	87.78	199.34	132.78	TRUE	TRUE
ENSRNOT00000036365	Sec63	ENSRNOT00000036365.1	ENSRNOT00000036365.5	0.23	0.66	0.44	1379.85	693.03	817.78	1050.30	TRUE	TRUE
ENSRNOT00000007028	Spred1	ENSRNOT00000007028.2	ENSRNOT00000007028.5	0.23	0.62	0.39	496.67	304.04	335.71	526.01	TRUE	TRUE
ENSRNOT00000031191	Usp15	ENSRNOT00000031191.1	ENSRNOT00000031191.4	0.22	0.67	0.45	1427.32	688.23	713.64	862.37	TRUE	TRUE
ENSRNOT00000058852	Wac	ENSRNOT00000058852.2	ENSRNOT00000058852.8	0.32	0.76	0.45	189.29	57.98	107.42	137.78	TRUE	FALSE
ENSRNOT00000073235	Zfp955a	ENSRNOT00000073235.0	ENSRNOT00000073235.6	0.22	0.50	0.27	282.22	282.12	151.72	379.14	TRUE	FALSE
ENSRNOT00000074269	Agtr2	ENSRNOT00000074269.1	ENSRNOT00000074269.0	0.30	0.52	0.22	2022-08-23	20.20	6.36	22.63	FALSE	TRUE
ENSRNOT00000008510	Klhl9	ENSRNOT00000008510.1	ENSRNOT00000008510.5	0.30	0.82	0.52	121.46	2022-11-26	44.55	41.41	FALSE	TRUE
ENSRNOT00000076485	LOC678893	ENSRNOT00000076485.2	ENSRNOT00000076485.4	0.24	0.47	0.23	547.32	634.14	254.75	987.98	FALSE	TRUE
ENSRNOT00000013001	Pnma2	ENSRNOT00000013001.3	ENSRNOT00000013001.8	0.21	0.43	0.22	124.04	163.43	61.77	224.49	FALSE	TRUE
ENSRNOT00000030244	RGD1311648	ENSRNOT00000030244.1	ENSRNOT00000030244.3	0.29	0.46	0.17	212.88	253.79	95.10	763.23	FALSE	TRUE
ENSRNOT00000008399	RGD1565692	ENSRNOT00000008399.1	ENSRNOT00000008399.0	0.61	0.79	0.18	45.30	11.52	14.65	165.00	FALSE	TRUE
ENSRNOT00000051397	Set	ENSRNOT00000051397.2	ENSRNOT00000051397.5	0.21	0.56	0.35	11412.88	9098.28	5220.81	9898-08-01	FALSE	TRUE
ENSRNOT00000016191	Slc39a13	ENSRNOT00000016191.1	ENSRNOT00000016191.3	0.22	0.41	0.19	77.07	113.08	57.98	249.49	FALSE	TRUE
ENSRNOT00000012939	Snai1	ENSRNOT00000012939.1	ENSRNOT00000012939.0	0.30	0.58	0.28	15.66	10.61	6.46	17.17	FALSE	TRUE
ENSRNOT00000006371	Tc2n	ENSRNOT00000006371.1	ENSRNOT00000006371.0	0.20	0.56	0.35	32.32	24.14	10.00	23.69	FALSE	TRUE
ENSRNOT00000035048	Ube2v1	ENSRNOT00000035048.1	ENSRNOT00000035048.5	0.22	0.42	0.19	1234.44	1734.95	512.58	2160.86	FALSE	TRUE
Table S4 : Distal-to-proximal promoter 3’ UTR shifts in cell bodies of NGF treated cells compared to NT-3. Columns represent: 1- Ensembl Rn5 transcript ID, 2- gene symbol, 3- ID of the promoter-proximal 3’ UTR isoform (Ip), 4- ID of the promoter-distal 3’ UTR isoform (Id), 5- difference in relative promoter-proximal (Ip/Ip+Id) usage in the cell body compartment between NGF and NT-3 condition, 6- …
