# Supplementary material for: The predicted RNA-binding protein regulome of axonal mRNAs
Source: HighWire-hosted journal article supplement (doi:10.1101/gr.277804.123), 2023-08-15
Supplement: Supplemental_Tables.zip [file Supplemental Table S5.xlsx]

## Sheet: Sheet1
txID	GS	id.proximal(Ip)	id.distal (Id)	d(PUD=Ip/Ip+Id)	PUD.NGF.cb	PUD.NT3.cb	NGF.cb.Ip	NGF.cb.Id	NT3.cb.Ip	NT3.cb.Id	promoter-distal shift in NT3	promoter-proximal shift in NGF
ENSRNOT00000024775	Gda	ENSRNOT00000024775.0	ENSRNOT00000024775.5	-0.52	0.30	0.82	41.11	92.73	160.71	30.00	TRUE	TRUE
ENSRNOT00000065289	Eno4	ENSRNOT00000065289.4	ENSRNOT00000065289.8	-0.72	0.00	0.72	0.00	44.65	47.42	18.13	TRUE	FALSE
ENSRNOT00000000909	Cggbp1	ENSRNOT00000000909.1	ENSRNOT00000000909.2	-0.22	0.40	0.62	90.56	137.88	88.54	54.65	TRUE	FALSE
ENSRNOT00000003867	Gsk3b	ENSRNOT00000003867.0	ENSRNOT00000003867.3	-0.44	0.24	0.68	152.63	494.70	310.81	147.78	TRUE	TRUE
ENSRNOT00000001485	RGD1562310	ENSRNOT00000001485.0	ENSRNOT00000001485.2	-0.26	0.41	0.67	19.70	28.64	35.86	2022-08-18	TRUE	TRUE
ENSRNOT00000003837	Cdc42bpa	ENSRNOT00000003837.1	ENSRNOT00000003837.3	-0.24	0.60	0.84	53.33	36.36	86.16	15.86	TRUE	TRUE
ENSRNOT00000006607	Actr2	ENSRNOT00000006607.0	ENSRNOT00000006607.2	-0.31	0.38	0.69	853.54	1379.95	1592.22	677.47	TRUE	TRUE
ENSRNOT00000033194	Wdfy3	ENSRNOT00000033194.1	ENSRNOT00000033194.2	-0.37	0.54	0.91	25.00	21.31	43.08	4.29	TRUE	FALSE
ENSRNOT00000064779	Gabra2	ENSRNOT00000064779.3	ENSRNOT00000064779.8	-0.24	0.20	0.45	2022-07-17	59.95	29.24	35.35	TRUE	TRUE
ENSRNOT00000035915	Arhgap22	ENSRNOT00000035915.0	ENSRNOT00000035915.5	-0.37	0.46	0.83	428.69	498.74	642.63	141.97	TRUE	TRUE
ENSRNOT00000021818	Lysmd3	ENSRNOT00000021818.0	ENSRNOT00000021818.6	-0.26	0.47	0.74	46.82	52.02	97.83	31.57	TRUE	FALSE
ENSRNOT00000074632	Cisd2	ENSRNOT00000074632.1	ENSRNOT00000074632.4	-0.27	0.35	0.62	536.11	1017.78	610.51	387.78	TRUE	FALSE
ENSRNOT00000064905	Scml4	ENSRNOT00000064905.1	ENSRNOT00000064905.3	-0.21	0.10	0.31	36.52	323.18	82.27	178.28	TRUE	TRUE
ENSRNOT00000007727	Bfsp1	ENSRNOT00000007727.0	ENSRNOT00000007727.5	-0.27	0.48	0.75	57.98	66.31	66.26	22.42	TRUE	FALSE
ENSRNOT00000009181	Arl5a	ENSRNOT00000009181.0	ENSRNOT00000009181.2	-0.25	0.31	0.56	164.24	369.04	183.64	142.88	TRUE	FALSE
ENSRNOT00000037895	Grem1	ENSRNOT00000037895.1	ENSRNOT00000037895.3	-0.36	0.22	0.58	11.52	43.74	33.79	25.20	TRUE	TRUE
ENSRNOT00000012551	Ubxn2b	ENSRNOT00000012551.0	ENSRNOT00000012551.4	-0.24	0.25	0.49	208.38	627.22	242.78	252.07	TRUE	FALSE
ENSRNOT00000035252	Elavl4	ENSRNOT00000035252.0	ENSRNOT00000035252.3	-0.27	0.60	0.87	3229.55	2163.18	7008-03-01	1062.07	TRUE	FALSE
ENSRNOT00000023434	Mgat3	ENSRNOT00000023434.1	ENSRNOT00000023434.4	-0.34	0.11	0.45	23.69	197.98	36.21	47.47	TRUE	TRUE
ENSRNOT00000048880	Syt1	ENSRNOT00000048880.0	ENSRNOT00000048880.3	-0.23	0.13	0.37	136.01	873.84	120.10	206.67	TRUE	FALSE
ENSRNOT00000033969	Endod1	ENSRNOT00000033969.2	ENSRNOT00000033969.4	-0.24	0.63	0.87	542.37	319.55	662.42	97.98	TRUE	FALSE
ENSRNOT00000021548	Rqcd1	ENSRNOT00000021548.1	ENSRNOT00000021548.2	-0.21	0.17	0.38	118.03	573.89	220.81	355.30	TRUE	TRUE
ENSRNOT00000022779	Actr1b	ENSRNOT00000022779.1	ENSRNOT00000022779.0	-0.23	0.38	0.61	2688.79	4301.92	3914.90	2491.21	TRUE	TRUE
ENSRNOT00000024701	Mgat4a	ENSRNOT00000024701.1	ENSRNOT00000024701.3	-0.28	0.50	0.78	46.46	47.02	65.86	18.79	TRUE	TRUE
ENSRNOT00000040920	Fam73a	ENSRNOT00000040920.2	ENSRNOT00000040920.4	-0.35	0.48	0.83	407.78	424.19	595.00	108.23	TRUE	FALSE
ENSRNOT00000039540	Ppfia4	ENSRNOT00000039540.1	ENSRNOT00000039540.0	-0.22	0.44	0.66	335.30	427.98	565.20	292.68	TRUE	TRUE
ENSRNOT00000073460	Adat2	ENSRNOT00000073460.0	ENSRNOT00000073460.3	-0.21	0.27	0.49	260.71	706.87	427.88	451.11	FALSE	TRUE
ENSRNOT00000020661	Asxl3	ENSRNOT00000020661.2	ENSRNOT00000020661.4	-0.25	0.22	0.48	20.20	75.20	31.26	40.05	FALSE	TRUE
ENSRNOT00000001766	Bcr	ENSRNOT00000001766.2	ENSRNOT00000001766.3	-0.23	0.60	0.82	23.99	15.15	48.84	10.56	FALSE	TRUE
ENSRNOT00000038057	Crtc1	ENSRNOT00000038057.2	ENSRNOT00000038057.3	-0.22	0.24	0.46	18.69	60.96	35.35	41.92	FALSE	TRUE
ENSRNOT00000012530	Dnajc15	ENSRNOT00000012530.0	ENSRNOT00000012530.2	-0.31	0.40	0.71	325.35	475.10	584.29	259.14	FALSE	TRUE
ENSRNOT00000028368	Lsm12	ENSRNOT00000028368.1	ENSRNOT00000028368.0	-0.22	0.24	0.46	332.53	1025.51	893.23	1055.05	FALSE	TRUE
ENSRNOT00000051121	Mitf	ENSRNOT00000051121.0	ENSRNOT00000051121.3	-0.31	0.12	0.44	6.97	50.56	56.87	48.23	FALSE	TRUE
ENSRNOT00000015452	Mtmr9	ENSRNOT00000015452.0	ENSRNOT00000015452.3	-0.21	0.43	0.64	934.39	1233.18	1651.46	870.76	FALSE	TRUE
ENSRNOT00000006459	Pak3	ENSRNOT00000006459.0	ENSRNOT00000006459.5	-0.24	0.63	0.87	1243.79	721.67	2588.13	367.83	FALSE	TRUE
ENSRNOT00000018475	Rad54l2	ENSRNOT00000018475.1	ENSRNOT00000018475.4	-0.28	0.35	0.64	64.09	115.91	102.37	56.82	FALSE	TRUE
ENSRNOT00000068341	Rbm41	ENSRNOT00000068341.0	ENSRNOT00000068341.4	-0.28	0.12	0.40	7.47	45.86	22.73	32.22	FALSE	TRUE
ENSRNOT00000014498	Rims4	ENSRNOT00000014498.2	ENSRNOT00000014498.3	-0.22	0.22	0.44	35.10	125.86	83.69	107.27	FALSE	TRUE
ENSRNOT00000006356	Sec24a	ENSRNOT00000006356.1	ENSRNOT00000006356.5	-0.20	0.34	0.54	52.73	105.86	91.31	74.24	FALSE	TRUE
ENSRNOT00000036717	Slc7a14	ENSRNOT00000036717.0	ENSRNOT00000036717.4	-0.26	0.42	0.68	532.22	858.38	1282.47	510.66	FALSE	TRUE
ENSRNOT00000000443	Srgn	ENSRNOT00000000443.1	ENSRNOT00000000443.0	-0.26	0.34	0.60	8.48	16.52	29.29	19.60	FALSE	TRUE
ENSRNOT00000044751	Ssh1	ENSRNOT00000044751.5	ENSRNOT00000044751.6	-0.28	0.47	0.75	170.56	187.02	327.12	91.77	FALSE	TRUE
ENSRNOT00000009122	Synj2bp	ENSRNOT00000009122.1	ENSRNOT00000009122.7	-0.29	0.51	0.80	252.63	242.68	434.19	104.49	FALSE	TRUE
ENSRNOT00000048474	Tmem132c	ENSRNOT00000048474.2	ENSRNOT00000048474.5	-0.21	0.30	0.51	48.48	111.26	106.06	100.66	FALSE	TRUE
ENSRNOT00000064623	Zfp462	ENSRNOT00000064623.2	ENSRNOT00000064623.6	-0.21	0.22	0.44	181.16	622.73	304.80	388.84	FALSE	TRUE
Table S5 : Distal-to-proximal promoter 3’ UTR shifts in cell bodies of NT-3 treated cells compared to NGF. Columns represent: 1- Ensembl Rn5 transcript ID, 2- gene symbol, 3- ID of the promoter-proximal 3’ UTR isoform (Ip), 4- ID of the promoter-distal 3’ UTR isoform (Id), 5- difference in relative promoter-proximal (Ip/Ip+Id) usage in the cell body compartment between NGF and NT-3 condition, 6- …
