# Supplementary material for: The predicted RNA-binding protein regulome of axonal mRNAs
Source: HighWire-hosted journal article supplement (doi:10.1101/gr.277804.123), 2023-08-15
Supplement: Supplemental_Tables.zip [file Supplemental Table S6.xlsx]

## Sheet: Sheet1
Clips	RBPs	Rn5 gene	Condensate_Zscore	log2FC(NGFvsNT3)cb	PVal(log2FC(NGFvsNT3)cb)	diff.transport	transport.ngf	transport.nt3	cb.ngf	cb.nt3	axons.ngf	axons.nt3
AARS1_1_K652	AARS1	AARS1	2022-08-02	0.27	2.71E-01	-0.70	0.33	2022-02-01	12.58	12.98	6.48	7.74
AARS1_2_K652	AARS1	AARS1	2022-08-02	0.27	2.71E-01	-0.70	0.33	2022-02-01	12.58	12.98	6.48	7.74
AGGF1_1_HepG2	AGGF1	Aggf1	-0.07	-0.10	-1.02E-01	0.09	0.45	0.37	10.25	10.30	2022-02-05	2022-04-04
AGGF1_2_HepG2	AGGF1	Aggf1	-0.07	-0.10	-1.02E-01	0.09	0.45	0.37	10.25	10.30	2022-02-05	2022-04-04
AGGF1_1_K652	AGGF1	Aggf1	-0.07	-0.10	-1.02E-01	0.09	0.45	0.37	10.25	10.30	2022-02-05	2022-04-04
AGGF1_2_K652	AGGF1	Aggf1	-0.07	-0.10	-1.02E-01	0.09	0.45	0.37	10.25	10.30	2022-02-05	2022-04-04
AKAP8L_1_K652	AKAP8L	Akap8l	2.83	0.24	2.43E-01	-0.98	-0.43	0.55	7.14	7.53	0.99	1.97
AKAP8L_2_K652	AKAP8L	Akap8l	2.83	0.24	2.43E-01	-0.98	-0.43	0.55	7.14	7.53	0.99	1.97
AUH_1_HepG2	AUH	Auh	1.44	-0.25	-2.52E-01	0.11	0.43	0.33	12.40	12.30	2022-09-08	6.91
AUH_2_HepG2	AUH	Auh	1.44	-0.25	-2.52E-01	0.11	0.43	0.33	12.40	12.30	2022-09-08	6.91
AUH_1_K652	AUH	Auh	1.44	-0.25	-2.52E-01	0.11	0.43	0.33	12.40	12.30	2022-09-08	6.91
AUH_2_K652	AUH	Auh	1.44	-0.25	-2.52E-01	0.11	0.43	0.33	12.40	12.30	2022-09-08	6.91
BCCIP_1_HepG2	BCCIP	Bccip	2022-08-01	0.56	5.60E-01	-0.33	-1.03	-0.70	8.46	9.17	0.00	1.64
BCCIP_2_HepG2	BCCIP	Bccip	2022-08-01	0.56	5.60E-01	-0.33	-1.03	-0.70	8.46	9.17	0.00	1.64
BUD13_1_HepG2	BUD13	Bud13	2.48	-0.21	-2.06E-01	2022-03-01	0.43	-0.60	8.37	8.31	2.96	2022-01-01
BUD13_2_HepG2	BUD13	Bud13	2.48	-0.21	-2.06E-01	2022-03-01	0.43	-0.60	8.37	8.31	2.96	2022-01-01
BUD13_1_K652	BUD13	Bud13	2.48	-0.21	-2.06E-01	2022-03-01	0.43	-0.60	8.37	8.31	2.96	2022-01-01
BUD13_2_K652	BUD13	Bud13	2.48	-0.21	-2.06E-01	2022-03-01	0.43	-0.60	8.37	8.31	2.96	2022-01-01
CDC40_1_HepG2	CDC40	Cdc40	1.91	-0.22	-2.22E-01	-1.11	-0.53	0.57	8.79	8.93	1.30	2.89
CDC40_2_HepG2	CDC40	Cdc40	1.91	-0.22	-2.22E-01	-1.11	-0.53	0.57	8.79	8.93	1.30	2.89
CELF2_iClip	CELF2	CELF2	2022-05-02	-0.35	-3.53E-01	-1.88	0.33	2.21	6.70	7.16	2022-01-01	4.37
CELF4_iClip	CELF4	CELF4	2022-05-02	-0.06	-6.05E-02	-1.13	-0.72	0.41	2022-09-11	11.63	4.41	5.85
CPSF160_iClip	CPSF160	Cpsf1	2022-12-02	0.37	3.71E-01	2022-01-01	1.35	0.33	9.21	9.74	6.24	2.79
CPSF6_1_K652	CPSF6	Cpsf6	2.89	0.04	4.42E-02	2.42	2022-08-02	-0.35	7.74	2022-12-08	4.77	1.91
CPSF6_2_K652	CPSF6	Cpsf6	2.89	0.04	4.42E-02	2.42	2022-08-02	-0.35	7.74	2022-12-08	4.77	1.91
CSTF2_1_HepG2	CSTF2	Cstf2	2.72	-0.18	-1.79E-01	-2.01	-1.20	0.81	11.37	11.27	2.81	2022-02-06
CSTF2_2_HepG2	CSTF2	Cstf2	2.72	-0.18	-1.79E-01	-2.01	-1.20	0.81	11.37	11.27	2.81	2022-02-06
CSTF2T_1_HepG2	CSTF2T	Cstf2t	2.77	-0.39	-3.89E-01	-1.37	-1.68	-0.32	2022-02-11	10.79	1.88	3.40
CSTF2T_2_HepG2	CSTF2T	Cstf2t	2.77	-0.39	-3.89E-01	-1.37	-1.68	-0.32	2022-02-11	10.79	1.88	3.40
CSTF2T_1_K652	CSTF2T	Cstf2t	2.77	-0.39	-3.89E-01	-1.37	-1.68	-0.32	2022-02-11	10.79	1.88	3.40
CSTF2T_2_K652	CSTF2T	Cstf2t	2.77	-0.39	-3.89E-01	-1.37	-1.68	-0.32	2022-02-11	10.79	1.88	3.40
DDX24_1_K652	DDX24	Ddx24	1.94	0.12	1.18E-01	-0.80	-0.41	0.39	10.22	10.47	3.70	4.13
DDX24_2_K652	DDX24	Ddx24	1.94	0.12	1.18E-01	-0.80	-0.41	0.39	10.22	10.47	3.70	4.13
DDX3X_1_HepG2	DDX3X	Ddx3x	2.49	-0.32	-3.17E-01	-1.17	-0.71	0.46	2022-01-14	13.89	7.63	7.42
DDX3X_2_HepG2	DDX3X	Ddx3x	2.49	-0.32	-3.17E-01	-1.17	-0.71	0.46	2022-01-14	13.89	7.63	7.42
DDX3X_1_K652	DDX3X	Ddx3x	2.49	-0.32	-3.17E-01	-1.17	-0.71	0.46	2022-01-14	13.89	7.63	7.42
DDX3X_2_K652	DDX3X	Ddx3x	2.49	-0.32	-3.17E-01	-1.17	-0.71	0.46	2022-01-14	13.89	7.63	7.42
DDX42_1_K652	DDX42	Ddx42	2.73	-0.06	-5.80E-02	-0.20	-0.86	-0.66	2022-06-11	10.76	3.54	2.34
DDX42_2_K652	DDX42	Ddx42	2.73	-0.06	-5.80E-02	-0.20	-0.86	-0.66	2022-06-11	10.76	3.54	2.34
DDX55_1_HepG2	DDX55	Ddx55	1.68	0.00	1.50E-03	0.23	-0.43	-0.66	6.36	6.51	0.50	0.00
DDX55_2_HepG2	DDX55	Ddx55	1.68	0.00	1.50E-03	0.23	-0.43	-0.66	6.36	6.51	0.50	0.00
DDX55_1_K652	DDX55	Ddx55	1.68	0.00	1.50E-03	0.23	-0.43	-0.66	6.36	6.51	0.50	0.00
DDX55_2_K652	DDX55	Ddx55	1.68	0.00	1.50E-03	0.23	-0.43	-0.66	6.36	6.51	0.50	0.00
DDX59_1_HepG2	DDX59	Ddx59	1.61	0.15	1.51E-01	0.29	-0.39	-0.67	8.51	8.67	1.91	0.80
DDX59_2_HepG2	DDX59	Ddx59	1.61	0.15	1.51E-01	0.29	-0.39	-0.67	8.51	8.67	1.91	0.80
DDX6_1_HepG2	DDX6	Ddx6	2022-01-02	0.19	1.93E-01	2022-10-01	0.68	-0.41	4.22	6.95	2022-01-01	0.50
DDX6_2_HepG2	DDX6	Ddx6	2022-01-02	0.19	1.93E-01	2022-10-01	0.68	-0.41	4.22	6.95	2022-01-01	0.50
DDX6_1_K652	DDX6	Ddx6	2022-01-02	0.19	1.93E-01	2022-10-01	0.68	-0.41	4.22	6.95	2022-01-01	0.50
DDX6_2_K652	DDX6	Ddx6	2022-01-02	0.19	1.93E-01	2022-10-01	0.68	-0.41	4.22	6.95	2022-01-01	0.50
DGCR8_1_K652	DGCR8	Dgcr8	2022-05-02	0.05	4.78E-02	1.66	0.84	-0.83	8.50	2022-07-09	4.17	1.17
DGCR8_2_K652	DGCR8	Dgcr8	2022-05-02	0.05	4.78E-02	1.66	0.84	-0.83	8.50	2022-07-09	4.17	1.17
DHX30_1_HepG2	DHX30	Dhx30	1.74	0.22	2.21E-01	1.51	1.16	-0.35	10.97	11.36	6.60	4.36
DHX30_2_HepG2	DHX30	Dhx30	1.74	0.22	2.21E-01	1.51	1.16	-0.35	10.97	11.36	6.60	4.36
DHX30_1_K652	DHX30	Dhx30	1.74	0.22	2.21E-01	1.51	1.16	-0.35	10.97	11.36	6.60	4.36
DHX30_2_K652	DHX30	Dhx30	1.74	0.22	2.21E-01	1.51	1.16	-0.35	10.97	11.36	6.60	4.36
DKC1_1_HepG2	DKC1	Dkc1	2022-11-02	-0.42	-4.19E-01	0.01	0.58	0.57	6.68	6.41	2022-06-02	1.65
DKC1_2_HepG2	DKC1	Dkc1	2022-11-02	-0.42	-4.19E-01	0.01	0.58	0.57	6.68	6.41	2022-06-02	1.65
DROSHA_1_K652	DROSHA	Drosha	2.31	NA	NA	NA	NA	NA	NA	NA	NA	NA
DROSHA_2_K652	DROSHA	Drosha	2.31	NA	NA	NA	NA	NA	NA	NA	NA	NA
EFTUD2_1_HepG2	EFTUD2	Eftud2	2022-09-02	0.15	1.49E-01	0.68	0.32	-0.36	8.63	8.93	2.30	1.67
EFTUD2_2_HepG2	EFTUD2	Eftud2	2022-09-02	0.15	1.49E-01	0.68	0.32	-0.36	8.63	8.93	2.30	1.67
EFTUD2_1_K652	EFTUD2	Eftud2	2022-09-02	0.15	1.49E-01	0.68	0.32	-0.36	8.63	8.93	2.30	1.67
EFTUD2_2_K652	EFTUD2	Eftud2	2022-09-02	0.15	1.49E-01	0.68	0.32	-0.36	8.63	8.93	2.30	1.67
EIF3D_1_HepG2	EIF3D	Eif3d	2.16	-0.17	-1.68E-01	-0.66	0.52	1.19	9.87	9.81	4.22	5.21
EIF3D_2_HepG2	EIF3D	Eif3d	2.16	-0.17	-1.68E-01	-0.66	0.52	1.19	9.87	9.81	4.22	5.21
EIF4E_iClip	EIF4E	EIF4E	NA	-0.23	-2.31E-01	1.26	0.78	-0.47	12.44	12.51	8.31	5.41
EIF4G2_1_K652	EIF4G2	Eif4g2	2.13	-0.04	-4.08E-02	-0.23	0.36	0.58	15.35	15.42	10.35	2022-06-10
EIF4G2_2_K652	EIF4G2	Eif4g2	2.13	-0.04	-4.08E-02	-0.23	0.36	0.58	15.35	15.42	10.35	2022-06-10
EWSR1_1_K652	EWSR1	Ewsr1	3.71	-0.04	-4.06E-02	-0.90	-0.53	0.37	10.95	10.98	3.17	2022-05-04
EWSR1_2_K652	EWSR1	Ewsr1	3.71	-0.04	-4.06E-02	-0.90	-0.53	0.37	10.95	10.98	3.17	2022-05-04
FAM120A_1_HepG2	FAM120A	Fam120a	2.56	-0.73	-7.34E-01	-0.39	0.42	0.81	13.22	12.67	8.40	7.29
FAM120A_2_HepG2	FAM120A	Fam120a	2.56	-0.73	-7.34E-01	-0.39	0.42	0.81	13.22	12.67	8.40	7.29
FAM120A_1_K652	FAM120A	Fam120a	2.56	-0.73	-7.34E-01	-0.39	0.42	0.81	13.22	12.67	8.40	7.29
FAM120A_2_K652	FAM120A	Fam120a	2.56	-0.73	-7.34E-01	-0.39	0.42	0.81	13.22	12.67	8.40	7.29
FASTKD2_1_HepG2	FASTKD2	Fastkd2	1.64	0.20	1.96E-01	-2.19	-0.52	1.67	5.47	5.81	0.00	2.42
FASTKD2_2_HepG2	FASTKD2	Fastkd2	1.64	0.20	1.96E-01	-2.19	-0.52	1.67	5.47	5.81	0.00	2.42
FASTKD2_1_K652	FASTKD2	Fastkd2	1.64	0.20	1.96E-01	-2.19	-0.52	1.67	5.47	5.81	0.00	2.42
FASTKD2_2_K652	FASTKD2	Fastkd2	1.64	0.20	1.96E-01	-2.19	-0.52	1.67	5.47	5.81	0.00	2.42
FKBP4_1_HepG2	FKBP4	Fkbp4	2022-12-02	0.06	6.20E-02	0.30	-0.49	-0.78	7.65	2022-01-08	0.80	0.50
FKBP4_2_HepG2	FKBP4	Fkbp4	2022-12-02	0.06	6.20E-02	0.30	-0.49	-0.78	7.65	2022-01-08	0.80	0.50
FMR1_1_K652	FMR1	Fmr1	2.57	-0.18	-1.81E-01	0.87	0.33	-0.53	10.47	10.49	4.21	2.67
FMR1_2_K652	FMR1	Fmr1	2.57	-0.18	-1.81E-01	0.87	0.33	-0.53	10.47	10.49	4.21	2.67
FTO_1_K652	FTO	Fto	0.15	0.28	2.81E-01	0.98	0.50	-0.49	9.54	9.89	3.98	2022-01-02
FTO_2_K652	FTO	Fto	0.15	0.28	2.81E-01	0.98	0.50	-0.49	9.54	9.89	3.98	2022-01-02
FUBP3_1_HepG2	FUBP3	Fubp3	2022-08-02	-0.49	-4.90E-01	-1.14	-0.74	0.40	9.80	9.63	1.51	3.29
FUBP3_2_HepG2	FUBP3	Fubp3	2022-08-02	-0.49	-4.90E-01	-1.14	-0.74	0.40	9.80	9.63	1.51	3.29
FUS_iClip	FUS	Fus	2022-02-04	-0.27	-2.66E-01	-0.50	-0.99	-0.49	8.40	8.89	0.00	1.30
FXR1_1_K652	FXR1	Fxr1	2.41	NA	NA	NA	NA	NA	NA	NA	NA	NA
FXR1_2_K652	FXR1	Fxr1	2.41	NA	NA	NA	NA	NA	NA	NA	NA	NA
FXR2_1_K652	FXR2	Fxr2	2.53	-0.07	-7.16E-02	0.12	0.89	0.76	10.94	2022-02-11	6.50	6.37
FXR2_2_K652	FXR2	Fxr2	2.53	-0.07	-7.16E-02	0.12	0.89	0.76	10.94	2022-02-11	6.50	6.37
GEMIN5_1_K652	GEMIN5	Gemin5	2022-02-02	0.23	2.26E-01	-1.07	-0.41	0.66	6.75	7.00	0.50	1.67
GEMIN5_2_K652	GEMIN5	Gemin5	2022-02-02	0.23	2.26E-01	-1.07	-0.41	0.66	6.75	7.00	0.50	1.67
GNL3_1_K652	GNL3	Gnl3	2022-01-02	-0.80	-7.98E-01	-0.99	-0.34	0.65	11.34	10.69	5.92	5.55
GNL3_2_K652	GNL3	Gnl3	2022-01-02	-0.80	-7.98E-01	-0.99	-0.34	0.65	11.34	10.69	5.92	5.55
GPKOW_1_K652	GPKOW	Gpkow	1.91	-0.20	-1.99E-01	1.99	0.45	-1.54	11.14	2022-06-11	2022-02-06	1.79
GPKOW_2_K652	GPKOW	Gpkow	1.91	-0.20	-1.99E-01	1.99	0.45	-1.54	11.14	2022-06-11	2022-02-06	1.79
GRSF1_1_HepG2	GRSF1	Grsf1	2022-01-02	0.01	7.80E-03	1.20	0.40	-0.80	11.79	2022-01-12	5.88	4.55
GRSF1_2_HepG2	GRSF1	Grsf1	2022-01-02	0.01	7.80E-03	1.20	0.40	-0.80	11.79	2022-01-12	5.88	4.55
GRWD1_1_HepG2	GRWD1	Grwd1	2022-09-01	0.48	4.78E-01	0.23	-0.63	-0.86	9.50	2022-04-10	1.80	2022-01-02
GRWD1_2_HepG2	GRWD1	Grwd1	2022-09-01	0.48	4.78E-01	0.23	-0.63	-0.86	9.50	2022-04-10	1.80	2022-01-02
GTF2F1_1_HepG2	GTF2F1	Gtf2f1	2.37	-0.11	-1.07E-01	-1.27	2022-03-02	3.30	7.86	7.92	5.76	6.35
GTF2F1_2_HepG2	GTF2F1	Gtf2f1	2.37	-0.11	-1.07E-01	-1.27	2022-03-02	3.30	7.86	7.92	5.76	6.35
GTF2F1_1_K652	GTF2F1	Gtf2f1	2.37	-0.11	-1.07E-01	-1.27	2022-03-02	3.30	7.86	7.92	5.76	6.35
GTF2F1_2_K652	GTF2F1	Gtf2f1	2.37	-0.11	-1.07E-01	-1.27	2022-03-02	3.30	7.86	7.92	5.76	6.35
HLTF_1_K652	HLTF	Hltf	1.81	-0.34	-3.44E-01	-0.10	-0.47	-0.36	8.78	8.53	1.51	1.66
HLTF_2_K652	HLTF	Hltf	1.81	-0.34	-3.44E-01	-0.10	-0.47	-0.36	8.78	8.53	1.51	1.66
HNRNPA1_1_HepG2	HNRNPA1	Hnrnpa1	3.83	-0.05	-5.01E-02	-0.33	-0.79	-0.46	10.38	10.44	2.86	3.46
HNRNPA1_2_HepG2	HNRNPA1	Hnrnpa1	3.83	-0.05	-5.01E-02	-0.33	-0.79	-0.46	10.38	10.44	2.86	3.46
HNRNPA1_1_K652	HNRNPA1	Hnrnpa1	3.83	-0.05	-5.01E-02	-0.33	-0.79	-0.46	10.38	10.44	2.86	3.46
HNRNPA1_2_K652	HNRNPA1	Hnrnpa1	3.83	-0.05	-5.01E-02	-0.33	-0.79	-0.46	10.38	10.44	2.86	3.46
HNRNPC_1_HepG2	HNRNPC	HNRNPC	2.63	-0.25	-2.49E-01	1.66	0.45	-1.21	2022-09-13	2022-12-13	9.33	5.57
HNRNPC_2_HepG2	HNRNPC	HNRNPC	2.63	-0.25	-2.49E-01	1.66	0.45	-1.21	2022-09-13	2022-12-13	9.33	5.57
HNRNPC_iClip	HNRNPC	HNRNPC	2.63	-0.25	-2.49E-01	1.66	0.45	-1.21	2022-09-13	2022-12-13	9.33	5.57
HNRNPK_1_HepG2	HNRNPK	Hnrnpk	2.71	-0.25	-2.45E-01	0.57	-0.33	-0.90	15.22	15.21	10.43	8.22
HNRNPK_2_HepG2	HNRNPK	Hnrnpk	2.71	-0.25	-2.45E-01	0.57	-0.33	-0.90	15.22	15.21	10.43	8.22
HNRNPK_1_K652	HNRNPK	Hnrnpk	2.71	-0.25	-2.45E-01	0.57	-0.33	-0.90	15.22	15.21	10.43	8.22
HNRNPK_2_K652	HNRNPK	Hnrnpk	2.71	-0.25	-2.45E-01	0.57	-0.33	-0.90	15.22	15.21	10.43	8.22
HNRNPL_iClip	HNRNPL	HNRNPL	2.79	0.26	2.64E-01	-1.16	-0.52	0.64	5.87	2022-04-06	0.00	1.59
HNRNPM_1_HepG2	HNRNPM	Hnrnpm	3.42	-0.55	-5.52E-01	-0.11	-0.52	-0.41	5.98	6.56	0.00	0.50
HNRNPM_2_HepG2	HNRNPM	Hnrnpm	3.42	-0.55	-5.52E-01	-0.11	-0.52	-0.41	5.98	6.56	0.00	0.50
HNRNPM_1_K652	HNRNPM	Hnrnpm	3.42	-0.55	-5.52E-01	-0.11	-0.52	-0.41	5.98	6.56	0.00	0.50
HNRNPM_2_K652	HNRNPM	Hnrnpm	3.42	-0.55	-5.52E-01	-0.11	-0.52	-0.41	5.98	6.56	0.00	0.50
HNRNPU_1_HepG2	HNRNPU	Hnrnpu	2.78	-0.16	-1.60E-01	1.73	0.91	-0.83	8.56	9.15	4.37	1.17
HNRNPU_2_HepG2	HNRNPU	Hnrnpu	2.78	-0.16	-1.60E-01	1.73	0.91	-0.83	8.56	9.15	4.37	1.17
HNRNPU_1_K652	HNRNPU	Hnrnpu	2.78	-0.16	-1.60E-01	1.73	0.91	-0.83	8.56	9.15	4.37	1.17
HNRNPUL1_1_HepG2	HNRNPUL1	Hnrnpul1	2.97	0.09	9.27E-02	0.87	0.34	-0.53	8.21	8.76	2.41	1.17
HNRNPUL1_2_HepG2	HNRNPUL1	Hnrnpul1	2.97	0.09	9.27E-02	0.87	0.34	-0.53	8.21	8.76	2.41	1.17
HNRNPUL1_1_K652	HNRNPUL1	Hnrnpul1	2.97	0.09	9.27E-02	0.87	0.34	-0.53	8.21	8.76	2.41	1.17
HNRNPUL1_2_K652	HNRNPUL1	Hnrnpul1	2.97	0.09	9.27E-02	0.87	0.34	-0.53	8.21	8.76	2.41	1.17
ELAVL1_iClip	ELAVL1	Elavl1	2.45	0.33	3.28E-01	2.17	1.66	-0.51	5.56	5.94	2.68	0.00
IGF2BP1_1_HepG2	IGF2BP1	Igf2bp1	2.29	NA	NA	NA	NA	NA	NA	NA	NA	NA
IGF2BP1_2_HepG2	IGF2BP1	Igf2bp1	2.29	NA	NA	NA	NA	NA	NA	NA	NA	NA
IGF2BP1_1_K652	IGF2BP1	Igf2bp1	2.29	NA	NA	NA	NA	NA	NA	NA	NA	NA
IGF2BP1_2_K652	IGF2BP1	Igf2bp1	2.29	NA	NA	NA	NA	NA	NA	NA	NA	NA
IGF2BP1_iClip	IGF2BP1	Igf2bp1	2.29	NA	NA	NA	NA	NA	NA	NA	NA	NA
IGF2BP2_1_K652	IGF2BP2	Igf2bp2	NA	0.51	5.11E-01	NA	NA	NA	NA	NA	NA	NA
IGF2BP2_2_K652	IGF2BP2	Igf2bp2	NA	0.51	5.11E-01	NA	NA	NA	NA	NA	NA	NA
IGF2BP2_iClip	IGF2BP2	Igf2bp2	NA	0.51	5.11E-01	NA	NA	NA	NA	NA	NA	NA
IGF2BP3_1_HepG2	IGF2BP3	Igf2bp3	2.19	-0.25	-2.55E-01	-1.00	-2.03	-1.03	10.22	2022-11-10	1.51	2.80
IGF2BP3_2_HepG2	IGF2BP3	Igf2bp3	2.19	-0.25	-2.55E-01	-1.00	-2.03	-1.03	10.22	2022-11-10	1.51	2.80
ILF3_1_HepG2	ILF3	Ilf3	2022-06-02	-0.17	-1.69E-01	0.80	0.31	-0.49	8.61	8.62	2.39	1.30
ILF3_2_HepG2	ILF3	Ilf3	2022-06-02	-0.17	-1.69E-01	0.80	0.31	-0.49	8.61	8.62	2.39	1.30
ILF3_1_K652	ILF3	Ilf3	2022-06-02	-0.17	-1.69E-01	0.80	0.31	-0.49	8.61	8.62	2.39	1.30
ILF3_2_K652	ILF3	Ilf3	2022-06-02	-0.17	-1.69E-01	0.80	0.31	-0.49	8.61	8.62	2.39	1.30
KHDRBS1_1_K652	KHDRBS1	Khdrbs1	2.79	-0.32	-3.17E-01	-1.81	-0.80	2022-01-01	9.13	8.92	1.30	3.85
KHDRBS1_2_K652	KHDRBS1	Khdrbs1	2.79	-0.32	-3.17E-01	-1.81	-0.80	2022-01-01	9.13	8.92	1.30	3.85
KHSRP_1_K652	KHSRP	Khsrp	3.34	0.59	5.90E-01	-1.58	-0.50	2022-08-01	7.18	7.99	0.76	2.98
KHSRP_2_K652	KHSRP	Khsrp	3.34	0.59	5.90E-01	-1.58	-0.50	2022-08-01	7.18	7.99	0.76	2.98
LARP4_1_HepG2	LARP4	Larp4b	2.49	-0.23	-2.25E-01	1.13	0.56	-0.57	10.84	10.24	5.25	2.42
LARP4_2_HepG2	LARP4	Larp4b	2.49	-0.23	-2.25E-01	1.13	0.56	-0.57	10.84	10.24	5.25	2.42
LARP4_1_K652	LARP4	Larp4b	2.49	-0.23	-2.25E-01	1.13	0.56	-0.57	10.84	10.24	5.25	2.42
LARP4_2_K652	LARP4	Larp4b	2.49	-0.23	-2.25E-01	1.13	0.56	-0.57	10.84	10.24	5.25	2.42
LARP7_1_HepG2	LARP7	Larp7	2022-09-02	-0.18	-1.76E-01	1.18	0.73	-0.45	11.81	11.79	2022-03-07	4.22
LARP7_2_HepG2	LARP7	Larp7	2022-09-02	-0.18	-1.76E-01	1.18	0.73	-0.45	11.81	11.79	2022-03-07	4.22
LARP7_1_K652	LARP7	Larp7	2022-09-02	-0.18	-1.76E-01	1.18	0.73	-0.45	11.81	11.79	2022-03-07	4.22
LARP7_2_K652	LARP7	Larp7	2022-09-02	-0.18	-1.76E-01	1.18	0.73	-0.45	11.81	11.79	2022-03-07	4.22
LIN28B_1_HepG2	LIN28B	Lin28b	2.17	0.24	2.40E-01	-0.10	-0.81	-0.71	8.38	8.83	2022-01-01	1.17
LIN28B_2_HepG2	LIN28B	Lin28b	2.17	0.24	2.40E-01	-0.10	-0.81	-0.71	8.38	8.83	2022-01-01	1.17
LIN28B_1_K652	LIN28B	Lin28b	2.17	0.24	2.40E-01	-0.10	-0.81	-0.71	8.38	8.83	2022-01-01	1.17
LIN28B_2_K652	LIN28B	Lin28b	2.17	0.24	2.40E-01	-0.10	-0.81	-0.71	8.38	8.83	2022-01-01	1.17
LSM11_1_HepG2	LSM11	Lsm11	1.95	-0.36	-3.64E-01	1.57	0.89	-0.68	8.98	8.80	4.32	0.80
LSM11_2_HepG2	LSM11	Lsm11	1.95	-0.36	-3.64E-01	1.57	0.89	-0.68	8.98	8.80	4.32	0.80
LSM11_1_K652	LSM11	Lsm11	1.95	-0.36	-3.64E-01	1.57	0.89	-0.68	8.98	8.80	4.32	0.80
LSM11_2_K652	LSM11	Lsm11	1.95	-0.36	-3.64E-01	1.57	0.89	-0.68	8.98	8.80	4.32	0.80
MATR3_iClip	MATR3	Matr3	2022-03-02	-0.01	-1.17E-02	0.87	0.43	-0.44	8.75	8.97	2.84	1.41
METAP2_1_K652	METAP2	Metap2	2.15	-0.18	-1.84E-01	-1.29	-0.38	0.90	11.71	11.78	5.70	7.52
METAP2_2_K652	METAP2	Metap2	2.15	-0.18	-1.84E-01	-1.29	-0.38	0.90	11.71	11.78	5.70	7.52
MTPAP_1_K652	MTPAP	Mtpap	1.73	-0.21	-2.09E-01	2022-12-01	0.61	-0.51	5.64	5.45	1.30	0.00
MTPAP_2_K652	MTPAP	Mtpap	1.73	-0.21	-2.09E-01	2022-12-01	0.61	-0.51	5.64	5.45	1.30	0.00
NCBP2_1_HepG2	NCBP2	Ncbp2	2.42	0.13	1.29E-01	0.98	-0.72	-1.69	11.75	2022-04-12	5.75	4.55
NCBP2_2_HepG2	NCBP2	Ncbp2	2.42	0.13	1.29E-01	0.98	-0.72	-1.69	11.75	2022-04-12	5.75	4.55
NCBP2_1_K652	NCBP2	Ncbp2	2.42	0.13	1.29E-01	0.98	-0.72	-1.69	11.75	2022-04-12	5.75	4.55
NCBP2_2_K652	NCBP2	Ncbp2	2.42	0.13	1.29E-01	0.98	-0.72	-1.69	11.75	2022-04-12	5.75	4.55
NKRF_1_HepG2	NKRF	Nkrf	2.22	NA	NA	NA	NA	NA	NA	NA	NA	NA
NKRF_2_HepG2	NKRF	Nkrf	2.22	NA	NA	NA	NA	NA	NA	NA	NA	NA
NOL12_1_HepG2	NOL12	Nol12	1.61	-0.08	-8.14E-02	-1.33	-0.31	2022-02-01	5.41	5.49	0.80	2.30
NOL12_2_HepG2	NOL12	Nol12	1.61	-0.08	-8.14E-02	-1.33	-0.31	2022-02-01	5.41	5.49	0.80	2.30
NONO_1_K652	NONO	Nono	2022-04-02	0.04	4.37E-02	-0.23	-1.05	-0.82	14.55	14.76	7.53	7.24
NONO_2_K652	NONO	Nono	2022-04-02	0.04	4.37E-02	-0.23	-1.05	-0.82	14.55	14.76	7.53	7.24
NPM1_1_K652	NPM1	Npm1	2.46	-0.29	-2.87E-01	0.49	1.52	2022-03-01	9.81	9.72	7.39	5.35
NPM1_2_K652	NPM1	Npm1	2.46	-0.29	-2.87E-01	0.49	1.52	2022-03-01	9.81	9.72	7.39	5.35
NSUN2_1_K652	NSUN2	Nsun2	1.97	-0.31	-3.15E-01	-1.05	-0.40	0.64	12.27	12.23	5.91	6.88
NSUN2_2_K652	NSUN2	Nsun2	1.97	-0.31	-3.15E-01	-1.05	-0.40	0.64	12.27	12.23	5.91	6.88
NSUN2_iClip	NSUN2	Nsun2	1.97	-0.31	-3.15E-01	-1.05	-0.40	0.64	12.27	12.23	5.91	6.88
PCBP2_1_HepG2	PCBP2	Pcbp2	2.66	-0.12	-1.19E-01	1.71	2022-11-01	-0.60	9.51	9.19	6.43	1.95
PCBP2_2_HepG2	PCBP2	Pcbp2	2.66	-0.12	-1.19E-01	1.71	2022-11-01	-0.60	9.51	9.19	6.43	1.95
PPIG_1_HepG2	PPIG	Ppig	2.36	0.04	3.96E-02	-1.18	-0.35	0.83	8.46	8.35	2022-01-02	3.29
PPIG_2_HepG2	PPIG	Ppig	2.36	0.04	3.96E-02	-1.18	-0.35	0.83	8.46	8.35	2022-01-02	3.29
PPIL4_1_K652	PPIL4	Ppil4	2022-08-02	-0.06	-6.22E-02	1.28	0.74	-0.54	4.96	5.30	2022-01-01	0.00
PPIL4_2_K652	PPIL4	Ppil4	2022-08-02	-0.06	-6.22E-02	1.28	0.74	-0.54	4.96	5.30	2022-01-01	0.00
PRPF8_1_HepG2	PRPF8	Prpf8	2022-05-02	0.44	4.40E-01	-1.22	-0.48	0.74	11.20	11.79	2022-10-04	6.20
PRPF8_2_HepG2	PRPF8	Prpf8	2022-05-02	0.44	4.40E-01	-1.22	-0.48	0.74	11.20	11.79	2022-10-04	6.20
PRPF8_1_K652	PRPF8	Prpf8	2022-05-02	0.44	4.40E-01	-1.22	-0.48	0.74	11.20	11.79	2022-10-04	6.20
PRPF8_2_K652	PRPF8	Prpf8	2022-05-02	0.44	4.40E-01	-1.22	-0.48	0.74	11.20	11.79	2022-10-04	6.20
PTB_iClip	PTBP1	Ptbp1	2.36	1.42	1.42E+00	-0.65	1.15	1.80	8.26	9.86	2022-05-05	6.26
PTBP1_1_HepG2	PTBP1	Ptbp1	2.36	1.42	1.42E+00	-0.65	1.15	1.80	8.26	9.86	2022-05-05	6.26
PTBP1_2_HepG2	PTBP1	Ptbp1	2.36	1.42	1.42E+00	-0.65	1.15	1.80	8.26	9.86	2022-05-05	6.26
PTBP1_1_K652	PTBP1	Ptbp1	2.36	1.42	1.42E+00	-0.65	1.15	1.80	8.26	9.86	2022-05-05	6.26
PTBP1_2_K652	PTBP1	Ptbp1	2.36	1.42	1.42E+00	-0.65	1.15	1.80	8.26	9.86	2022-05-05	6.26
PUM2_1_K652	PUM2	Pum2	2.52	-0.10	-9.73E-02	-1.96	-1.58	0.39	10.51	2022-08-10	0.29	3.97
PUM2_2_K652	PUM2	Pum2	2.52	-0.10	-9.73E-02	-1.96	-1.58	0.39	10.51	2022-08-10	0.29	3.97
PUS1_1_K652	PUS1	Pus1	2022-01-02	-0.06	-5.87E-02	0.04	0.47	0.43	8.35	8.48	2022-10-03	2.47
PUS1_2_K652	PUS1	Pus1	2022-01-02	-0.06	-5.87E-02	0.04	0.47	0.43	8.35	8.48	2022-10-03	2.47
QKI_1_HepG2	QKI	Qk	2022-12-02	NA	NA	NA	NA	NA	NA	NA	NA	NA
QKI_2_HepG2	QKI	Qk	2022-12-02	NA	NA	NA	NA	NA	NA	NA	NA	NA
QKI_1_K652	QKI	Qk	2022-12-02	NA	NA	NA	NA	NA	NA	NA	NA	NA
QKI_2_K652	QKI	Qk	2022-12-02	NA	NA	NA	NA	NA	NA	NA	NA	NA
RBFOX2_1_HepG2	RBFOX2	Rbfox2	2.59	-0.24	-2.44E-01	-1.31	-0.77	0.54	7.69	7.58	0.00	1.96
RBFOX2_2_HepG2	RBFOX2	Rbfox2	2.59	-0.24	-2.44E-01	-1.31	-0.77	0.54	7.69	7.58	0.00	1.96
RBFOX2_1_K652	RBFOX2	Rbfox2	2.59	-0.24	-2.44E-01	-1.31	-0.77	0.54	7.69	7.58	0.00	1.96
RBFOX2_2_K652	RBFOX2	Rbfox2	2.59	-0.24	-2.44E-01	-1.31	-0.77	0.54	7.69	7.58	0.00	1.96
RBM15_1_HepG2	RBM15	Rbm15	2.56	NA	NA	NA	NA	NA	NA	NA	NA	NA
RBM15_2_HepG2	RBM15	Rbm15	2.56	NA	NA	NA	NA	NA	NA	NA	NA	NA
RBM15_1_K652	RBM15	Rbm15	2.56	NA	NA	NA	NA	NA	NA	NA	NA	NA
RBM15_2_K652	RBM15	Rbm15	2.56	NA	NA	NA	NA	NA	NA	NA	NA	NA
RBM22_1_HepG2	RBM22	Rbm22	2.42	-0.09	-8.93E-02	1.13	0.61	-0.52	9.71	9.76	2022-01-05	2.21
RBM22_2_HepG2	RBM22	Rbm22	2.42	-0.09	-8.93E-02	1.13	0.61	-0.52	9.71	9.76	2022-01-05	2.21
RBM22_1_K652	RBM22	Rbm22	2.42	-0.09	-8.93E-02	1.13	0.61	-0.52	9.71	9.76	2022-01-05	2.21
RBM22_2_K652	RBM22	Rbm22	2.42	-0.09	-8.93E-02	1.13	0.61	-0.52	9.71	9.76	2022-01-05	2.21
RBM27_1_K652	RBM27	Rbm27	2.41	-0.41	-4.08E-01	1.15	0.50	-0.66	6.19	6.27	1.50	0.00
RBM27_2_K652	RBM27	Rbm27	2.41	-0.41	-4.08E-01	1.15	0.50	-0.66	6.19	6.27	1.50	0.00
RPS11_1_K652	RPS11	Rps11	2.54	0.43	4.28E-01	-0.24	2022-01-02	2.24	2022-05-11	11.64	12.39	12.17
RPS11_2_K652	RPS11	Rps11	2.54	0.43	4.28E-01	-0.24	2022-01-02	2.24	2022-05-11	11.64	12.39	12.17
RPS5_1_HepG2	RPS5	Rps5	2.27	0.42	4.19E-01	0.07	2022-11-01	2022-03-01	11.86	12.44	10.29	10.53
RPS5_2_HepG2	RPS5	Rps5	2.27	0.42	4.19E-01	0.07	2022-11-01	2022-03-01	11.86	12.44	10.29	10.53
RPS5_1_K652	RPS5	Rps5	2.27	0.42	4.19E-01	0.07	2022-11-01	2022-03-01	11.86	12.44	10.29	10.53
RPS5_2_K652	RPS5	Rps5	2.27	0.42	4.19E-01	0.07	2022-11-01	2022-03-01	11.86	12.44	10.29	10.53
SAFB2_1_K652	SAFB2	Safb	2.71	-0.41	-4.14E-01	-0.30	0.32	0.62	9.15	8.89	3.30	3.00
SAFB2_2_K652	SAFB2	Safb	2.71	-0.41	-4.14E-01	-0.30	0.32	0.62	9.15	8.89	3.30	3.00
SBDS_1_K652	SBDS	Sbds	1.82	-0.34	-3.42E-01	-1.24	-0.81	0.43	13.51	13.32	6.81	8.46
SBDS_2_K652	SBDS	Sbds	1.82	-0.34	-3.42E-01	-1.24	-0.81	0.43	13.51	13.32	6.81	8.46
SERBP1_1_K652	SERBP1	Serbp1	2022-03-03	-0.23	-2.27E-01	-1.27	-0.70	0.56	10.46	10.56	2.57	4.73
SERBP1_2_K652	SERBP1	Serbp1	2022-03-03	-0.23	-2.27E-01	-1.27	-0.70	0.56	10.46	10.56	2.57	4.73
SF3A3_1_HepG2	SF3A3	Sf3a3	1.72	0.17	1.75E-01	1.19	0.36	-0.83	9.73	2022-09-10	3.95	2.30
SF3A3_2_HepG2	SF3A3	Sf3a3	1.72	0.17	1.75E-01	1.19	0.36	-0.83	9.73	2022-09-10	3.95	2.30
SF3B1_1_K652	SF3B1	Sf3b1	2.24	-0.16	-1.64E-01	-1.63	-0.45	1.18	7.28	6.38	2022-01-01	2.48
SF3B1_2_K652	SF3B1	Sf3b1	2.24	-0.16	-1.64E-01	-1.63	-0.45	1.18	7.28	6.38	2022-01-01	2.48
SF3B4_1_HepG2	SF3B4	Sf3b4	2.89	0.51	5.09E-01	1.89	0.52	-1.38	11.52	12.13	2022-11-07	3.89
SF3B4_2_HepG2	SF3B4	Sf3b4	2.89	0.51	5.09E-01	1.89	0.52	-1.38	11.52	12.13	2022-11-07	3.89
SF3B4_1_K652	SF3B4	Sf3b4	2.89	0.51	5.09E-01	1.89	0.52	-1.38	11.52	12.13	2022-11-07	3.89
SF3B4_2_K652	SF3B4	Sf3b4	2.89	0.51	5.09E-01	1.89	0.52	-1.38	11.52	12.13	2022-11-07	3.89
SFPQ_1_HepG2	SFPQ	Sfpq	2022-06-03	-0.19	-1.94E-01	-1.60	-0.69	0.91	11.86	11.87	3.82	6.72
SFPQ_2_HepG2	SFPQ	Sfpq	2022-06-03	-0.19	-1.94E-01	-1.60	-0.69	0.91	11.86	11.87	3.82	6.72
SLBP_1_K652	SLBP	Slbp	2.44	-0.79	-7.95E-01	-0.78	-1.38	-0.61	2022-05-11	10.38	2.71	2.93
SLBP_2_K652	SLBP	Slbp	2.44	-0.79	-7.95E-01	-0.78	-1.38	-0.61	2022-05-11	10.38	2.71	2.93
SLTM_1_HepG2	SLTM	Sltm	2.71	-0.16	-1.61E-01	-0.20	0.32	0.53	11.76	11.75	6.24	6.32
SLTM_2_HepG2	SLTM	Sltm	2.71	-0.16	-1.61E-01	-0.20	0.32	0.53	11.76	11.75	6.24	6.32
SLTM_1_K652	SLTM	Sltm	2.71	-0.16	-1.61E-01	-0.20	0.32	0.53	11.76	11.75	6.24	6.32
SLTM_2_K652	SLTM	Sltm	2.71	-0.16	-1.61E-01	-0.20	0.32	0.53	11.76	11.75	6.24	6.32
SNRBP_iClip	SNRPB	Snrpn	2022-06-02	-0.19	-1.88E-01	1.80	0.87	-0.93	2022-08-09	2022-11-09	5.83	2022-01-01
SMNDC1_1_HepG2	SMNDC1	Smndc1	1.86	0.02	1.83E-02	2022-02-01	0.45	-0.58	9.16	9.34	3.92	1.88
SMNDC1_2_HepG2	SMNDC1	Smndc1	1.86	0.02	1.83E-02	2022-02-01	0.45	-0.58	9.16	9.34	3.92	1.88
SMNDC1_1_K652	SMNDC1	Smndc1	1.86	0.02	1.83E-02	2022-02-01	0.45	-0.58	9.16	9.34	3.92	1.88
SMNDC1_2_K652	SMNDC1	Smndc1	1.86	0.02	1.83E-02	2022-02-01	0.45	-0.58	9.16	9.34	3.92	1.88
SND1_1_HepG2	SND1	Snd1	2022-12-02	-0.13	-1.33E-01	-0.99	-0.68	0.30	11.32	11.18	3.99	4.58
SND1_2_HepG2	SND1	Snd1	2022-12-02	-0.13	-1.33E-01	-0.99	-0.68	0.30	11.32	11.18	3.99	4.58
SND1_1_K652	SND1	Snd1	2022-12-02	-0.13	-1.33E-01	-0.99	-0.68	0.30	11.32	11.18	3.99	4.58
SND1_2_K652	SND1	Snd1	2022-12-02	-0.13	-1.33E-01	-0.99	-0.68	0.30	11.32	11.18	3.99	4.58
SRSF1_1_HepG2	SRSF1	Srsf1	2.96	-0.47	-4.74E-01	-2.00	0.37	2.38	11.41	10.69	5.73	2022-09-07
SRSF1_2_HepG2	SRSF1	Srsf1	2.96	-0.47	-4.74E-01	-2.00	0.37	2.38	11.41	10.69	5.73	2022-09-07
SRSF1_1_K652	SRSF1	Srsf1	2.96	-0.47	-4.74E-01	-2.00	0.37	2.38	11.41	10.69	5.73	2022-09-07
SRSF1_2_K652	SRSF1	Srsf1	2.96	-0.47	-4.74E-01	-2.00	0.37	2.38	11.41	10.69	5.73	2022-09-07
SRSF7_1_HepG2	SRSF7	Srsf7	2.84	-0.08	-8.12E-02	-0.39	-1.44	-1.06	12.68	12.67	2022-02-04	4.51
SRSF7_2_HepG2	SRSF7	Srsf7	2.84	-0.08	-8.12E-02	-0.39	-1.44	-1.06	12.68	12.67	2022-02-04	4.51
SRSF7_1_K652	SRSF7	Srsf7	2.84	-0.08	-8.12E-02	-0.39	-1.44	-1.06	12.68	12.67	2022-02-04	4.51
SRSF7_2_K652	SRSF7	Srsf7	2.84	-0.08	-8.12E-02	-0.39	-1.44	-1.06	12.68	12.67	2022-02-04	4.51
SRSF9_1_HepG2	SRSF9	Srsf9	2.56	0.07	7.45E-02	-0.80	0.79	1.59	8.90	9.14	4.58	6.44
SRSF9_2_HepG2	SRSF9	Srsf9	2.56	0.07	7.45E-02	-0.80	0.79	1.59	8.90	9.14	4.58	6.44
STAU1_iClip	STAU1	Stau1	2.27	0.17	1.72E-01	1.37	0.66	-0.71	10.81	2022-03-11	5.81	3.47
SUB1_1_HepG2	SUB1	Sub1	-0.27	-0.08	-7.79E-02	1.97	2.55	0.58	12.75	12.78	10.39	6.72
SUB1_2_HepG2	SUB1	Sub1	-0.27	-0.08	-7.79E-02	1.97	2.55	0.58	12.75	12.78	10.39	6.72
SUGP2_1_HepG2	SUGP2	Sugp2	2.23	0.18	1.81E-01	-2.10	-0.36	1.75	10.37	10.72	3.78	6.40
SUGP2_2_HepG2	SUGP2	Sugp2	2.23	0.18	1.81E-01	-2.10	-0.36	1.75	10.37	10.72	3.78	6.40
SUPV3L1_1_HepG2	SUPV3L1	Supv3l1	1.85	0.18	1.81E-01	-1.84	-0.99	0.84	2022-05-09	9.37	0.80	4.55
SUPV3L1_2_HepG2	SUPV3L1	Supv3l1	1.85	0.18	1.81E-01	-1.84	-0.99	0.84	2022-05-09	9.37	0.80	4.55
TAF15_1_HepG2	TAF15	Taf15	4.22	-0.03	-2.72E-02	0.25	1.41	1.17	2022-01-09	2022-08-09	6.59	5.17
TAF15_2_HepG2	TAF15	Taf15	4.22	-0.03	-2.72E-02	0.25	1.41	1.17	2022-01-09	2022-08-09	6.59	5.17
TAF15_1_K652	TAF15	Taf15	4.22	-0.03	-2.72E-02	0.25	1.41	1.17	2022-01-09	2022-08-09	6.59	5.17
TAF15_2_K652	TAF15	Taf15	4.22	-0.03	-2.72E-02	0.25	1.41	1.17	2022-01-09	2022-08-09	6.59	5.17
TARDBP_1_K652	TARDBP	Tardbp	2.87	0.09	8.93E-02	-1.55	-1.03	0.52	8.81	2022-08-09	0.00	4.00
TARDBP_2_K652	TARDBP	Tardbp	2.87	0.09	8.93E-02	-1.55	-1.03	0.52	8.81	2022-08-09	0.00	4.00
TBRG4_1_HepG2	TBRG4	Tbrg4	1.41	0.39	3.91E-01	1.61	0.81	-0.80	8.27	2022-02-09	4.20	1.30
TBRG4_2_HepG2	TBRG4	Tbrg4	1.41	0.39	3.91E-01	1.61	0.81	-0.80	8.27	2022-02-09	4.20	1.30
TBRG4_1_K652	TBRG4	Tbrg4	1.41	0.39	3.91E-01	1.61	0.81	-0.80	8.27	2022-02-09	4.20	1.30
TBRG4_2_K652	TBRG4	Tbrg4	1.41	0.39	3.91E-01	1.61	0.81	-0.80	8.27	2022-02-09	4.20	1.30
TARDBP_iClip	TARDBP	Tardbp	2.87	0.09	8.93E-02	-1.55	-1.03	0.52	8.81	2022-08-09	0.00	4.00
TIA1_1_HepG2	TIA1	Tia1	2.79	0.23	2.34E-01	1.00	0.56	-0.45	2022-06-08	7.96	3.81	2022-01-01
TIA1_2_HepG2	TIA1	Tia1	2.79	0.23	2.34E-01	1.00	0.56	-0.45	2022-06-08	7.96	3.81	2022-01-01
TIA1_1_K652	TIA1	Tia1	2.79	0.23	2.34E-01	1.00	0.56	-0.45	2022-06-08	7.96	3.81	2022-01-01
TIA1_2_K652	TIA1	Tia1	2.79	0.23	2.34E-01	1.00	0.56	-0.45	2022-06-08	7.96	3.81	2022-01-01
TIA1_iClip	TIA1	Tia1	2.79	0.23	2.34E-01	1.00	0.56	-0.45	2022-06-08	7.96	3.81	2022-01-01
TIAL1_iClip	TIAL1	Tail1	2.81	NA	NA	NA	NA	NA	NA	NA	NA	NA
TNRC6A_1_K652	TNRC6A	Tnrc6a	3.42	-0.12	-1.18E-01	1.20	0.39	-0.81	10.85	11.16	4.57	2.62
TNRC6A_2_K652	TNRC6A	Tnrc6a	3.42	-0.12	-1.18E-01	1.20	0.39	-0.81	10.85	11.16	4.57	2.62
TRA2A_1_HepG2	TRA2A	Tra2a	2022-05-03	0.31	3.07E-01	0.80	1.63	0.83	11.62	2022-07-12	2022-09-09	7.61
TRA2A_2_HepG2	TRA2A	Tra2a	2022-05-03	0.31	3.07E-01	0.80	1.63	0.83	11.62	2022-07-12	2022-09-09	7.61
TRA2A_1_K652	TRA2A	Tra2a	2022-05-03	0.31	3.07E-01	0.80	1.63	0.83	11.62	2022-07-12	2022-09-09	7.61
TRA2A_2_K652	TRA2A	Tra2a	2022-05-03	0.31	3.07E-01	0.80	1.63	0.83	11.62	2022-07-12	2022-09-09	7.61
RO60_1_HepG2	RO60	RO60	1.81	-0.06	-6.22E-02	-0.73	-0.43	0.30	12.58	12.76	5.83	5.74
RO60_2_HepG2	RO60	RO60	1.81	-0.06	-6.22E-02	-0.73	-0.43	0.30	12.58	12.76	5.83	5.74
RO60_1_K652	RO60	RO60	1.81	-0.06	-6.22E-02	-0.73	-0.43	0.30	12.58	12.76	5.83	5.74
RO60_2_K652	RO60	RO60	1.81	-0.06	-6.22E-02	-0.73	-0.43	0.30	12.58	12.76	5.83	5.74
U2AF1_1_HepG2	U2AF1	U2af1	NA	-0.37	-3.73E-01	-1.76	-1.05	0.71	11.64	11.42	3.83	8.40
U2AF1_2_HepG2	U2AF1	U2af1	NA	-0.37	-3.73E-01	-1.76	-1.05	0.71	11.64	11.42	3.83	8.40
U2AF1_1_K652	U2AF1	U2af1	NA	-0.37	-3.73E-01	-1.76	-1.05	0.71	11.64	11.42	3.83	8.40
U2AF1_2_K652	U2AF1	U2af1	NA	-0.37	-3.73E-01	-1.76	-1.05	0.71	11.64	11.42	3.83	8.40
U2AF2_1_HepG2	U2AF2	U2af2	2022-04-02	0.01	7.72E-03	-1.09	-0.37	0.72	2022-02-12	12.20	2022-08-07	8.23
U2AF2_2_HepG2	U2AF2	U2af2	2022-04-02	0.01	7.72E-03	-1.09	-0.37	0.72	2022-02-12	12.20	2022-08-07	8.23
U2AF2_1_K652	U2AF2	U2af2	2022-04-02	0.01	7.72E-03	-1.09	-0.37	0.72	2022-02-12	12.20	2022-08-07	8.23
U2AF2_2_K652	U2AF2	U2af2	2022-04-02	0.01	7.72E-03	-1.09	-0.37	0.72	2022-02-12	12.20	2022-08-07	8.23
UCHL5_1_HepG2	UCHL5	Uchl5	1.89	-0.11	-1.11E-01	0.61	1.92	1.31	8.13	8.15	6.36	4.38
UCHL5_2_HepG2	UCHL5	Uchl5	1.89	-0.11	-1.11E-01	0.61	1.92	1.31	8.13	8.15	6.36	4.38
UCHL5_1_K652	UCHL5	Uchl5	1.89	-0.11	-1.11E-01	0.61	1.92	1.31	8.13	8.15	6.36	4.38
UCHL5_2_K652	UCHL5	Uchl5	1.89	-0.11	-1.11E-01	0.61	1.92	1.31	8.13	8.15	6.36	4.38
UPF1_1_K652	UPF1	Upf1	2022-04-02	-0.32	-3.23E-01	-0.60	0.39	0.99	4.22	4.34	0.50	1.30
UPF1_2_K652	UPF1	Upf1	2022-04-02	-0.32	-3.23E-01	-0.60	0.39	0.99	4.22	4.34	0.50	1.30
XPO5_1_HepG2	XPO5	Xpo5	1.83	0.54	5.45E-01	1.87	0.38	-1.49	8.16	2022-02-09	2.62	0.00
XPO5_2_HepG2	XPO5	Xpo5	1.83	0.54	5.45E-01	1.87	0.38	-1.49	8.16	2022-02-09	2.62	0.00
XRCC6_1_HepG2	XRCC6	Xrcc6	1.88	0.02	2.49E-02	0.94	0.48	-0.46	8.44	8.63	3.15	1.41
XRCC6_2_HepG2	XRCC6	Xrcc6	1.88	0.02	2.49E-02	0.94	0.48	-0.46	8.44	8.63	3.15	1.41
XRCC6_1_K652	XRCC6	Xrcc6	1.88	0.02	2.49E-02	0.94	0.48	-0.46	8.44	8.63	3.15	1.41
XRCC6_2_K652	XRCC6	Xrcc6	1.88	0.02	2.49E-02	0.94	0.48	-0.46	8.44	8.63	3.15	1.41
XRN2_1_HepG2	XRN2	Xrn2	2.23	0.36	3.62E-01	-0.28	0.31	0.59	7.46	7.90	1.67	2.20
XRN2_2_HepG2	XRN2	Xrn2	2.23	0.36	3.62E-01	-0.28	0.31	0.59	7.46	7.90	1.67	2.20
XRN2_1_K652	XRN2	Xrn2	2.23	0.36	3.62E-01	-0.28	0.31	0.59	7.46	7.90	1.67	2.20
XRN2_2_K652	XRN2	Xrn2	2.23	0.36	3.62E-01	-0.28	0.31	0.59	7.46	7.90	1.67	2.20
YBX3_1_K652	YBX3	Ybx3	2022-09-02	0.93	9.29E-01	-0.47	0.78	1.25	12.13	12.26	9.31	9.36
YBX3_2_K652	YBX3	Ybx3	2022-09-02	0.93	9.29E-01	-0.47	0.78	1.25	12.13	12.26	9.31	9.36
YWHAG_1_K652	YWHAG	Ywhag	1.82	0.21	2.15E-01	1.38	0.41	-0.97	16.68	2022-03-17	12.37	2022-11-11
YWHAG_2_K652	YWHAG	Ywhag	1.82	0.21	2.15E-01	1.38	0.41	-0.97	16.68	2022-03-17	12.37	2022-11-11
ZNF622_1_K652	ZNF622	Znf622	2022-11-02	NA	NA	NA	NA	NA	NA	NA	NA	NA
ZNF622_2_K652	ZNF622	Znf622	2022-11-02	NA	NA	NA	NA	NA	NA	NA	NA	NA
ZRANB2_1_K652	ZRANB2	Zranb2	2.65	-0.13	-1.27E-01	-0.36	-0.92	-0.56	9.22	9.14	2022-01-01	1.91
ZRANB2_2_K652	ZRANB2	Zranb2	2.65	-0.13	-1.27E-01	-0.36	-0.92	-0.56	9.22	9.14	2022-01-01	1.91
Table S6 : Description of the publicly available CLIP sequencing data generated in human cell lines against 126 RBPs. Columns represent: 1- CLIP experiment ID, 2- Human protein symbol of the clipped RNA binding protein (RBP), 3- Rat Rn5 gene symbol of the clipped RBP, 4- Z-score of the propensity of the clipped RBP to localize into cellular condensates as predicted by GraPES (Kuechler et al. 2022…
