# Supplementary material for: The predicted RNA-binding protein regulome of axonal mRNAs
Source: HighWire-hosted journal article supplement (doi:10.1101/gr.277804.123), 2023-08-15
Supplement: Supplemental_Tables.zip [file Supplemental Table S7.xlsx]

## Sheet: Sheet1
Clip	RBP	distance from proximal 3' end [start]	distance from proximal 3' end [end]	distance from distal 3' end [start]	distance from distal 3' end [end]	max P-value in proximal [-log10)]	max P-value in distal [-log10)]			Rn5	Condensate_Zscore	logFC_deg_cb	PVal_deg_cb	diff.transport	transport.ngf	transport.nt3	cb.ngf	cb.nt3	axons.ngf	axons.nt3	ms_ax_1	ms_ax_2	ms_cb_1	ms_cb_2
DDX55_1_K652	DDX55	-250	-200	-250	-200	36.951668	83.33448			Ddx55	1.68	0.00	1.50E-03	0.23	-0.43	-0.66	6.36	6.51	0.50	0.00	NA	NA	NA	NA
CPSF160_iClip	CPSF160	-50	0	-50	0	33.481358	90.58554			Cpsf1	2022-12-02	0.37	3.71E-01	2022-01-01	1.35	0.33	9.21	9.74	6.24	2.79	NA	NA	1.97	1.97
CSTF2_2_HepG2	CSTF2	0	50	0	50	26.706433	99.01778			Cstf2	2.72	-0.18	-1.79E-01	-2.01	-1.20	0.81	11.37	11.27	2.81	2022-02-06	NA	NA	NA	NA
DDX55_2_HepG2	DDX55	-200	-150	-250	-200	26.107601	86.51398			Ddx55	1.68	0.00	1.50E-03	0.23	-0.43	-0.66	6.36	6.51	0.50	0.00	NA	NA	NA	NA
LSM11_2_HepG2	LSM11	-250	-200	-250	-200	24.877626	91.26009			Lsm11	1.95	-0.36	-3.64E-01	1.57	0.89	-0.68	8.98	8.80	4.32	0.80	NA	NA	NA	NA
LARP4_2_HepG2	LARP4	-150	-100	-200	-150	23.830004	94.85916			Larp4b	2.49	-0.23	-2.25E-01	1.13	0.56	-0.57	10.84	10.24	5.25	2.42	NA	NA	2022-07-15	2022-07-15
CSTF2_1_HepG2	CSTF2	0	50	0	50	22.683978	79.93490			Cstf2	2.72	-0.18	-1.79E-01	-2.01	-1.20	0.81	11.37	11.27	2.81	2022-02-06	NA	NA	NA	NA
DDX6_2_K652	DDX6	-250	-200	-200	-150	21.925081	89.10807			Ddx6	2022-10-02	0.19	1.93E-01	2022-10-01	0.68	-0.41	4.22	6.95	2022-01-01	0.50	NA	NA	18.66	18.66
PUM2_1_K652	PUM2	-150	-100	-150	-100	20.424958	80.36780			Pum2	2.52	-0.10	-9.73E-02	-1.96	-1.58	0.39	10.51	2022-08-10	0.29	3.97	NA	NA	4.32	4.32
RBFOX2_1_K652	RBFOX2	-250	-200	-150	-100	18.320137	86.56860			Rbfox2	2.59	-0.24	-2.44E-01	-1.31	-0.77	0.54	7.69	7.58	0.00	1.96	NA	NA	6.41	6.41
CPSF6_2_K652	CPSF6	-250	-200	-100	-50	18.290326	52.41983			Cpsf6	2.89	0.04	4.42E-02	2.42	2022-08-02	-0.35	7.74	2022-12-08	4.77	1.91	NA	NA	9.22	9.22
CSTF2T_1_HepG2	CSTF2T	0	50	0	50	17.758180	61.39509			Cstf2t	2.77	-0.39	-3.89E-01	-1.37	-1.68	-0.32	2022-02-11	10.79	1.88	3.40	NA	NA	NA	NA
LARP4_1_HepG2	LARP4	-150	-100	-350	-300	17.369545	92.32994			Larp4b	2.49	-0.23	-2.25E-01	1.13	0.56	-0.57	10.84	10.24	5.25	2.42	NA	NA	2022-07-15	2022-07-15
HNRNPL_iClip	HNRNPL	-150	-100	-100	-50	16.309086	90.67878			HNRNPL	2.79	0.26	2.64E-01	-1.16	-0.52	0.64	5.87	2022-04-06	0.00	1.59	NA	NA	58.16	58.16
KHSRP_1_K652	KHSRP	-150	-100	-150	-100	15.895720	97.16384			Khsrp	3.34	0.59	5.90E-01	-1.58	-0.50	2022-08-01	7.18	7.99	0.76	2.98	NA	NA	37.25	37.25
TIA1_iClip	TIA1	-250	-200	-200	-150	15.759841	151.74307			Tia1	2.79	0.23	2.34E-01	1.00	0.56	-0.45	2022-06-08	7.96	3.81	2022-01-01	NA	NA	NA	NA
FMR1_2_K652	FMR1	0	50	0	50	15.440967	51.43294			Fmr1	2.57	-0.18	-1.81E-01	0.87	0.33	-0.53	10.47	10.49	4.21	2.67	NA	NA	5.27	5.27
DDX55_1_HepG2	DDX55	-150	-100	-200	-150	15.051682	117.22603			Ddx55	1.68	0.00	1.50E-03	0.23	-0.43	-0.66	6.36	6.51	0.50	0.00	NA	NA	NA	NA
LSM11_1_HepG2	LSM11	-300	-250	-200	-150	14.258593	110.39373			Lsm11	1.95	-0.36	-3.64E-01	1.57	0.89	-0.68	8.98	8.80	4.32	0.80	NA	NA	NA	NA
KHSRP_2_K652	KHSRP	-200	-150	-150	-100	13.686078	94.25815			Khsrp	3.34	0.59	5.90E-01	-1.58	-0.50	2022-08-01	7.18	7.99	0.76	2.98	NA	NA	37.25	37.25
CELF4_iClip	CELF4	-100	-50	-100	-50	12.898599	268.52008			CELF4	2.50	-0.06	-6.05E-02	-1.13	-0.72	0.41	2022-09-11	11.63	4.41	5.85	NA	NA	NA	NA
TIAL1_iClip	TIAL1	-150	-100	-100	-50	12.682375	158.06432			Tail1	2.81	NA	NA	NA	NA	NA	NA	NA	NA	NA	NA	NA	NA	NA
PUM2_2_K652	PUM2	-150	-100	-250	-200	11.186031	81.42584			Pum2	2.52	-0.10	-9.73E-02	-1.96	-1.58	0.39	10.51	2022-08-10	0.29	3.97	NA	NA	4.32	4.32
CSTF2T_2_K652	CSTF2T	0	50	0	50	9.565829	76.62488			Cstf2t	2.77	-0.39	-3.89E-01	-1.37	-1.68	-0.32	2022-02-11	10.79	1.88	3.40	NA	NA	NA	NA
YBX3_2_K652	YBX3	-250	-200	-500	-450	6.516549	95.85284			Ybx3	2.90	0.93	9.29E-01	-0.47	0.78	1.25	12.13	12.26	9.31	9.36	NA	NA	NA	NA
CSTF2T_2_HepG2	CSTF2T	0	50	0	50	6.384401	38.48523			Cstf2t	2.77	-0.39	-3.89E-01	-1.37	-1.68	-0.32	2022-02-11	10.79	1.88	3.40	NA	NA	NA	NA
Table S7 : 17 predicted positive regulators of polyadenylation. Columns represent: 1- CLIP experiment ID, 2- human protein symbol of the clipped RBP, 3- position (start) relative to the promoter-proximal (Ip) 3' end where RBP is most significantly associated with promoter-proximal 3’ UTR isoform relative usage, 4- position (end) relative to the promoter-proximal (Ip) 3' end where RBP is most sign…
