# Supplementary material for: The predicted RNA-binding protein regulome of axonal mRNAs
Source: HighWire-hosted journal article supplement (doi:10.1101/gr.277804.123), 2023-08-15
Supplement: Supplemental_Tables.zip [file Supplemental Table S8.xlsx]

## Sheet: Sheet1
Clip	RBP	distance from 3' end Ip [start]	distance from 3' end Ip [end]	distance from 3' end Id [start]	distance from 3' end Id [end]	log10(P-value) -Ip	log10(P-value) -Id	Cytoplasmic ribonucleoprotein granule	5.10e-08	RBPs	Rn5	Condensate_Zscore	logFC_deg_cb	PVal_deg_cb	diff.transport	transport.ngf	transport.nt3	cb.ngf	cb.nt3	axons.ngf	axons.nt3
TIAL1_iClip	TIAL1	100	150	-100	-50	-29.83222	-158.06432	Mixed, incl. deadenylation-dependent mrna decay, and cytoplasmic stress granule	9.89e-10	TIAL1	Tail1	2.81	NA	NA	NA	NA	NA	NA	NA	NA	NA
TIA1_iClip	TIA1	100	150	-200	-150	-28.92683	-151.74307	Mixed, incl. p-body, and endoribonuclease complex	1.42e-11	TIA1	Tia1	2.79	0.23	2.34E-01	1.00	0.56	-0.45	2022-06-08	7.96	3.81	2022-01-01
EIF4E_iClip	EIF4E	100	150	-100	-50	-29.26112	-129.74172			EIF4E	EIF4E	NA	-0.23	-2.31E-01	1.26	0.78	-0.47	12.44	12.51	8.31	5.41
CELF2_iClip	CELF2	100	150	-100	-50	-10.99814	-126.62656			CELF2	CELF2	2.50	-0.35	-3.53E-01	-1.88	0.33	2.21	6.70	7.16	2022-01-01	4.37
ELAVL1_iClip	ELAVL1	100	150	-250	-200	-30.47892	-124.17837			ELAVL1	Elavl1	2.45	0.33	3.28E-01	2.17	1.66	-0.51	5.56	5.94	2.68	0.00
IGF2BP1_iClip	IGF2BP1	100	150	-300	-250	-35.04577	-121.75851			IGF2BP1	Igf2bp1	2.29	NA	NA	NA	NA	NA	NA	NA	NA	NA
DDX55_1_HepG2	DDX55	100	150	-200	-150	-30.65922	-117.22603			DDX55	Ddx55	1.68	0.00	1.50E-03	0.23	-0.43	-0.66	6.36	6.51	0.50	0.00
IGF2BP2_iClip	IGF2BP2	100	150	-200	-150	-28.57777	-115.36262			IGF2BP2	Igf2bp2	NA	0.51	5.11E-01	NA	NA	NA	NA	NA	NA	NA
FUBP3_1_HepG2	FUBP3	100	150	-150	-100	-22.73462	-113.77421			FUBP3	Fubp3	2.80	-0.49	-4.90E-01	-1.14	-0.74	0.40	9.80	9.63	1.51	3.29
UPF1_2_K652	UPF1	100	150	-400	-350	-30.73005	-111.37563			UPF1	Upf1	2.40	-0.32	-3.23E-01	-0.60	0.39	0.99	4.22	4.34	0.50	1.30
UPF1_1_K652	UPF1	100	150	-450	-400	-43.44118	-111.35141			UPF1	Upf1	2.40	-0.32	-3.23E-01	-0.60	0.39	0.99	4.22	4.34	0.50	1.30
IGF2BP1_2_K652	IGF2BP1	100	150	-300	-250	-30.61868	-110.89227			IGF2BP1	Igf2bp1	2.29	NA	NA	NA	NA	NA	NA	NA	NA	NA
LSM11_1_HepG2	LSM11	50	100	-200	-150	-27.00810	-110.39373			LSM11	Lsm11	1.95	-0.36	-3.64E-01	1.57	0.89	-0.68	8.98	8.80	4.32	0.80
TIA1_2_HepG2	TIA1	100	150	-250	-200	-24.47594	-107.49720			TIA1	Tia1	2.79	0.23	2.34E-01	1.00	0.56	-0.45	2022-06-08	7.96	3.81	2022-01-01
FAM120A_2_K652	FAM120A	100	150	-450	-400	-35.52972	-104.22568			FAM120A	Fam120a	2.56	-0.73	-7.34E-01	-0.39	0.42	0.81	13.22	12.67	8.40	7.29
IGF2BP1_2_HepG2	IGF2BP1	100	150	-500	-450	-44.47448	-96.80584			IGF2BP1	Igf2bp1	2.29	NA	NA	NA	NA	NA	NA	NA	NA	NA
YBX3_2_K652	YBX3	100	150	-500	-450	-35.16111	-95.85284			YBX3	Ybx3	2.90	0.93	9.29E-01	-0.47	0.78	1.25	12.13	12.26	9.31	9.36
IGF2BP1_1_K652	IGF2BP1	100	150	-300	-250	-25.71677	-91.00229			IGF2BP1	Igf2bp1	2.29	NA	NA	NA	NA	NA	NA	NA	NA	NA
YBX3_1_K652	YBX3	100	150	-400	-350	-34.34599	-90.56587			YBX3	Ybx3	2.90	0.93	9.29E-01	-0.47	0.78	1.25	12.13	12.26	9.31	9.36
SND1_2_K652	SND1	100	150	-250	-200	-25.65563	-88.24984			SND1	Snd1	2022-12-02	-0.13	-1.33E-01	-0.99	-0.68	0.30	11.32	11.18	3.99	4.58
IGF2BP3_2_HepG2	IGF2BP3	100	150	-300	-250	-48.13980	-82.95367			IGF2BP3	Igf2bp3	2.19	-0.25	-2.55E-01	-1.00	-2.03	-1.03	10.22	2022-11-10	1.51	2.80
FUBP3_2_HepG2	FUBP3	50	100	-150	-100	-15.11257	-81.63373			FUBP3	Fubp3	2.80	-0.49	-4.90E-01	-1.14	-0.74	0.40	9.80	9.63	1.51	3.29
STAU1_iClip	STAU1	50	100	-350	-300	-31.44642	-79.78864			STAU1	Stau1	2.27	0.17	1.72E-01	1.37	0.66	-0.71	10.81	2022-03-11	5.81	3.47
HNRNPC_iClip	HNRNPC	100	150	-500	-450	-19.66477	-75.22455			HNRNPC	HNRNPC	2.63	-0.25	-2.49E-01	1.66	0.45	-1.21	2022-09-13	2022-12-13	9.33	5.57
FAM120A_1_K652	FAM120A	100	150	-500	-450	-27.30792	-74.56880			FAM120A	Fam120a	2.56	-0.73	-7.34E-01	-0.39	0.42	0.81	13.22	12.67	8.40	7.29
IGF2BP2_1_K652	IGF2BP2	100	150	-350	-300	-31.98881	-74.13368			IGF2BP2	Igf2bp2	NA	0.51	5.11E-01	NA	NA	NA	NA	NA	NA	NA
CDC40_1_HepG2	CDC40	100	150	-150	-100	-31.80771	-72.87740			CDC40	Cdc40	1.91	-0.22	-2.22E-01	-1.11	-0.53	0.57	8.79	8.93	1.30	2.89
FAM120A_1_HepG2	FAM120A	100	150	-250	-200	-36.79748	-70.62288			FAM120A	Fam120a	2.56	-0.73	-7.34E-01	-0.39	0.42	0.81	13.22	12.67	8.40	7.29
HNRNPUL1_1_HepG2	HNRNPUL1	100	150	-250	-200	-14.54593	-64.40559			HNRNPUL1	Hnrnpul1	2.97	0.09	9.27E-02	0.87	0.34	-0.53	8.21	8.76	2.41	1.17
IGF2BP1_1_HepG2	IGF2BP1	100	150	-500	-450	-42.66667	-60.42887			IGF2BP1	Igf2bp1	2.29	NA	NA	NA	NA	NA	NA	NA	NA	NA
RBM27_2_K652	RBM27	100	150	-150	-100	-17.99708	-59.88431			RBM27	Rbm27	2.41	-0.41	-4.08E-01	1.15	0.50	-0.66	6.19	6.27	1.50	0.00
EIF3D_1_HepG2	EIF3D	100	150	-200	-150	-22.17538	-57.23605			EIF3D	Eif3d	2.16	-0.17	-1.68E-01	-0.66	0.52	1.19	9.87	9.81	4.22	5.21
FASTKD2_1_HepG2	FASTKD2	100	150	-350	-300	-21.75144	-56.58528			FASTKD2	Fastkd2	1.64	0.20	1.96E-01	-2.19	-0.52	1.67	5.47	5.81	0.00	2.42
LIN28B_1_HepG2	LIN28B	100	150	-300	-250	-28.80982	-55.39275			LIN28B	Lin28b	2.17	0.24	2.40E-01	-0.10	-0.81	-0.71	8.38	8.83	2022-01-01	1.17
IGF2BP3_1_HepG2	IGF2BP3	100	150	-300	-250	-28.76727	-51.77028			IGF2BP3	Igf2bp3	2.19	-0.25	-2.55E-01	-1.00	-2.03	-1.03	10.22	2022-11-10	1.51	2.80
DHX30_1_HepG2	DHX30	50	100	-350	-300	-18.81979	-49.03674			DHX30	Dhx30	1.74	0.22	2.21E-01	1.51	1.16	-0.35	10.97	11.36	6.60	4.36
FAM120A_2_HepG2	FAM120A	100	150	-250	-200	-27.34755	-48.93511			FAM120A	Fam120a	2.56	-0.73	-7.34E-01	-0.39	0.42	0.81	13.22	12.67	8.40	7.29
CDC40_2_HepG2	CDC40	50	100	-250	-200	-13.01845	-44.63991			CDC40	Cdc40	1.91	-0.22	-2.22E-01	-1.11	-0.53	0.57	8.79	8.93	1.30	2.89
DHX30_2_HepG2	DHX30	50	100	-250	-200	-20.91109	-38.27375			DHX30	Dhx30	1.74	0.22	2.21E-01	1.51	1.16	-0.35	10.97	11.36	6.60	4.36
SND1_1_HepG2	SND1	100	150	-250	-200	-22.32831	-35.85155			SND1	Snd1	2022-12-02	-0.13	-1.33E-01	-0.99	-0.68	0.30	11.32	11.18	3.99	4.58
UCHL5_2_HepG2	UCHL5	100	150	-250	-200	-26.82355	-34.86086			UCHL5	Uchl5	1.89	-0.11	-1.11E-01	0.61	1.92	1.31	8.13	8.15	6.36	4.38
GRWD1_1_HepG2	GRWD1	100	150	-500	-450	-24.13717	-32.55507			GRWD1	Grwd1	1.90	0.48	4.78E-01	0.23	-0.63	-0.86	9.50	2022-04-10	1.80	2022-01-02
FMR1_1_K652	FMR1	100	150	-300	-250	-11.77877	-24.15716			FMR1	Fmr1	2.57	-0.18	-1.81E-01	0.87	0.33	-0.53	10.47	10.49	4.21	2.67
Table S8 : 27 predicted negative regulators of the short 3’ UTR and positive regulators of the long 3’ UTR. Columns represent: 1- CLIP experiment ID, 2- human protein symbol of the clipped RBP, 3- position (start) relative to the promoter-proximal (Ip) 3' end where RBP is most significantly associated with promoter-proximal 3’ UTR isoform relative usage, 4- position (end) relative to the promoter…
