# Supplementary material for: The predicted RNA-binding protein regulome of axonal mRNAs
Source: HighWire-hosted journal article supplement (doi:10.1101/gr.277804.123), 2023-08-15
Supplement: Supplemental_Tables.zip [file Supplemental Table S10.xlsx]

## Sheet: Sheet1
coord	uniqueIDs	GS	txID	diff.transport	diff(AX/CB)	transport.ngf	transport.nt3	cb.ngf	cb.nt3	axons.ngf	axons.nt3	wL
chr10:108027036-108027228	ENSRNOT00000073140.0	Eif4a3	ENSRNOT00000073140	1.40	2022-06-04	2022-10-01	-0.30	10.13	10.51	7.83	4.15	193
chr2:49528346-49530314	ENSRNOT00000024456.0	Smn1	ENSRNOT00000024456	1.77	4.00	1.40	-0.37	9.34	10.00	7.15	3.80	1969
chr3:139717696-139717715	ENSRNOT00000006412.0	Ndufaf5	ENSRNOT00000006412	2.14	4.42	1.84	-0.30	9.62	10.15	2022-04-08	4.15	20
chr3:78594077-78594377	ENSRNOT00000007914.0	Tmx2	ENSRNOT00000007914	1.71	4.62	1.26	-0.45	10.45	10.36	8.21	3.50	301
chr2:166955739-166956607	ENSRNOT00000022105.4	Tm4sf4	ENSRNOT00000022105	1.54	3.93	2022-03-01	-0.52	10.46	2022-01-10	7.62	3.23	869
chr3:180904810-180905564	ENSRNOT00000022451.3	Rgs19	ENSRNOT00000022451	2022-10-02	4.94	2022-06-01	-1.04	9.75	10.13	6.31	1.75	755
chr1:160037254-160037865	ENSRNOT00000023239.0	Prss23	ENSRNOT00000023239	2.61	6.22	2022-08-02	-0.53	2022-07-10	2022-06-10	9.13	2.89	612
chr1:226382006-226382656	ENSRNOT00000025546.0	Ssh3	ENSRNOT00000025546	1.70	3.69	2022-03-01	-0.67	9.81	10.25	5.71	2.46	651
chr10:66032984-66033717	ENSRNOT00000015207.0	Pigs	ENSRNOT00000015207	1.93	3.93	2022-08-01	-0.85	9.90	2022-03-10	5.84	2022-05-02	734
chr10:66341064-66341796	ENSRNOT00000014386.0	Eral1	ENSRNOT00000014386	3.20	6.85	2.36	-0.85	9.62	10.32	8.20	2022-05-02	733
chr10:88416138-88417166	ENSRNOT00000030344.0	Rab5c	ENSRNOT00000030344	1.39	3.33	2022-02-01	-0.37	9.46	10.55	5.69	3.45	1029
chr15:22515247-22516222	ENSRNOT00000010763.0	Pxk	ENSRNOT00000010763	2.67	5.86	1.98	-0.69	9.80	10.45	7.62	2.41	976
chr16:6588979-6589517	ENSRNOT00000025858.0	Prkcd	ENSRNOT00000025858	2022-02-02	5.29	1.35	-0.67	10.74	10.76	7.73	2.46	539
chr4:224839883-224840517	ENSRNOT00000026184.0	Ltbr	ENSRNOT00000026184	1.45	4.21	2022-06-01	-0.40	10.14	10.73	6.98	3.35	635
chr9:52383501-52383625	ENSRNOT00000050275.1	Wdr75	ENSRNOT00000050275	1.90	4.36	2022-02-01	-0.88	9.65	10.28	5.69	1.96	125
chr16:80807035-80808494	ENSRNOT00000067508.4	Rasa3	ENSRNOT00000067508	1.58	4.14	2022-03-01	-0.56	10.20	10.26	6.89	2.80	1460
chr4:186853890-186855261	ENSRNOT00000038244.5	Zxdc	ENSRNOT00000038244	1.94	4.51	1.46	-0.48	10.99	10.62	7.93	2022-06-03	1372
chr6:119525532-119528486	ENSRNOT00000013602.2	Gpatch2l	ENSRNOT00000013602	1.52	2022-12-04	2022-12-01	-0.40	10.40	10.72	2022-12-07	3.33	2955
chr4:210818979-210819856	ENSRNOT00000013831.3	Raf1	ENSRNOT00000013831	1.75	3.54	2022-03-01	-0.72	9.84	2022-02-10	5.71	2.34	878
chr14:37033185-37036365	ENSRNOT00000065458.0	Dcun1d4	ENSRNOT00000065458	2022-08-02	4.94	1.47	-0.61	10.43	10.60	7.24	2.46	3181
chr15:41788720-41790386	ENSRNOT00000014031.0	Lats2	ENSRNOT00000014031	1.50	4.28	2022-01-01	-0.49	11.13	10.58	7.63	2.80	1667
chr2:208169756-208171348	ENSRNOT00000056652.0	Shc1	ENSRNOT00000056652	1.92	4.60	1.38	-0.54	10.80	10.95	2022-07-07	2.63	1593
chr3:131661271-131662678	ENSRNOT00000028890.0	Gpcpd1	ENSRNOT00000028890	1.72	4.19	1.25	-0.47	10.28	10.53	6.80	2.85	1408
chr8:59720966-59727759	ENSRNOT00000022976.0	Hmg20a	ENSRNOT00000022976	1.98	4.32	1.29	-0.69	9.66	2022-07-10	6.16	2.24	6794
chr14:84216041-84217044	ENSRNOT00000025378.1	Patz1	ENSRNOT00000025378	2.22	5.53	1.48	-0.74	10.57	10.98	7.25	2.13	1004
chr1:45450559-45451507	ENSRNOT00000065733.3	Scaf8	ENSRNOT00000065733	2.48	5.66	1.90	-0.58	10.54	10.76	7.99	2.55	949
chr6:2291953-2295269	ENSRNOT00000072146.6	AABR06041411.1	ENSRNOT00000072146	2022-03-02	4.69	1.46	-0.57	10.41	10.45	7.23	2.58	3317
chr1:263389245-263391596	ENSRNOT00000023342.7	Ide	ENSRNOT00000023342	2.65	6.29	1.89	-0.76	10.33	10.74	7.97	2022-09-02	2352
chr2:1421813-1425343	ENSRNOT00000062052.4	Cast	ENSRNOT00000062052	1.56	3.32	1.15	-0.41	10.85	10.64	6.59	2022-06-03	3531
chr6:68147394-68152515	ENSRNOT00000065396.0	Etv1	ENSRNOT00000065396	1.67	2022-08-04	1.33	-0.34	10.91	10.95	7.39	3.34	5122
chr9:79920479-79924884	ENSRNOT00000023530.6	Igfbp5	ENSRNOT00000023530	1.63	4.70	1.28	-0.35	9.91	10.38	7.53	3.30	4406
chr13:89476477-89477385	ENSRNOT00000058689.5	Tada1	ENSRNOT00000058689	2022-10-02	5.97	1.14	-0.96	11.75	11.89	8.94	2022-11-03	909
chr7:65858938-65860993	ENSRNOT00000006566.4	Gns	ENSRNOT00000006566	2.32	5.73	1.42	-0.90	10.96	11.40	8.54	3.26	2056
chr7:63722902-63724947	ENSRNOT00000064349.4	Gns	ENSRNOT00000064349	2.32	5.73	1.42	-0.90	10.96	11.40	8.55	3.26	2046
chr1:228186741-228187917	ENSRNOT00000028363.0	Dpf2	ENSRNOT00000028363	1.50	3.82	2022-11-01	-0.39	11.54	11.82	2022-05-08	4.49	1177
chr12:24728207-24728445	ENSRNOT00000001921.0	Plod3	ENSRNOT00000001921	2.18	5.21	1.55	-0.63	10.54	11.26	8.16	3.67	239
chr18:5987818-5989462	ENSRNOT00000032454.0	Ss18	ENSRNOT00000032454	2.00	5.19	1.19	-0.81	11.74	11.94	8.22	3.22	1645
chr1:136793256-136802526	ENSRNOT00000076340.7	Slco3a1	ENSRNOT00000076340	1.84	4.19	2022-04-01	-0.80	10.52	2022-04-11	6.92	3.24	9271
chr8:84665118-84666336	ENSRNOT00000033196.3	Gclc	ENSRNOT00000033196	1.94	4.75	1.44	-0.49	11.49	11.56	8.76	2022-08-04	1219
chr6:59901865-59903193	ENSRNOT00000012004.3	Hbp1	ENSRNOT00000012004	1.75	3.51	1.45	-0.30	10.55	11.00	7.91	4.85	1329
chr6:89692937-89694143	ENSRNOT00000005439.4	Pnn	ENSRNOT00000005439	2022-12-02	5.16	1.35	-0.77	11.69	11.62	8.57	3.34	1207
chr14:2037369-2038521	ENSRNOT00000000048.3	Idua	ENSRNOT00000000048	2.75	6.49	1.43	-1.33	10.43	2022-09-11	7.88	2022-05-02	1153
chrX:69507563-69510513	ENSRNOT00000008705.5	Yipf6	ENSRNOT00000008705	1.74	4.25	1.15	-0.59	11.77	11.68	8.13	3.78	2951
chr2:225729112-225729750	ENSRNOT00000026382.4	Ap4b1	ENSRNOT00000026382	1.79	4.44	2022-01-01	-0.78	10.54	11.42	6.86	3.30	639
chr1:273700858-273701616	ENSRNOT00000027047.0	Trim8	ENSRNOT00000027047	2.42	5.19	1.57	-0.85	10.86	11.66	7.44	2022-05-03	759
chr2:9417663-9419865	ENSRNOT00000021804.0	Polr3g	ENSRNOT00000021804	1.61	3.76	2022-02-01	-0.59	11.69	11.45	7.65	3.65	2203
chr6:146184800-146187666	ENSRNOT00000018225.0	INF2	ENSRNOT00000018225	2.29	2022-06-05	1.58	-0.71	10.79	11.75	7.46	3.37	2867
chr6:146187038-146187666	ENSRNOT00000031962.0	INF2	ENSRNOT00000031962	2.29	2022-06-05	1.58	-0.71	10.79	11.75	7.46	3.37	629
chr8:117515770-117515841	ENSRNOT00000048764.0	Dhx30	ENSRNOT00000048764	1.51	2.62	1.16	-0.35	10.97	11.36	6.60	4.36	72
chr5:148211595-148216205	ENSRNOT00000037728.5	Ago1	ENSRNOT00000037728	2022-10-02	4.25	1.24	-0.85	10.62	11.14	6.78	2022-05-03	4611
chr10:63088294-63091999	ENSRNOT00000005262.4	Cpd	ENSRNOT00000005262	2.25	4.24	1.65	-0.60	10.72	2022-02-11	7.58	3.64	3706
chr13:103715733-103718648	ENSRNOT00000004032.6	Itpkb	ENSRNOT00000004032	1.55	2.55	1.23	-0.32	10.94	11.25	6.74	4.49	2916
chr1:129273893-129277568	ENSRNOT00000072915.7	Mef2a	ENSRNOT00000072915	2022-11-02	2022-07-04	1.33	-0.78	10.79	2022-10-11	6.96	3.21	3676
chr17:22193534-22195201	ENSRNOT00000071374.5	Jarid2	ENSRNOT00000071374	2022-05-02	4.93	2022-05-01	-1.00	11.59	11.55	7.73	2.77	1668
chr6:135864426-135868675	ENSRNOT00000064914.7	Btbd7	ENSRNOT00000064914	2.29	5.71	1.38	-0.91	11.18	11.45	8.37	2.93	4250
chr16:8238882-8240460	ENSRNOT00000066062.4	Ncoa4	ENSRNOT00000066062	1.94	3.71	1.48	-0.46	10.95	11.43	7.24	2022-01-04	1579
chr13:75622195-75624759	ENSRNOT00000003605.0	Lamc1	ENSRNOT00000003605	2022-09-02	5.32	1.22	-0.88	10.42	2022-05-11	7.13	2.44	2565
chr14:19335770-19337069	ENSRNOT00000068682.2	Ankrd17	ENSRNOT00000068682	2022-09-03	5.34	2.15	-0.93	10.51	11.00	7.65	2.80	1300
chr5:157046000-157046520	ENSRNOT00000024271.0	Syf2	ENSRNOT00000024271	1.67	2.81	1.34	-0.34	11.96	2022-03-12	9.37	6.63	521
chr10:10638001-10640614	ENSRNOT00000009936.0	Naa60	ENSRNOT00000009936	1.81	4.78	2022-04-01	-0.76	2022-02-12	12.51	8.91	4.63	2614
chr7:27313353-27314939	ENSRNOT00000077041.0	Tdg	ENSRNOT00000077041	1.70	3.59	1.31	-0.39	12.45	12.29	9.43	5.67	1587
chr7:27313358-27314939	ENSRNOT00000034213.0	Tdg	ENSRNOT00000034213	1.70	3.60	1.31	-0.39	12.45	12.29	9.43	5.67	1582
chrX:114827204-114828180	ENSRNOT00000017490.0	Cacnb3	ENSRNOT00000017490	1.39	2.30	2022-01-01	-0.39	10.90	2022-05-12	6.85	5.69	977
chr7:27313346-27314939	ENSRNOT00000076468.2	Tdg	ENSRNOT00000076468	1.70	3.59	1.31	-0.39	12.45	12.29	9.43	5.67	1594
chr7:63266819-63269400	ENSRNOT00000015665.5	Parvb	ENSRNOT00000015665	1.54	2.74	1.24	-0.30	11.57	2022-02-12	8.32	2022-03-06	2582
chr4:210483086-210486661	ENSRNOT00000011292.5	Syn2	ENSRNOT00000011292	1.52	2.73	1.21	-0.31	11.79	12.27	8.25	6.00	3576
chr5:176743048-176743894	ENSRNOT00000025531.3	Ccnl2	ENSRNOT00000025531	1.60	2.81	1.29	-0.30	11.62	2022-04-12	8.42	2022-03-06	847
chr2:163361719-163362444	ENSRNOT00000017453.0	Postn	ENSRNOT00000017453	2.16	4.34	1.85	-0.31	11.29	12.15	9.14	5.67	726
chr2:226917956-226920687	ENSRNOT00000019680.0	Cttnbp2nl	ENSRNOT00000019680	2.94	6.25	1.82	-1.11	2022-10-12	12.13	9.67	3.45	2732
chrX:56143036-56146151	ENSRNOT00000068479.0	Magt1	ENSRNOT00000068479	2.24	4.75	1.24	-1.00	12.41	2022-02-12	8.81	3.67	3116
chr3:107618345-107621987	ENSRNOT00000073258.7	Lin7c	ENSRNOT00000073258	1.98	4.55	1.13	-0.85	12.51	12.47	8.61	2022-02-04	3643
chr1:172072155-172078382	ENSRNOT00000025827.5	Fam168a	ENSRNOT00000025827	2.17	4.50	1.23	-0.94	11.96	12.19	2022-08-08	3.81	6228
chr11:89406803-89407565	ENSRNOT00000071493.0	Ufd1l	ENSRNOT00000071493	2022-03-02	2022-09-04	1.42	-0.61	13.22	13.22	10.47	6.39	763
chr8:39257606-39258514	ENSRNOT00000046590.0	Ei24	ENSRNOT00000046590	1.90	3.78	1.43	-0.47	13.86	13.91	10.50	6.77	909
chr6:116055560-116056315	ENSRNOT00000068522.3	Actn1	ENSRNOT00000068522	1.54	2.32	1.19	-0.35	12.86	13.16	9.19	7.16	756
chr3:17370765-17371045	ENSRNOT00000032078.0	Garnl3	ENSRNOT00000032078	1.72	2022-12-03	1.27	-0.45	12.70	13.32	8.86	6.35	281
chr4:214342253-214345405	ENSRNOT00000017294.0	Mar.08	ENSRNOT00000017294	2.33	5.45	1.17	-1.17	13.20	13.25	10.15	4.76	3153
chr3:99338248-99340997	ENSRNOT00000009000.5	Cd44	ENSRNOT00000009000	1.54	2.36	1.20	-0.35	12.67	2022-02-13	8.72	6.71	2750
chr3:17370627-17371045	ENSRNOT00000032897.2	Garnl3	ENSRNOT00000032897	1.72	3.14	1.27	-0.45	12.69	13.31	8.86	6.34	419
chr5:174938793-174939640	ENSRNOT00000075423.0	Tprg1l	ENSRNOT00000075423	1.46	1.95	2022-01-01	-0.46	13.88	2022-09-14	9.78	2022-04-08	848
chr11:38330437-38331643	ENSRNOT00000065600.4	Ttc3	ENSRNOT00000065600	2.14	1.89	2022-03-01	-1.11	14.94	15.33	10.45	8.96	1207
chr13:87621445-87622598	ENSRNOT00000003932.0	Atp1b1	ENSRNOT00000003932	2.54	1.31	1.33	-1.21	18.88	18.59	13.47	11.87	1154
chr7:140110484-140110766	ENSRNOT00000006351.0	Cela1	ENSRNOT00000006351	3.73	3.63	3.30	-0.43	2022-12-04	3.94	3.81	0.00	283
chr17:35833700-35835472	ENSRNOT00000023957.5	Foxc1	ENSRNOT00000023957	2.19	1.53	1.76	-0.43	3.90	3.92	1.51	0.00	1773
chrX:134620256-134621386	ENSRNOT00000072822.0	Cxxc5	ENSRNOT00000072822	2.68	1.95	2.22	-0.46	4.23	3.78	2.41	0.00	1131
chr20:55397366-55397927	ENSRNOT00000037559.3	Grik2	ENSRNOT00000037559	2.43	1.29	1.97	-0.46	4.81	3.86	2.23	0.00	562
chr10:28704602-28706946	ENSRNOT00000029118.3	Atp10b	ENSRNOT00000029118	4.52	5.79	4.00	-0.52	3.86	3.99	5.66	0.00	2345
chr7:29383390-29383631	ENSRNOT00000067777.2	RGD1561102	ENSRNOT00000067777	2.90	2022-01-04	2.40	-0.50	3.77	4.65	2022-12-03	0.00	242
chr20:7179757-7180181	ENSRNOT00000038130.2	Ly6g5b	ENSRNOT00000038130	2.17	3.25	1.69	-0.48	2022-11-04	4.66	2.70	0.00	425
chr10:56036418-56036912	ENSRNOT00000064401.0	Tnfsf12	ENSRNOT00000064401	3.19	2.61	2.70	-0.49	3.99	4.64	1.96	0.00	495
chr19:36994841-36995176	ENSRNOT00000004601.0	Klf1	ENSRNOT00000004601	2.92	3.48	2.43	-0.49	4.37	4.85	3.00	0.00	336
chr2:243359655-243360438	ENSRNOT00000015836.0	F3	ENSRNOT00000015836	3.79	4.47	3.30	-0.49	2022-09-04	4.90	3.66	0.00	784
chr20:6073116-6073320	ENSRNOT00000000528.0	PSNRBP8	ENSRNOT00000000528	4.49	3.22	4.00	-0.49	3.96	4.53	2.65	0.00	205
chr3:153454955-153455399	ENSRNOT00000012690.0	Sdcbp2	ENSRNOT00000012690	2.68	2022-01-03	2.19	-0.49	4.68	4.89	2.80	0.00	445
chr4:224311988-224312762	ENSRNOT00000051613.0	Lrrc23	ENSRNOT00000051613	2.44	2.63	1.95	-0.49	4.34	4.41	2.55	0.00	775
chr1:75154472-75154730	ENSRNOT00000038898.1	Lilrb4	ENSRNOT00000038898	2.82	2.72	2.34	-0.49	4.66	4.49	2.89	0.00	259
chr10:110383504-110387214	ENSRNOT00000071523.2	B3gntl1	ENSRNOT00000071523	2.31	2.39	1.83	-0.49	4.24	4.20	2.43	0.00	3711
chr10:63633109-63634257	ENSRNOT00000010386.3	Glod4	ENSRNOT00000010386	2022-11-02	2.84	1.62	-0.49	5.16	4.98	2022-02-03	0.00	1149
chr8:23000826-23001428	ENSRNOT00000049993.2	Ccdc159	ENSRNOT00000049993	1.59	2022-01-02	2022-10-01	-0.49	2022-10-04	4.37	1.74	0.00	603
chr19:50072995-50081472	ENSRNOT00000027561.5	Sntb2	ENSRNOT00000027561	2.18	2.42	1.69	-0.49	4.84	4.96	2.30	0.00	8478
chr11:35167629-35168814	ENSRNOT00000072856.4	Ifnar2	ENSRNOT00000072856	1.59	2022-02-02	2022-10-01	-0.49	4.29	4.58	1.74	0.00	1186
chr7:12551738-12552840	ENSRNOT00000021709.3	Efna2	ENSRNOT00000021709	1.59	1.45	2022-10-01	-0.49	4.82	4.53	1.74	0.00	1103
chr1:143008780-143013524	ENSRNOT00000018107.5	Ngrn	ENSRNOT00000018107	4.49	4.84	4.00	-0.49	3.84	4.67	2022-01-04	0.00	4745
chrX:43835770-43846280	ENSRNOT00000005033.8	Acot9	ENSRNOT00000005033	1.74	2.14	1.26	-0.49	4.58	4.81	1.91	0.00	10511
chr3:2604333-2604728	ENSRNOT00000018560.0	Entpd2	ENSRNOT00000018560	1.57	1.75	2022-09-01	-0.48	3.86	4.32	1.30	0.00	396
chr5:82530889-82531126	ENSRNOT00000034978.0	LOC500475	ENSRNOT00000034978	1.66	1.73	1.19	-0.48	4.14	4.28	1.59	0.00	238
chr8:62843791-62844100	ENSRNOT00000034300.0	Loxl1	ENSRNOT00000034300	1.91	2.33	1.43	-0.48	4.13	4.67	1.79	0.00	310
chr5:132050950-132051094	ENSRNOT00000012492.2	Orc1	ENSRNOT00000012492	3.30	3.00	2.82	-0.48	4.54	4.70	2.84	0.00	145
chr16:5993597-5994674	ENSRNOT00000020750.2	Actr8	ENSRNOT00000020750	4.48	4.31	4.00	-0.48	3.65	2022-12-04	3.83	0.00	1078
chr19:66395665-66396736	ENSRNOT00000033352.2	Cdh15	ENSRNOT00000033352	2.33	2.66	1.86	-0.48	2022-02-05	4.80	2.88	0.00	1072
chrX:154502494-154512389	ENSRNOT00000001154.8	Rbmx	ENSRNOT00000001154	2.93	2.84	2.46	-0.48	4.18	4.45	2.57	0.00	9896
chr2:218475728-218485823	ENSRNOT00000000106.6	Gpr89b	ENSRNOT00000000106	2.64	3.22	2.17	-0.48	4.00	4.84	2.38	0.00	10096
chr5:170764962-170767332	ENSRNOT00000055536.3	Gpr157	ENSRNOT00000055536	1.66	2.39	1.19	-0.48	2022-06-04	4.86	1.59	0.00	2371
chr15:38390418-38390744	ENSRNOT00000027789.0	Nfatc4	ENSRNOT00000027789	1.95	2.19	1.47	-0.47	3.94	4.33	1.80	0.00	327
chr7:97055458-97057465	ENSRNOT00000006517.0	Has2	ENSRNOT00000006517	4.47	2.80	4.00	-0.47	4.51	4.17	3.15	0.00	2008
chr2:139934334-139934532	ENSRNOT00000065469.2	Ccdc39	ENSRNOT00000065469	4.47	4.87	4.00	-0.47	4.21	4.91	4.17	0.00	199
chr18:82643880-82650582	ENSRNOT00000019384.7	Neto1	ENSRNOT00000019384	1.50	0.87	2022-02-01	-0.47	4.88	4.44	1.30	0.00	6703
chr8:70109673-70111173	ENSRNOT00000045430.3	Slc24a1	ENSRNOT00000045430	4.47	4.16	4.00	-0.47	4.39	4.95	3.60	0.00	1501
chr1:274468115-274472739	ENSRNOT00000076452.3	Neurl1	ENSRNOT00000076452	1.84	1.69	1.37	-0.47	4.76	4.81	1.64	0.00	4625
chr20:28232258-28234407	ENSRNOT00000033980.6	Lrrtm3	ENSRNOT00000033980	2022-12-02	1.74	1.65	-0.47	4.89	4.77	1.86	0.00	2150
chr13:88667805-88672334	ENSRNOT00000004326.7	Adcy10	ENSRNOT00000004326	1.69	1.81	1.22	-0.47	4.64	4.94	1.51	0.00	4530
chr15:37433370-37438329	ENSRNOT00000020409.4	Bcl2l2	ENSRNOT00000020409	2.22	1.91	1.75	-0.47	4.83	4.83	1.91	0.00	4960
chr9:82524221-82536150	ENSRNOT00000027337.5	Slc4a3	ENSRNOT00000027337	1.53	1.64	2022-05-01	-0.47	2022-09-05	4.64	2022-09-02	0.00	11930
chr7:141517144-141517342	ENSRNOT00000074212.2	Tenc1	ENSRNOT00000074212	2.25	2.59	1.77	-0.47	3.86	4.41	2022-04-02	0.00	199
chr2:97789017-97790396	ENSRNOT00000065897.3	Myo10	ENSRNOT00000065897	4.46	6.42	4.00	-0.46	2022-10-04	4.67	5.86	0.00	1380
chr7:14293870-14294852	ENSRNOT00000037456.2	Notch3	ENSRNOT00000037456	2022-12-03	3.63	2.66	-0.46	4.34	4.91	2022-06-03	0.00	983
chr11:70484706-70484781	ENSRNOT00000045639.0	Stfa2l1	ENSRNOT00000045639	2.43	4.90	2022-02-02	-0.41	5.25	2022-11-05	5.54	0.50	76
chrX:33793069-33793177	ENSRNOT00000005622.0	S100g	ENSRNOT00000005622	1.50	2.51	2022-09-01	-0.41	4.63	5.18	2.46	0.50	109
chr8:47348551-47349833	ENSRNOT00000029546.4	Rps25	ENSRNOT00000029546	1.42	2022-11-03	2022-01-01	-0.41	5.78	5.76	3.64	0.50	1283
chr10:15043744-15044015	ENSRNOT00000027170.0	Fam195a	ENSRNOT00000027170	1.46	2.52	2022-09-01	-0.36	4.41	5.42	2022-01-02	0.50	272
chr14:85645327-85645517	ENSRNOT00000010332.0	Zmat5	ENSRNOT00000010332	1.90	2.67	1.36	-0.54	4.87	5.21	2.33	0.00	191
chr15:65214322-65214704	ENSRNOT00000068216.0	Rgcc	ENSRNOT00000068216	2022-08-03	5.30	2.54	-0.54	5.44	5.88	4.86	0.00	383
chr16:61753739-61753859	ENSRNOT00000017883.1	Rbpms	ENSRNOT00000017883	2022-11-03	2022-08-04	2.74	-0.36	4.80	5.79	3.59	0.50	121
chr10:18443836-18444653	ENSRNOT00000040737.3	Kcnip1	ENSRNOT00000040737	2.41	3.88	1.87	-0.54	4.55	5.55	2.88	0.00	818
chr1:233447565-233448642	ENSRNOT00000050716.4	Lrrc10b	ENSRNOT00000050716	1.64	2.84	2022-09-01	-0.54	5.91	5.89	2.87	0.00	1078
chr8:22138161-22138374	ENSRNOT00000068598.1	Zglp1	ENSRNOT00000068598	1.37	2.41	2022-01-01	-0.36	5.53	5.74	2.71	0.50	214
chr2:251552864-251559408	ENSRNOT00000014510.5	LOC691931	ENSRNOT00000014510	2.77	3.55	2.22	-0.54	4.70	2022-03-05	3.22	0.00	6545
chr17:12878620-12883841	ENSRNOT00000000117.6	Cplx2	ENSRNOT00000000117	2.58	3.19	2.22	-0.36	4.98	5.46	3.22	0.50	5222
chr1:232064354-232064627	ENSRNOT00000026897.0	Rom1	ENSRNOT00000026897	1.60	2.20	2022-05-01	-0.56	7.92	5.98	4.14	0.00	274
chr10:10636736-10637081	ENSRNOT00000076532.0	RGD1561796	ENSRNOT00000076532	1.51	2.23	1.20	-0.31	5.17	5.44	2.47	0.50	346
chr10:88787907-88788253	ENSRNOT00000026878.0	Hsd17b1	ENSRNOT00000026878	1.72	2.66	1.16	-0.56	5.19	5.44	2.41	0.00	347
chr10:110227759-110227791	ENSRNOT00000054915.0	Fn3k	ENSRNOT00000054915	1.46	1.67	1.15	-0.31	4.87	5.25	1.80	0.50	33
chr13:41329082-41329152	ENSRNOT00000071437.0	LOC288978	ENSRNOT00000071437	3.86	3.90	3.30	-0.56	4.89	2022-07-05	3.72	0.00	71
chr19:37000916-37001146	ENSRNOT00000014887.0	Dnase2	ENSRNOT00000014887	1.54	1.81	1.24	-0.31	5.81	5.61	2.51	0.50	231
chr2:143742244-143742337	ENSRNOT00000023437.0	Nudt6	ENSRNOT00000023437	1.68	2.58	2022-12-01	-0.56	5.45	5.67	2.35	0.00	94
chr8:102934467-102934915	ENSRNOT00000074047.0	PCOLCE2	ENSRNOT00000074047	2.64	3.25	2.33	-0.31	5.81	5.81	3.76	0.50	449
chr9:13532920-13533292	ENSRNOT00000018351.0	Trem2	ENSRNOT00000018351	2.74	3.58	2.19	-0.56	4.29	2022-07-05	2.80	0.00	373
chr1:267259588-267262691	ENSRNOT00000054719.6	Entpd1	ENSRNOT00000054719	2.24	3.53	1.68	-0.56	2022-08-05	5.53	2022-08-03	0.00	3104
chr7:12570165-12572034	ENSRNOT00000021648.4	Cirbp	ENSRNOT00000021648	2.19	3.31	1.64	-0.56	5.64	5.92	2022-03-03	0.00	1870
chr1:103187417-103188486	ENSRNOT00000028685.2	Kcnj11	ENSRNOT00000028685	1.64	2.14	1.34	-0.31	5.62	5.62	2.65	0.50	1070
chr10:83997957-83999477	ENSRNOT00000011027.2	Hoxb3	ENSRNOT00000011027	3.46	3.88	3.15	-0.31	4.63	5.42	3.59	0.50	1521
chr2:82801377-82806585	ENSRNOT00000025966.6	Npr3	ENSRNOT00000025966	1.34	2.18	2022-03-01	-0.31	2022-01-04	2022-03-05	1.67	0.50	5209
chr1:142825049-142830323	ENSRNOT00000019059.5	Idh2	ENSRNOT00000019059	2.44	3.34	2.14	-0.31	4.58	5.70	2.74	0.50	5275
chr20:21770866-21772671	ENSRNOT00000074657.5	Slc16a9	ENSRNOT00000074657	2.65	3.37	2022-09-02	-0.56	4.92	5.59	2.70	0.00	1806
chr8:54044945-54047106	ENSRNOT00000040162.3	Layn	ENSRNOT00000040162	2.14	2.96	1.59	-0.56	5.99	5.97	2.97	0.00	2162
chr3:126193337-126197330	ENSRNOT00000017603.6	Ciao1	ENSRNOT00000017603	2.93	3.33	2.62	-0.31	4.50	5.18	3.16	0.50	3994
chr4:224343393-224346644	ENSRNOT00000020647.5	Tpi1	ENSRNOT00000020647	1.73	2.85	1.42	-0.31	6.35	5.94	3.76	0.50	3252
chr1:128075143-128076487	ENSRNOT00000016916.2	Vimp	ENSRNOT00000016916	2.66	3.29	2.36	-0.31	5.37	5.36	3.80	0.50	1345
chr1:88371195-88374004	ENSRNOT00000044145.2	Yif1b	ENSRNOT00000044145	2022-01-03	3.31	2.70	-0.31	4.56	5.15	3.22	0.50	2810
chr19:54693521-54705895	ENSRNOT00000025761.11	Zfp1	ENSRNOT00000025761	1.77	2.58	1.22	-0.56	5.36	5.46	2.48	0.00	12375
chr12:24810394-24813864	ENSRNOT00000046412.6	Ift22	ENSRNOT00000046412	4.56	6.22	4.00	-0.56	5.17	5.80	5.60	0.00	3471
chr2:183466027-183470666	ENSRNOT00000016843.5	Shox2	ENSRNOT00000016843	1.91	2.76	1.35	-0.56	5.23	5.32	2.67	0.00	4640
chr1:43791187-43791711	ENSRNOT00000029416.0	Fbxo5	ENSRNOT00000029416	2.75	3.61	2.24	-0.51	5.68	6.00	3.29	0.00	525
chr10:105313763-105314605	ENSRNOT00000016622.0	St6galnac2	ENSRNOT00000016622	3.74	3.69	3.22	-0.51	4.73	5.18	3.24	0.00	843
chr14:37837674-37838224	ENSRNOT00000003125.0	Tec	ENSRNOT00000003125	3.31	3.58	2.80	-0.51	4.45	5.21	2.81	0.00	551
chr16:20211425-20213710	ENSRNOT00000025956.0	Arrdc2	ENSRNOT00000025956	1.57	1.63	2022-06-01	-0.51	5.39	2022-02-05	2022-01-02	0.00	2286
chr7:29007048-29008956	ENSRNOT00000059487.0	Dram1	ENSRNOT00000059487	2.82	3.44	2.30	-0.51	5.82	5.94	3.32	0.00	1909
chr9:25962739-25962902	ENSRNOT00000017393.0	Efhc1	ENSRNOT00000017393	1.57	1.95	2022-05-01	-0.51	5.53	5.48	2.00	0.00	164
chr9:98176607-98177317	ENSRNOT00000027232.0	Klhl30	ENSRNOT00000027232	3.61	4.50	2022-10-03	-0.51	4.33	5.70	3.13	0.00	711
chr9:94290729-94291457	ENSRNOT00000022485.0	LOC100912512	ENSRNOT00000022485	2.63	3.45	2022-11-02	-0.51	5.67	5.97	3.15	0.00	729
chr15:36968971-36970519	ENSRNOT00000075610.3	Mmp14	ENSRNOT00000075610	4.21	4.58	3.70	-0.51	5.00	5.64	3.93	0.00	1549
chr2:285059240-285063318	ENSRNOT00000055245.1	Wls	ENSRNOT00000055245	3.67	3.62	3.15	-0.51	4.62	2022-03-05	3.20	0.00	4079
chr20:57156235-57163779	ENSRNOT00000057016.6	Ascc3	ENSRNOT00000057016	4.21	2022-06-04	3.70	-0.51	4.84	5.31	3.60	0.00	7545
chr1:143936264-143937046	ENSRNOT00000025621.2	Slc28a1	ENSRNOT00000025621	1.57	2022-11-02	2022-06-01	-0.51	5.37	5.48	2022-01-02	0.00	783
chr3:17625875-17627282	ENSRNOT00000022585.4	Angptl2	ENSRNOT00000022585	4.51	5.42	4.00	-0.51	4.60	5.81	4.21	0.00	1408
chr4:145013289-145013695	ENSRNOT00000014331.2	LOC500124	ENSRNOT00000014331	2022-03-02	2.51	1.51	-0.51	5.68	5.68	2.51	0.00	407
chr14:45619554-45635310	ENSRNOT00000002977.6	Pgm2	ENSRNOT00000002977	1.64	1.84	2022-12-01	-0.51	5.35	2022-11-05	2022-08-02	0.00	15757
chr4:224752262-224752756	ENSRNOT00000038178.2	Tapbpl	ENSRNOT00000038178	2.15	2.81	1.64	-0.51	4.29	5.13	1.96	0.00	495
chr1:48743391-48743828	ENSRNOT00000067916.2	Rsph3	ENSRNOT00000067916	2.36	2.51	1.84	-0.51	4.98	5.36	2.13	0.00	438
chr3:58806427-58807413	ENSRNOT00000007615.5	Galnt3	ENSRNOT00000007615	2.34	2.23	1.83	-0.51	5.73	2022-09-05	2.86	0.00	987
chr17:71999629-72004173	ENSRNOT00000024952.7	Gdi2	ENSRNOT00000024952	3.40	3.74	2022-10-03	-0.31	2022-09-05	5.34	3.95	0.47	4545
chr12:605965-613467	ENSRNOT00000001468.5	N4bp2l2	ENSRNOT00000001468	1.61	2022-04-02	2022-10-01	-0.51	5.14	5.14	2022-05-02	0.00	7503
chr15:38327967-38329796	ENSRNOT00000027604.3	Nop9	ENSRNOT00000027604	2.66	3.15	2.14	-0.51	4.22	2022-01-05	2.36	0.00	1830
chr10:27154359-27156914	ENSRNOT00000004725.0	Gabra1	ENSRNOT00000004725	3.54	2022-09-04	3.00	-0.54	5.79	5.80	2022-07-04	0.00	2556
chr2:226697325-226697874	ENSRNOT00000018061.0	Mov10	ENSRNOT00000018061	2.53	2.74	1.99	-0.54	4.68	5.34	2022-08-02	0.00	550
chr3:165905616-165907940	ENSRNOT00000010939.0	Jph2	ENSRNOT00000010939	2.54	2022-08-03	2.00	-0.54	5.68	5.57	3.19	0.00	2325
chr7:33615235-33616643	ENSRNOT00000005463.0	Nedd1	ENSRNOT00000005463	2.60	3.18	2022-06-02	-0.54	5.50	5.40	3.28	0.00	1409
chr7:2962964-2964701	ENSRNOT00000006796.7	Erbb3	ENSRNOT00000006796	1.62	2.60	2022-07-01	-0.54	2022-12-05	5.59	2.13	0.00	1738
chr12:24251059-24253291	ENSRNOT00000001912.3	Gigyf1	ENSRNOT00000001912	1.87	2.65	1.57	-0.30	4.20	5.52	1.80	0.47	2233
chr3:16423005-16424190	ENSRNOT00000037164.3	Nup214	ENSRNOT00000037164	1.78	2.19	1.24	-0.54	5.66	5.50	2.35	0.00	1186
chr7:121604660-121612256	ENSRNOT00000048790.3	Cacna1i	ENSRNOT00000048790	3.70	4.37	3.15	-0.54	2022-11-06	5.39	2022-09-05	0.00	7597
chr10:86007049-86015706	ENSRNOT00000008256.5	Cdk12	ENSRNOT00000008256	2.76	3.42	2.22	-0.54	5.63	5.59	3.47	0.00	8658
chr19:66014941-66015245	ENSRNOT00000058332.0	Piezo1	ENSRNOT00000058332	2.62	2.57	2022-10-02	-0.52	3.96	2022-03-05	1.50	0.00	305
chr20:45926316-45926467	ENSRNOT00000000737.0	Lama4	ENSRNOT00000000737	1.84	2.61	1.32	-0.52	4.57	5.26	1.91	0.00	152
chr18:40147967-40152395	ENSRNOT00000004784.8	Fem1c	ENSRNOT00000004784	1.67	3.31	1.33	-0.34	5.32	5.31	3.82	0.50	4429
chr1:141793140-141793996	ENSRNOT00000049681.3	Acan	ENSRNOT00000049681	3.00	5.96	2.48	-0.52	2022-08-05	5.53	5.50	0.00	857
chr1:171680118-171680739	ENSRNOT00000023802.2	C2cd3	ENSRNOT00000023802	1.89	2.63	1.37	-0.52	4.71	5.38	1.96	0.00	622
chr18:57576278-57577567	ENSRNOT00000065693.2	Piezo2	ENSRNOT00000065693	3.62	4.29	2022-10-03	-0.52	4.76	5.78	3.27	0.00	1290
chr1:81057354-81057412	ENSRNOT00000018233.0	Pglyrp1	ENSRNOT00000018233	1.56	3.70	1.18	-0.38	6.13	6.71	3.91	0.80	59
chr8:48342641-48343346	ENSRNOT00000064611.0	Fxyd2	ENSRNOT00000064611	2022-03-02	4.15	1.37	-0.67	6.26	6.13	4.28	0.00	706
chr8:117270098-117270334	ENSRNOT00000056180.0	Spink8	ENSRNOT00000056180	3.91	2022-04-06	3.52	-0.38	5.96	6.88	5.91	0.80	237
chr3:108150062-108151338	ENSRNOT00000006203.3	Fibin	ENSRNOT00000006203	1.58	3.34	2022-10-01	-0.48	6.31	6.45	3.70	0.50	1277
chr11:3142250-3144151	ENSRNOT00000042316.4	Vgll3	ENSRNOT00000042316	1.69	3.66	2022-03-01	-0.67	6.74	6.84	3.56	0.00	1902
chr6:38448933-38455914	ENSRNOT00000070979.4	Cenpo	ENSRNOT00000070979	2022-11-03	2022-05-05	2.44	-0.67	5.70	6.00	4.74	0.00	6982
chr17:55120129-55121703	ENSRNOT00000074146.7	Crem	ENSRNOT00000074146	1.81	3.68	1.15	-0.67	6.22	2022-08-06	3.82	0.00	1575
chr12:20519592-20521373	ENSRNOT00000036606.4	Asmtl	ENSRNOT00000036606	1.81	3.77	1.33	-0.48	6.69	6.73	4.22	0.50	1782
chr1:23017325-23017705	ENSRNOT00000017911.0	Arg1	ENSRNOT00000017911	1.54	2.57	1.21	-0.33	6.24	6.22	3.38	0.80	381
chr1:83740937-83741208	ENSRNOT00000028029.0	B9d2	ENSRNOT00000028029	2.95	4.71	2.30	-0.65	5.90	6.89	3.72	0.00	272
chr1:101961170-101961425	ENSRNOT00000027701.0	Fuz	ENSRNOT00000027701	1.48	2.30	2022-03-01	-0.45	5.85	6.39	2.23	0.47	256
chr1:153110785-153120880	ENSRNOT00000046264.0	Haus7	ENSRNOT00000046264	2022-04-03	5.13	2.39	-0.65	6.28	6.32	2022-08-05	0.00	10096
chr1:272272955-272273540	ENSRNOT00000021553.0	Kazald1	ENSRNOT00000021553	2.19	3.58	1.76	-0.43	5.62	6.53	3.17	0.50	586
chr10:13711256-13711730	ENSRNOT00000004249.0	Rab26	ENSRNOT00000004249	1.53	2.69	2022-09-01	-0.43	6.43	6.43	3.19	0.50	475
chr11:67555643-67556578	ENSRNOT00000004315.0	Upk1b	ENSRNOT00000004315	2022-05-02	3.14	1.62	-0.43	6.68	6.25	2022-07-04	0.50	936
chr15:8353215-8353329	ENSRNOT00000010178.0	Mss51	ENSRNOT00000010178	1.62	2.73	1.19	-0.43	5.64	6.44	2.44	0.50	115
chr19:67044916-67045030	ENSRNOT00000029999.0	Gas8	ENSRNOT00000029999	1.48	3.17	2022-05-01	-0.43	6.17	6.73	2022-11-03	0.50	115
chr19:34532034-34532315	ENSRNOT00000004590.0	Il15	ENSRNOT00000004590	2.78	4.22	2022-12-02	-0.65	5.48	2022-12-06	3.58	0.00	282
chr20:6018214-6018462	ENSRNOT00000072458.0	LOC100909593	ENSRNOT00000072458	2.68	4.50	2.35	-0.33	6.45	6.72	2022-03-05	0.80	249
chr20:7302037-7302285	ENSRNOT00000070886.0	RT1-DMa	ENSRNOT00000070886	2.70	4.60	2.37	-0.33	6.44	6.77	2022-07-05	0.80	249
chr7:120752618-120753159	ENSRNOT00000056169.0	Kdelr3	ENSRNOT00000056169	3.43	2022-11-06	3.00	-0.43	2022-01-06	6.84	5.78	0.50	542
chr8:47061095-47061466	ENSRNOT00000010127.0	C1qtnf5	ENSRNOT00000010127	2.45	3.89	1.80	-0.65	5.88	6.54	3.23	0.00	372
chr8:62061665-62062260	ENSRNOT00000025410.0	Rpp25	ENSRNOT00000025410	3.48	5.77	2.82	-0.65	6.72	6.86	5.63	0.00	596
chr14:89132032-89132318	ENSRNOT00000006765.2	Upp1	ENSRNOT00000006765	1.61	2022-02-03	1.27	-0.34	6.63	6.94	3.48	0.77	287
chr13:94348665-94350766	ENSRNOT00000005147.5	Dedd	ENSRNOT00000005147	1.55	2.51	2022-12-01	-0.43	6.41	6.19	3.24	0.50	2102
chr20:278914-282580	ENSRNOT00000076901.5	Tmlhe	ENSRNOT00000076901	1.70	2.78	1.27	-0.43	6.96	6.76	3.48	0.50	3667
chr7:71168140-71172883	ENSRNOT00000072906.4	Tmem194	ENSRNOT00000072906	1.77	2.97	1.43	-0.33	5.51	6.48	2.80	0.80	4744
chr10:45559866-45562744	ENSRNOT00000039012.6	Jmjd4	ENSRNOT00000039012	1.38	2.54	2022-05-01	-0.33	6.43	6.66	2022-11-03	0.80	2879
chr2:204827349-204831295	ENSRNOT00000016329.6	Rps3a	ENSRNOT00000016329	3.15	4.92	2.49	-0.65	6.46	6.20	5.17	0.00	3947
chr17:55120132-55121703	ENSRNOT00000020204.7	Crem	ENSRNOT00000020204	2022-10-02	3.68	1.45	-0.65	6.22	2022-08-06	3.82	0.00	1572
chr5:54584815-54589404	ENSRNOT00000010962.5	Akirin2	ENSRNOT00000010962	1.84	3.69	1.39	-0.45	6.44	6.87	3.72	0.47	4590
chr14:2232866-2242610	ENSRNOT00000000071.7	Pcgf3	ENSRNOT00000000071	1.88	2.51	1.45	-0.43	5.95	6.15	2.81	0.50	9745
chr19:54319762-54320404	ENSRNOT00000074983.2	Mlkl	ENSRNOT00000074983	1.82	3.19	1.39	-0.43	6.25	6.23	3.72	0.50	643
chr1:227379863-227380084	ENSRNOT00000027339.0	Cd248	ENSRNOT00000027339	4.31	2022-08-06	4.00	-0.31	5.25	6.19	5.92	0.77	222
chr10:104477001-104477286	ENSRNOT00000004592.0	Fdxr	ENSRNOT00000004592	2.98	4.29	2.57	-0.41	6.41	6.90	4.31	0.50	286
chr10:13883208-13883231	ENSRNOT00000018405.0	Tbl3	ENSRNOT00000018405	2022-11-02	3.83	1.45	-0.66	6.15	6.81	3.17	0.00	24
chr14:83044288-83045463	ENSRNOT00000023259.0	LOC688176	ENSRNOT00000023259	1.60	2.26	1.19	-0.41	5.51	2022-11-06	2.16	0.50	1176
chr19:63280226-63280344	ENSRNOT00000022091.0	Klhl36	ENSRNOT00000022091	1.86	2.89	1.45	-0.41	6.35	6.58	3.17	0.50	119
chr2:44209577-44210609	ENSRNOT00000040983.0	Zbed3	ENSRNOT00000040983	2.95	3.36	2.64	-0.31	5.79	6.37	3.56	0.77	1033
chr2:266820686-266821133	ENSRNOT00000068683.0	Gbp2	ENSRNOT00000068683	2.91	3.77	2.25	-0.66	5.64	2022-11-06	3.30	0.00	448
chr20:14281734-14282634	ENSRNOT00000001644.0	Pofut2	ENSRNOT00000001644	2.46	3.45	2022-05-02	-0.41	6.66	6.85	3.77	0.50	901
chr6:111632984-111634756	ENSRNOT00000014775.0	Pigh	ENSRNOT00000014775	2022-06-02	2.95	1.40	-0.66	5.89	6.43	2.41	0.00	1773
chr7:119734790-119736243	ENSRNOT00000009551.0	C1qtnf6	ENSRNOT00000009551	2022-05-03	3.76	2.64	-0.41	5.66	6.39	3.53	0.50	1454
chr7:120387071-120388117	ENSRNOT00000015283.0	Sox10	ENSRNOT00000015283	2.13	3.44	1.47	-0.66	5.45	6.43	2.46	0.00	1047
chrX:16545907-16546460	ENSRNOT00000015546.0	Ccdc22	ENSRNOT00000015546	3.33	4.36	2.68	-0.66	6.72	6.60	4.47	0.00	554
chr1:23291657-23293062	ENSRNOT00000019519.5	Enpp1	ENSRNOT00000019519	2.60	2.94	2.19	-0.41	5.86	2022-05-06	3.25	0.50	1406
chr11:65617564-65618921	ENSRNOT00000059666.4	Naa50	ENSRNOT00000059666	2.17	2.67	1.84	-0.32	7.00	6.80	3.61	0.75	1358
chr1:229513908-229515573	ENSRNOT00000028763.4	Mark2	ENSRNOT00000028763	1.51	2022-08-02	2022-09-01	-0.41	6.90	6.85	2.64	0.50	1666
chr1:79111370-79112591	ENSRNOT00000017353.4	Ehd2	ENSRNOT00000017353	2.17	2.55	1.87	-0.31	5.80	6.25	2.89	0.80	1222
chr16:47388388-47390429	ENSRNOT00000030519.4	Cdkn2aip	ENSRNOT00000030519	2.42	3.33	1.76	-0.66	6.39	6.18	3.54	0.00	2042
chr10:76278396-76281596	ENSRNOT00000005064.5	Rnft1	ENSRNOT00000005064	2.41	3.78	1.75	-0.66	6.46	6.71	3.53	0.00	3201
chr2:227612759-227619665	ENSRNOT00000047836.5	Rap1a	ENSRNOT00000047836	2022-06-02	2.69	1.40	-0.66	6.84	6.42	2022-10-03	0.00	6907
chr8:22353661-22354136	ENSRNOT00000075500.2	LOC687183	ENSRNOT00000075500	2022-01-02	3.44	1.59	-0.43	6.36	6.91	3.36	0.47	476
chr14:85055886-85058455	ENSRNOT00000006911.3	Ccdc157	ENSRNOT00000006911	1.76	3.56	1.31	-0.45	5.19	6.86	2.32	0.43	2570
chr1:235215606-235221507	ENSRNOT00000028535.4	Stx3	ENSRNOT00000028535	2.19	3.62	1.76	-0.43	6.35	6.89	3.55	0.47	5902
chr9:78072258-78075055	ENSRNOT00000020414.4	Bard1	ENSRNOT00000020414	2.20	2.32	1.89	-0.31	5.88	2022-07-06	2.92	0.80	2798
chr2:58555083-58559247	ENSRNOT00000013598.4	Ercc8	ENSRNOT00000013598	2.32	2022-04-03	1.91	-0.41	5.86	6.45	2.96	0.50	4165
chr6:120764371-120765509	ENSRNOT00000016479.2	Slirp	ENSRNOT00000016479	2.39	3.60	1.77	-0.62	2022-09-06	6.20	3.55	0.07	1139
chrX:2193436-2195401	ENSRNOT00000014250.3	Syn1	ENSRNOT00000014250	2.30	2022-12-03	1.65	-0.66	6.82	6.51	3.43	0.00	1966
chr12:13832873-13842039	ENSRNOT00000076827.9	Zfp498	ENSRNOT00000076827	1.62	3.39	1.21	-0.41	2022-05-07	6.93	2022-02-04	0.50	9167
chr15:55840569-55853639	ENSRNOT00000013390.11	Polr3d	ENSRNOT00000013390	2.72	3.36	2022-06-02	-0.66	5.81	2022-06-06	2022-11-03	0.00	13071
chr1:224612597-224614068	ENSRNOT00000028329.0	Ano1	ENSRNOT00000028329	3.56	4.53	2.92	-0.64	5.79	6.30	2022-03-04	0.00	1472
chr15:48985571-48986864	ENSRNOT00000022020.0	Scara3	ENSRNOT00000022020	2.72	3.79	2022-08-02	-0.64	5.53	2022-01-06	3.30	0.00	1294
chr15:75353079-75355293	ENSRNOT00000017765.0	Pcdh20	ENSRNOT00000017765	2.32	2.79	1.90	-0.42	5.90	2022-11-06	2022-09-03	0.50	2215
chr4:232744519-232748292	ENSRNOT00000008645.0	Loh12cr1	ENSRNOT00000008645	1.84	2022-03-03	1.53	-0.31	6.24	6.57	3.49	0.80	3774
chr4:153429563-153430680	ENSRNOT00000058626.0	Herc6	ENSRNOT00000058626	2022-04-03	4.21	2.40	-0.64	5.49	2022-11-06	3.60	0.00	1118
chr4:211883405-211885969	ENSRNOT00000011196.0	Olr1	ENSRNOT00000011196	2.57	3.24	1.93	-0.64	5.99	2022-11-06	2022-12-03	0.00	2565
chr7:63737800-63740252	ENSRNOT00000007295.0	Rassf3	ENSRNOT00000007295	4.64	5.86	4.00	-0.64	6.82	6.49	6.19	0.00	2453
chr1:204248724-204250296	ENSRNOT00000022365.3	LOC361646	ENSRNOT00000022365	1.63	2.19	1.33	-0.31	5.56	2022-08-06	2.46	0.80	1573
chr9:95992631-95994400	ENSRNOT00000026312.4	Sh3bp4	ENSRNOT00000026312	1.74	3.27	2022-10-01	-0.64	6.45	6.91	2.81	0.00	1770
chr6:1536118-1538721	ENSRNOT00000007492.4	Prkd3	ENSRNOT00000007492	2.58	3.75	2.16	-0.42	5.61	6.48	3.38	0.50	2604
chr8:131750110-131752271	ENSRNOT00000006554.3	Limd1	ENSRNOT00000006554	1.87	3.15	1.24	-0.64	5.50	6.30	2.35	0.00	2162
chr19:2529266-2530094	ENSRNOT00000018535.2	Cdh11	ENSRNOT00000018535	3.72	5.24	3.30	-0.42	6.42	6.94	5.21	0.50	829
chr6:73874130-73877955	ENSRNOT00000047296.6	Pnpla8	ENSRNOT00000047296	1.53	2.39	1.22	-0.31	6.36	6.55	3.00	0.80	3826
chr11:60644332-60646261	ENSRNOT00000042754.5	Phldb2	ENSRNOT00000042754	2.18	3.68	1.54	-0.64	6.34	6.53	3.50	0.00	1930
chr13:54976999-54979528	ENSRNOT00000042125.3	Pik3c2b	ENSRNOT00000042125	1.44	1.99	2022-02-01	-0.42	5.65	2022-09-06	2022-05-02	0.50	2530
chr5:172788404-172791437	ENSRNOT00000013535.3	Nol9	ENSRNOT00000013535	1.77	2.17	1.35	-0.42	6.00	6.19	2.48	0.50	3034
chr7:93242009-93246663	ENSRNOT00000037809.5	Ext1	ENSRNOT00000037809	2.35	3.37	1.71	-0.64	5.75	6.24	2.88	0.00	4655
chr17:55119736-55121703	ENSRNOT00000068545.6	Crem	ENSRNOT00000068545	2.40	3.68	1.76	-0.64	6.22	2022-08-06	3.82	0.00	1968
chr11:74198381-74201486	ENSRNOT00000050535.8	Fyttd1	ENSRNOT00000050535	2.63	3.43	2.32	-0.31	6.85	6.67	4.41	0.80	3106
chr3:134015509-134020477	ENSRNOT00000034567.5	Tmx4	ENSRNOT00000034567	2.37	3.74	1.95	-0.42	6.56	6.77	2022-03-04	0.50	4969
chr1:57842346-57844328	ENSRNOT00000014552.0	Thbs2	ENSRNOT00000014552	2022-12-04	6.72	3.70	-0.42	6.55	6.85	6.93	0.50	1983
chr3:87114746-87116798	ENSRNOT00000021353.0	Lrp4	ENSRNOT00000021353	1.89	3.83	1.18	-0.70	6.28	6.72	3.39	0.00	2053
chr1:185901428-185903459	ENSRNOT00000042088.2	Spon1	ENSRNOT00000042088	1.78	3.81	1.36	-0.42	5.95	6.40	3.87	0.50	2032
chr17:58365334-58378871	ENSRNOT00000072316.5	Zfp192	ENSRNOT00000072316	2022-08-02	3.88	1.77	-0.32	6.24	6.54	4.36	0.77	13538
chr6:31096649-31097861	ENSRNOT00000047674.2	Ltbp1	ENSRNOT00000047674	1.84	3.26	1.14	-0.70	6.93	6.87	3.31	0.00	1213
chr7:141614786-141617619	ENSRNOT00000016240.3	Znf740	ENSRNOT00000016240	1.82	5.26	1.34	-0.47	6.95	7.54	5.68	2022-01-01	2834
chr10:54498736-54498841	ENSRNOT00000005204.0	Stx8	ENSRNOT00000005204	2.25	4.50	1.84	-0.41	6.66	7.30	2022-02-05	1.17	106
chr2:208849765-208850038	ENSRNOT00000056603.0	RGD1564171	ENSRNOT00000056603	1.78	3.66	1.33	-0.45	6.67	2022-12-07	4.22	2022-01-01	274
chr20:45931980-45932077	ENSRNOT00000036853.0	Fam229b	ENSRNOT00000036853	2.57	5.63	1.81	-0.76	6.74	7.40	4.97	0.00	98
chrX:2179963-2180027	ENSRNOT00000013745.0	Timp1	ENSRNOT00000013745	1.52	4.64	2022-07-01	-0.45	7.32	7.77	5.20	2022-01-01	65
chr14:80371407-80372898	ENSRNOT00000009214.4	Purb	ENSRNOT00000009214	1.79	4.99	1.20	-0.59	7.56	7.47	5.58	0.50	1492
chr18:29198415-29199286	ENSRNOT00000024671.3	Sra1	ENSRNOT00000024671	1.59	4.91	1.00	-0.59	2022-06-07	7.45	2022-02-05	0.50	872
chr5:109183425-109184724	ENSRNOT00000073270.4	Rps6	ENSRNOT00000073270	2.32	2022-03-05	1.73	-0.59	6.85	7.54	4.84	0.50	1300
chr1:102151857-102152103	ENSRNOT00000027944.0	Fcgrt	ENSRNOT00000027944	2.48	3.60	2.17	-0.31	6.90	7.26	4.75	1.51	247
chr10:64778018-64778582	ENSRNOT00000039261.0	Evi2a	ENSRNOT00000039261	3.32	5.60	2.70	-0.62	6.59	7.26	5.44	0.50	565
chr12:24177626-24177682	ENSRNOT00000001894.0	Pcolce	ENSRNOT00000001894	3.64	5.26	3.30	-0.34	6.58	7.19	2022-06-06	1.41	57
chr19:36343741-36343922	ENSRNOT00000011150.0	Ccdc130	ENSRNOT00000011150	1.67	2.67	2022-05-01	-0.62	7.00	2022-06-07	2022-12-03	0.50	182
chr19:38941083-38997654	ENSRNOT00000050888.0	AABR06097983.1	ENSRNOT00000050888	1.70	2.24	1.39	-0.31	6.95	2022-01-07	3.71	1.52	56572
chr5:69275963-69276862	ENSRNOT00000009678.0	Mrpl50	ENSRNOT00000009678	2.95	5.32	2.32	-0.63	7.76	7.40	6.15	0.47	900
chr5:151552470-151552590	ENSRNOT00000075659.0	Ccdc28b	ENSRNOT00000075659	1.39	2.72	2022-02-01	-0.37	7.82	7.75	2022-10-04	1.30	121
chr7:142925731-142926629	ENSRNOT00000055271.0	Ppp1r1a	ENSRNOT00000055271	2.17	5.25	1.54	-0.62	2022-06-07	7.78	2022-04-05	0.50	899
chr8:103774031-103774901	ENSRNOT00000015821.0	Rnf7	ENSRNOT00000015821	1.45	2.79	2022-08-01	-0.37	8.00	7.85	4.24	1.30	871
chr10:64016373-64017369	ENSRNOT00000008697.3	Rph3al	ENSRNOT00000008697	1.66	3.71	1.21	-0.45	7.48	7.72	4.48	2022-01-01	997
chr10:83956488-83957468	ENSRNOT00000010724.2	Hoxb5	ENSRNOT00000010724	1.86	4.36	2022-03-01	-0.83	7.53	7.77	2022-11-04	0.00	981
chr11:41388211-41394841	ENSRNOT00000002679.5	Bace2	ENSRNOT00000002679	2.73	2022-01-04	2.21	-0.51	5.87	7.00	3.67	0.80	6631
chr8:13807116-13825881	ENSRNOT00000014605.4	Taf1d	ENSRNOT00000014605	2022-08-02	4.67	1.25	-0.83	7.60	7.71	4.56	0.00	18766
chr11:40003705-40005468	ENSRNOT00000075762.4	LOC100911295	ENSRNOT00000075762	1.94	4.47	2022-11-01	-0.83	7.24	7.43	4.28	0.00	1764
chr3:154190591-154191671	ENSRNOT00000032881.3	Nrsn2	ENSRNOT00000032881	1.90	4.31	1.54	-0.37	7.28	7.87	2022-03-05	1.30	1081
chr1:281670397-281671441	ENSRNOT00000018889.0	Dusp5	ENSRNOT00000018889	2.20	3.90	1.62	-0.58	7.93	7.63	4.70	0.50	1045
chr11:91401397-91401498	ENSRNOT00000002524.0	Top3b	ENSRNOT00000002524	1.69	2.69	2022-11-01	-0.58	6.66	7.18	2.67	0.50	102
chr2:162145055-162146115	ENSRNOT00000019057.0	Lhfp	ENSRNOT00000019057	3.16	5.82	2.59	-0.58	7.56	7.84	2022-04-06	0.50	1061
chr2:222757658-222757785	ENSRNOT00000043146.0	Trim45	ENSRNOT00000043146	2.81	3.86	2.23	-0.58	6.70	2022-12-07	3.95	0.50	128
chr3:167605023-167605882	ENSRNOT00000023965.0	Mmp9	ENSRNOT00000023965	1.82	3.20	1.44	-0.38	7.24	2022-03-07	4.41	2022-01-01	860
chr3:78681826-78682047	ENSRNOT00000009817.0	Serping1	ENSRNOT00000009817	1.92	3.41	1.34	-0.58	6.32	7.21	2022-02-03	0.50	222
chr6:85708756-85708813	ENSRNOT00000009304.0	RGD1305089	ENSRNOT00000009304	1.77	3.65	1.31	-0.46	2022-10-07	7.35	4.20	0.80	58
chr6:133186864-133187079	ENSRNOT00000005167.0	Tdp1	ENSRNOT00000005167	1.74	3.90	1.28	-0.46	7.30	7.86	4.14	0.80	216
chr7:54273312-54274294	ENSRNOT00000005361.0	Phlda1	ENSRNOT00000005361	1.89	3.76	2022-05-01	-0.84	7.74	7.76	3.73	0.00	983
chrX:15053410-15054040	ENSRNOT00000067603.0	RPGR	ENSRNOT00000067603	2.58	3.46	2.24	-0.33	6.93	7.58	3.97	1.17	631
chr1:63833863-63834065	ENSRNOT00000075663.2	LOC102552284	ENSRNOT00000075663	2022-06-02	3.55	1.48	-0.58	6.30	7.16	3.20	0.50	203
chr13:37482090-37483993	ENSRNOT00000044628.6	Cdh19	ENSRNOT00000044628	2.44	3.29	2022-06-02	-0.38	6.97	7.50	3.77	2022-01-01	1904
chr7:108699051-108701044	ENSRNOT00000007564.6	Phf20l1	ENSRNOT00000007564	4.39	5.92	4.00	-0.39	6.97	7.39	6.48	0.99	1994
chrX:15391317-15393800	ENSRNOT00000038994.4	Cybb	ENSRNOT00000038994	1.59	3.35	1.21	-0.38	7.45	7.79	2022-02-04	2022-01-01	2484
chr14:12301928-12306516	ENSRNOT00000038872.4	Bmp3	ENSRNOT00000038872	1.75	3.41	1.42	-0.33	7.55	7.74	4.38	1.17	4589
chr3:167985903-167986685	ENSRNOT00000025238.2	Slc35c2	ENSRNOT00000025238	1.50	3.21	2022-11-01	-0.38	7.62	7.99	3.85	2022-01-01	783
chr5:151227543-151232715	ENSRNOT00000029177.5	Rbbp4	ENSRNOT00000029177	1.53	3.63	2022-07-01	-0.46	7.20	7.86	3.77	0.80	5173
chr10:45909133-45910416	ENSRNOT00000004412.4	Flcn	ENSRNOT00000004412	2.74	2022-10-04	1.91	-0.84	6.84	7.27	3.67	0.00	1284
chr14:12996713-12997503	ENSRNOT00000002746.2	Prdm8	ENSRNOT00000002746	1.63	2022-02-03	1.17	-0.46	7.23	2022-08-07	3.96	0.80	791
chr15:60506225-60508502	ENSRNOT00000047192.5	Lrch1	ENSRNOT00000047192	1.65	2.92	1.27	-0.38	7.85	7.65	4.13	2022-01-01	2278
chr6:155998736-156003758	ENSRNOT00000066545.6	Itgb8	ENSRNOT00000066545	1.42	2022-10-02	2022-09-01	-0.33	6.83	7.47	2.63	1.17	5023
chr5:89007799-89013190	ENSRNOT00000007578.5	Brinp1	ENSRNOT00000007578	2.28	2022-11-04	1.45	-0.84	6.25	7.20	3.17	0.00	5392
chr1:199632492-199633575	ENSRNOT00000016418.2	Prkcb	ENSRNOT00000016418	1.99	3.83	1.41	-0.58	6.13	7.34	2022-12-03	0.50	1084
chr1:171372634-171373091	ENSRNOT00000022879.1	Lipt2	ENSRNOT00000022879	1.50	3.29	1.17	-0.33	7.50	7.99	3.95	1.17	458
chr3:180594342-180598472	ENSRNOT00000019545.3	Lime1	ENSRNOT00000019545	1.53	3.19	2022-07-01	-0.46	7.71	7.93	3.76	0.80	4131
chr7:128418310-128420391	ENSRNOT00000074625.5	Fam19a5	ENSRNOT00000074625	2.18	2022-12-03	1.60	-0.58	6.85	2022-10-07	3.37	0.50	2082
chr6:36602922-36607188	ENSRNOT00000009565.5	Preb	ENSRNOT00000009565	2.71	4.00	1.88	-0.84	6.75	2022-10-07	3.64	0.00	4267
chr14:59526528-59531614	ENSRNOT00000004030.4	Tbc1d19	ENSRNOT00000004030	1.91	2.67	1.45	-0.46	6.96	7.25	3.17	0.80	5087
chr18:51040040-51041008	ENSRNOT00000039177.3	Mar.03	ENSRNOT00000039177	2.31	3.70	1.73	-0.58	6.87	7.58	3.50	0.50	969
chr1:33507101-33509554	ENSRNOT00000021898.0	Nkd2	ENSRNOT00000021898	1.95	3.31	1.65	-0.30	2022-08-06	2022-01-07	3.68	1.30	2454
chr1:181920662-181922717	ENSRNOT00000013276.0	Swap70	ENSRNOT00000013276	1.67	3.48	2022-10-01	-0.57	7.84	7.85	3.98	0.50	2056
chr10:66217748-66219980	ENSRNOT00000045107.0	Fam222b	ENSRNOT00000045107	1.76	3.38	1.46	-0.30	7.27	7.31	4.65	1.30	2233
chr10:69956875-69957391	ENSRNOT00000076618.0	Slfn13	ENSRNOT00000076618	1.52	3.26	1.13	-0.39	7.70	7.93	2022-04-04	2022-01-01	517
chr13:84804759-84805255	ENSRNOT00000047799.0	Dnm3	ENSRNOT00000047799	1.99	2022-03-03	1.43	-0.57	6.99	7.20	3.32	0.50	497
chr14:45832302-45847085	ENSRNOT00000076611.0	Rell1	ENSRNOT00000076611	1.34	1.85	2022-04-01	-0.30	7.73	2022-04-07	3.84	1.30	14784
chr6:7357987-7359842	ENSRNOT00000006725.0	LOC100911319	ENSRNOT00000006725	3.35	4.47	2022-05-03	-0.30	6.83	7.57	2022-04-05	1.30	1856
chr6:85333776-85334510	ENSRNOT00000009080.0	Baz1a	ENSRNOT00000009080	1.84	2.80	2022-04-01	-0.80	6.91	2022-01-07	2.70	0.00	735
chr8:116625111-116625217	ENSRNOT00000072098.0	Lamb2	ENSRNOT00000072098	3.87	5.53	3.30	-0.57	6.87	7.69	5.22	0.50	107
chr8:117972419-117972590	ENSRNOT00000056145.0	Ptpn23	ENSRNOT00000056145	2022-07-02	3.99	1.27	-0.80	6.91	7.82	2022-08-03	0.00	172
chr3:118364501-118366726	ENSRNOT00000009430.4	Mapkbp1	ENSRNOT00000009430	2.39	4.75	2.00	-0.39	7.65	7.94	5.47	2022-01-01	2226
chr7:2714077-2714951	ENSRNOT00000050792.5	Pan2	ENSRNOT00000050792	1.72	2.82	1.26	-0.46	5.98	7.21	2.38	0.80	875
chr8:60364729-60373545	ENSRNOT00000058685.4	Sin3a	ENSRNOT00000058685	1.95	3.98	1.49	-0.46	7.23	7.29	4.71	0.80	8817
chr13:74075355-74078820	ENSRNOT00000003320.4	Fam129a	ENSRNOT00000003320	4.46	5.42	4.00	-0.46	6.98	7.66	5.55	0.80	3466
chr4:64687549-64692514	ENSRNOT00000017338.5	Creb3l2	ENSRNOT00000017338	2.29	4.24	1.91	-0.39	7.39	7.30	5.34	2022-01-01	4966
chr19:54089179-54104845	ENSRNOT00000024248.7	St3gal2	ENSRNOT00000024248	1.99	4.16	1.65	-0.34	7.15	7.51	4.97	1.17	15667
chr1:92417042-92421571	ENSRNOT00000028703.6	Cebpg	ENSRNOT00000028703	1.72	3.50	1.15	-0.57	7.68	7.60	2022-09-04	0.50	4530
chr16:68768540-68769893	ENSRNOT00000017776.4	Gpr124	ENSRNOT00000017776	3.35	6.39	2.89	-0.46	7.22	7.77	6.62	0.77	1354
chr5:21565875-21570660	ENSRNOT00000011721.7	Plag1	ENSRNOT00000011721	2.82	5.82	2022-02-02	-0.80	7.26	7.57	5.52	0.00	4786
chr1:86575544-86578830	ENSRNOT00000026839.5	Samd4b	ENSRNOT00000026839	1.69	2.75	1.21	-0.48	6.70	7.20	2.99	0.75	3287
chr10:93978611-93979931	ENSRNOT00000010816.4	Kcnh6	ENSRNOT00000010816	1.91	4.23	1.34	-0.57	7.47	7.75	4.45	0.50	1321
chr10:103768022-103771906	ENSRNOT00000007362.4	Sap30bp	ENSRNOT00000007362	1.36	2.48	2022-06-01	-0.30	7.84	7.73	3.89	1.30	3885
chr19:23583430-23618518	ENSRNOT00000064105.7	Large	ENSRNOT00000064105	1.64	3.56	1.23	-0.41	7.48	7.72	4.25	0.93	35089
chr13:84804931-84805255	ENSRNOT00000064219.1	Dnm3	ENSRNOT00000064219	1.98	2022-06-03	1.41	-0.57	6.74	2022-01-07	3.30	0.50	325
chr11:72103710-72105547	ENSRNOT00000067060.0	Mylk	ENSRNOT00000067060	1.82	3.52	1.28	-0.55	7.32	7.58	3.76	0.50	1838
chr7:129821099-129821884	ENSRNOT00000010467.0	Plxnb2	ENSRNOT00000010467	1.74	3.71	1.20	-0.55	6.68	7.46	3.43	0.50	786
chr8:86584556-86585362	ENSRNOT00000051159.0	Col12a1	ENSRNOT00000051159	1.41	2.81	2022-07-01	-0.34	6.56	7.46	3.21	1.30	807
chr6:7364082-7365946	ENSRNOT00000038246.4	Thada	ENSRNOT00000038246	2.36	4.62	1.66	-0.70	6.76	7.18	4.20	0.00	1865
chr14:81793604-81797272	ENSRNOT00000058166.6	Htt	ENSRNOT00000058166	2.40	3.19	1.47	-0.93	6.88	7.52	2.55	0.00	3669
chr1:90165072-90165155	ENSRNOT00000028413.0	Lin37	ENSRNOT00000028413	2.34	6.29	1.52	-0.82	7.36	2022-11-08	6.34	0.80	84
chr1:220671382-220671517	ENSRNOT00000020216.0	Ifitm2	ENSRNOT00000020216	1.89	2022-02-04	1.13	-0.76	6.84	2022-08-08	3.79	2022-01-01	136
chr15:41659483-41668261	ENSRNOT00000075884.1	N6amt2	ENSRNOT00000075884	1.94	4.88	1.27	-0.67	7.59	8.00	5.74	1.27	8779
chr1:231876067-231876109	ENSRNOT00000066823.0	Wdr74	ENSRNOT00000066823	1.88	4.69	1.38	-0.50	8.77	8.86	2022-10-06	1.51	43
chr1:268845905-268845919	ENSRNOT00000064160.0	Marveld1	ENSRNOT00000064160	2.39	5.57	1.91	-0.47	8.83	8.83	7.16	1.59	15
chr1:102493177-102493259	ENSRNOT00000028217.0	Ruvbl2	ENSRNOT00000028217	1.54	4.27	2022-04-01	-0.50	8.28	8.72	5.33	1.51	83
chr10:65623911-65624309	ENSRNOT00000011019.0	Fam58b	ENSRNOT00000011019	1.85	3.82	1.25	-0.60	7.90	8.34	4.55	1.17	399
chr20:42532073-42532381	ENSRNOT00000001081.0	Smpdl3a	ENSRNOT00000001081	1.72	2022-06-04	2022-06-01	-0.66	7.38	8.28	4.16	2022-01-01	309
chr4:185687206-185687382	ENSRNOT00000018339.0	Ruvbl1	ENSRNOT00000018339	1.81	4.44	1.28	-0.53	8.61	8.57	5.89	1.41	177
chr6:58574667-58574823	ENSRNOT00000068208.0	Sh3yl1	ENSRNOT00000068208	1.51	2022-07-04	2022-02-01	-0.50	8.26	8.57	5.27	1.51	157
chr7:28917628-28917928	ENSRNOT00000006903.0	Ccdc53	ENSRNOT00000006903	1.88	3.64	1.38	-0.50	7.72	2022-08-08	4.79	1.51	301
chr7:11945541-11945650	ENSRNOT00000026202.0	Sf3a2	ENSRNOT00000026202	1.61	2.91	1.24	-0.37	7.63	2022-01-08	4.54	2022-01-02	110
chr10:10637418-10640614	ENSRNOT00000075238.4	Naa60	ENSRNOT00000075238	2022-03-02	4.90	1.43	-0.60	8.68	8.56	6.19	1.17	3197
chr8:48880437-48885039	ENSRNOT00000024828.5	Pafah1b2	ENSRNOT00000024828	2022-11-02	4.44	1.45	-0.66	7.88	8.43	4.90	2022-01-01	4603
chr2:108120857-108121765	ENSRNOT00000044847.4	E2f5	ENSRNOT00000044847	2.28	5.87	1.24	-1.04	9.34	8.43	6.78	0.00	909
chr15:111820177-111820779	ENSRNOT00000057469.2	Ubac2	ENSRNOT00000057469	1.87	4.24	1.50	-0.37	8.55	8.48	6.31	2.00	603
chr15:111820178-111821085	ENSRNOT00000016986.0	Ubac2	ENSRNOT00000016986	1.97	4.22	1.51	-0.46	8.16	2022-04-08	5.73	1.40	908
chr2:140811916-140813001	ENSRNOT00000016236.0	Sox2	ENSRNOT00000016236	2.38	4.64	1.84	-0.54	7.33	2022-10-08	2022-03-05	1.17	1086
chr20:15833653-15834396	ENSRNOT00000031400.0	Mmp11	ENSRNOT00000031400	2.29	4.79	1.62	-0.67	7.35	8.23	4.71	0.80	744
chr3:87591105-87591785	ENSRNOT00000007771.0	Creb3l1	ENSRNOT00000007771	2.30	4.77	1.76	-0.54	7.46	8.47	4.93	1.17	681
chr9:93886202-93886547	ENSRNOT00000025779.0	Dis3l2	ENSRNOT00000025779	1.71	3.39	1.17	-0.54	7.42	2022-02-08	3.96	1.17	346
chr1:170503458-170504151	ENSRNOT00000022983.1	Serpinh1	ENSRNOT00000022983	2.72	5.73	2.38	-0.34	8.22	8.81	6.94	1.80	694
chr1:89088267-89092663	ENSRNOT00000074299.7	LOC102547059	ENSRNOT00000074299	2.22	5.23	1.62	-0.60	8.55	8.86	5.93	2022-01-01	4397
chr1:89493397-89497793	ENSRNOT00000072762.7	LOC102547059	ENSRNOT00000072762	2.19	5.15	1.60	-0.60	8.46	8.73	5.88	2022-01-01	4397
chr7:71135822-71136790	ENSRNOT00000039306.3	Stat6	ENSRNOT00000039306	1.73	4.40	1.19	-0.54	8.20	8.61	5.14	1.15	969
chr1:172170197-172170701	ENSRNOT00000050227.1	P2ry6	ENSRNOT00000050227	2022-05-02	3.66	1.59	-0.46	7.97	8.37	4.67	1.41	505
chr2:204077214-204078285	ENSRNOT00000075823.4	Pet112l	ENSRNOT00000075823	1.56	2022-01-03	1.15	-0.40	7.72	8.40	3.93	1.59	1072
chr11:48201267-48204449	ENSRNOT00000060838.7	Col8a1	ENSRNOT00000060838	3.47	5.32	2022-05-03	-0.43	7.89	2022-04-08	6.68	1.51	3183
chr2:147130409-147133391	ENSRNOT00000072675.6	Intu	ENSRNOT00000072675	1.82	3.30	1.39	-0.43	7.91	8.40	4.32	1.51	2983
chr3:116421919-116423895	ENSRNOT00000070912.2	Thbs1	ENSRNOT00000070912	2022-08-04	7.33	3.30	-0.78	7.86	8.48	7.22	0.50	1977
chr13:61258166-61263534	ENSRNOT00000043907.5	Dennd1b	ENSRNOT00000043907	1.45	3.37	2022-10-01	-0.35	8.60	8.83	4.91	1.78	5369
chr2:47094169-47099018	ENSRNOT00000052072.9	Gfm2	ENSRNOT00000052072	2.00	3.54	1.51	-0.49	7.70	8.00	4.53	1.30	4850
chr1:229331252-229338916	ENSRNOT00000030625.7	Flrt1	ENSRNOT00000030625	2.14	3.49	1.47	-0.67	6.96	2022-06-08	3.19	0.80	7665
chr2:41944033-41945343	ENSRNOT00000016135.4	Papd4	ENSRNOT00000016135	2.16	4.23	1.38	-0.78	7.70	8.14	4.29	0.50	1311
chr2:148123655-148124005	ENSRNOT00000019256.2	Sclt1	ENSRNOT00000019256	2022-04-02	3.93	1.26	-0.78	7.69	2022-01-08	2022-11-04	0.50	351
chr6:33414344-33418219	ENSRNOT00000006190.6	Ppp1cb	ENSRNOT00000006190	2.78	5.57	2.43	-0.34	8.52	8.88	2022-01-07	1.80	3876
chr1:212899587-212904289	ENSRNOT00000024974.5	Adam12	ENSRNOT00000024974	2022-04-04	6.73	3.70	-0.34	7.79	8.71	7.61	1.80	4703
chr1:136799856-136802249	ENSRNOT00000043854.6	Slco3a1	ENSRNOT00000043854	1.86	3.94	1.48	-0.38	8.93	8.87	5.67	1.67	2394
chr9:63262573-63265308	ENSRNOT00000049259.7	Satb2	ENSRNOT00000049259	1.55	3.20	1.20	-0.34	8.96	8.80	5.16	1.80	2736
chr17:12724507-12725168	ENSRNOT00000044559.4	Simc1	ENSRNOT00000044559	1.53	2.76	2022-10-01	-0.43	7.79	8.23	3.82	1.49	662
chr16:3074970-3075034	ENSRNOT00000072414.1	Ccdc66	ENSRNOT00000072414	2022-02-02	4.25	1.22	-0.80	7.36	2022-03-08	2022-04-04	0.47	65
chr1:228697679-228697908	ENSRNOT00000037583.1	Men1	ENSRNOT00000037583	1.99	2022-01-04	1.21	-0.78	7.98	8.48	2022-02-04	0.50	230
chr1:79133679-79134463	ENSRNOT00000015059.0	Gltscr1	ENSRNOT00000015059	1.83	3.95	1.14	-0.68	7.46	8.14	2022-07-04	0.80	785
chr12:15666433-15668304	ENSRNOT00000001458.0	Rnf216	ENSRNOT00000001458	2022-02-02	2022-01-04	1.61	-0.41	7.74	8.36	4.90	1.51	1872
chr14:6581342-6583291	ENSRNOT00000002916.0	Pkd2	ENSRNOT00000002916	2.56	5.25	1.96	-0.60	7.64	8.47	5.42	2022-01-01	1950
chr16:21278077-21278288	ENSRNOT00000015247.0	Atp13a1	ENSRNOT00000015247	1.86	4.53	2022-04-01	-0.83	8.15	8.49	4.69	0.50	212
chr2:84126814-84128487	ENSRNOT00000040348.0	Rai14	ENSRNOT00000040348	2.39	5.73	1.56	-0.83	8.28	8.70	5.82	0.50	1674
chr20:14958777-14959214	ENSRNOT00000001695.0	Col6a2	ENSRNOT00000001695	1.99	4.70	1.31	-0.68	7.24	8.35	4.39	0.80	438
chr3:18111129-18114523	ENSRNOT00000075029.0	Mvb12b	ENSRNOT00000075029	1.91	4.39	1.23	-0.68	7.54	8.47	4.26	0.80	3395
chr4:27562607-27563064	ENSRNOT00000038136.0	Pex1	ENSRNOT00000038136	2022-10-02	4.63	1.50	-0.61	8.89	8.80	5.71	0.99	458
chr5:63468743-63469304	ENSRNOT00000023695.0	Tesk1	ENSRNOT00000023695	1.73	4.56	1.13	-0.60	8.26	8.90	4.92	2022-01-01	562
chr20:15622423-15626100	ENSRNOT00000071486.4	LOC100909461	ENSRNOT00000071486	2022-03-02	4.89	1.59	-0.44	8.38	8.79	5.88	1.41	3678
chr20:15635312-15638548	ENSRNOT00000033298.4	Zfp280b	ENSRNOT00000033298	2022-08-02	2022-01-05	1.64	-0.44	8.47	8.91	5.98	1.41	3237
chr8:12283395-12286843	ENSRNOT00000008566.6	Mtmr2	ENSRNOT00000008566	1.83	2022-10-04	2022-01-01	-0.83	8.14	2022-11-08	4.63	0.50	3449
chr19:30729009-30731049	ENSRNOT00000020700.3	Adcy7	ENSRNOT00000020700	1.77	3.57	1.36	-0.41	8.94	8.58	5.44	1.51	2041
chr4:19167427-19171101	ENSRNOT00000009489.6	Sema3d	ENSRNOT00000009489	1.57	3.25	1.24	-0.33	8.20	2022-10-08	5.15	1.80	3675
chr5:170636091-170642348	ENSRNOT00000023543.6	H6pd	ENSRNOT00000023543	1.64	2022-08-03	2022-04-01	-0.60	7.92	8.16	3.85	2022-01-01	6258
chr3:66632595-66635486	ENSRNOT00000024922.5	Wipf1	ENSRNOT00000024922	1.39	2022-10-03	2022-05-01	-0.34	8.25	8.34	4.74	1.74	2892
chr4:165245344-165249359	ENSRNOT00000019713.8	Tgoln2	ENSRNOT00000019713	1.49	3.71	2022-04-01	-0.45	8.56	8.94	4.72	1.39	4016
chr2:84126814-84128336	ENSRNOT00000046215.2	Rai14	ENSRNOT00000046215	2.30	5.39	1.47	-0.83	8.67	8.89	5.67	0.50	1523
chr1:192294073-192297034	ENSRNOT00000055120.0	Pik3c2a	ENSRNOT00000055120	2.97	4.42	2.44	-0.52	7.71	2022-03-08	5.26	1.17	2962
chr1:147327952-147331956	ENSRNOT00000017636.0	Arnt2	ENSRNOT00000017636	1.97	3.65	1.41	-0.57	7.87	8.57	3.97	2022-01-01	4005
chr1:264066775-264067290	ENSRNOT00000021546.2	Myof	ENSRNOT00000021546	1.34	3.58	2022-01-01	-0.33	2022-10-08	8.44	5.23	2.00	516
chr3:124094447-124095448	ENSRNOT00000056022.4	Fbn1	ENSRNOT00000056022	2.83	6.89	2.44	-0.38	8.74	8.96	8.41	1.74	1002
chr10:101974364-101978492	ENSRNOT00000065145.2	Sdk2	ENSRNOT00000065145	1.35	2.29	2022-01-01	-0.34	7.79	8.77	3.27	1.96	4129
chr2:209429808-209430124	ENSRNOT00000016034.0	S100a3	ENSRNOT00000016034	1.80	6.14	2022-09-01	-0.70	9.45	9.42	8.37	2.21	317
chr1:274714591-274714695	ENSRNOT00000027614.0	Obfc1	ENSRNOT00000027614	1.50	2022-07-03	1.19	-0.31	8.88	9.30	5.70	2022-05-03	105
chr10:94984715-94985409	ENSRNOT00000065589.0	RGD1565033	ENSRNOT00000065589	1.98	5.41	1.41	-0.56	9.45	9.75	7.17	2022-07-02	695
chr10:56324104-56324318	ENSRNOT00000032481.0	Elp5	ENSRNOT00000032481	1.90	4.62	2022-07-01	-0.82	8.84	9.34	5.42	1.30	215
chr13:89476478-89476792	ENSRNOT00000005090.0	Tada1	ENSRNOT00000005090	1.75	2022-06-04	2022-06-01	-0.69	8.97	9.31	5.39	1.67	315
chr16:74102247-74102396	ENSRNOT00000015790.0	Mrps31	ENSRNOT00000015790	1.43	3.81	2022-10-01	-0.33	9.52	9.86	6.41	2.95	150
chr18:47585436-47586068	ENSRNOT00000023485.0	Ppic	ENSRNOT00000023485	3.18	2022-06-08	2.55	-0.63	9.14	9.79	9.26	1.86	633
chr8:115651589-115651868	ENSRNOT00000031739.0	Cyb561d2	ENSRNOT00000031739	1.35	3.51	1.00	-0.34	2022-11-09	9.32	6.18	2.89	280
chr11:48665701-48666114	ENSRNOT00000029420.2	Nit2	ENSRNOT00000029420	2.50	5.53	1.96	-0.54	8.63	2022-05-09	7.26	2.15	414
chr10:75668665-75669482	ENSRNOT00000036098.5	Ska2	ENSRNOT00000036098	1.97	5.21	1.28	-0.69	2022-08-09	2022-09-09	6.87	1.67	818
chr7:117380345-117381267	ENSRNOT00000016464.2	Exosc4	ENSRNOT00000016464	2.38	5.29	1.64	-0.75	8.85	2022-04-09	6.61	1.51	923
chr7:3214360-3214949	ENSRNOT00000044292.2	Ormdl2	ENSRNOT00000044292	1.99	4.73	1.17	-0.82	9.00	9.40	5.63	1.30	590
chr1:208581010-208581539	ENSRNOT00000027860.0	Htra1	ENSRNOT00000027860	3.23	5.47	2.92	-0.31	8.53	2022-10-09	7.70	2.80	530
chr1:221242310-221243404	ENSRNOT00000032904.0	Tmem80	ENSRNOT00000032904	1.72	2022-02-04	1.30	-0.42	9.19	9.19	6.38	2.36	1095
chr19:67497411-67499125	ENSRNOT00000058652.0	RGD1563991	ENSRNOT00000058652	2.32	5.71	1.46	-0.86	9.52	9.69	6.71	1.17	1715
chr19:67497411-67498361	ENSRNOT00000024491.0	RGD1563991	ENSRNOT00000024491	2.32	5.71	1.46	-0.86	9.52	9.69	6.71	1.17	951
chr2:254963069-254965342	ENSRNOT00000055570.0	Cyp2u1	ENSRNOT00000055570	2.70	4.75	2.39	-0.31	8.88	9.46	6.97	2.80	2274
chr20:33152565-33153203	ENSRNOT00000033529.0	H2afy2	ENSRNOT00000033529	1.97	3.98	1.51	-0.46	8.93	9.40	5.73	2.22	639
chr5:176767286-176768533	ENSRNOT00000067252.0	Mxra8	ENSRNOT00000067252	3.44	6.46	2.72	-0.72	8.73	9.30	7.40	1.51	1248
chr8:131164596-131164782	ENSRNOT00000040625.0	Zfp105	ENSRNOT00000040625	1.86	4.39	1.33	-0.53	2022-03-09	9.00	6.43	2022-01-02	187
chr9:28898901-28899282	ENSRNOT00000075592.0	B3gat2	ENSRNOT00000075592	4.26	7.39	3.40	-0.86	8.54	2022-04-09	2022-06-08	1.17	382
chrX:15831424-15831751	ENSRNOT00000006491.0	Porcn	ENSRNOT00000006491	1.51	3.39	2022-07-01	-0.44	9.43	9.29	5.81	2.29	328
chrX:15871237-15871454	ENSRNOT00000007130.0	Tbc1d25	ENSRNOT00000007130	1.89	4.14	2022-03-01	-0.86	8.50	2022-05-09	4.75	1.17	218
chr14:34282763-34289478	ENSRNOT00000002981.8	LOC100911602	ENSRNOT00000002981	1.44	3.51	2022-04-01	-0.41	9.59	9.76	5.75	2.41	6716
chr13:76165785-76167655	ENSRNOT00000032157.5	Rnasel	ENSRNOT00000032157	1.50	3.59	1.19	-0.31	9.53	9.82	2022-11-06	2.80	1871
chr20:25085116-25089143	ENSRNOT00000067920.5	Reep3	ENSRNOT00000067920	2.67	5.86	2.36	-0.32	9.35	9.78	8.20	2.77	4028
chr10:58359661-58363191	ENSRNOT00000071764.6	Pitpnm3	ENSRNOT00000071764	2022-07-02	4.69	1.39	-0.68	9.48	9.21	6.55	1.59	3531
chr3:54187807-54188412	ENSRNOT00000011794.2	Tank	ENSRNOT00000011794	2022-10-02	4.81	1.42	-0.68	8.22	2022-02-09	5.60	1.59	606
chr11:74282105-74284326	ENSRNOT00000046530.4	RGD1305422	ENSRNOT00000046530	1.73	4.47	1.27	-0.46	9.52	9.93	6.30	2.24	2222
chr5:173034532-173039283	ENSRNOT00000014625.5	Icmt	ENSRNOT00000014625	1.84	4.57	1.28	-0.57	9.55	9.70	6.32	1.90	4752
chr6:60213866-60216313	ENSRNOT00000031371.3	Asap2	ENSRNOT00000031371	1.60	3.49	1.21	-0.39	8.35	2022-12-09	5.17	2.45	2448
chr5:168378899-168379751	ENSRNOT00000010433.3	Plod1	ENSRNOT00000010433	2.23	5.43	1.76	-0.48	9.41	9.77	7.24	2.17	853
chr10:89145849-89147314	ENSRNOT00000031208.4	Rundc1	ENSRNOT00000031208	2.55	5.13	1.87	-0.68	8.80	9.24	6.29	1.59	1466
chr14:107855904-107859564	ENSRNOT00000012847.7	Cct4	ENSRNOT00000012847	1.73	4.36	1.27	-0.47	9.28	9.56	6.28	2.21	3661
chr1:88439887-88441598	ENSRNOT00000042207.0	Sipa1l3	ENSRNOT00000042207	2.54	2022-05-06	1.93	-0.61	2022-08-09	9.56	7.24	1.67	1712
chr15:32538672-32540247	ENSRNOT00000017730.0	Sall2	ENSRNOT00000017730	1.64	3.91	1.20	-0.43	9.71	9.86	5.94	2.17	1576
chr2:209074841-209075586	ENSRNOT00000049810.0	Dennd4b	ENSRNOT00000049810	1.66	4.53	1.24	-0.42	9.18	9.87	2022-05-06	2.21	746
chr5:126556239-126559155	ENSRNOT00000066041.0	Mier1	ENSRNOT00000066041	2.25	4.86	1.61	-0.64	8.67	9.19	5.93	1.59	2917
chr5:146566268-146566949	ENSRNOT00000067762.0	Inpp5b	ENSRNOT00000067762	2.17	4.85	1.56	-0.61	8.99	9.70	5.82	1.67	682
chr8:116731513-116733593	ENSRNOT00000042577.0	Arih2	ENSRNOT00000042577	2022-10-02	4.97	1.39	-0.71	2022-09-09	9.15	6.32	1.41	2081
chrX:123605221-123607907	ENSRNOT00000016993.0	RGD1564541	ENSRNOT00000016993	2.35	5.17	1.58	-0.77	8.90	9.49	5.84	1.27	2687
chr13:39793711-39801261	ENSRNOT00000003280.5	Tfcp2l1	ENSRNOT00000003280	2.28	5.31	1.61	-0.67	9.67	9.75	6.74	1.51	7551
chr8:25614105-25616610	ENSRNOT00000036738.4	Dpy19l1	ENSRNOT00000036738	2.90	5.47	2.32	-0.58	8.86	2022-04-09	2022-03-07	1.74	2506
chr2:63877476-63877714	ENSRNOT00000013854.2	Dhx29	ENSRNOT00000013854	2.30	4.76	1.74	-0.56	8.87	9.30	6.13	1.80	239
chr9:113260899-113264116	ENSRNOT00000017915.4	LOC100910454	ENSRNOT00000017915	1.91	4.39	1.48	-0.43	9.81	9.86	6.50	2.17	3218
chr14:45404198-45405700	ENSRNOT00000029209.4	Tbc1d1	ENSRNOT00000029209	1.72	4.34	1.29	-0.43	9.45	9.81	6.15	2.17	1503
chr4:186011499-186014064	ENSRNOT00000029125.4	Mgll	ENSRNOT00000029125	1.88	4.81	2022-06-01	-0.83	8.64	9.86	4.76	1.17	2566
chr11:91850040-91855356	ENSRNOT00000002491.9	Fgd4	ENSRNOT00000002491	1.91	4.36	1.48	-0.44	9.46	9.50	6.49	2.16	5317
chr16:8374103-8375138	ENSRNOT00000027071.2	Parg	ENSRNOT00000027071	1.51	3.56	2022-09-01	-0.42	9.25	9.32	5.68	2.20	1036
chr7:64191846-64196671	ENSRNOT00000006180.6	Srgap1	ENSRNOT00000006180	1.79	4.00	1.32	-0.48	8.34	2022-04-09	5.33	2022-03-02	4826
chr2:105473761-105480370	ENSRNOT00000016506.0	Sema5a	ENSRNOT00000016506	1.72	2022-12-03	1.32	-0.40	9.24	9.43	2022-10-05	2.17	6610
chr4:219538110-219539893	ENSRNOT00000013621.4	Wnk1	ENSRNOT00000013621	2.41	4.43	1.92	-0.48	9.42	9.78	2022-02-06	1.95	1784
Table S10 : Over-transported transcripts in NGF-treated axons as compared to NT-3 treated axons. Columns represent: 1- Coordinate of the 3’ UTR isoform in Rn5, 2- 3’ UTR isoform unique ID, 3- Rn5 rat gene symbol, 4- Ensembl Rn5 transcript ID, 5- predicted difference in axonal localisation score between NGF and NT-3, 6- predicted difference in relative abundance ratios (ax/cb) between NGF and NT-3…
