# Supplementary material for: The predicted RNA-binding protein regulome of axonal mRNAs
Source: HighWire-hosted journal article supplement (doi:10.1101/gr.277804.123), 2023-08-15
Supplement: Supplemental_Tables.zip [file Supplemental Table S11.xlsx]

## Sheet: Sheet1
coord	uniqueIDs	GS	txID	diff.transport	diff(AX/CB)	transport.ngf	transport.nt3	cb.ngf	cb.nt3	axons.ngf	axons.nt3	wL
chr10:14417866-14418166	ENSRNOT00000068336.0	Tsr3	ENSRNOT00000068336	-2.25	-5.24	-0.53	1.72	9.84	2022-05-10	2.58	2022-03-08	301
chr14:79097609-79098257	ENSRNOT00000008932.0	Grpel1	ENSRNOT00000008932	-1.51	-1.91	-0.32	1.19	10.42	10.72	4.74	6.95	649
chr14:80166246-80166747	ENSRNOT00000012304.0	Hmx1	ENSRNOT00000012304	-1.74	-2.98	-0.55	1.19	10.28	10.60	3.66	6.96	502
chr3:2550548-2550717	ENSRNOT00000017271.0	Dpp7	ENSRNOT00000017271	-1.68	-2.48	-0.36	1.32	10.14	10.40	4.52	7.26	170
chr4:164992384-164992889	ENSRNOT00000016002.0	Tmem150a	ENSRNOT00000016002	-2.06	-4.00	-0.85	1.21	2022-02-10	10.35	2.66	7.00	506
chr8:74003713-74003852	ENSRNOT00000032268.0	Tex9	ENSRNOT00000032268	-1.94	-3.25	-0.32	1.63	10.22	2022-11-10	4.76	7.90	140
chr8:74003712-74003948	ENSRNOT00000064388.1	Tex9	ENSRNOT00000064388	-1.94	-3.25	-0.32	1.63	10.22	2022-11-10	4.76	7.90	237
chr19:68373427-68375516	ENSRNOT00000026767.4	Egln1	ENSRNOT00000026767	-1.80	-4.48	-0.76	2022-03-01	9.75	2022-07-10	1.80	6.60	2090
chr13:114411695-114412879	ENSRNOT00000005085.0	Atf3	ENSRNOT00000005085	-3.64	-6.18	-0.78	2.85	10.59	10.74	2.30	8.63	1185
chr19:49941868-49942906	ENSRNOT00000070822.0	Chtf8	ENSRNOT00000070822	-1.42	-1.87	-0.32	2022-10-01	10.71	10.68	4.19	2022-04-06	1039
chr6:141941104-141942432	ENSRNOT00000050350.0	Wars	ENSRNOT00000050350	-1.62	-1.92	-0.36	1.26	10.44	10.95	3.91	6.35	1329
chr13:78595688-78596463	ENSRNOT00000005296.2	Tor1aip1	ENSRNOT00000005296	-1.97	-4.07	-0.88	2022-09-01	10.54	10.46	2022-01-02	2022-01-06	776
chr6:141941094-141941388	ENSRNOT00000006128.2	Wars	ENSRNOT00000006128	-1.62	-1.92	-0.36	1.26	10.44	10.95	3.91	6.35	295
chr7:126721801-126724021	ENSRNOT00000022746.3	Gramd4	ENSRNOT00000022746	-1.46	-1.85	-0.40	2022-06-01	10.28	10.65	3.74	5.96	2221
chr5:140496435-140497277	ENSRNOT00000026591.2	B4galt2	ENSRNOT00000026591	-2.69	-4.16	-0.38	2.30	10.60	10.56	3.80	7.92	843
chr4:27341519-27342323	ENSRNOT00000032505.4	Krit1	ENSRNOT00000032505	-2.55	-4.45	-1.32	1.23	11.13	10.78	2.21	6.30	805
chr8:32585602-32586755	ENSRNOT00000011223.0	Nfrkb	ENSRNOT00000011223	-1.77	-2.74	-0.62	1.16	10.18	10.20	2.80	5.57	1154
chr9:44410206-44411374	ENSRNOT00000067197.0	Rev1	ENSRNOT00000067197	-1.35	-0.64	-0.32	2022-04-01	2022-03-10	10.78	3.96	5.35	1169
chrX:104737742-104742710	ENSRNOT00000074330.0	Cstf2	ENSRNOT00000074330	-1.87	-3.19	-0.82	2022-04-01	10.84	10.83	2.19	5.37	4969
chr6:39789877-39790621	ENSRNOT00000074150.2	Itsn2	ENSRNOT00000074150	-2.46	-3.44	-0.74	1.71	10.48	10.98	2.42	6.35	745
chr4:7214370-7214807	ENSRNOT00000064386.1	Agap3	ENSRNOT00000064386	-1.48	-1.68	-0.39	2022-08-01	10.53	10.68	3.61	5.44	438
chr12:26476185-26477853	ENSRNOT00000001975.0	Baz1b	ENSRNOT00000001975	-2.56	-4.81	-0.82	1.74	10.40	10.78	2022-10-02	7.29	1669
chr10:59235224-59237537	ENSRNOT00000036278.3	Zzef1	ENSRNOT00000036278	-1.81	-3.86	-0.60	1.21	9.58	10.23	1.80	6.31	2314
chr6:113885131-113889825	ENSRNOT00000010022.5	Pcnx	ENSRNOT00000010022	-2.69	-5.61	-1.46	1.23	10.39	10.64	0.50	6.36	4695
chr17:25963072-25963431	ENSRNOT00000024066.0	Sirt5	ENSRNOT00000024066	-1.46	-1.63	-0.33	1.13	11.21	11.69	5.96	2022-07-08	360
chr20:47041320-47041585	ENSRNOT00000000717.0	Rpf2	ENSRNOT00000000717	-2.31	-4.99	-1.07	1.24	11.26	11.16	3.42	8.31	266
chr3:17081165-17081675	ENSRNOT00000032893.0	Cdk9	ENSRNOT00000032893	-1.88	-2.96	-0.40	1.48	2022-05-11	11.31	5.59	8.80	511
chr6:144273576-144273773	ENSRNOT00000015122.0	Ckb	ENSRNOT00000015122	-1.33	-1.25	-0.32	2022-01-01	11.41	11.94	6.00	7.78	198
chr8:116427899-116429130	ENSRNOT00000075241.0	Tcta	ENSRNOT00000075241	-1.73	-3.14	-0.71	2022-02-01	11.29	11.54	4.43	7.82	1232
chr20:11460839-11462070	ENSRNOT00000000650.4	Glo1	ENSRNOT00000000650	-1.54	-2.65	-0.48	2022-06-01	11.97	11.94	5.29	7.90	1232
chr11:36145270-36146740	ENSRNOT00000002715.0	Rcan1	ENSRNOT00000002715	-2.23	-3.79	-0.68	1.55	11.16	11.48	3.85	7.95	1471
chr17:13993624-13994716	ENSRNOT00000014546.1	Sptlc1	ENSRNOT00000014546	-1.86	-3.49	-0.69	1.16	11.41	11.35	3.82	7.25	1093
chr4:29602486-29603689	ENSRNOT00000073687.4	Casd1	ENSRNOT00000073687	-2.63	-4.02	-1.48	1.15	12.43	11.95	3.68	7.22	1204
chr5:151137774-151138727	ENSRNOT00000010674.3	Yars	ENSRNOT00000010674	-1.40	-1.43	-0.31	2022-09-01	11.54	11.92	5.29	2022-10-07	954
chr7:120941356-120942717	ENSRNOT00000046399.0	Sun2	ENSRNOT00000046399	-1.62	-2.18	-0.56	2022-06-01	11.31	11.26	4.37	6.49	1362
chr7:129366021-129367290	ENSRNOT00000006034.0	Brd1	ENSRNOT00000006034	-1.65	-2.41	-0.58	2022-07-01	11.56	11.35	4.31	6.50	1270
chr3:50530400-50531153	ENSRNOT00000059246.3	Pkp4	ENSRNOT00000059246	-2.64	-4.17	-1.16	1.48	11.36	11.43	2.90	7.14	754
chr7:63910966-63913405	ENSRNOT00000009645.6	Xpot	ENSRNOT00000009645	-2.15	-2.50	-0.87	1.28	12.17	11.94	4.59	6.86	2440
chr4:180486782-180487010	ENSRNOT00000064536.0	Dysf	ENSRNOT00000064536	-1.66	-3.30	-0.56	2022-10-01	11.87	11.97	3.74	7.15	229
chr8:21569186-21573103	ENSRNOT00000042903.0	Zfp266	ENSRNOT00000042903	-2.55	-4.76	-0.68	1.86	2022-05-12	11.77	4.16	8.65	3918
chr13:85373601-85375680	ENSRNOT00000004243.3	Vamp4	ENSRNOT00000004243	-1.88	-1.95	-0.66	1.22	2022-06-13	12.80	6.66	8.36	2080
chr10:72063373-72064020	ENSRNOT00000042506.3	Ggnbp2	ENSRNOT00000042506	-1.74	-1.28	-0.50	1.23	2022-01-13	13.00	2022-09-07	8.37	648
chr15:23771818-23772892	ENSRNOT00000012400.0	Fermt2	ENSRNOT00000012400	-1.82	-1.47	-0.78	2022-04-01	2022-07-13	12.88	6.49	7.77	1075
chr8:81931190-81932438	ENSRNOT00000013053.0	Mapk6	ENSRNOT00000013053	-2.27	-1.70	-0.34	1.92	13.23	12.97	7.79	9.23	1249
chr9:66592773-66596356	ENSRNOT00000031261.0	Fam117b	ENSRNOT00000031261	-2.59	-2.56	-0.69	1.89	2022-05-13	13.00	6.68	9.19	3584
chr19:10604192-10604738	ENSRNOT00000021769.3	Ciapin1	ENSRNOT00000021769	-1.63	-1.69	-0.30	1.33	12.47	12.76	6.34	8.32	547
chr17:79283007-79287408	ENSRNOT00000024872.6	Prpf18	ENSRNOT00000024872	-1.61	-1.76	-0.33	1.28	12.37	12.62	6.22	8.23	4402
chr5:124186152-124189772	ENSRNOT00000070967.4	Ak4	ENSRNOT00000070967	-1.82	-3.49	-0.81	1.00	12.69	12.16	4.74	7.69	3621
chr8:105969367-105969562	ENSRNOT00000018755.0	Rbp2	ENSRNOT00000018755	-3.24	-2.95	-0.52	2.72	4.44	3.87	0.00	2.38	196
chr1:206693508-206700083	ENSRNOT00000026979.6	LOC100360446	ENSRNOT00000026979	-1.98	-1.37	-0.48	1.50	3.82	3.86	0.00	1.41	6576
chr14:16889875-16890749	ENSRNOT00000003020.0	Stbd1	ENSRNOT00000003020	-4.52	-5.22	-0.52	4.00	5.49	3.86	0.00	3.60	875
chr4:156605281-156605322	ENSRNOT00000043827.0	Ccser1	ENSRNOT00000043827	-4.47	-2.54	-0.47	4.00	3.59	3.65	0.00	2.59	42
chr20:12930639-12931161	ENSRNOT00000001580.3	Hsf2bp	ENSRNOT00000001580	-4.46	-4.05	-0.46	4.00	2022-02-04	3.71	0.00	3.74	523
chr3:167528266-167542099	ENSRNOT00000023521.5	Zfp335	ENSRNOT00000023521	-1.91	-0.58	-0.45	1.46	3.54	3.96	0.00	2022-01-01	13834
chr20:57779377-57779461	ENSRNOT00000073028.0	Cd99	ENSRNOT00000073028	-1.86	-1.75	-0.31	1.55	4.75	4.16	0.50	1.67	85
chr18:40106156-40106383	ENSRNOT00000004747.2	Mospd4	ENSRNOT00000004747	-4.31	-2.64	-0.31	4.00	4.65	4.49	0.50	2.98	228
chr1:90176985-90177034	ENSRNOT00000028442.0	Igflr1	ENSRNOT00000028442	-4.19	-2.34	-0.49	3.70	4.51	4.92	0.00	2.74	50
chr1:181123905-181124486	ENSRNOT00000019247.0	Rpl27a	ENSRNOT00000019247	-4.49	-2.45	-0.49	4.00	4.19	4.86	0.00	2022-12-03	582
chr1:268770872-268771456	ENSRNOT00000049914.0	Hoga1	ENSRNOT00000049914	-1.65	-1.68	-0.49	1.16	4.92	4.54	0.00	1.30	585
chr1:90705285-90705988	ENSRNOT00000028653.0	Scn1b	ENSRNOT00000028653	-2.77	-1.77	-0.49	2.28	4.55	4.75	0.00	1.96	704
chr1:220817754-220817918	ENSRNOT00000054874.0	Sigirr	ENSRNOT00000054874	-2.06	-1.29	-0.48	1.58	3.95	4.25	0.00	1.59	165
chr10:108244533-108251018	ENSRNOT00000004966.0	Endov	ENSRNOT00000004966	-2.98	-2.25	-0.49	2.49	4.30	2022-10-04	0.00	2022-05-02	6486
chr20:7288115-7288401	ENSRNOT00000073474.0	RT1-DMb	ENSRNOT00000073474	-1.65	-0.82	-0.49	1.16	2022-10-04	4.57	0.00	1.30	287
chr9:118636412-118636891	ENSRNOT00000021534.0	Tgif1	ENSRNOT00000021534	-1.92	-0.99	-0.49	1.43	4.43	4.93	0.00	1.50	480
chr4:62123124-62123841	ENSRNOT00000029845.2	Tmem140	ENSRNOT00000029845	-3.06	-1.82	-0.49	2.57	4.51	4.79	0.00	2022-10-02	718
chr18:60949520-60953851	ENSRNOT00000034069.2	Ccbe1	ENSRNOT00000034069	-4.48	-2.81	-0.48	4.00	3.85	4.14	0.00	2022-10-03	4332
chr18:68103919-68106872	ENSRNOT00000014670.6	LOC361346	ENSRNOT00000014670	-4.53	-3.02	-0.53	4.00	2022-10-05	4.85	0.00	2.78	2954
chr1:221114407-221114723	ENSRNOT00000022867.0	Lrrc56	ENSRNOT00000022867	-2.64	-1.67	-0.46	2.18	4.00	4.74	0.00	2.41	317
chr2:11680470-11681150	ENSRNOT00000076992.0	Mef2c	ENSRNOT00000076992	-2.65	-2.21	-0.46	2.19	2022-12-04	4.31	0.00	2.41	681
chr20:14965125-14965350	ENSRNOT00000001699.0	Ftcd	ENSRNOT00000001699	-4.46	-3.98	-0.46	4.00	2022-04-04	4.33	0.00	4.27	226
chr4:10416405-10429270	ENSRNOT00000039953.0	Gsap	ENSRNOT00000039953	-2.57	-1.20	-0.47	2022-10-02	3.59	4.72	0.00	2.33	12866
chr5:130087481-130088219	ENSRNOT00000009582.0	Ttc22	ENSRNOT00000009582	-4.46	-3.42	-0.46	4.00	4.46	4.89	0.00	3.85	739
chr4:208662539-208663119	ENSRNOT00000012015.3	Ttll3	ENSRNOT00000012015	-2.20	-1.44	-0.46	1.74	4.21	4.87	0.00	2022-10-02	581
chr4:62020727-62032376	ENSRNOT00000041264.9	Cald1	ENSRNOT00000041264	-2.85	-2.68	-0.46	2.39	4.22	2022-09-04	0.00	2.55	11650
chr10:86480014-86480150	ENSRNOT00000055333.1	Nr1d1	ENSRNOT00000055333	-1.88	-1.89	-0.34	1.55	4.77	4.56	0.24	1.93	137
chr8:126791842-126795565	ENSRNOT00000015113.6	Itga9	ENSRNOT00000015113	-2.63	-2.45	-0.52	2022-10-02	2022-08-05	4.95	0.00	2.33	3724
chr17:29405045-29405404	ENSRNOT00000038349.2	Cage1	ENSRNOT00000038349	-2.54	-2.95	-0.46	2022-08-02	4.87	4.23	0.00	2.30	360
chr11:82540930-82549654	ENSRNOT00000002639.5	Leprel1	ENSRNOT00000002639	-1.77	-1.68	-0.46	1.31	4.60	4.66	0.00	1.74	8725
chr9:46866263-46868878	ENSRNOT00000020144.4	Il1rl1	ENSRNOT00000020144	-3.24	-3.12	-0.52	2.72	2022-05-05	4.74	0.00	2.81	2616
chr1:16626004-16627416	ENSRNOT00000016286.3	Ifngr1	ENSRNOT00000016286	-2.38	-2.04	-0.46	1.92	4.70	4.86	0.00	2.20	1413
chr18:47091516-47092054	ENSRNOT00000025119.0	Sncaip	ENSRNOT00000025119	-1.84	-1.43	-0.46	1.38	2022-09-04	4.33	0.00	1.67	539
chr5:85247437-85247859	ENSRNOT00000076467.0	Pappa	ENSRNOT00000076467	-1.79	-0.93	-0.46	1.33	4.15	4.84	0.00	1.62	423
chr17:30580245-30581788	ENSRNOT00000021568.3	F13a1	ENSRNOT00000021568	-2.79	-1.98	-0.46	2.33	4.20	4.57	0.00	2.36	1544
chr10:86138370-86138436	ENSRNOT00000073486.0	Pnmt	ENSRNOT00000073486	-2.21	-3.55	-0.41	1.80	6.33	5.33	0.80	3.35	67
chr19:65959818-65959903	ENSRNOT00000017564.0	Cyba	ENSRNOT00000017564	-1.46	-1.69	-0.39	2022-07-01	2022-03-05	5.22	0.50	2.38	86
chr2:104193712-104193823	ENSRNOT00000065312.0	Ropn1l	ENSRNOT00000065312	-2.67	-3.74	-0.56	2022-11-02	5.35	5.34	0.00	3.72	112
chr7:120158288-120158542	ENSRNOT00000013764.0	Nol12	ENSRNOT00000013764	-1.33	-1.43	-0.31	2022-02-01	5.41	5.49	0.80	2.30	255
chr9:84177555-84177700	ENSRNOT00000019724.0	Mogat1	ENSRNOT00000019724	-2.27	-2.62	-0.39	1.88	2022-01-05	5.34	0.50	3.45	146
chr16:61767829-61774273	ENSRNOT00000046138.4	Rbpms	ENSRNOT00000046138	-2.96	-3.67	-0.56	2.40	5.53	5.86	0.00	3.99	6445
chr1:75991121-75991430	ENSRNOT00000022620.0	Isoc2b	ENSRNOT00000022620	-3.74	-2.70	-0.34	3.40	5.64	5.84	0.50	3.41	310
chr12:9358343-9358427	ENSRNOT00000001219.0	LOC100910196	ENSRNOT00000001219	-2.47	-2.95	-0.53	1.94	5.55	2022-10-05	0.00	2.50	85
chr12:43089838-43090344	ENSRNOT00000001848.0	Oas1f	ENSRNOT00000001848	-1.97	-1.37	-0.53	1.44	5.14	5.86	0.00	2022-10-02	507
chr2:208154853-208156181	ENSRNOT00000055533.0	Cks1b	ENSRNOT00000055533	-4.03	-4.11	-0.63	3.40	2022-10-06	5.37	0.00	3.39	1329
chr2:217601897-217601982	ENSRNOT00000028747.0	Plekho1	ENSRNOT00000028747	-2.22	-2.04	-0.46	1.76	2022-10-06	5.92	0.50	2.36	86
chr3:121313418-121314263	ENSRNOT00000073569.0	MGC105649	ENSRNOT00000073569	-1.77	-2.59	-0.63	1.13	6.53	5.75	0.00	1.80	846
chr5:139364085-139364237	ENSRNOT00000056967.0	Ccdc163	ENSRNOT00000056967	-3.50	-2.15	-0.34	3.15	5.16	5.71	0.50	3.21	153
chr7:11813536-11814096	ENSRNOT00000026871.0	Gadd45b	ENSRNOT00000026871	-1.66	-2.15	-0.63	2022-02-01	6.42	5.94	0.00	1.67	561
chr8:2673333-2673885	ENSRNOT00000061973.0	Casp4	ENSRNOT00000061973	-4.49	-3.39	-0.49	4.00	4.73	5.34	0.00	4.00	553
chr3:100571285-100572034	ENSRNOT00000012625.2	Lmo2	ENSRNOT00000012625	-4.63	-3.87	-0.63	4.00	6.27	5.96	0.00	3.56	750
chr4:57595150-57596024	ENSRNOT00000030462.3	Ssmem1	ENSRNOT00000030462	-1.60	-1.70	-0.53	2022-07-01	2022-09-05	2022-11-05	0.00	1.72	875
chr1:172647332-172648412	ENSRNOT00000026428.2	Stard10	ENSRNOT00000026428	-3.08	-3.06	-0.46	2.62	6.19	5.62	0.50	2.99	1081
chr17:7633703-7635855	ENSRNOT00000037597.4	Golm1	ENSRNOT00000037597	-2.58	-2.40	-0.53	2022-06-02	5.68	5.87	0.00	2.59	2153
chr4:179645457-179648519	ENSRNOT00000031583.3	Bola3	ENSRNOT00000031583	-4.32	-3.85	-0.32	4.00	6.22	5.58	2022-01-01	4.22	3063
chr8:110790093-110796303	ENSRNOT00000067203.7	Ryk	ENSRNOT00000067203	-1.76	-2.15	-0.53	1.24	5.40	5.15	0.00	1.91	6211
chr2:226696753-226699195	ENSRNOT00000017254.4	Rhoc	ENSRNOT00000017254	-2.02	-2.36	-0.53	1.49	5.63	5.41	0.00	2.13	2443
chr1:192070803-192078685	ENSRNOT00000027752.4	Nucb2	ENSRNOT00000027752	-3.45	-3.37	-0.53	2.92	5.45	5.18	0.00	2022-10-03	7883
chr9:53240507-53249563	ENSRNOT00000016842.7	Inpp1	ENSRNOT00000016842	-2.52	-2.27	-0.53	2.00	5.40	5.68	0.00	2.55	9057
chr1:102871487-102871754	ENSRNOT00000067679.0	LOC691056	ENSRNOT00000067679	-1.51	-0.87	-0.46	2022-04-01	4.33	5.22	0.00	1.75	268
chr1:63399153-63399956	ENSRNOT00000019825.0	Prkcg	ENSRNOT00000019825	-2.64	-2.07	-0.47	2.17	5.21	5.88	0.13	2.88	804
chr1:231912413-231912447	ENSRNOT00000026284.0	Taf6l	ENSRNOT00000026284	-2.07	-1.78	-0.52	1.55	5.20	5.72	0.00	2.29	35
chr10:83007148-83008064	ENSRNOT00000005939.0	Fam117a	ENSRNOT00000005939	-2.97	-2.81	-0.52	2.44	5.27	5.57	0.00	2022-11-03	917
chr10:103630404-103630654	ENSRNOT00000010887.0	Trim47	ENSRNOT00000010887	-2.88	-2.55	-0.52	2.36	5.33	5.82	0.00	2022-03-03	251
chr10:104573316-104573975	ENSRNOT00000004351.0	Slc9a3r1	ENSRNOT00000004351	-2.72	-2.32	-0.32	2.40	5.57	5.81	0.50	2022-06-03	660
chr12:39892745-39894365	ENSRNOT00000001445.0	Vps37b	ENSRNOT00000001445	-2.64	-3.07	-0.52	2022-11-02	5.40	5.13	0.00	2.80	1621
chr14:113673517-113673626	ENSRNOT00000006085.0	Clhc1	ENSRNOT00000006085	-2.21	-1.92	-0.52	1.68	2022-11-05	5.62	0.00	2.43	110
chr5:155113818-155114117	ENSRNOT00000064472.0	Sytl1	ENSRNOT00000064472	-1.66	-1.91	-0.52	1.14	5.50	5.45	0.00	1.85	300
chr1:90656281-90658064	ENSRNOT00000028632.5	Lgi4	ENSRNOT00000028632	-4.32	-6.73	-0.32	4.00	5.47	5.36	0.50	7.13	1784
chr4:191048490-191143499	ENSRNOT00000065705.6	Slc25a26	ENSRNOT00000065705	-3.38	-2.50	-0.46	2.92	2022-05-04	2022-10-05	0.00	3.54	95010
chr1:48236800-48241868	ENSRNOT00000060527.6	Serac1	ENSRNOT00000060527	-4.63	-4.41	-0.63	4.00	6.31	6.00	0.00	2022-09-04	5069
chr14:106265796-106275287	ENSRNOT00000067668.5	Ugp2	ENSRNOT00000067668	-1.41	-0.78	-0.32	2022-09-01	2022-12-05	5.63	0.50	1.80	9492
chr5:38248521-38263812	ENSRNOT00000009047.11	Wwp1	ENSRNOT00000009047	-2.45	-2.35	-0.52	1.92	5.41	5.69	0.00	2.63	15292
chr5:144348360-144351220	ENSRNOT00000018711.7	Cap1	ENSRNOT00000018711	-1.55	-1.21	-0.52	2022-03-01	2022-11-05	5.63	0.00	1.74	2861
chr1:81219191-81219274	ENSRNOT00000019814.0	Sympk	ENSRNOT00000019814	-2.58	-2.07	-0.46	2022-12-02	4.78	5.18	0.00	2.46	84
chr10:67520650-67522750	ENSRNOT00000004609.0	Myo1d	ENSRNOT00000004609	-1.76	-1.25	-0.52	1.25	5.45	5.99	0.00	1.79	2101
chr11:86602390-86602839	ENSRNOT00000044896.0	Ephb3	ENSRNOT00000044896	-3.85	-3.28	-0.32	3.52	2022-02-06	5.20	0.80	3.26	450
chr12:20153704-20156299	ENSRNOT00000001784.0	Zfp68	ENSRNOT00000001784	-4.58	-4.24	-0.58	4.00	2022-02-06	5.93	0.00	4.15	2596
chr4:161116068-161117914	ENSRNOT00000008947.0	RGD1560028	ENSRNOT00000008947	-4.28	-4.22	-0.58	3.70	6.65	5.92	0.00	3.49	1847
chr1:198926524-198926652	ENSRNOT00000025400.1	Cog7	ENSRNOT00000025400	-2.47	-1.67	-0.46	2022-01-02	4.88	5.60	0.00	2.38	129
chr15:38428228-38429972	ENSRNOT00000074659.4	Nynrin	ENSRNOT00000074659	-3.91	-2.79	-0.52	3.40	5.64	5.98	0.00	3.13	1745
chr9:94989403-94989573	ENSRNOT00000025291.2	Ugt1a3	ENSRNOT00000025291	-2.32	-1.87	-0.52	1.80	5.35	5.71	0.00	2.24	171
chr3:131073785-131077530	ENSRNOT00000028883.2	Rassf2	ENSRNOT00000028883	-3.91	-3.26	-0.52	3.40	5.26	5.14	0.00	3.13	3746
chr19:10190300-10192163	ENSRNOT00000060351.3	Cngb1	ENSRNOT00000060351	-2.17	-1.57	-0.46	1.71	4.64	5.24	0.00	2.17	1864
chr12:25445428-25446113	ENSRNOT00000059486.0	Cux1	ENSRNOT00000059486	-2.00	-1.86	-0.39	1.61	2022-03-05	5.65	0.50	2.99	686
chr14:7662574-7663146	ENSRNOT00000061162.0	Ptpn13	ENSRNOT00000061162	-1.82	-2.20	-0.47	1.35	4.82	5.33	0.00	2.71	573
chr10:70067677-70076884	ENSRNOT00000076112.3	Slfn3	ENSRNOT00000076112	-3.40	-3.99	-0.44	2.96	2022-03-06	5.88	0.50	4.34	9208
chr12:18384509-18384705	ENSRNOT00000001700.0	Nudt1	ENSRNOT00000001700	-1.57	-2.37	-0.56	2022-02-01	5.80	6.46	0.00	2022-03-03	197
chr2:206729530-206729806	ENSRNOT00000025183.0	LOC100911902	ENSRNOT00000025183	-1.63	-2.72	-0.49	1.13	6.71	6.70	0.50	3.22	277
chr10:72128181-72135080	ENSRNOT00000039481.4	Znhit3	ENSRNOT00000039481	-1.84	-3.08	-0.65	1.19	6.71	6.94	0.00	3.31	6900
chr2:276686391-276690146	ENSRNOT00000072899.7	St6galnac5	ENSRNOT00000072899	-1.79	-2.74	-0.49	1.30	6.54	6.78	0.50	3.48	3756
chr3:177356658-177360061	ENSRNOT00000071853.6	Pmepa1	ENSRNOT00000071853	-2.46	-3.32	-0.56	1.90	5.45	6.53	0.00	4.39	3404
chr10:45317048-45317467	ENSRNOT00000004011.0	RGD1304587	ENSRNOT00000004011	-1.74	-2.18	-0.46	1.28	2022-06-06	6.21	0.50	2.83	420
chr10:104121545-104122031	ENSRNOT00000005198.0	Mif4gd	ENSRNOT00000005198	-2.91	-3.56	-0.63	2.28	6.23	6.55	0.00	3.88	487
chr14:45855972-45856748	ENSRNOT00000002982.0	LOC498368	ENSRNOT00000002982	-1.78	-1.80	-0.46	1.32	2022-04-06	6.62	0.50	2.88	777
chr20:5891721-5892016	ENSRNOT00000000543.0	Ring1	ENSRNOT00000000543	-2.09	-2.72	-0.53	1.56	5.69	6.18	0.00	3.21	296
chr4:204571140-204571717	ENSRNOT00000008892.0	Setmar	ENSRNOT00000008892	-2.62	-2.51	-0.38	2.24	6.19	6.75	0.80	3.86	578
chr5:151029686-151029951	ENSRNOT00000033285.0	Tmem54	ENSRNOT00000033285	-1.58	-1.93	-0.42	1.16	2022-09-07	6.54	1.29	2.66	266
chr5:138803952-138804328	ENSRNOT00000018766.0	Tspan1	ENSRNOT00000018766	-2.36	-2.92	-0.46	1.90	6.55	6.69	0.50	3.56	377
chr6:35952972-35953018	ENSRNOT00000006452.0	Rbks	ENSRNOT00000006452	-1.53	-2.00	-0.46	2022-07-01	6.17	6.20	0.50	2.53	47
chr8:116117472-116117520	ENSRNOT00000026216.0	Fam212a	ENSRNOT00000026216	-1.85	-2.60	-0.53	1.32	5.99	6.27	0.00	2.88	49
chr9:40659304-40660089	ENSRNOT00000067928.3	Ptpn18	ENSRNOT00000067928	-3.06	-3.73	-0.46	2.60	6.26	6.20	0.50	4.18	786
chr5:83487477-83490845	ENSRNOT00000011508.7	Atp6v1g1	ENSRNOT00000011508	-2.79	-3.65	-0.46	2.33	6.33	2022-09-06	0.50	3.92	3369
chr3:117088852-117092048	ENSRNOT00000045362.7	RGD1565536	ENSRNOT00000045362	-1.80	-1.85	-0.38	1.41	2022-03-08	6.98	2.20	3.00	3197
chr16:83949829-83964525	ENSRNOT00000043188.6	LOC689713	ENSRNOT00000043188	-2.74	-3.19	-0.63	2022-10-02	2022-06-06	6.62	0.00	3.75	14697
chr2:207362329-207363651	ENSRNOT00000027123.4	Ssr2	ENSRNOT00000027123	-1.75	-2.72	-0.63	2022-12-01	6.48	6.36	0.00	2.60	1323
chr8:63067371-63072555	ENSRNOT00000033397.3	RGD1562618	ENSRNOT00000033397	-2.16	-1.97	-0.32	1.84	6.36	6.85	2022-01-01	3.47	5185
chr1:30642427-30643762	ENSRNOT00000018718.0	Hey2	ENSRNOT00000018718	-2.31	-3.75	-0.99	1.32	2022-11-08	6.94	0.00	2.58	1336
chr1:231987290-231988583	ENSRNOT00000036454.0	Lrrn4cl	ENSRNOT00000036454	-1.61	-2.07	-0.43	1.18	6.68	6.51	0.50	2.40	1294
chr10:13820310-13821330	ENSRNOT00000004172.0	Slc9a3r2	ENSRNOT00000004172	-3.18	-4.16	-0.63	2.55	6.61	6.34	0.00	3.89	1021
chr5:54685892-54685987	ENSRNOT00000011688.0	Rars2	ENSRNOT00000011688	-1.38	-1.24	-0.33	2022-05-01	6.55	6.75	0.80	2.24	96
chr6:6393380-6394146	ENSRNOT00000005664.0	Pkdcc	ENSRNOT00000005664	-1.95	-3.13	-0.43	1.52	6.95	6.14	0.50	2.83	767
chr7:126463974-126464313	ENSRNOT00000022012.0	Gtse1	ENSRNOT00000022012	-2.03	-2.21	-0.52	1.51	5.57	6.18	0.00	2.81	340
chr8:32266159-32266620	ENSRNOT00000009139.0	St14	ENSRNOT00000009139	-2.42	-3.30	-0.63	1.80	6.62	6.40	0.00	2022-08-03	462
chr8:115368435-115369600	ENSRNOT00000020065.0	Mapkapk3	ENSRNOT00000020065	-3.06	-3.61	-0.52	2.54	5.87	2022-11-06	0.00	3.85	1166
chr4:153712009-153712481	ENSRNOT00000009546.3	Abcg2	ENSRNOT00000009546	-3.67	-4.24	-0.63	2022-05-03	6.59	6.65	0.00	4.31	473
chr11:75092613-75096484	ENSRNOT00000049862.6	Pak2	ENSRNOT00000049862	-3.42	-4.15	-0.63	2.80	6.94	6.94	0.00	4.15	3872
chr10:45260565-45263397	ENSRNOT00000036940.5	Iba57	ENSRNOT00000036940	-3.14	-3.09	-0.52	2.62	5.32	6.16	0.00	3.94	2833
chr10:9754858-9764750	ENSRNOT00000004999.9	Cdip1	ENSRNOT00000004999	-3.25	-3.95	-0.63	2.62	2022-11-06	2022-11-06	0.00	3.95	9893
chr2:205508254-205509436	ENSRNOT00000023418.5	Lrba	ENSRNOT00000023418	-2.32	-2.68	-0.43	1.89	2022-10-06	2022-12-06	0.50	3.21	1183
chr4:165244486-165245610	ENSRNOT00000019571.2	Retsat	ENSRNOT00000019571	-2.05	-2.89	-0.63	1.42	6.36	6.17	0.00	2.70	1125
chr11:81519581-81532916	ENSRNOT00000044279.7	Lpp	ENSRNOT00000044279	-3.54	-2.74	-0.32	3.22	2022-07-05	6.23	0.50	4.39	13336
chr8:115415006-115416045	ENSRNOT00000040056.2	Cish	ENSRNOT00000040056	-2.03	-2.59	-0.63	1.40	2022-10-06	6.18	0.00	2.67	1040
chrX:33992246-33996042	ENSRNOT00000066676.3	Rbbp7	ENSRNOT00000066676	-2.63	-3.00	-0.63	2.00	6.60	6.94	0.00	3.34	3797
chr14:71745550-71747579	ENSRNOT00000004121.2	Cd38	ENSRNOT00000004121	-3.08	-3.31	-0.52	2.55	5.55	2022-12-06	0.00	3.88	2030
chr18:46713596-46716791	ENSRNOT00000074226.6	Lox	ENSRNOT00000074226	-2.08	-2.55	-0.52	1.56	6.00	6.30	0.00	2.85	3196
chr8:114212007-114213765	ENSRNOT00000074595.4	Glyctk	ENSRNOT00000074595	-2.54	-2.87	-0.63	1.91	6.35	6.70	0.00	3.22	1759
chr13:53029914-53043094	ENSRNOT00000006768.4	Eif2d	ENSRNOT00000006768	-2.44	-3.05	-0.43	2022-01-02	6.53	6.32	0.50	3.35	13181
chr4:144597822-144607763	ENSRNOT00000029332.6	Mpp6	ENSRNOT00000029332	-3.13	-3.04	-0.43	2.70	2022-03-06	6.51	0.50	2022-03-04	9942
chr6:101523866-101527574	ENSRNOT00000006374.4	Cdkl1	ENSRNOT00000006374	-1.91	-1.38	-0.46	1.45	4.68	2022-03-06	0.00	2.73	3709
chr6:102044782-102045287	ENSRNOT00000009183.2	Pygl	ENSRNOT00000009183	-1.66	-3.03	-0.63	2022-03-01	6.90	2022-07-06	0.00	2.20	506
chr1:90330434-90330740	ENSRNOT00000028508.0	Atp4a	ENSRNOT00000028508	-1.69	-1.98	-0.52	1.18	5.71	6.21	0.00	2.48	307
chr17:78978379-78982080	ENSRNOT00000024697.0	Sephs1	ENSRNOT00000024697	-2.12	-2.88	-0.58	1.53	6.76	6.80	0.00	2.92	3702
chr3:146508660-146510342	ENSRNOT00000064695.0	Rin2	ENSRNOT00000064695	-2.11	-2.77	-0.41	1.70	6.19	2022-01-06	0.50	2022-09-03	1683
chr11:40207825-40211825	ENSRNOT00000050178.3	B3galt5	ENSRNOT00000050178	-1.53	-1.83	-0.41	2022-12-01	6.44	6.53	0.50	2.41	4001
chr5:96907361-96910963	ENSRNOT00000025426.5	Ptprd	ENSRNOT00000025426	-2.92	-3.46	-0.41	2.51	6.72	6.64	0.50	3.88	3603
chr4:187650682-187651237	ENSRNOT00000037256.2	Fbln2	ENSRNOT00000037256	-1.43	-0.99	-0.33	2022-11-01	5.41	6.31	0.50	2.39	556
chr5:52409922-52415687	ENSRNOT00000065882.5	Bach2	ENSRNOT00000065882	-2.10	-2.15	-0.52	1.58	5.93	6.75	0.00	2.97	5766
chr3:118772808-118774626	ENSRNOT00000011369.5	Ganc	ENSRNOT00000011369	-1.69	-1.48	-0.41	1.29	2022-09-06	6.74	0.50	2.63	1819
chr5:83284996-83286677	ENSRNOT00000010333.3	Col27a1	ENSRNOT00000010333	-1.84	-2.39	-0.41	1.43	6.43	6.35	0.50	2.80	1682
chr1:236178077-236188456	ENSRNOT00000016152.3	Fam111a	ENSRNOT00000016152	-3.47	-4.24	-0.58	2.89	6.16	6.13	0.00	4.21	10380
chr15:29978616-29982488	ENSRNOT00000020074.8	Naa30	ENSRNOT00000020074	-1.64	-2.24	-0.41	1.23	6.38	6.19	0.50	2.55	3873
chr2:44892452-44893470	ENSRNOT00000065143.0	Arhgef28	ENSRNOT00000065143	-3.84	-3.19	-0.44	3.40	2022-09-06	6.25	0.50	3.86	1019
chr3:14261016-14261380	ENSRNOT00000030996.0	LOC100911302	ENSRNOT00000030996	-1.82	-1.93	-0.60	1.22	6.40	6.71	0.00	2.24	365
chr7:71213129-71216714	ENSRNOT00000005685.0	Zbtb39	ENSRNOT00000005685	-1.66	-1.42	-0.44	1.22	6.65	6.96	0.50	2.24	3586
chr3:110443876-110461271	ENSRNOT00000007144.4	Slc12a6	ENSRNOT00000007144	-1.69	-0.67	-0.47	1.22	4.85	6.42	0.00	2.24	17396
chr3:10815440-10816127	ENSRNOT00000066193.2	Med22	ENSRNOT00000066193	-1.77	-3.49	-0.49	1.28	6.87	7.37	0.50	4.48	688
chr1:205198901-205199196	ENSRNOT00000026909.0	Ppp4c	ENSRNOT00000026909	-3.24	-4.21	-0.38	2.85	7.64	7.97	1.41	5.96	296
chr10:88135609-88136044	ENSRNOT00000076625.0	Nt5c3b	ENSRNOT00000076625	-2.36	-3.95	-0.56	1.80	7.67	7.63	0.80	4.70	436
chr10:88135815-88136044	ENSRNOT00000022430.0	Nt5c3b	ENSRNOT00000022430	-2.37	-3.92	-0.56	1.82	7.85	7.87	0.80	4.74	230
chr15:59138530-59139026	ENSRNOT00000023195.0	Med4	ENSRNOT00000023195	-2.28	-3.72	-0.65	1.64	7.63	7.88	0.50	4.48	497
chr15:37067372-37067637	ENSRNOT00000016401.0	Haus4	ENSRNOT00000016401	-2.56	-3.89	-0.65	1.92	7.14	7.63	0.50	4.89	266
chr19:52927031-52928214	ENSRNOT00000034676.0	Txnl4b	ENSRNOT00000034676	-1.47	-1.65	-0.36	2022-11-01	7.39	7.89	1.51	3.66	1184
chr2:209361364-209361933	ENSRNOT00000016499.0	S100a16	ENSRNOT00000016499	-2.60	-4.25	-0.65	1.95	7.57	7.75	0.50	4.94	570
chr20:47904392-47904410	ENSRNOT00000000336.0	Smpd2	ENSRNOT00000000336	-2.57	-4.18	-0.83	1.74	7.13	7.56	0.00	4.61	19
chr3:78726740-78727220	ENSRNOT00000044319.0	Ube2l6	ENSRNOT00000044319	-2.38	-3.92	-0.75	1.63	8.19	7.94	0.80	4.47	481
chr1:206395579-206395715	ENSRNOT00000026527.1	Kat8	ENSRNOT00000026527	-2.11	-3.77	-0.65	1.46	7.72	7.70	0.50	4.26	137
chr5:65096897-65097296	ENSRNOT00000029704.2	Polr1e	ENSRNOT00000029704	-3.44	-4.95	-0.56	2.89	7.43	7.67	0.80	5.99	400
chr3:2160258-2160341	ENSRNOT00000046898.1	RGD1304868	ENSRNOT00000046898	-1.69	-2.75	-0.49	1.19	7.33	7.36	2022-01-01	3.79	84
chr8:131262779-131264653	ENSRNOT00000040475.3	Tmem42	ENSRNOT00000040475	-1.71	-2.81	-0.46	1.25	6.65	7.22	0.50	3.88	1875
chr14:77382892-77385695	ENSRNOT00000008030.8	Nsg1	ENSRNOT00000008030	-1.82	-3.01	-0.67	1.15	7.65	7.92	0.43	3.71	2804
chr20:16738880-16740698	ENSRNOT00000001772.5	Rab36	ENSRNOT00000001772	-1.86	-2.74	-0.65	1.21	7.22	7.80	0.50	3.82	1819
chr18:39827780-39829630	ENSRNOT00000004723.5	Pggt1b	ENSRNOT00000004723	-1.71	-2.89	-0.65	2022-06-01	2022-02-07	7.18	0.50	3.57	1851
chr1:74811265-74813522	ENSRNOT00000068459.0	Ttyh1	ENSRNOT00000068459	-4.01	-4.18	-0.49	3.52	7.19	7.64	0.80	5.42	2258
chr10:46517464-46517577	ENSRNOT00000032685.0	Lrrc48	ENSRNOT00000032685	-2.16	-2.71	-0.58	1.59	7.19	7.63	0.50	3.65	114
chr10:88130688-88131255	ENSRNOT00000076475.0	Fkbp10	ENSRNOT00000076475	-3.16	-3.44	-0.33	2.82	6.80	7.42	0.80	4.86	568
chr10:88130688-88131446	ENSRNOT00000022029.0	Fkbp10	ENSRNOT00000022029	-3.13	-3.40	-0.33	2.80	6.74	7.35	0.80	4.81	759
chr11:91966047-91966482	ENSRNOT00000002498.0	PKP2	ENSRNOT00000002498	-3.27	-3.43	-0.35	2.92	7.27	7.52	1.30	4.98	436
chr5:165646114-165647227	ENSRNOT00000020316.0	Pdpn	ENSRNOT00000020316	-1.99	-2.41	-0.63	1.37	6.48	7.44	0.00	3.36	1114
chr9:97057614-97058372	ENSRNOT00000026558.0	Cxcr7	ENSRNOT00000026558	-2.91	-3.58	-0.77	2.14	7.27	7.97	0.00	4.28	759
chr4:67049387-67050514	ENSRNOT00000034549.4	Dennd2a	ENSRNOT00000034549	-2.23	-3.16	-0.63	1.60	6.73	7.26	0.00	3.68	1128
chr8:118828208-118828407	ENSRNOT00000064581.1	Mlh1	ENSRNOT00000064581	-2.02	-2.46	-0.43	1.60	7.26	7.46	2022-01-01	3.66	200
chr18:51017465-51018233	ENSRNOT00000019351.4	Lmnb1	ENSRNOT00000019351	-2.11	-2.79	-0.58	1.54	2022-05-07	7.35	0.50	3.59	769
chr10:104461316-104463088	ENSRNOT00000029001.3	Fads6	ENSRNOT00000029001	-1.75	-2.44	-0.58	1.17	7.77	7.93	0.50	2022-10-03	1773
chr11:38547896-38551190	ENSRNOT00000050342.8	Dyrk1a	ENSRNOT00000050342	-1.57	-2.48	-0.44	1.13	7.68	7.28	0.97	2022-06-03	3295
chr4:7854324-7860284	ENSRNOT00000050789.7	Rint1	ENSRNOT00000050789	-1.52	-1.30	-0.35	1.17	7.47	7.96	1.30	2022-10-03	5961
chrX:29997897-30001413	ENSRNOT00000006777.3	Gpm6b	ENSRNOT00000006777	-1.89	-2.52	-0.58	1.32	7.71	7.99	0.50	3.30	3517
chr11:87097692-87098822	ENSRNOT00000002327.5	Abcf3	ENSRNOT00000002327	-1.85	-2.14	-0.38	1.46	7.71	7.90	1.17	3.50	1131
chr7:12833462-12833936	ENSRNOT00000031315.2	Lppr3	ENSRNOT00000031315	-1.96	-2.54	-0.51	1.45	2022-10-07	7.32	0.72	3.48	475
chr3:154140490-154146899	ENSRNOT00000045314.4	Rbck1	ENSRNOT00000045314	-1.97	-2.84	-0.43	1.55	6.94	7.21	0.50	3.62	6410
chr15:92760863-92760992	ENSRNOT00000013255.0	Rbm26	ENSRNOT00000013255	-2.53	-3.52	-0.59	1.94	7.60	7.87	0.50	4.30	130
chr16:60089267-60092516	ENSRNOT00000051720.0	Ppp1r3b	ENSRNOT00000051720	-1.92	-2.96	-0.41	1.51	8.15	7.28	1.73	3.81	3250
chr17:45196106-45196987	ENSRNOT00000059510.0	Lrrc16a	ENSRNOT00000059510	-2.14	-3.34	-0.59	1.55	7.74	7.76	0.50	3.86	882
chr3:100298716-100299250	ENSRNOT00000044143.0	Nat10	ENSRNOT00000044143	-1.61	-2.18	-0.59	2022-02-01	7.28	7.66	0.50	2022-06-03	535
chr5:152029909-152030103	ENSRNOT00000067663.0	Col16a1	ENSRNOT00000067663	-4.47	-5.33	-0.77	3.70	2022-11-07	7.86	0.00	2022-08-06	195
chr7:3353753-3354361	ENSRNOT00000030453.0	Itga7	ENSRNOT00000030453	-4.51	-5.81	-0.51	4.00	2022-07-07	7.64	0.80	7.19	609
chr7:3353923-3354361	ENSRNOT00000061657.0	Itga7	ENSRNOT00000061657	-4.51	-5.81	-0.51	4.00	2022-07-07	7.64	0.80	7.19	439
chr8:74948155-74950946	ENSRNOT00000023458.3	Cgnl1	ENSRNOT00000023458	-3.47	-4.48	-0.58	2.89	6.31	2022-02-07	0.00	5.18	2792
chr1:48987220-48987884	ENSRNOT00000034842.2	Fndc1	ENSRNOT00000034842	-1.72	-2.34	-0.32	1.40	6.63	7.16	0.80	3.67	665
chr13:78792800-78797326	ENSRNOT00000005353.4	Tdrd5	ENSRNOT00000005353	-1.80	-3.56	-0.59	1.21	7.91	7.22	0.50	3.37	4527
chr4:241019313-241021685	ENSRNOT00000055540.4	Abcc9	ENSRNOT00000055540	-2.74	-3.35	-0.39	2.35	7.13	7.37	1.24	4.83	2373
chr8:55191858-55207508	ENSRNOT00000034924.4	Rdx	ENSRNOT00000034924	-2.06	-3.25	-0.59	1.46	7.67	7.67	0.50	3.75	15651
chr20:36171292-36174466	ENSRNOT00000000468.3	Slc35f1	ENSRNOT00000000468	-1.62	-2.60	-0.51	2022-11-01	7.35	7.16	0.80	3.21	3175
chr2:230713564-230716233	ENSRNOT00000027493.3	5330417C22Rik	ENSRNOT00000027493	-1.94	-2.97	-0.58	1.35	6.62	7.24	0.00	3.59	2670
chr20:33700193-33704273	ENSRNOT00000072429.5	Hk1	ENSRNOT00000072429	-1.41	-2.06	-0.37	2022-03-01	7.76	7.47	1.30	2022-08-03	4081
chr1:32458264-32471392	ENSRNOT00000031083.7	RGD1310049	ENSRNOT00000031083	-1.62	-2.23	-0.59	2022-03-01	2022-04-07	7.38	0.50	2022-08-03	13129
chr8:62346404-62348550	ENSRNOT00000068340.3	Arid3b	ENSRNOT00000068340	-2.89	-3.73	-0.41	2.48	6.90	7.63	0.50	4.96	2147
chr20:7090591-7093413	ENSRNOT00000001153.3	Vwa7	ENSRNOT00000001153	-3.18	-4.64	-0.77	2.41	7.25	7.53	0.00	4.92	2823
chr9:94989403-94990037	ENSRNOT00000066839.0	Ugt1a3	ENSRNOT00000066839	-1.63	-2.83	-0.35	1.28	7.52	7.86	1.17	4.34	635
chr5:83890348-83891008	ENSRNOT00000075051.4	Tnc	ENSRNOT00000075051	-1.76	-3.36	-0.55	1.21	7.36	7.70	0.50	4.20	661
chr3:128861806-128864677	ENSRNOT00000055875.4	Anapc1	ENSRNOT00000055875	-1.89	-3.37	-0.31	1.58	7.15	7.40	1.30	4.92	2872
chr3:19689504-19693183	ENSRNOT00000007776.6	Cntrl	ENSRNOT00000007776	-1.61	-2.48	-0.60	2022-01-01	6.41	7.71	0.00	3.78	3680
chr1:196392541-196394582	ENSRNOT00000020077.5	Thumpd1	ENSRNOT00000020077	-1.71	-2.11	-0.57	1.14	7.73	7.47	0.50	2.35	2042
chr2:203634382-203634802	ENSRNOT00000074187.0	AABR06018631.1	ENSRNOT00000074187	-1.67	-3.73	-0.41	1.25	7.83	8.65	1.60	6.16	421
chr1:158465909-158466622	ENSRNOT00000022538.0	Rab38	ENSRNOT00000022538	-1.89	-3.52	-0.69	1.21	2022-09-08	8.58	2022-01-01	2022-02-05	714
chr1:88122206-88122264	ENSRNOT00000027212.0	Nfkbib	ENSRNOT00000027212	-2.09	-4.22	-0.83	1.26	7.60	8.52	0.00	5.13	59
chr12:32061700-32062699	ENSRNOT00000001202.0	Crcp	ENSRNOT00000001202	-2.31	-4.57	-0.69	1.63	8.14	8.38	2022-01-01	5.82	1000
chr19:67012418-67013416	ENSRNOT00000014090.0	Dbndd1	ENSRNOT00000014090	-1.93	-3.74	-0.64	1.29	8.65	8.95	1.17	5.20	999
chr5:130594909-130595691	ENSRNOT00000048784.0	Tceanc2	ENSRNOT00000048784	-1.95	-4.14	-0.75	1.20	8.51	8.56	0.80	4.99	783
chr3:180904230-180905301	ENSRNOT00000022073.2	Tcea2	ENSRNOT00000022073	-3.22	-6.20	-1.03	2.19	8.30	8.80	0.00	6.70	1072
chr1:143663341-143664344	ENSRNOT00000032294.3	Wdr73	ENSRNOT00000032294	-2.43	-4.75	-1.23	1.20	9.24	8.99	0.50	5.00	1004
chr1:171867146-171868194	ENSRNOT00000025245.0	Plekhb1	ENSRNOT00000025245	-1.71	-2.60	-0.53	1.18	8.75	9.00	1.30	4.15	1049
chr10:38897603-38898469	ENSRNOT00000010968.0	Irf1	ENSRNOT00000010968	-2.34	-3.87	-0.58	1.76	7.98	8.65	0.50	2022-05-05	867
chr12:43421507-43422281	ENSRNOT00000038736.0	Slc24a6	ENSRNOT00000038736	-2.66	-4.44	-0.99	1.67	2022-09-09	8.80	0.80	4.94	775
chr14:86034501-86034641	ENSRNOT00000031914.0	Rhbdd3	ENSRNOT00000031914	-2.35	-3.99	-0.99	1.36	8.49	8.96	0.00	4.46	141
chr15:23574028-23574620	ENSRNOT00000035491.0	Rcor2	ENSRNOT00000035491	-1.86	-3.30	-0.79	2022-07-01	8.18	8.34	0.50	3.97	593
chr19:62796782-62797312	ENSRNOT00000019923.0	Mlycd	ENSRNOT00000019923	-2.96	-3.69	-0.41	2.55	8.47	8.91	1.80	5.93	531
chr2:138573769-138573817	ENSRNOT00000065518.0	Zfp639	ENSRNOT00000065518	-1.83	-3.58	-0.79	2022-04-01	8.79	8.61	0.50	3.91	49
chr2:218172536-218173900	ENSRNOT00000028793.0	Txnip	ENSRNOT00000028793	-2.15	-2.92	-0.32	1.84	8.52	8.58	2.24	5.21	1365
chr2:142898506-142899610	ENSRNOT00000021453.0	Bbs7	ENSRNOT00000021453	-2.72	-4.37	-0.79	1.93	2022-09-08	8.51	0.50	5.30	1105
chr20:5907546-5908469	ENSRNOT00000041613.0	Rxrb	ENSRNOT00000041613	-1.93	-2.40	-0.63	1.30	2022-02-08	8.97	2022-01-01	4.36	924
chr20:7538716-7538878	ENSRNOT00000000559.0	Daxx	ENSRNOT00000000559	-1.79	-3.54	-0.77	2022-02-01	7.95	8.28	0.00	3.88	163
chr3:130286660-130287787	ENSRNOT00000034146.0	Mavs	ENSRNOT00000034146	-1.66	-2.71	-0.35	1.31	7.94	8.31	1.30	4.38	1128
chr5:163302214-163303262	ENSRNOT00000011394.0	Necap2	ENSRNOT00000011394	-2.12	-3.63	-0.58	1.54	7.49	2022-10-08	0.50	4.74	1049
chr7:54043635-54044111	ENSRNOT00000039096.0	Bbs10	ENSRNOT00000039096	-1.82	-2.77	-0.64	1.18	8.28	8.69	0.97	4.15	477
chr9:9286526-9286556	ENSRNOT00000072703.0	Dus3l	ENSRNOT00000072703	-1.42	-1.54	-0.33	2022-10-01	8.39	8.69	2.17	2022-01-04	31
chr6:102802460-102804989	ENSRNOT00000068757.4	Frmd6	ENSRNOT00000068757	-1.82	-3.07	-0.79	2022-03-01	8.42	8.74	0.50	3.89	2530
chr7:122660524-122665365	ENSRNOT00000068666.4	Xpnpep3	ENSRNOT00000068666	-2.18	-3.85	-0.79	1.39	8.72	8.88	0.50	4.52	4842
chr3:27056236-27070261	ENSRNOT00000066377.5	Strbp	ENSRNOT00000066377	-1.71	-2.95	-0.58	1.13	7.66	8.27	0.50	2022-07-04	14026
chr12:8573897-8576784	ENSRNOT00000001199.6	B3galtl	ENSRNOT00000001199	-1.84	-3.29	-0.58	1.27	7.58	2022-08-08	0.50	4.30	2888
chr1:21584247-21585933	ENSRNOT00000061404.5	L3mbtl3	ENSRNOT00000061404	-2.02	-3.09	-0.80	1.21	2022-10-09	8.93	1.30	4.22	1687
chr1:219250841-219251987	ENSRNOT00000024573.4	Tubgcp2	ENSRNOT00000024573	-1.64	-2.40	-0.53	2022-10-01	8.48	8.79	1.30	2022-01-04	1147
chr18:68767790-68773455	ENSRNOT00000021113.4	Smad4	ENSRNOT00000021113	-1.46	-2.30	-0.35	2022-11-01	7.71	8.13	1.30	2022-02-04	5666
chrX:135308636-135312390	ENSRNOT00000044487.7	Elf4	ENSRNOT00000044487	-2.27	-4.06	-0.63	1.65	8.48	8.33	2022-01-01	4.91	3755
chr15:91500401-91503015	ENSRNOT00000014747.3	Ednrb	ENSRNOT00000014747	-1.77	-2.78	-0.48	1.29	2022-04-08	2022-11-08	1.51	4.35	2615
chr3:42538123-42540577	ENSRNOT00000006172.3	Rbm43	ENSRNOT00000006172	-2.24	-3.95	-0.99	1.25	8.23	8.56	0.00	4.28	2455
chr14:70131548-70133197	ENSRNOT00000004912.5	Med28	ENSRNOT00000004912	-2.01	-3.57	-0.79	1.22	8.32	8.48	0.50	4.23	1650
chr6:118321300-118326275	ENSRNOT00000012495.5	Psen1	ENSRNOT00000012495	-2.03	-3.25	-0.99	2022-04-01	2022-07-08	8.74	0.00	3.92	4976
chr17:15862728-15870419	ENSRNOT00000019442.7	Shc3	ENSRNOT00000019442	-2.01	-3.25	-0.99	2022-03-01	8.32	8.96	0.00	3.89	7692
chrX:75641646-75646404	ENSRNOT00000067009.6	LOC100910646	ENSRNOT00000067009	-2.27	-4.61	-1.12	1.15	9.92	8.91	0.50	2022-10-04	4759
chr1:249224596-249225481	ENSRNOT00000065921.0	Tjp2	ENSRNOT00000065921	-1.78	-2.32	-0.41	1.37	7.39	2022-07-08	1.17	4.18	886
chr11:65569908-65618921	ENSRNOT00000068345.0	Naa50	ENSRNOT00000068345	-1.83	-2.72	-0.67	1.16	2022-04-08	8.39	0.80	3.86	49014
chr16:8888936-8889226	ENSRNOT00000027480.0	Fam35a	ENSRNOT00000027480	-2.26	-3.91	-0.95	1.32	8.21	8.40	0.00	2022-11-04	291
chr2:184990465-184990525	ENSRNOT00000013931.0	Smc4	ENSRNOT00000013931	-2.61	-4.13	-0.52	2022-09-02	8.94	8.67	1.30	5.16	61
chr20:7167969-7168193	ENSRNOT00000001121.0	Abhd16a	ENSRNOT00000001121	-3.70	-5.64	-0.93	2.77	9.55	8.96	0.80	5.84	225
chr3:87542673-87543253	ENSRNOT00000024280.0	Dgkz	ENSRNOT00000024280	-2.04	-2.34	-0.43	1.62	8.13	8.67	1.67	4.55	581
chr4:220847196-220849661	ENSRNOT00000073303.0	Pex26	ENSRNOT00000073303	-1.64	-2.93	-0.61	2022-03-01	8.95	8.67	2022-01-01	3.65	2466
chr7:117048588-117049331	ENSRNOT00000048446.0	Fam83h	ENSRNOT00000048446	-1.86	-2.39	-0.52	1.34	2022-03-08	8.49	1.30	4.15	744
chr8:114973120-114974112	ENSRNOT00000018932.0	Vprbp	ENSRNOT00000018932	-2.66	-3.66	-0.77	1.90	2022-02-09	8.93	1.30	4.87	993
chr10:70706990-70708905	ENSRNOT00000003492.5	Heatr6	ENSRNOT00000003492	-3.54	-5.11	-0.77	2.77	7.83	8.54	0.00	5.82	1916
chr4:148497166-148503524	ENSRNOT00000031365.7	Creb5	ENSRNOT00000031365	-1.82	-2.45	-0.54	1.27	8.40	8.78	1.22	2022-05-04	6359
chr17:77415390-77419994	ENSRNOT00000046266.5	Usp6nl	ENSRNOT00000046266	-3.33	-4.87	-0.67	2.66	8.35	8.40	0.80	5.72	4605
chr11:31022163-31025451	ENSRNOT00000002151.4	Bach1	ENSRNOT00000002151	-1.71	-1.74	-0.39	1.32	9.18	8.92	2.63	2022-11-04	3289
chr5:165468772-165472969	ENSRNOT00000041175.3	Prdm2	ENSRNOT00000041175	-1.87	-4.13	-0.75	2022-12-01	7.45	8.21	0.00	4.88	4198
chr8:57507568-57509284	ENSRNOT00000066197.5	Dmxl2	ENSRNOT00000066197	-1.51	-3.12	-0.48	2022-03-01	8.68	8.74	1.51	4.69	1717
chr7:122127946-122139717	ENSRNOT00000033975.0	Tnrc6b	ENSRNOT00000033975	-1.95	-3.63	-0.76	1.19	8.81	8.76	0.50	2022-07-04	11772
chr1:205429226-205429475	ENSRNOT00000027392.0	RGD1305592	ENSRNOT00000027392	-2.08	-3.67	-0.74	1.34	10.61	9.91	2022-01-03	5.99	250
chr1:263030909-263031740	ENSRNOT00000033780.0	Fgfbp3	ENSRNOT00000033780	-1.91	-3.90	-0.71	1.19	9.93	9.81	1.93	5.73	832
chr12:4334645-4335583	ENSRNOT00000071928.0	Pet100	ENSRNOT00000071928	-2.88	-4.61	-0.82	2022-06-02	2022-04-10	9.79	2.74	2022-10-07	939
chr5:146680981-146681498	ENSRNOT00000048293.0	Cdca8	ENSRNOT00000048293	-2.12	-4.47	-1.06	2022-06-01	9.35	9.35	0.97	5.44	518
chr3:100666773-100669089	ENSRNOT00000067085.7	Cd59	ENSRNOT00000067085	-2.26	-5.00	-1.23	2022-03-01	9.83	9.69	0.50	5.36	2317
chr9:79554310-79555879	ENSRNOT00000022076.4	Mar.04	ENSRNOT00000022076	-1.95	-3.77	-0.95	1.00	9.38	9.60	1.30	5.29	1570
chr10:72848961-72849854	ENSRNOT00000004540.0	Ppm1d	ENSRNOT00000004540	-2.45	-4.78	-1.12	1.33	9.59	9.79	0.50	5.49	894
chr12:39928538-39930274	ENSRNOT00000057814.0	Ccdc62	ENSRNOT00000057814	-2.03	-3.32	-0.41	1.62	8.19	2022-05-09	1.80	5.98	1737
chr18:47567821-47569094	ENSRNOT00000023507.0	Snx24	ENSRNOT00000023507	-1.51	-3.08	-0.41	2022-10-01	8.89	2022-08-09	1.80	2022-07-05	1274
chr6:119222052-119223033	ENSRNOT00000013516.0	Tgfb3	ENSRNOT00000013516	-1.59	-3.28	-0.53	2022-06-01	8.78	9.20	1.30	4.99	982
chr6:144259958-144260855	ENSRNOT00000015308.0	Trmt61a	ENSRNOT00000015308	-1.73	-2.17	-0.34	1.39	9.40	9.88	2.97	5.61	898
chr9:9341273-9342071	ENSRNOT00000071228.0	Ranbp3	ENSRNOT00000071228	-1.56	-2.34	-0.48	2022-08-01	2022-12-09	9.45	2.36	2022-03-05	799
chr15:2360176-2361089	ENSRNOT00000019644.4	Zfp503	ENSRNOT00000019644	-2.99	-5.78	-0.74	2.25	9.81	9.37	1.51	6.86	914
chr6:96299097-96301048	ENSRNOT00000066702.5	Prpf39	ENSRNOT00000066702	-2.11	-4.01	-0.63	1.48	8.56	9.32	2022-01-01	5.77	1952
chr11:69201577-69203553	ENSRNOT00000042864.3	Gtf2e1	ENSRNOT00000042864	-2.53	-5.64	-1.33	1.19	9.41	2022-01-09	0.00	5.23	1977
chr18:55747142-55751949	ENSRNOT00000024374.6	Slc26a2	ENSRNOT00000024374	-1.47	-3.20	-0.46	2022-01-01	8.99	2022-09-09	1.59	4.90	4808
chr3:156435349-156436720	ENSRNOT00000022428.3	E2f1	ENSRNOT00000022428	-1.74	-3.36	-0.63	2022-11-01	9.21	9.13	1.80	2022-10-05	1372
chr19:35779113-35782750	ENSRNOT00000005770.6	Pkn1	ENSRNOT00000005770	-1.95	-4.60	-0.79	1.16	8.95	2022-01-09	0.50	5.17	3638
chr11:56397216-56403063	ENSRNOT00000002700.7	Bbx	ENSRNOT00000002700	-2.02	-4.25	-0.79	1.23	8.72	9.25	0.50	5.29	5848
chr3:45710464-45715774	ENSRNOT00000048804.8	Galnt13	ENSRNOT00000048804	-1.61	-2.69	-0.50	2022-11-01	9.50	9.61	2.29	2022-09-05	5311
chrX:124483461-124486588	ENSRNOT00000049424.3	Zbtb33	ENSRNOT00000049424	-2.20	-4.08	-0.59	1.62	9.32	9.25	1.96	5.96	3128
chr19:48543994-48550074	ENSRNOT00000024197.8	Gfod2	ENSRNOT00000024197	-1.73	-2.94	-0.46	1.27	8.87	9.71	1.59	5.38	6081
chr1:228048612-228049059	ENSRNOT00000028262.0	Ltbp3	ENSRNOT00000028262	-1.88	-3.23	-0.64	1.24	9.44	9.37	1.66	4.83	448
chr18:79994869-79997023	ENSRNOT00000021729.0	Zadh2	ENSRNOT00000021729	-2.10	-2.86	-0.34	1.76	9.90	9.71	2.90	5.57	2155
chr20:20623399-20627486	ENSRNOT00000000748.0	Ipmk	ENSRNOT00000000748	-2.62	-3.79	-0.50	2022-11-02	9.73	9.82	2.17	2022-05-06	4088
chr3:118083734-118086227	ENSRNOT00000056392.0	Rtf1	ENSRNOT00000056392	-2.85	-3.83	-0.47	2.38	2022-07-09	9.19	2.30	6.26	2494
chr4:224569290-224570434	ENSRNOT00000055985.0	Zfp384	ENSRNOT00000055985	-1.92	-2.33	-0.49	1.43	9.20	9.79	2.21	5.13	1145
chr8:76216787-76218329	ENSRNOT00000017918.0	Rnf111	ENSRNOT00000017918	-1.42	-1.97	-0.41	2022-02-01	9.78	9.70	2.57	4.46	1543
chr15:92760821-92760992	ENSRNOT00000013297.1	Rbm26	ENSRNOT00000013297	-2.16	-3.56	-0.47	1.70	8.97	9.38	1.51	5.48	172
chr7:2684896-2686261	ENSRNOT00000049536.3	Stat2	ENSRNOT00000049536	-2.05	-3.62	-0.81	1.24	2022-12-09	9.17	1.15	4.83	1366
chr5:14112726-14115192	ENSRNOT00000067977.4	Mybl1	ENSRNOT00000067977	-1.89	-3.30	-0.60	1.29	9.57	9.38	1.80	4.92	2467
chr3:125885614-125889055	ENSRNOT00000015568.4	Sppl2a	ENSRNOT00000015568	-2.25	-2.95	-0.49	1.76	9.18	9.58	2.21	5.56	3442
chr2:62338132-62341567	ENSRNOT00000017571.3	Mier3	ENSRNOT00000017571	-2.02	-3.27	-0.40	1.63	8.70	2022-03-09	1.80	5.40	3436
chr3:169493259-169494722	ENSRNOT00000009517.2	Prex1	ENSRNOT00000009517	-2.00	-3.88	-0.67	1.32	8.90	9.19	0.80	4.97	1464
chr2:76227840-76234215	ENSRNOT00000016036.4	Lifr	ENSRNOT00000016036	-1.63	-2.14	-0.54	2022-09-01	9.51	9.93	2022-01-02	4.57	6376
chr2:120446436-120449534	ENSRNOT00000067556.7	Ythdf3	ENSRNOT00000067556	-1.95	-2.85	-0.56	1.40	9.50	9.79	1.95	2022-09-05	3099
chr1:144641681-144648636	ENSRNOT00000026754.9	Hdgfrp3	ENSRNOT00000026754	-2.68	-4.33	-0.94	1.74	2022-11-09	9.53	0.77	5.53	6956
chr14:43847495-43850810	ENSRNOT00000031792.2	N4bp2	ENSRNOT00000031792	-1.92	-3.22	-0.69	1.23	9.68	9.76	1.51	4.81	3316
chr4:10985923-10988695	ENSRNOT00000066643.3	Magi2	ENSRNOT00000066643	-2.95	-5.16	-1.06	1.89	9.58	9.67	0.50	5.75	2773
chr10:14140446-14143852	ENSRNOT00000022050.4	Cramp1l	ENSRNOT00000022050	-1.76	-1.72	-0.35	1.41	9.21	9.76	2.83	2022-10-05	3407
chr5:117491575-117493794	ENSRNOT00000010621.5	Plaa	ENSRNOT00000010621	-1.68	-3.03	-0.66	2022-02-01	9.85	9.69	1.59	4.47	2220
chr9:67102510-67107599	ENSRNOT00000036194.7	Raph1	ENSRNOT00000036194	-2.89	-4.44	-1.16	1.73	10.18	9.84	1.41	5.51	5090
chr2:158930294-158937548	ENSRNOT00000014317.0	Slc7a11	ENSRNOT00000014317	-1.56	-4.17	-0.56	1.00	9.99	9.67	1.96	5.82	7255
chr5:166572596-166575169	ENSRNOT00000022185.0	Vps13d	ENSRNOT00000022185	-3.15	-4.80	-0.92	2.24	9.22	9.45	0.80	5.83	2574
Table S11 : Over-transported transcripts in NT-3 treated axons as compared to NGF-treated axons. Columns represent: 1- Coordinate of the 3’ UTR isoform in Rn5, 2- 3’ UTR isoform unique ID, 3- Rn5 rat gene symbol, 4- Ensembl Rn5 transcript ID, 5- predicted difference in axonal localisation score between NGF and NT-3, 6- predicted difference in relative abundance ratios (ax/cb) between NGF and NT-3…
