# Supplementary material for: The predicted RNA-binding protein regulome of axonal mRNAs
Source: HighWire-hosted journal article supplement (doi:10.1101/gr.277804.123), 2023-08-15
Supplement: Supplemental_Tables.zip [file Supplemental Table S12.xlsx]

## Sheet: Sheet1
Clips	RBPs	Rn5	Condensate_Zscore	logFC_deg_cb	PVal_deg_cb	diff.transport	transport.ngf	transport.nt3	cb.ngf	cb.nt3	axons.ngf	axons.nt3
BUD13_1_HepG2	BUD13	Bud13	2.48	-0.205888689	-0.205888689	1.030281	0.4339162	-0.5963648	8.371114	8.314069	2.960575	1.005444
BUD13_2_HepG2	BUD13	Bud13	2.48	-0.205888689	-0.205888689	1.030281	0.4339162	-0.5963648	8.371114	8.314069	2.960575	1.005444
BUD13_1_K652	BUD13	Bud13	2.48	-0.205888689	-0.205888689	1.030281	0.4339162	-0.5963648	8.371114	8.314069	2.960575	1.005444
BUD13_2_K652	BUD13	Bud13	2.48	-0.205888689	-0.205888689	1.030281	0.4339162	-0.5963648	8.371114	8.314069	2.960575	1.005444
CSTF2T_2_HepG2	CSTF2T	Cstf2t	2.77	-0.38882334	-0.38882334	-1.36707669278193	-1.68402965454308	-0.31695296176115	11.0241407312033	10.786235294247	1.87633891471864	3.4034073270165
DDX24_1_K652	DDX24	Ddx24	1.94	0.118482492	0.118482492	-0.79665375034871	-0.405607449624573	0.391046300724137	10.2169126300989	10.4734733187588	3.69512100264996	4.12794671725097
DDX24_2_K652	DDX24	Ddx24	1.94	0.118482492	0.118482492	-0.79665375034871	-0.405607449624573	0.391046300724137	10.2169126300989	10.4734733187588	3.69512100264996	4.12794671725097
DDX3X_1_HepG2	DDX3X	Ddx3x	2.49	-0.316793906	-0.316793906	-1.17179	-0.7139929	0.4577972	14.00612	13.88878	7.629731	7.418468
DDX3X_2_K652	DDX3X	Ddx3x	2.49	-0.316793906	-0.316793906	-1.17179	-0.7139929	0.4577972	14.00612	13.88878	7.629731	7.418468
DDX55_1_K652	DDX55	Ddx55	1.68	0.001498959	0.001498959	0.2291953	-0.4275931	-0.6567884	6.362997	6.512682	0.503634	0
EFTUD2_1_HepG2	EFTUD2	Eftud2	2022-09-02	0.149429072	0.149429072	0.6792375	0.3181259	-0.3611116	8.631154	8.93413	2.30367	1.667492
EIF4G2_1_K652	EIF4G2	Eif4g2	2.13	-0.040797405	-0.040797405	-0.2274961	0.3553645	0.5828606	15.35053	15.41637	10.35057	10.061
EIF4G2_2_K652	EIF4G2	Eif4g2	2.13	-0.040797405	-0.040797405	-0.2274961	0.3553645	0.5828606	15.35053	15.41637	10.35057	10.061
FMR1_1_K652	FMR1	Fmr1	2.57	-0.181296299	-0.181296299	0.865617464243794	0.333669255698031	-0.531948208545762	10.4670880547835	10.4922556123299	4.20853211333732	2.67293628192777
FMR1_2_K652	FMR1	Fmr1	2.57	-0.181296299	-0.181296299	0.865617464243794	0.333669255698031	-0.531948208545762	10.4670880547835	10.4922556123299	4.20853211333732	2.67293628192777
FXR2_1_K652	FXR2	Fxr2	2.53	-0.071555835	-0.071555835	0.123854147001332	0.885055584287415	0.761201437286083	10.9439662861451	11.0246162587405	6.50382647918925	6.36625727355595
FXR2_2_K652	FXR2	Fxr2	2.53	-0.071555835	-0.071555835	0.123854147001332	0.885055584287415	0.761201437286083	10.9439662861451	11.0246162587405	6.50382647918925	6.36625727355595
GRWD1_1_HepG2	GRWD1	Grwd1	2022-09-01	0.47786526	0.47786526	0.226523654626343	-0.631713115097869	-0.858236769724212	9.50058665132695	10.0387703610311	1.80276668513062	2.0099815366562
GRWD1_2_HepG2	GRWD1	Grwd1	2022-09-01	0.47786526	0.47786526	0.226523654626343	-0.631713115097869	-0.858236769724212	9.50058665132695	10.0387703610311	1.80276668513062	2.0099815366562
IGF2BP2_1_K652	IGF2BP2	Igf2bp2	NA	0.510722228	0.510722228	NA	NA	NA	NA	NA	NA	NA
METAP2_2_K652	METAP2	Metap2	2.15	-0.183536155	-0.183536155	-1.2852842418839	-0.380802284207053	0.904481957676849	11.7110530243955	11.7757555969578	5.70498983257655	7.5173009261972
MTPAP_1_K652	MTPAP	Mtpap	1.73	-0.209314316	-0.209314316	1.123202	0.6090649	-0.5141367	5.642047	5.449343	1.298528	0
PPIG_1_HepG2	PPIG	Ppig	2.36	0.039617976	0.039617976	-1.17612	-0.3504704	0.8256494	8.462604	8.349458	2.006799	3.292746
PPIG_2_HepG2	PPIG	Ppig	2.36	0.039617976	0.039617976	-1.17612	-0.3504704	0.8256494	8.462604	8.349458	2.006799	3.292746
PPIL4_2_K652	PPIL4	Ppil4	2022-08-02	-0.062235082	-0.062235082	1.28196	0.7396901	-0.5422695	4.956543	5.30178	1.007268	0
PRPF8_1_HepG2	PRPF8	Prpf8	2022-05-02	0.440246827	0.440246827	-1.21753468580235	-0.480697150764571	0.736837535037783	11.1952456716099	11.7874766637039	4.09635233029242	6.20086465386927
PRPF8_2_HepG2	PRPF8	Prpf8	2022-05-02	0.440246827	0.440246827	-1.21753468580235	-0.480697150764571	0.736837535037783	11.1952456716099	11.7874766637039	4.09635233029242	6.20086465386927
PRPF8_1_K652	PRPF8	Prpf8	2022-05-02	0.440246827	0.440246827	-1.21753468580235	-0.480697150764571	0.736837535037783	11.1952456716099	11.7874766637039	4.09635233029242	6.20086465386927
PRPF8_2_K652	PRPF8	Prpf8	2022-05-02	0.440246827	0.440246827	-1.21753468580235	-0.480697150764571	0.736837535037783	11.1952456716099	11.7874766637039	4.09635233029242	6.20086465386927
PTBP1_1_K652	PTBP1	Ptbp1	2.36	1.423965695	1.423965695	-0.6522895	1.151811	8041-01-01	8.262635	9.862861	5.050187	6.259466
PTBP1_2_K652	PTBP1	Ptbp1	2.36	1.423965695	1.423965695	-0.6522895	1.151811	8041-01-01	8.262635	9.862861	5.050187	6.259466
RBM15_1_HepG2	RBM15	Rbm15	2.56	NA	NA	NA	NA	NA	NA	NA	NA	NA
RBM15_1_K652	RBM15	Rbm15	2.56	NA	NA	NA	NA	NA	NA	NA	NA	NA
RBM15_2_K652	RBM15	Rbm15	2.56	NA	NA	NA	NA	NA	NA	NA	NA	NA
SF3B4_2_HepG2	SF3B4	Sf3b4	2.89	0.508723624	0.508723624	1.89473513315139	0.517984423549288	-1.3767507096021	11.5235356700065	12.1340395524458	7.10845588211601	3.89053966977715
SF3B4_1_K652	SF3B4	Sf3b4	2.89	0.508723624	0.508723624	1.89473513315139	0.517984423549288	-1.3767507096021	11.5235356700065	12.1340395524458	7.10845588211601	3.89053966977715
SF3B4_2_K652	SF3B4	Sf3b4	2.89	0.508723624	0.508723624	1.89473513315139	0.517984423549288	-1.3767507096021	11.5235356700065	12.1340395524458	7.10845588211601	3.89053966977715
SLTM_2_K652	SLTM	Sltm	2.71	-0.160570345	-0.160570345	-0.20444787582507	0.321481620959886	0.525929496784956	11.7593022843417	11.7481739235172	6.23570440334457	6.32057686799686
SMNDC1_1_K652	SMNDC1	Smndc1	1.86	0.018306888	0.018306888	1.020914	0.445632	-0.5752817	9.157814	9.33989	3.920909	1.876339
SRSF1_1_HepG2	SRSF1	Srsf1	2.96	-0.474406506	-0.474406506	-2.00185728500557	0.374893424596532	2.3767507096021	11.4078762263025	10.6885842640822	5.7264504286799	7.0851812412295
SRSF1_2_HepG2	SRSF1	Srsf1	2.96	-0.474406506	-0.474406506	-2.00185728500557	0.374893424596532	2.3767507096021	11.4078762263025	10.6885842640822	5.7264504286799	7.0851812412295
SRSF1_1_K652	SRSF1	Srsf1	2.96	-0.474406506	-0.474406506	-2.00185728500557	0.374893424596532	2.3767507096021	11.4078762263025	10.6885842640822	5.7264504286799	7.0851812412295
SRSF7_1_K652	SRSF7	Srsf7	2.84	-0.081213416	-0.081213416	-0.385422036354248	-1.44490555142168	-1.05948351506743	12.684784975513	12.6676859114204	4.02476761601664	4.51009480469765
SRSF7_2_K652	SRSF7	Srsf7	2.84	-0.081213416	-0.081213416	-0.385422036354248	-1.44490555142168	-1.05948351506743	12.684784975513	12.6676859114204	4.02476761601664	4.51009480469765
SRSF9_1_HepG2	SRSF9	Srsf9	2.56	0.074511631	0.074511631	-0.8021636	0.7862167	1.58838	8.904307	9.137752	4.577044	6.438669
SUB1_1_HepG2	SUB1	Sub1	-0.27	-0.07788961	-0.07788961	1.972467	2.552842	0.5803746	12.75412	12.77625	10.38649	6.716543
SUB1_2_HepG2	SUB1	Sub1	-0.27	-0.07788961	-0.07788961	1.972467	2.552842	0.5803746	12.75412	12.77625	10.38649	6.716543
TARDBP_iClip	TARDBP	Tardbp	2.87	0.089265434	0.089265434	-1.548394	-1.025949	0.5224447	8.814375	9.084092	0	3.998724
TRA2A_1_K652	TRA2A	Tra2a	2022-05-03	0.30677754	0.30677754	0.7950661	1.628932	0.833866	11.61835	12.07247	9.092369	7.613866
TRA2A_2_K652	TRA2A	Tra2a	2022-05-03	0.30677754	0.30677754	0.7950661	1.628932	0.833866	11.61835	12.07247	9.092369	7.613866
U2AF1_2_HepG2	U2AF1	U2af1	NA	-0.372536189	-0.372536189	-1.76124404183506	-1.05305672930217	0.708187312532881	11.6374165116816	11.4238542064771	3.82812095102075	8.39670822467253
U2AF1_1_K652	U2AF1	U2af1	NA	-0.372536189	-0.372536189	-1.76124404183506	-1.05305672930217	0.708187312532881	11.6374165116816	11.4238542064771	3.82812095102075	8.39670822467253
UCHL5_1_HepG2	UCHL5	Uchl5	1.89	-0.111227741	-0.111227741	0.6101948	1.924453	1.314258	8.12904	8.148635	6.361036	4.384731
UCHL5_2_HepG2	UCHL5	Uchl5	1.89	-0.111227741	-0.111227741	0.6101948	1.924453	1.314258	8.12904	8.148635	6.361036	4.384731
UCHL5_2_K652	UCHL5	Uchl5	1.89	-0.111227741	-0.111227741	0.6101948	1.924453	1.314258	8.12904	8.148635	6.361036	4.384731
XRN2_1_K652	XRN2	Xrn2	2.23	0.362457083	0.362457083	-0.2790379	0.3106911	0.589729	7.463831	7.902501	1.670404	2.203065
XRN2_2_K652	XRN2	Xrn2	2.23	0.362457083	0.362457083	-0.2790379	0.3106911	0.589729	7.463831	7.902501	1.670404	2.203065
ZNF622_1_K652	ZNF622	Znf622	2022-11-02	NA	NA	NA	NA	NA	NA	NA	NA	NA
ZNF622_2_K652	ZNF622	Znf622	2022-11-02	NA	NA	NA	NA	NA	NA	NA	NA	NA
ZRANB2_2_K652	ZRANB2	Zranb2	2.65	-0.126894667	-0.126894667	-0.3610456	-0.9240882	-0.5630427	9.218827	9.140663	1.005444	1.910412
Table S12 : Positive RBP regulators of axonal localisation. Columns represent: 1- CLIP sequencing experiment ID, 2- Human protein symbol of the clipped RNA binding protein (RBP), 3- Rat Rn5 gene symbol of the clipped RBP, 4- Z-score of the propensity of the clipped RBP to localize into cellular condensates as predicted by GraPES (Kuechler et al. 2022), 5- Change in gene expression between NGF and…
