# Supplementary material for: The predicted RNA-binding protein regulome of axonal mRNAs
Source: HighWire-hosted journal article supplement (doi:10.1101/gr.277804.123), 2023-08-15
Supplement: Supplemental_Tables.zip [file Supplemental Table S13.xlsx]

## Sheet: Sheet1
Clips	RBPs	Rn5	Condensate_Zscore	logFC_deg_cb	PVal_deg_cb	diff.transport	transport.ngf	transport.nt3	cb.ngf	cb.nt3	axons.ngf	axons.nt3
CELF2_iClip	CELF2	CELF2	2022-05-02	-0.353002613	-0.353002613	-1.879521	0.328087	2.207608	6.701821	7.160249	1.005444	4.367098
CELF4_iClip	CELF4	CELF4	2022-05-02	-0.060499113	-0.060499113	-1.12696518470918	-0.71602071576152	0.410944468947656	11.0882375434217	11.6280995123033	4.40768356091517	5.84967103862243
EIF4E_iClip	EIF4E	EIF4E	NA	-0.230844493	-0.230844493	2558-01-01	0.7830428	-0.4727569	12.43766	12.50978	8.306331	5.405812
FUBP3_1_HepG2	FUBP3	Fubp3	2022-08-02	-0.489985262	-0.489985262	-1.140183	-0.7375489	0.4026339	9.801059	9.627324	1.509078	3.288025
FUBP3_2_HepG2	FUBP3	Fubp3	2022-08-02	-0.489985262	-0.489985262	-1.140183	-0.7375489	0.4026339	9.801059	9.627324	1.509078	3.288025
HNRNPC_iClip	HNRNPC	HNRNPC	2.63	-0.248741636	-0.248741636	1.656348	0.4501388	-1.20621	13.09111	13.1184	9.329961	5.569595
ELAVL1_iClip	ELAVL1	Elavl1	2.45	0.327787989	0.327787989	2.171714	1.657577	-0.5141367	5.559989	5.937816	2.684088	0
IGF2BP2_iClip	IGF2BP2	Igf2bp2	NA	0.510722228	0.510722228	NA	NA	NA	NA	NA	NA	NA
KHDRBS1_1_K652	KHDRBS1	Khdrbs1	2.79	-0.316925994	-0.316925994	-1.811824	-0.8043771	1.007446	9.129925	8.916052	1.300957	3.848198
KHDRBS1_2_K652	KHDRBS1	Khdrbs1	2.79	-0.316925994	-0.316925994	-1.811824	-0.8043771	1.007446	9.129925	8.916052	1.300957	3.848198
KHSRP_1_K652	KHSRP	Khsrp	3.34	0.589918659	0.589918659	-1.577791	-0.4963455	1.081445	7.179864	7.990079	0.7613489	2.984232
KHSRP_2_K652	KHSRP	Khsrp	3.34	0.589918659	0.589918659	-1.577791	-0.4963455	1.081445	7.179864	7.990079	0.7613489	2.984232
PUM2_1_K652	PUM2	Pum2	2.52	-0.09725908	-0.09725908	-1.96471238141792	-1.57675412606319	0.38795825535473	10.5082879238884	10.0775324801051	0.294905950191276	3.96728362985799
TIA1_2_HepG2	TIA1	Tia1	2.79	0.233682974	0.233682974	1.00169	0.5553308	-0.4463597	8.064542	7.963161	3.814568	1.005444
TIA1_iClip	TIA1	Tia1	2.79	0.233682974	0.233682974	1.00169	0.5553308	-0.4463597	8.064542	7.963161	3.814568	1.005444
TIAL1_iClip	TIAL1	Tail1	2.81	NA	NA	NA	NA	NA	NA	NA	NA	NA
Negative regulation of translation	3.53e-05
Regulation of mrna stability	9.32e-05
mRNA transport	0.0224
Cytoplasmic stress granule	5.48e-09
Table S13 : Negative RBP regulators of axonal localisation. Columns represent: 1- CLIP sequencing experiment ID, 2- Human protein symbol of the clipped RNA binding protein (RBP), 3- Rat Rn5 gene symbol of the clipped RBP, 4- Z-score of the propensity of the clipped RBP to localize into cellular condensates as predicted by GraPES (Kuechler et al. 2022), 5- Change in gene expression between NGF and…
