# Supplementary material for: The predicted RNA-binding protein regulome of axonal mRNAs
Source: HighWire-hosted journal article supplement (doi:10.1101/gr.277804.123), 2023-08-15
Supplement: Supplemental_Tables.zip [file Supplemental Table S14.xlsx]

## Sheet: Sheet1
Ensembl	GS	imIDp	uniqueID	dPUD(Ip/(Ip+Id))	mPUD.axon	mPUD.cb	dRUD(Id/Ip)	mRUD.axon	mRUD.cb	FDR	proxi.cb	dist.cb	proxi.ax	dist.ax
ENSRNOT00000025794	Sod2	ENSRNOT00000025794.1	ENSRNOT00000025794.0	0.39	0.97	0.58	-4.44	4.92	0.48	3.57E-175	9324-04-01	6711.72	956.77	26.16
ENSRNOT00000072556	Zfp383	ENSRNOT00000072556.1	ENSRNOT00000072556.0	0.51	0.71	0.21	-3.62	1.71	-1.92	8.01E-28	417.37	1578.79	272.63	344.44
ENSRNOT00000025791	Nolc1	ENSRNOT00000025791.1	ENSRNOT00000025791.0	0.38	0.61	0.23	-2.37	0.65	-1.71	1.52E-54	4060.91	13281.82	331.31	290.20
ENSRNOT00000028703	Cebpg	ENSRNOT00000028703.1	ENSRNOT00000028703.0	0.54	0.63	0.09	-4.51	2022-12-01	-3.38	2.65E-207	802.02	8378.48	433.64	349.29
ENSRNOT00000026595	Btbd1	ENSRNOT00000026595.1	ENSRNOT00000026595.0	0.45	0.65	0.20	-3.65	1.64	-2.01	1.45E-163	3346.36	13491.41	498.69	235.96
ENSRNOT00000065288	Nrip3	ENSRNOT00000065288.1	ENSRNOT00000065288.0	0.41	0.47	0.06	-3.71	-0.31	-4.02	1.48E-72	460.10	7547.17	203.94	491.11
ENSRNOT00000038138	Drap1	ENSRNOT00000038138.1	ENSRNOT00000038138.0	0.58	0.98	0.41	-5.43	4.89	-0.54	1.77E-38	432.53	630.10	117.07	2022-02-02
ENSRNOT00000027459	Asrgl1	ENSRNOT00000027459.1	ENSRNOT00000027459.0	0.45	0.99	0.54	-4.66	4.89	0.23	5.16E-19	345.45	300.20	82.63	2022-01-01
ENSRNOT00000015771	LOC100912050	ENSRNOT00000015771.1	ENSRNOT00000015771.0	0.21	0.92	0.70	-3.83	2022-06-05	1.23	1.07E-20	743.54	311.62	447.88	44.24
ENSRNOT00000003514	Carhsp1	ENSRNOT00000003514.1	ENSRNOT00000003514.0	0.30	0.72	0.42	-1.85	1.37	-0.48	6.69E-39	1662.83	2311-11-01	426.06	178.79
ENSRNOT00000004999	Cdip1	ENSRNOT00000004999.1	ENSRNOT00000004999.0	0.59	0.93	0.34	-4.56	3.60	-0.96	8.23E-62	1089.90	2126.87	171.72	2022-11-11
ENSRNOT00000018149	G3bp1	ENSRNOT00000018149.1	ENSRNOT00000018149.0	0.15	0.94	0.79	-2.77	4.65	1.88	1.34E-16	6057.17	1643.03	235.25	2022-06-06
ENSRNOT00000027957	G6PC	ENSRNOT00000027957.1	ENSRNOT00000027957.0	0.35	0.50	0.15	-2.53	0.02	-2.51	1.54E-82	2066.57	11823.74	290.40	286.06
ENSRNOT00000004373	C1qtnf1	ENSRNOT00000004373.1	ENSRNOT00000004373.0	0.75	0.87	0.12	-5.36	2.52	-2.84	2.91E-41	345.15	2430-10-01	59.60	2022-10-10
ENSRNOT00000009943	Mtmr4	ENSRNOT00000009943.1	ENSRNOT00000009943.0	0.40	0.52	0.13	-3.27	0.47	-2.80	1.20E-29	1251.92	8688.28	132.83	226.97
ENSRNOT00000028368	Lsm12	ENSRNOT00000028368.1	ENSRNOT00000028368.0	0.62	0.86	0.24	-4.24	2.62	-1.62	9.75E-34	665.05	2051-01-01	72.53	7.78
ENSRNOT00000004290	Timp2	ENSRNOT00000004290.1	ENSRNOT00000004290.0	0.32	1.00	0.68	-3.04	4.15	2022-11-01	1.03E-05	649.39	294.75	35.15	0.00
ENSRNOT00000073321	Fasn	ENSRNOT00000073321.1	ENSRNOT00000073321.0	0.27	0.59	0.32	-1.74	0.65	-1.09	2.56E-19	2160.20	4563.23	105.96	48.48
ENSRNOT00000002222	Wrb	ENSRNOT00000002222.1	ENSRNOT00000002222.0	0.58	0.72	0.13	-3.98	1.29	-2.69	1.62E-102	680.40	4424-04-01	224.95	107.98
ENSRNOT00000046159	Ube2l3	ENSRNOT00000046159.1	ENSRNOT00000046159.0	0.17	0.81	0.65	-1.35	2.21	0.87	4.29E-45	4263.64	2333.84	1794.04	438.18
ENSRNOT00000068345	Naa50	ENSRNOT00000068345.1	ENSRNOT00000068345.0	0.39	1.00	0.61	-5.51	6.13	0.62	1.29E-58	807.07	523.64	334.95	2022-02-02
ENSRNOT00000035611	Kpna1	ENSRNOT00000035611.1	ENSRNOT00000035611.0	0.64	0.95	0.31	-4.53	3.37	-1.16	1.86E-16	458.28	1023.84	38.48	1.92
ENSRNOT00000002545	Hic2	ENSRNOT00000002545.1	ENSRNOT00000002545.0	0.70	0.78	0.08	-5.47	1.95	-3.52	3.45E-24	152.53	1682.22	31.31	2022-09-09
ENSRNOT00000005289	RGD1306487	ENSRNOT00000005289.1	ENSRNOT00000005289.0	0.21	0.47	0.26	-1.25	-0.23	-1.48	4.84E-122	6372.42	17768.69	523.23	246.46
ENSRNOT00000003460	Mrps14	ENSRNOT00000003460.1	ENSRNOT00000003460.0	0.48	0.69	0.22	-3.39	1.51	-1.88	9.30E-85	2931-01-01	10660.40	213.94	59.60
ENSRNOT00000006154	Cox20	ENSRNOT00000006154.1	ENSRNOT00000006154.0	0.15	1.00	0.84	-5.24	7.68	2.44	2.41E-38	2650.51	485.76	616.46	2022-01-01
ENSRNOT00000004083	Tiprl	ENSRNOT00000004083.1	ENSRNOT00000004083.0	0.47	0.66	0.18	-3.70	1.55	-2.15	8.65E-87	1666.46	7411.62	168.59	32.32
ENSRNOT00000003087	Slain2	ENSRNOT00000003087.1	ENSRNOT00000003087.0	0.47	0.60	0.13	-3.46	0.73	-2.73	6.04E-105	573.13	3823.84	204.75	74.75
ENSRNOT00000060193	Mrpl52	ENSRNOT00000060193.1	ENSRNOT00000060193.0	0.32	0.45	0.13	-2.46	-0.28	-2.74	2.16E-56	292.83	1954.44	270.91	345.96
ENSRNOT00000012400	Fermt2	ENSRNOT00000012400.1	ENSRNOT00000012400.0	0.30	0.57	0.26	-1.94	0.44	-1.49	2.22E-34	6131.72	17185.05	246.36	208.69
ENSRNOT00000026914	Mdp1	ENSRNOT00000026914.1	ENSRNOT00000026914.0	0.43	0.98	0.55	-4.99	5.27	0.28	7.37E-38	496.87	403.13	208.38	2022-06-06
ENSRNOT00000026039	Polb	ENSRNOT00000026039.1	ENSRNOT00000026039.0	0.70	0.99	0.29	-6.46	5.15	-1.31	3.38E-57	291.52	725.35	126.26	2022-02-02
ENSRNOT00000057386	Col4a1	ENSRNOT00000057386.1	ENSRNOT00000057386.0	0.21	0.75	0.54	-1.38	1.58	0.21	2.04E-27	740.10	629.80	846.06	279.39
ENSRNOT00000019556	Fam32a	ENSRNOT00000019556.1	ENSRNOT00000019556.0	0.54	0.98	0.45	-5.14	4.83	-0.31	1.30E-29	629.49	783.33	98.89	2022-02-02
ENSRNOT00000024781	Isca1	ENSRNOT00000024781.1	ENSRNOT00000024781.0	0.68	0.85	0.18	-4.83	2.62	-2.21	0.00E+00	1835.15	8515.66	792.73	134.24
ENSRNOT00000068545	Crem	ENSRNOT00000068545.1	ENSRNOT00000068545.0	0.19	0.98	0.80	-4.65	6.65	2022-01-02	4.88E-183	2059.49	501.31	6885.76	123.74
ENSRNOT00000066805	Cul2	ENSRNOT00000066805.1	ENSRNOT00000066805.0	0.27	0.93	0.66	-2.63	3.59	0.97	3.25E-17	4327.78	2208.59	178.69	14.14
ENSRNOT00000039377	Riok3	ENSRNOT00000039377.1	ENSRNOT00000039377.0	0.38	0.48	0.09	-3.15	-0.14	-3.29	1.23E-102	1787.58	17406.57	251.92	301.41
ENSRNOT00000026989	Paip2	ENSRNOT00000026989.1	ENSRNOT00000026989.0	0.33	0.46	0.13	-2.45	-0.24	-2.69	2.72E-216	3845.66	24543.94	1057.58	1600.91
ENSRNOT00000021061	Rnf138	ENSRNOT00000021061.2	ENSRNOT00000021061.0	0.53	0.70	0.18	-3.70	1.48	-2.22	1.44E-40	535.56	2487-07-01	184.65	173.74
ENSRNOT00000023874	Rit2	ENSRNOT00000023874.1	ENSRNOT00000023874.0	0.38	0.62	0.24	-3.12	1.45	-1.67	2.45E-162	7115.76	22797.58	837.07	591.41
ENSRNOT00000072494	LOC288913	ENSRNOT00000072494.1	ENSRNOT00000072494.0	0.26	0.98	0.72	-3.51	4.88	1.38	1.20E-31	1723.33	666.46	296.57	2022-05-05
ENSRNOT00000036658	Gpbp1	ENSRNOT00000036658.1	ENSRNOT00000036658.0	0.20	0.81	0.61	-1.91	2.56	0.65	2.18E-12	8513-03-01	5460.30	106.97	2022-11-11
ENSRNOT00000015720	Stmn2	ENSRNOT00000015720.1	ENSRNOT00000015720.0	0.23	0.49	0.26	-1.46	-0.07	-1.53	0.00E+00	116434.55	333967.88	24065.96	23578.48
ENSRNOT00000058116	Ufm1	ENSRNOT00000058116.1	ENSRNOT00000058116.0	0.71	0.97	0.26	-6.16	4.68	-1.48	2.70E-87	693.13	1931.82	177.58	2022-05-05
ENSRNOT00000024364	Ubap2l	ENSRNOT00000024364.1	ENSRNOT00000024364.0	0.25	0.80	0.55	-1.54	1.83	0.29	1.54E-03	1047.58	852.73	31.92	6.97
ENSRNOT00000028389	Snx27	ENSRNOT00000028389.1	ENSRNOT00000028389.0	0.50	0.53	0.03	-5.33	0.27	-5.06	3.74E-67	140.10	4745-05-01	108.69	229.09
ENSRNOT00000047836	Rap1a	ENSRNOT00000047836.1	ENSRNOT00000047836.0	0.16	1.00	0.84	-2.28	4.64	2.36	3.44E-04	4013.43	778.99	51.52	0.00
ENSRNOT00000001095	Tubb5	ENSRNOT00000001095.1	ENSRNOT00000001095.0	0.20	0.97	0.77	-3.14	4.89	1.75	0.00E+00	34868.28	10521.11	7133.94	239.09
ENSRNOT00000000467	Nus1	ENSRNOT00000000467.1	ENSRNOT00000000467.0	0.44	0.49	0.05	-4.14	-0.07	-4.22	1.62E-102	569.60	10480.91	159.60	175.35
ENSRNOT00000067004	Ccar1	ENSRNOT00000067004.1	ENSRNOT00000067004.0	0.44	0.97	0.53	-4.09	4.29	0.20	1.37E-18	1084.65	944.55	81.21	2022-02-02
ENSRNOT00000013378	Rabgap1	ENSRNOT00000013378.1	ENSRNOT00000013378.0	0.25	0.49	0.24	-1.59	-0.08	-1.66	2.84E-09	7092-12-01	22482.22	57.58	57.47
ENSRNOT00000039065	Gorasp2	ENSRNOT00000039065.1	ENSRNOT00000039065.0	0.28	0.56	0.29	-1.70	0.37	-1.33	1.41E-17	3514.34	8811-01-01	118.59	85.66
ENSRNOT00000023017	B2m	ENSRNOT00000023017.1	ENSRNOT00000023017.0	0.52	0.82	0.30	-3.62	2.39	-1.22	0.00E+00	5317.27	12472.63	2832.63	497.68
ENSRNOT00000016220	Mapre1	ENSRNOT00000016220.1	ENSRNOT00000016220.0	0.29	0.39	0.10	-2.47	-0.64	-3.11	4.80E-160	6693.43	58222.73	501.92	752.02
ENSRNOT00000017373	Uap1l1	ENSRNOT00000017373.1	ENSRNOT00000017373.0	0.41	0.96	0.55	-3.73	4.00	0.26	4.74E-12	450.91	378.79	52.53	2022-01-01
ENSRNOT00000018001	Chchd3	ENSRNOT00000018001.3	ENSRNOT00000018001.0	0.29	0.71	0.41	-1.77	1.27	-0.50	3.38E-34	2403.84	3413.94	338.48	142.22
ENSRNOT00000012021	Mrpl35	ENSRNOT00000012021.1	ENSRNOT00000012021.0	0.42	0.99	0.57	-5.76	6.19	0.43	2.06E-151	4107.68	3068.99	737.78	2022-08-08
ENSRNOT00000065926	Lyrm2	ENSRNOT00000065926.1	ENSRNOT00000065926.0	0.77	0.90	0.13	-6.69	3.96	-2.74	6.28E-220	184.04	1245.66	459.09	56.57
ENSRNOT00000011508	Atp6v1g1	ENSRNOT00000011508.1	ENSRNOT00000011508.0	0.16	0.28	0.12	-1.55	-1.37	-2.93	1.18E-241	14433.43	109645.76	1718.99	4483.64
ENSRNOT00000017998	Ppt1	ENSRNOT00000017998.1	ENSRNOT00000017998.0	0.37	0.79	0.42	-2.53	2022-05-02	-0.47	1.71E-48	2006.57	2786.26	484.14	188.08
ENSRNOT00000055562	Ctnnbip1	ENSRNOT00000055562.1	ENSRNOT00000055562.0	0.48	0.91	0.44	-3.77	3.39	-0.38	0.00E+00	2727-07-01	3587.47	1942-12-01	170.61
ENSRNOT00000010893	Tcea1	ENSRNOT00000010893.1	ENSRNOT00000010893.0	0.32	0.66	0.34	-2.68	1.72	-0.96	2.68E-14	2006.36	3930.51	223.94	199.49
ENSRNOT00000020722	Pole3	ENSRNOT00000020722.1	ENSRNOT00000020722.0	0.55	0.99	0.44	-5.82	5.45	-0.36	1.83E-61	439.39	565.25	210.71	2022-02-02
ENSRNOT00000017156	Zcchc17	ENSRNOT00000017156.1	ENSRNOT00000017156.0	0.36	1.00	0.64	-4.90	5.73	0.82	1.77E-31	745.25	420.20	180.20	0.00
ENSRNOT00000041937	Kif1b	ENSRNOT00000041937.1	ENSRNOT00000041937.0	0.46	0.55	0.09	-3.60	0.27	-3.33	3.79E-18	50.81	518.48	40.91	35.96
ENSRNOT00000019620	Rer1	ENSRNOT00000019620.1	ENSRNOT00000019620.0	0.48	0.82	0.33	-3.15	2.15	-1.00	0.00E+00	4026.26	7990.81	1839.49	413.94
ENSRNOT00000035362	Ypel5	ENSRNOT00000035362.1	ENSRNOT00000035362.0	0.28	0.93	0.65	-4.77	5.66	0.89	0.00E+00	6802.83	3674.85	2279.19	19.19
ENSRNOT00000013695	Eif5	ENSRNOT00000013695.1	ENSRNOT00000013695.0	0.37	0.58	0.21	-2.88	0.95	-1.93	1.72E-282	6597.17	25149.70	1838.89	1894.75
ENSRNOT00000041325	Atcay	ENSRNOT00000041325.1	ENSRNOT00000041325.0	0.46	0.82	0.36	-2.73	1.92	-0.81	1.11E-05	299.39	526.67	2022-12-22	2022-05-05
ENSRNOT00000015869	R3hdm4	ENSRNOT00000015869.1	ENSRNOT00000015869.0	0.22	0.60	0.39	-1.26	0.61	-0.65	1.70E-38	751.31	1182.53	1034.65	673.13
ENSRNOT00000006209	Rad21	ENSRNOT00000006209.1	ENSRNOT00000006209.0	0.22	0.51	0.28	-1.38	0.05	-1.34	0.00E+00	6938.89	17547.58	15368.38	16266.16
ENSRNOT00000055271	Ppp1r1a	ENSRNOT00000055271.1	ENSRNOT00000055271.0	0.43	0.54	0.11	-3.20	0.25	-2.95	3.32E-13	34.44	265.45	83.74	125.76
ENSRNOT00000036556	Tusc2	ENSRNOT00000036556.1	ENSRNOT00000036556.0	0.58	0.64	0.07	-5.02	1.24	-3.78	3.42E-64	245.56	3375.96	116.97	109.90
ENSRNOT00000027520	Slc25a20	ENSRNOT00000027520.1	ENSRNOT00000027520.0	0.30	0.80	0.50	-2.48	2.49	0.02	1.47E-20	5257.47	5201.72	373.74	152.32
ENSRNOT00000015598	Rab11a	ENSRNOT00000015598.1	ENSRNOT00000015598.0	0.20	0.67	0.47	-1.19	2022-04-01	-0.16	1.37E-37	10722.42	12028.48	670.40	313.74
ENSRNOT00000064114	Higd1a	ENSRNOT00000064114.1	ENSRNOT00000064114.0	0.47	0.62	0.15	-3.23	0.69	-2.53	2.29E-27	2470-10-01	14297.68	68.69	47.47
ENSRNOT00000022854	Ppp1r7	ENSRNOT00000022854.1	ENSRNOT00000022854.0	0.29	0.88	0.59	-2.76	3.30	0.54	8.76E-20	2181.52	1501.21	147.27	2022-12-12
ENSRNOT00000022822	Trip12	ENSRNOT00000022822.1	ENSRNOT00000022822.0	0.30	0.96	0.66	-3.56	4.53	0.96	1.45E-72	10899.60	5637-07-01	553.54	17.78
ENSRNOT00000044787	Hmg1l1	ENSRNOT00000044787.1	ENSRNOT00000044787.0	0.32	0.60	0.28	-1.96	0.60	-1.36	4.34E-57	1270.20	3372.63	353.43	217.88
ENSRNOT00000061455	Ube2a	ENSRNOT00000061455.1	ENSRNOT00000061455.0	0.26	0.49	0.23	-1.49	-0.24	-1.73	6.08E-14	1461.72	4813.94	154.65	213.94
ENSRNOT00000075942	Eif2s3y	ENSRNOT00000075942.3	ENSRNOT00000075942.0	0.18	0.86	0.68	-2.39	3.48	2022-09-01	7.06E-24	11495.25	5349.80	390.71	47.47
ENSRNOT00000005165	Tspan6	ENSRNOT00000005165.1	ENSRNOT00000005165.0	0.21	0.89	0.68	-2.50	3.59	2022-09-01	2.74E-31	4469.80	2097.78	1115.35	220.00
ENSRNOT00000019987	Acer3	ENSRNOT00000019987.2	ENSRNOT00000019987.6	0.30	0.89	0.58	-2.84	3.33	0.49	8.19E-19	2236.67	1593.94	213.74	36.26
ENSRNOT00000021671	Parva	ENSRNOT00000021671.3	ENSRNOT00000021671.4	0.55	0.99	0.44	-6.21	5.83	-0.39	1.59E-268	1752.12	2201-01-01	994.65	15.15
ENSRNOT00000021671	Parva	ENSRNOT00000021671.3	ENSRNOT00000021671.6	0.26	0.30	0.04	-3.47	-1.24	-4.71	0.00E+00	1752.12	45131.01	994.65	2399-09-01
ENSRNOT00000025782	Eif3c	ENSRNOT00000025782.0	ENSRNOT00000025782.5	0.36	0.97	0.61	-4.31	4.97	0.66	4.10E-79	8299.80	5334.44	476.77	13.74
ENSRNOT00000026428	Stard10	ENSRNOT00000026428.0	ENSRNOT00000026428.2	0.33	0.97	0.64	-3.95	4.79	0.84	1.37E-16	258.99	144.04	110.00	2022-01-01
ENSRNOT00000028028	Sdhaf2	ENSRNOT00000028028.1	ENSRNOT00000028028.4	0.53	0.73	0.20	-3.78	1.78	-1.99	5.36E-139	1547.27	6165.66	303.43	59.49
ENSRNOT00000036303	AABR06002662.1	ENSRNOT00000036303.0	ENSRNOT00000036303.2	0.32	0.91	0.59	-2.67	3.21	0.54	1.01E-10	252.63	174.34	90.91	2022-08-08
ENSRNOT00000046311	RGD1307262	ENSRNOT00000046311.0	ENSRNOT00000046311.3	0.30	0.98	0.68	-3.95	2022-01-05	2022-06-01	1.98E-27	1125.66	539.60	226.87	2022-06-06
ENSRNOT00000056024	Svip	ENSRNOT00000056024.2	ENSRNOT00000056024.4	0.45	0.62	0.17	-2.99	0.69	-2.29	1.19E-188	1646.46	8113.64	641.31	430.00
ENSRNOT00000058943	LOC100362069	ENSRNOT00000058943.0	ENSRNOT00000058943.3	0.33	0.99	0.66	-4.83	5.77	0.94	4.38E-35	489.09	251.62	268.69	2022-03-03
ENSRNOT00000065288	Nrip3	ENSRNOT00000065288.1	ENSRNOT00000065288.5	0.51	1.00	0.49	-6.76	6.68	-0.09	2.91E-55	460.10	488.38	203.94	0.00
ENSRNOT00000066596	Atl3	ENSRNOT00000066596.2	ENSRNOT00000066596.4	0.47	0.96	0.49	-4.39	4.34	-0.05	3.05E-18	876.16	905.56	70.40	1.82
ENSRNOT00000064285	Psmd11	ENSRNOT00000064285.1	ENSRNOT00000064285.4	0.21	0.70	0.49	-2.20	2022-12-02	-0.08	1.09E-11	3440.91	3651.92	81.52	16.97
ENSRNOT00000002511	Mzt2b	ENSRNOT00000002511.1	ENSRNOT00000002511.4	0.18	0.97	0.78	-2.89	4.74	1.85	7.22E-07	429.70	117.78	113.13	3.64
ENSRNOT00000002545	Hic2	ENSRNOT00000002545.1	ENSRNOT00000002545.5	0.61	1.00	0.39	-4.73	2022-04-04	-0.69	1.10E-11	152.53	226.87	31.31	0.00
ENSRNOT00000001265	LOC100361811	ENSRNOT00000001265.1	ENSRNOT00000001265.3	0.18	0.99	0.80	-4.10	2022-10-06	2022-01-02	0.00E+00	10358.99	2574.65	18279.80	276.57
ENSRNOT00000061229	Ubl3	ENSRNOT00000061229.1	ENSRNOT00000061229.3	0.40	0.47	0.07	-3.44	-0.20	-3.64	1.93E-36	600.30	7509.80	88.28	145.35
ENSRNOT00000061229	Ubl3	ENSRNOT00000061229.1	ENSRNOT00000061229.5	0.16	1.00	0.84	-3.09	5.49	2.41	2.29E-06	600.30	111.52	88.28	0.00
ENSRNOT00000004319	Degs1	ENSRNOT00000004319.0	ENSRNOT00000004319.3	0.15	0.86	0.71	-2.35	3.66	1.31	1.05E-13	3963.74	1584.55	137.37	4.95
ENSRNOT00000005272	Tmem183a	ENSRNOT00000005272.1	ENSRNOT00000005272.6	0.25	0.57	0.32	-1.60	0.49	-1.10	2.65E-153	3821.62	8212-02-01	1381.62	857.27
ENSRNOT00000043004	Pbx1	ENSRNOT00000043004.2	ENSRNOT00000043004.6	0.70	0.81	0.11	-6.82	3.88	-2.94	1.12E-108	194.95	1509.90	166.67	22.22
ENSRNOT00000074527	LOC100911356	ENSRNOT00000074527.1	ENSRNOT00000074527.4	0.43	0.64	0.22	-3.32	1.45	-1.87	1.84E-31	358.38	1317.07	110.81	55.45
ENSRNOT00000007824	Pno1	ENSRNOT00000007824.1	ENSRNOT00000007824.5	0.36	0.99	0.63	-3.68	4.46	0.77	6.99E-15	1045.96	612.53	84.85	2022-01-01
ENSRNOT00000009649	Psmc6	ENSRNOT00000009649.2	ENSRNOT00000009649.5	0.24	0.93	0.69	-3.81	4.98	1.17	5.33E-71	16895.56	7451.72	590.81	13.74
ENSRNOT00000010759	Rpl15	ENSRNOT00000010759.0	ENSRNOT00000010759.2	0.30	0.96	0.67	-5.16	6.18	2022-02-01	0.00E+00	5799.80	2843.43	3209.60	94.95
ENSRNOT00000010759	Rpl15	ENSRNOT00000010759.0	ENSRNOT00000010759.3	0.21	0.93	0.72	-4.93	6.31	1.38	7.13E-181	5799.80	2221-01-01	3209.60	193.54
ENSRNOT00000012530	Dnajc15	ENSRNOT00000012530.0	ENSRNOT00000012530.2	0.24	1.00	0.76	-5.61	7.25	1.64	1.53E-39	650.71	202.42	429.80	0.00
ENSRNOT00000015605	Wbp4	ENSRNOT00000015605.0	ENSRNOT00000015605.3	0.41	0.62	0.22	-2.97	2022-08-01	-1.88	5.78E-41	2557.37	9493-03-01	216.97	199.39
ENSRNOT00000039423	Ndfip2	ENSRNOT00000039423.1	ENSRNOT00000039423.6	0.27	1.00	0.72	-5.69	2022-10-07	1.41	2.90E-72	8947.47	3487.58	551.72	2022-02-02
ENSRNOT00000042606	Sugt1	ENSRNOT00000042606.2	ENSRNOT00000042606.3	0.15	0.98	0.83	-2.95	5.22	2.27	1.50E-15	4976.16	1031.21	261.11	2022-04-04
ENSRNOT00000061214	RGD1306063	ENSRNOT00000061214.1	ENSRNOT00000061214.8	0.42	0.89	0.47	-3.67	3.50	-0.17	1.32E-52	653.23	728.28	478.48	92.83
ENSRNOT00000016995	Vps36	ENSRNOT00000016995.0	ENSRNOT00000016995.2	0.28	0.75	0.47	-1.67	1.48	-0.19	2.17E-07	795.05	908.79	73.74	26.26
ENSRNOT00000016995	Vps36	ENSRNOT00000016995.0	ENSRNOT00000016995.6	0.61	0.69	0.08	-4.65	1.14	-3.51	2.03E-52	795.05	9058-08-01	73.74	34.34
ENSRNOT00000026039	Polb	ENSRNOT00000026039.1	ENSRNOT00000026039.2	0.71	0.98	0.27	-6.37	4.94	-1.43	1.77E-60	291.52	793.43	126.26	2022-02-02
ENSRNOT00000036092	Zdhhc2	ENSRNOT00000036092.1	ENSRNOT00000036092.3	0.40	0.48	0.09	-3.27	-0.11	-3.39	2.30E-254	2194.95	22993.94	560.51	576.57
ENSRNOT00000018458	Mplkip	ENSRNOT00000018458.1	ENSRNOT00000018458.4	0.41	0.98	0.57	-4.48	4.90	0.42	6.25E-22	538.28	401.82	104.95	0.81
ENSRNOT00000019040	Ssr1	ENSRNOT00000019040.1	ENSRNOT00000019040.6	0.35	0.54	0.19	-2.55	0.43	-2.12	1.48E-13	823.43	3563-03-01	156.26	293.43
ENSRNOT00000020204	Crem	ENSRNOT00000020204.0	ENSRNOT00000020204.6	0.18	0.98	0.81	-4.61	6.72	2022-11-02	1.58E-171	2039.80	462.93	6934.14	115.66
ENSRNOT00000023519	Nrsn1	ENSRNOT00000023519.1	ENSRNOT00000023519.4	0.25	0.44	0.19	-1.72	-0.36	-2.08	0.00E+00	8993.54	38228.08	4071.52	6144.34
ENSRNOT00000024545	Ccny	ENSRNOT00000024545.0	ENSRNOT00000024545.5	0.24	0.97	0.73	-3.72	5.15	1.44	6.25E-40	1007.07	371.52	383.23	2022-03-03
ENSRNOT00000025462	Ctsl	ENSRNOT00000025462.1	ENSRNOT00000025462.4	0.21	0.73	0.52	-1.52	1.62	0.10	1.81E-38	20112.83	18687.17	973.74	428.99
ENSRNOT00000074146	Crem	ENSRNOT00000074146.1	ENSRNOT00000074146.6	0.17	0.98	0.81	-4.58	6.72	2.14	4.63E-169	2082.83	462.93	6941.31	115.66
ENSRNOT00000025172	Gnal	ENSRNOT00000025172.2	ENSRNOT00000025172.3	0.21	0.43	0.23	-1.36	-0.38	-1.75	1.18E-07	120.81	410.40	78.69	96.77
ENSRNOT00000027343	Pcdhac1	ENSRNOT00000027343.1	ENSRNOT00000027343.2	0.18	0.50	0.32	-1.09	0.00	-1.08	4.05E-12	18031.01	38123.13	148.48	132.02
ENSRNOT00000030399	Afg3l1	ENSRNOT00000030399.0	ENSRNOT00000030399.3	0.62	0.97	0.35	-5.60	4.70	-0.89	3.58E-56	739.09	1379.49	146.36	2022-04-04
ENSRNOT00000051594	Znrf2	ENSRNOT00000051594.2	ENSRNOT00000051594.5	0.16	0.73	0.56	-2.12	2.48	0.37	5.89E-28	2141-11-01	1662.63	221.92	2022-06-26
ENSRNOT00000009046	Rpl34	ENSRNOT00000009046.0	ENSRNOT00000009046.4	0.27	1.00	0.73	-8.66	2022-11-10	1.45	0.00E+00	6241.92	2247.47	4973.74	2022-04-04
ENSRNOT00000015720	Stmn2	ENSRNOT00000015720.1	ENSRNOT00000015720.2	0.23	0.45	0.22	-1.52	-0.28	-1.80	0.00E+00	116434.55	401127.78	24065.96	27224.14
ENSRNOT00000016329	Rps3a	ENSRNOT00000016329.0	ENSRNOT00000016329.3	0.19	0.99	0.80	-5.59	7.61	2022-02-02	3.79E-109	3745.96	925.35	1500.40	2022-07-07
ENSRNOT00000018830	Snapin	ENSRNOT00000018830.1	ENSRNOT00000018830.4	0.22	0.67	0.44	-1.82	1.49	-0.33	5.93E-22	1721.21	2166.87	426.06	231.31
ENSRNOT00000028744	Anp32e	ENSRNOT00000028744.0	ENSRNOT00000028744.3	0.43	0.77	0.33	-3.08	2022-08-02	-1.00	3.94E-61	4225.56	8468.59	232.32	51.41
ENSRNOT00000051977	Rsrc1	ENSRNOT00000051977.2	ENSRNOT00000051977.3	0.50	0.76	0.26	-3.69	2.17	-1.52	3.68E-40	802.83	2306.36	200.00	111.11
ENSRNOT00000000304	Rtn4ip1	ENSRNOT00000000304.1	ENSRNOT00000000304.3	0.68	0.98	0.30	-5.06	3.83	-1.23	1.08E-23	293.43	691.82	53.43	2022-02-02
ENSRNOT00000000304	Rtn4ip1	ENSRNOT00000000304.1	ENSRNOT00000000304.4	0.43	1.00	0.57	-4.24	4.63	0.39	2.33E-12	293.43	223.54	53.43	0.00
ENSRNOT00000000753	Tfam	ENSRNOT00000000753.1	ENSRNOT00000000753.6	0.21	0.97	0.76	-3.30	4.98	1.69	6.03E-11	1259.70	392.02	118.99	2022-02-02
ENSRNOT00000001664	Ddt	ENSRNOT00000001664.0	ENSRNOT00000001664.5	0.42	0.99	0.56	-6.02	6.37	0.35	1.54E-85	1113.54	873.64	439.80	2022-06-06
ENSRNOT00000008427	Srsf6	ENSRNOT00000008427.1	ENSRNOT00000008427.5	0.15	0.99	0.84	-5.05	7.46	2.41	1.20E-92	13678.48	2585.56	1460.30	5.76
ENSRNOT00000009000	Cd44	ENSRNOT00000009000.1	ENSRNOT00000009000.5	0.22	0.34	0.12	-1.89	-0.98	-2.87	2.55E-78	1799.19	13152.32	432.53	870.10
ENSRNOT00000012287	Cops2	ENSRNOT00000012287.1	ENSRNOT00000012287.7	0.20	0.91	0.71	-2.75	2022-08-04	1.33	1.59E-18	7314-04-01	2909-09-01	321.92	31.31
ENSRNOT00000013445	Serinc3	ENSRNOT00000013445.0	ENSRNOT00000013445.3	0.19	0.82	0.63	-2.75	3.53	0.78	8.39E-110	31866.97	18556.46	1277.68	149.09
ENSRNOT00000016837	Sestd1	ENSRNOT00000016837.1	ENSRNOT00000016837.4	0.18	0.96	0.78	-3.56	5.36	1.81	2.83E-34	965.86	274.24	433.23	2022-03-03
ENSRNOT00000016837	Sestd1	ENSRNOT00000016837.1	ENSRNOT00000016837.6	0.19	0.55	0.37	-2.67	1.88	-0.79	8.96E-49	965.86	1670.00	433.23	190.91
ENSRNOT00000017373	Uap1l1	ENSRNOT00000017373.1	ENSRNOT00000017373.6	0.26	1.00	0.74	-2.98	4.50	1.52	1.47E-06	450.91	155.56	52.53	0.00
ENSRNOT00000020478	Pdia3	ENSRNOT00000020478.1	ENSRNOT00000020478.3	0.40	0.68	0.28	-2.43	2022-07-01	-1.36	5.86E-23	2272.73	5829.49	102.83	49.49
ENSRNOT00000030192	Ddrgk1	ENSRNOT00000030192.0	ENSRNOT00000030192.2	0.21	1.00	0.79	-5.84	7.76	1.93	2.61E-58	3314.85	869.09	654.55	2022-01-01
ENSRNOT00000064323	Ddx31	ENSRNOT00000064323.1	ENSRNOT00000064323.4	0.39	1.00	0.61	-3.88	4.50	0.62	5.58E-11	354.75	228.89	52.53	0.00
ENSRNOT00000074392	Snap23	ENSRNOT00000074392.2	ENSRNOT00000074392.4	0.24	1.00	0.76	-4.72	6.41	1.69	3.17E-17	659.19	199.49	168.48	0.00
ENSRNOT00000008325	Ndufa5	ENSRNOT00000008325.0	ENSRNOT00000008325.3	0.24	0.99	0.75	-5.42	6.99	1.57	0.00E+00	13064.95	4452-02-01	3711.82	28.89
ENSRNOT00000009503	Serbp1	ENSRNOT00000009503.1	ENSRNOT00000009503.8	0.17	0.98	0.81	-3.35	5.46	2022-11-02	7.04E-34	12171.52	2847.27	534.34	10.00
ENSRNOT00000010253	Chmp3	ENSRNOT00000010253.0	ENSRNOT00000010253.3	0.26	0.67	0.41	-1.57	2022-04-01	-0.53	2.97E-286	11199.80	16197.27	2645.35	1004.75
ENSRNOT00000013600	Brk1	ENSRNOT00000013600.1	ENSRNOT00000013600.2	0.18	0.72	0.54	-1.16	1.36	0.21	4.26E-65	11530.20	9989-09-01	1703.54	672.32
ENSRNOT00000019713	Tgoln2	ENSRNOT00000019713.1	ENSRNOT00000019713.2	0.69	0.96	0.27	-5.52	2022-09-04	-1.43	1.70E-73	582.53	1575.86	151.52	2022-04-04
ENSRNOT00000038964	Tatdn2	ENSRNOT00000038964.0	ENSRNOT00000038964.2	0.41	0.96	0.55	-3.80	2022-09-04	0.29	2.68E-20	1745.56	1439.90	100.81	2022-04-04
ENSRNOT00000038964	Tatdn2	ENSRNOT00000038964.0	ENSRNOT00000038964.5	0.54	0.91	0.37	-3.85	2022-10-03	-0.75	8.86E-31	1745.56	2938.89	100.81	10.00
ENSRNOT00000072271	Znrf2	ENSRNOT00000072271.1	ENSRNOT00000072271.7	0.36	0.96	0.60	-4.16	4.73	0.57	1.97E-35	3212.42	2174.14	201.72	2022-06-06
ENSRNOT00000073039	Chl1	ENSRNOT00000073039.2	ENSRNOT00000073039.4	0.32	0.80	0.47	-1.94	1.79	-0.15	3.03E-07	3729.39	4133.13	48.48	2022-11-11
ENSRNOT00000000161	Mast2	ENSRNOT00000000161.0	ENSRNOT00000000161.3	0.72	0.98	0.26	-6.45	4.94	-1.51	2.34E-79	555.05	1590.61	156.26	2022-03-03
ENSRNOT00000014904	Rpl22	ENSRNOT00000014904.1	ENSRNOT00000014904.2	0.77	0.84	0.07	-6.20	2.56	-3.64	2.46E-291	506.06	6318.79	369.39	72.73
ENSRNOT00000019959	AI314180	ENSRNOT00000019959.1	ENSRNOT00000019959.2	0.30	0.97	0.67	-3.63	4.66	2022-03-01	3.28E-26	3916.97	1922.63	202.93	2022-06-06
ENSRNOT00000020722	Pole3	ENSRNOT00000020722.1	ENSRNOT00000020722.3	0.75	0.97	0.23	-6.43	4.66	-1.77	8.11E-111	439.39	1501.31	210.71	2022-06-06
ENSRNOT00000035252	Elavl4	ENSRNOT00000035252.0	ENSRNOT00000035252.4	0.26	0.47	0.21	-1.46	-0.48	-1.94	6.51E-56	6459-09-01	24812.63	286.87	270.30
ENSRNOT00000061139	Pnisr	ENSRNOT00000061139.1	ENSRNOT00000061139.5	0.26	0.97	0.70	-3.41	4.65	1.24	3.78E-27	5408.99	2312.93	281.72	2022-03-13
ENSRNOT00000065909	Creb3	ENSRNOT00000065909.1	ENSRNOT00000065909.3	0.28	1.00	0.72	-4.19	5.58	1.39	8.14E-13	2268.59	860.51	93.74	0.00
ENSRNOT00000010753	Psma3	ENSRNOT00000010753.1	ENSRNOT00000010753.4	0.21	0.99	0.78	-4.78	6.61	1.83	3.00E-33	6124.65	1708.59	340.40	2022-01-01
ENSRNOT00000011718	Cog5	ENSRNOT00000011718.2	ENSRNOT00000011718.4	0.45	1.00	0.55	-5.75	2022-03-06	0.28	7.50E-36	443.64	368.08	154.55	0.00
ENSRNOT00000011718	Cog5	ENSRNOT00000011718.2	ENSRNOT00000011718.7	0.28	0.93	0.65	-3.33	4.24	0.92	3.75E-18	443.64	237.98	154.55	5.96
ENSRNOT00000040440	Zc3h14	ENSRNOT00000040440.1	ENSRNOT00000040440.3	0.35	0.99	0.64	-5.25	2022-05-06	0.80	2.79E-42	4007.17	2302.42	241.21	1.92
ENSRNOT00000005491	Atp2b1	ENSRNOT00000005491.0	ENSRNOT00000005491.2	0.20	0.35	0.15	-1.41	-1.06	-2.47	2.15E-26	1569.39	8712.93	211.62	429.09
ENSRNOT00000005491	Atp2b1	ENSRNOT00000005491.0	ENSRNOT00000005491.4	0.38	0.58	0.20	-3.97	1.94	-2.03	9.06E-27	1569.39	6399.39	211.62	298.48
ENSRNOT00000005803	Dcaf13	ENSRNOT00000005803.0	ENSRNOT00000005803.2	0.21	0.99	0.78	-3.65	5.47	1.83	1.27E-21	4773.43	1345.25	261.11	2022-04-04
ENSRNOT00000009152	Nhp2l1	ENSRNOT00000009152.0	ENSRNOT00000009152.2	0.28	0.38	0.10	-2.40	-0.80	-3.20	3.03E-70	2747.27	25314.44	450.40	1344.65
ENSRNOT00000009425	Ndufa7	ENSRNOT00000009425.0	ENSRNOT00000009425.2	0.50	0.64	0.15	-4.59	2022-04-02	-2.55	2.29E-57	719.29	4168.38	350.40	536.06
ENSRNOT00000010720	Cand1	ENSRNOT00000010720.0	ENSRNOT00000010720.4	0.25	0.98	0.73	-4.60	2022-02-06	1.43	1.77E-76	9625.76	3584.34	658.18	5.96
ENSRNOT00000016520	Samm50	ENSRNOT00000016520.0	ENSRNOT00000016520.4	0.23	1.00	0.77	-2.66	4.41	1.75	1.25E-04	1202.02	352.63	41.41	0.00
ENSRNOT00000024576	Abhd17a	ENSRNOT00000024576.0	ENSRNOT00000024576.4	0.50	0.99	0.49	-5.55	5.48	-0.06	1.50E-45	602.83	616.36	183.54	2022-03-03
ENSRNOT00000035628	Ywhaz	ENSRNOT00000035628.0	ENSRNOT00000035628.3	0.33	0.69	0.36	-2.23	1.42	-0.81	0.00E+00	39218.89	68513.84	3362.53	1318.89
ENSRNOT00000041354	Atp2b1	ENSRNOT00000041354.0	ENSRNOT00000041354.4	0.38	0.58	0.20	-3.97	1.94	-2.03	9.06E-27	1569.39	6399.39	211.62	298.48
ENSRNOT00000048848	Rbms2	ENSRNOT00000048848.0	ENSRNOT00000048848.10	0.51	0.99	0.48	-6.82	6.73	-0.09	1.98E-156	276.16	302.42	1166.06	10.71
ENSRNOT00000013608	Eef1a1	ENSRNOT00000013608.2	ENSRNOT00000013608.3	0.23	0.93	0.69	-2.79	3.98	1.19	0.00E+00	108481.72	48009.70	15126.77	1429.80
ENSRNOT00000015741	Senp6	ENSRNOT00000015741.1	ENSRNOT00000015741.5	0.24	0.98	0.75	-3.26	4.82	1.56	2.52E-11	3153.74	1071.41	120.20	2.93
ENSRNOT00000019539	Ube2q2	ENSRNOT00000019539.2	ENSRNOT00000019539.3	0.49	0.64	0.15	-3.28	0.83	-2.46	4.73E-144	776.77	4272.93	422.73	245.45
ENSRNOT00000019539	Ube2q2	ENSRNOT00000019539.2	ENSRNOT00000019539.4	0.55	0.62	0.07	-4.57	0.77	-3.79	1.16E-278	776.77	10780.40	422.73	241.31
ENSRNOT00000030221	AABR06055804.1	ENSRNOT00000030221.0	ENSRNOT00000030221.4	0.55	0.96	0.41	-5.54	2022-02-05	-0.52	4.20E-232	2115.45	3002.22	817.88	30.30
ENSRNOT00000030221	AABR06055804.1	ENSRNOT00000030221.0	ENSRNOT00000030221.5	0.62	0.93	0.31	-5.25	2022-09-04	-1.16	1.46E-281	2115.45	4701.62	817.88	71.62
ENSRNOT00000052392	Cadm1	ENSRNOT00000052392.2	ENSRNOT00000052392.3	0.58	0.95	0.37	-4.95	4.18	-0.77	0.00E+00	2597.78	4440.81	2211.62	116.97
ENSRNOT00000014939	Trak2	ENSRNOT00000014939.1	ENSRNOT00000014939.3	0.26	0.83	0.56	-1.89	2.26	0.37	5.06E-149	1035.86	797.17	57701.11	11748.48
ENSRNOT00000015034	Trak2	ENSRNOT00000015034.1	ENSRNOT00000015034.3	0.26	0.83	0.56	-1.89	2.26	0.37	5.06E-149	1035.86	797.17	57701.11	11748.48
ENSRNOT00000021803	Rpl7l1	ENSRNOT00000021803.3	ENSRNOT00000021803.4	0.57	0.66	0.09	-4.21	0.98	-3.23	7.59E-90	60.91	586.46	263.64	115.15
ENSRNOT00000021803	Rpl7l1	ENSRNOT00000021803.3	ENSRNOT00000021803.5	0.90	0.99	0.09	-9.39	6.13	-3.26	9.60E-169	60.91	600.71	263.64	2022-01-01
ENSRNOT00000029593	Rcan2	ENSRNOT00000029593.2	ENSRNOT00000029593.3	0.70	0.85	0.15	-6.03	3.55	-2.48	1.32E-128	508.48	2807.47	198.99	14.14
ENSRNOT00000031866	Tmem237	ENSRNOT00000031866.1	ENSRNOT00000031866.4	0.34	0.99	0.65	-4.53	5.40	0.87	7.13E-33	1998.38	1096.16	208.18	2022-03-03
ENSRNOT00000050557	Kif1a	ENSRNOT00000050557.1	ENSRNOT00000050557.2	0.17	0.83	0.66	-1.41	2.38	0.97	7.33E-18	303.74	155.96	2402-12-01	446.36
ENSRNOT00000072870	LOC501282	ENSRNOT00000072870.1	ENSRNOT00000072870.4	0.37	0.89	0.52	-2.91	2022-02-03	0.12	3.35E-10	828.38	757.78	63.54	2022-08-08
ENSRNOT00000073079	Tbcc	ENSRNOT00000073079.1	ENSRNOT00000073079.2	0.29	0.98	0.69	-3.86	2022-01-05	1.16	3.73E-25	2503.94	1122.83	207.07	2022-05-05
ENSRNOT00000003667	Pbdc1	ENSRNOT00000003667.1	ENSRNOT00000003667.4	0.37	1.00	0.63	-5.41	6.16	0.75	7.18E-28	1220.30	727.27	145.35	0.00
ENSRNOT00000059031	Ctps2	ENSRNOT00000059031.0	ENSRNOT00000059031.4	0.73	0.80	0.07	-5.66	2.00	-3.65	2.28E-49	384.55	4827.37	58.59	16.16
ENSRNOT00000066674	Maoa	ENSRNOT00000066674.0	ENSRNOT00000066674.2	0.54	0.94	0.40	-4.48	3.89	-0.59	2.37E-89	3152.22	4726.57	296.77	18.18
ENSRNOT00000012400	Fermt2	ENSRNOT00000012400.1	ENSRNOT00000012400.2	0.51	0.71	0.20	-3.69	1.66	-2.03	1.32E-86	6131.72	25007.98	246.36	113.03
ENSRNOT00000006329	Napb	ENSRNOT00000006329.3	ENSRNOT00000006329.8	0.28	1.00	0.72	-3.96	5.31	1.35	2.48E-11	125.76	48.18	107.37	0.00
ENSRNOT00000016981	Ywhab	ENSRNOT00000016981.1	ENSRNOT00000016981.3	0.19	0.40	0.21	-1.26	-0.64	-1.90	3.77E-06	2035.96	7585.66	56.06	87.68
ENSRNOT00000068745	Chn1	ENSRNOT00000068745.1	ENSRNOT00000068745.4	0.31	0.99	0.68	-4.29	5.40	2022-12-01	6.01E-26	793.03	363.33	197.88	2022-02-02
ENSRNOT00000013124	Mkrn1	ENSRNOT00000013124.1	ENSRNOT00000013124.5	0.28	0.93	0.65	-3.50	4.38	0.88	3.56E-81	4774.95	2577.88	722.02	38.38
ENSRNOT00000009749	Plin2	ENSRNOT00000009749.0	ENSRNOT00000009749.4	0.18	1.00	0.82	-4.87	2022-05-07	2.18	1.13E-30	3808.38	841.72	394.65	0.91
ENSRNOT00000020722	Pole3	ENSRNOT00000020722.1	ENSRNOT00000020722.2	0.36	0.96	0.60	-3.89	4.45	0.57	2.76E-24	439.39	297.27	210.71	15.15
ENSRNOT00000013695	Eif5	ENSRNOT00000013695.1	ENSRNOT00000013695.4	0.18	0.59	0.41	-1.09	0.56	-0.53	1.76E-92	6597.17	9541.92	1838.89	1165.25
ENSRNOT00000017442	Lix1	ENSRNOT00000017442.0	ENSRNOT00000017442.4	0.41	0.97	0.56	-4.67	2022-02-05	0.35	3.66E-28	1268.18	995.35	130.20	1.92
ENSRNOT00000025794	Sod2	ENSRNOT00000025794.1	ENSRNOT00000025794.6	0.37	0.68	0.31	-2.73	1.57	-1.17	3.38E-199	9324-04-01	21125.66	956.77	372.53
ENSRNOT00000026385	Fam103a1	ENSRNOT00000026385.0	ENSRNOT00000026385.3	0.22	0.99	0.77	-4.46	6.41	1.95	3.00E-51	2251.62	734.75	590.30	2022-09-09
ENSRNOT00000026573	Sptbn2	ENSRNOT00000026573.1	ENSRNOT00000026573.4	0.16	0.95	0.78	-2.75	4.61	1.86	8.79E-08	3591.92	987.47	123.03	2022-05-05
ENSRNOT00000026595	Btbd1	ENSRNOT00000026595.1	ENSRNOT00000026595.3	0.35	0.81	0.47	-3.50	3.31	-0.18	1.55E-86	3346.36	3801.52	498.69	68.69
ENSRNOT00000028703	Cebpg	ENSRNOT00000028703.1	ENSRNOT00000028703.5	0.44	1.00	0.55	-6.42	6.74	0.32	1.54E-88	802.02	644.85	433.64	2022-02-02
ENSRNOT00000065288	Nrip3	ENSRNOT00000065288.1	ENSRNOT00000065288.4	0.35	1.00	0.65	-5.81	6.68	0.87	1.74E-32	460.10	250.61	203.94	0.00
ENSRNOT00000073193	Rrp12	ENSRNOT00000073193.2	ENSRNOT00000073193.6	0.17	0.98	0.81	-1.87	3.94	2022-07-02	5.15E-03	489.39	114.75	41.41	2022-01-01
ENSRNOT00000023628	Hspa4	ENSRNOT00000023628.1	ENSRNOT00000023628.2	0.20	0.35	0.16	-1.39	-1.03	-2.42	1.43E-16	1597.98	8529.80	81.62	118.28
ENSRNOT00000066534	Rbfox1	ENSRNOT00000066534.1	ENSRNOT00000066534.3	0.23	0.88	0.65	-1.87	2.75	0.88	1.12E-17	3692.42	2041.92	257.98	36.77
ENSRNOT00000002222	Wrb	ENSRNOT00000002222.1	ENSRNOT00000002222.3	0.21	0.57	0.36	-1.26	0.44	-0.81	8.70E-21	680.40	1204.75	224.95	130.10
ENSRNOT00000074527	LOC100911356	ENSRNOT00000074527.1	ENSRNOT00000074527.5	0.35	0.66	0.31	-2.79	1.64	-1.15	3.77E-19	358.38	799.39	110.81	50.51
ENSRNOT00000020608	Rufy3	ENSRNOT00000020608.0	ENSRNOT00000020608.4	0.51	0.95	0.44	-4.80	4.45	-0.35	0.00E+00	4877.37	6199.29	1854.75	100.91
ENSRNOT00000020608	Rufy3	ENSRNOT00000020608.0	ENSRNOT00000020608.5	0.32	0.41	0.09	-2.74	-0.53	-3.28	0.00E+00	4877.37	47246.87	1854.75	2716.97
ENSRNOT00000013324	Esd	ENSRNOT00000013324.0	ENSRNOT00000013324.2	0.15	0.99	0.84	-4.26	6.65	2.39	1.26E-18	1184.55	224.75	299.60	2022-01-01
ENSRNOT00000015605	Wbp4	ENSRNOT00000015605.0	ENSRNOT00000015605.2	0.18	0.89	0.71	-2.25	3.51	1.26	4.01E-09	2557.37	1061.72	216.97	31.31
ENSRNOT00000020419	Spryd7	ENSRNOT00000020419.1	ENSRNOT00000020419.5	0.16	0.99	0.84	-4.59	6.93	2.34	2.14E-64	9649.60	1901.62	1066.26	2022-09-09
ENSRNOT00000016995	Vps36	ENSRNOT00000016995.0	ENSRNOT00000016995.5	0.71	0.95	0.25	-5.31	3.70	-1.62	3.56E-38	795.05	2440.00	73.74	2022-04-04
ENSRNOT00000026742	Dph3	ENSRNOT00000026742.2	ENSRNOT00000026742.3	0.32	0.96	0.64	-3.05	3.90	0.85	7.02E-10	697.98	384.95	71.72	2022-03-03
ENSRNOT00000019040	Ssr1	ENSRNOT00000019040.1	ENSRNOT00000019040.3	0.35	0.44	0.08	-3.05	-0.40	-3.46	8.35E-53	823.43	9007.37	156.26	277.27
ENSRNOT00000019040	Ssr1	ENSRNOT00000019040.1	ENSRNOT00000019040.9	0.19	1.00	0.81	-4.12	6.24	2.13	1.02E-12	823.43	187.68	156.26	0.00
ENSRNOT00000023125	LOC306766	ENSRNOT00000023125.2	ENSRNOT00000023125.5	0.16	0.36	0.20	-1.19	-0.82	-2.01	1.07E-10	337.88	1368.69	140.40	248.28
ENSRNOT00000026187	Gata3	ENSRNOT00000026187.2	ENSRNOT00000026187.4	0.34	0.57	0.23	-2.81	2022-06-01	-1.75	2.83E-192	7960.00	26706.46	526.77	153.33
ENSRNOT00000018577	Fgf1	ENSRNOT00000018577.0	ENSRNOT00000018577.3	0.27	1.00	0.73	-4.11	5.51	1.41	3.12E-12	554.14	207.98	94.95	0.00
ENSRNOT00000018577	Fgf1	ENSRNOT00000018577.0	ENSRNOT00000018577.4	0.51	0.85	0.34	-3.58	2.64	-0.94	1.38E-27	554.14	1062.73	94.95	13.94
ENSRNOT00000023886	Pias2	ENSRNOT00000023886.0	ENSRNOT00000023886.2	0.25	0.84	0.59	-2.63	3.15	0.52	8.22E-11	472.83	329.19	93.23	2022-10-10
ENSRNOT00000023886	Pias2	ENSRNOT00000023886.0	ENSRNOT00000023886.3	0.62	0.91	0.29	-4.67	3.36	-1.31	1.36E-39	472.83	1177.98	93.23	2022-06-06
ENSRNOT00000025172	Gnal	ENSRNOT00000025172.2	ENSRNOT00000025172.6	0.52	0.98	0.46	-4.95	4.72	-0.23	2.04E-20	120.81	142.32	78.69	2022-01-01
ENSRNOT00000039377	Riok3	ENSRNOT00000039377.1	ENSRNOT00000039377.4	0.46	0.67	0.22	-2.89	2022-02-01	-1.87	1.51E-73	1787.58	6465.35	251.92	124.04
ENSRNOT00000012240	Sec62	ENSRNOT00000012240.2	ENSRNOT00000012240.6	0.17	1.00	0.83	-4.03	6.32	2.29	1.96E-13	4169.39	845.86	171.62	0.00
ENSRNOT00000018830	Snapin	ENSRNOT00000018830.1	ENSRNOT00000018830.2	0.43	0.84	0.41	-3.65	2022-11-03	-0.54	7.50E-86	1721.21	2500.51	426.06	68.89
ENSRNOT00000074632	Cisd2	ENSRNOT00000074632.1	ENSRNOT00000074632.4	0.64	0.99	0.35	-6.01	2022-08-05	-0.93	2.12E-53	1074.24	2100-10-01	126.26	2022-02-02
ENSRNOT00000007558	Csnk2a1	ENSRNOT00000007558.2	ENSRNOT00000007558.4	0.18	0.98	0.80	-3.47	5.48	2.00	5.08E-34	14792.12	3693.94	477.78	7.98
ENSRNOT00000008279	Cables2	ENSRNOT00000008279.2	ENSRNOT00000008279.3	0.44	0.75	0.31	-2.79	1.62	-1.17	8.75E-07	90.20	207.98	42.42	23.23
ENSRNOT00000011748	Gdap1l1	ENSRNOT00000011748.0	ENSRNOT00000011748.3	0.35	0.94	0.59	-3.51	2022-01-04	0.51	6.42E-39	943.64	661.92	298.79	20.20
ENSRNOT00000022073	Tcea2	ENSRNOT00000022073.0	ENSRNOT00000022073.2	0.49	1.00	0.51	-6.41	6.44	0.04	6.68E-48	644.95	637.68	177.37	0.00
ENSRNOT00000024310	Ahcy	ENSRNOT00000024310.1	ENSRNOT00000024310.4	0.22	0.57	0.35	-1.32	0.43	-0.89	2.01E-16	2025.66	3732.93	145.45	84.75
ENSRNOT00000067085	Cd59	ENSRNOT00000067085.1	ENSRNOT00000067085.6	0.65	0.93	0.28	-4.35	3.00	-1.35	3.32E-18	781.11	2007.27	39.70	2022-03-03
ENSRNOT00000019713	Tgoln2	ENSRNOT00000019713.1	ENSRNOT00000019713.8	0.16	0.59	0.44	-1.25	0.88	-0.37	1.16E-15	582.53	757.47	151.52	54.44
ENSRNOT00000035362	Ypel5	ENSRNOT00000035362.1	ENSRNOT00000035362.2	0.41	0.93	0.52	-5.90	2022-02-06	0.13	0.00E+00	6802.83	6232.32	2279.19	17.17
ENSRNOT00000041354	Atp2b1	ENSRNOT00000041354.0	ENSRNOT00000041354.3	0.29	0.45	0.16	-1.96	-0.45	-2.40	6.04E-33	1569.39	8298.18	211.62	347.27
ENSRNOT00000045964	R3hdm2	ENSRNOT00000045964.1	ENSRNOT00000045964.3	0.26	0.86	0.60	-1.78	2.37	0.59	7.87E-04	223.94	148.28	57.58	13.13
ENSRNOT00000008062	Aasdhppt	ENSRNOT00000008062.0	ENSRNOT00000008062.3	0.30	0.69	0.39	-2.33	1.66	-0.67	1.58E-17	2520-10-01	4004.95	308.59	222.93
ENSRNOT00000030221	AABR06055804.1	ENSRNOT00000030221.0	ENSRNOT00000030221.7	0.42	0.85	0.44	-4.05	3.69	-0.36	1.28E-115	2115.45	2699.39	817.88	171.11
ENSRNOT00000044174	Dync2h1	ENSRNOT00000044174.1	ENSRNOT00000044174.3	0.20	0.98	0.78	-2.56	4.36	1.80	5.41E-05	528.48	150.10	56.57	2022-01-01
ENSRNOT00000045087	Atp2c1	ENSRNOT00000045087.1	ENSRNOT00000045087.4	0.17	0.89	0.71	-1.63	2.95	1.32	2.75E-16	26762.63	10641.31	381.52	50.20
ENSRNOT00000005073	Col5a2	ENSRNOT00000005073.0	ENSRNOT00000005073.5	0.19	0.73	0.54	-1.33	1.58	0.25	2.65E-24	819.19	686.97	592.32	184.55
ENSRNOT00000000177	Lamp2	ENSRNOT00000000177.0	ENSRNOT00000000177.7	0.25	0.88	0.64	-2.11	2.93	0.82	2.51E-81	12838.28	7269.70	1239.39	181.52
ENSRNOT00000045285	Map7d2	ENSRNOT00000045285.1	ENSRNOT00000045285.4	0.17	0.26	0.09	-1.85	-1.46	-3.31	1.56E-22	1265.25	12499.09	105.86	289.49
ENSRNOT00000066674	Maoa	ENSRNOT00000066674.0	ENSRNOT00000066674.3	0.45	0.74	0.29	-3.67	2.35	-1.32	5.30E-74	3152.22	7843-03-01	296.77	104.55
ENSRNOT00000075200	LOC257642	ENSRNOT00000075200.4	ENSRNOT00000075200.7	0.19	0.78	0.59	-1.23	1.76	0.53	1.11E-03	2102.42	1418.38	56.87	14.85
ENSRNOT00000042768	Kif1b	ENSRNOT00000042768.1	ENSRNOT00000042768.3	0.46	0.55	0.09	-3.60	0.27	-3.33	3.79E-18	50.81	518.48	40.91	35.96
ENSRNOT00000050562	Mrpl17	ENSRNOT00000050562.1	ENSRNOT00000050562.3	0.16	1.00	0.84	-3.39	5.83	2.44	1.98E-08	3398.69	624.55	116.06	0.00
ENSRNOT00000003514	Carhsp1	ENSRNOT00000003514.1	ENSRNOT00000003514.4	0.19	0.99	0.80	-4.23	6.20	1.97	6.04E-28	1662.83	421.21	426.06	2022-07-07
ENSRNOT00000004290	Timp2	ENSRNOT00000004290.1	ENSRNOT00000004290.3	0.24	0.35	0.11	-2.09	-0.90	-2.98	4.71E-07	649.39	5060.61	35.15	86.46
ENSRNOT00000027957	G6PC	ENSRNOT00000027957.1	ENSRNOT00000027957.2	0.20	0.99	0.79	-3.74	5.62	1.88	1.59E-22	2066.57	558.89	290.40	3.94
ENSRNOT00000048490	Ddx5	ENSRNOT00000048490.0	ENSRNOT00000048490.2	0.15	0.98	0.83	-3.21	5.45	2.24	2.91E-24	17967.78	3812.53	410.10	6.77
ENSRNOT00000059496	Cyfip2	ENSRNOT00000059496.1	ENSRNOT00000059496.5	0.33	0.99	0.66	-3.49	4.45	0.96	5.12E-11	855.76	444.24	70.61	0.91
ENSRNOT00000073321	Fasn	ENSRNOT00000073321.1	ENSRNOT00000073321.3	0.17	0.51	0.34	-1.06	0.11	-0.95	9.18E-11	2160.20	4183.23	105.96	73.74
ENSRNOT00000002222	Wrb	ENSRNOT00000002222.1	ENSRNOT00000002222.4	0.66	0.82	0.16	-4.51	2022-08-02	-2.43	2.55E-110	680.40	3689.70	224.95	63.43
ENSRNOT00000039997	Pcnp	ENSRNOT00000039997.2	ENSRNOT00000039997.5	0.20	0.35	0.15	-1.48	-1.00	-2.48	9.41E-31	726.87	4071.92	260.30	510.40
ENSRNOT00000043004	Pbx1	ENSRNOT00000043004.2	ENSRNOT00000043004.3	0.85	0.95	0.10	-7.68	4.49	-3.19	1.17E-136	194.95	1783.23	166.67	4.95
ENSRNOT00000008030	Nsg1	ENSRNOT00000008030.1	ENSRNOT00000008030.4	0.22	0.31	0.09	-2.08	-1.19	-3.27	5.92E-170	4088.69	39696.46	722.93	1634.55
ENSRNOT00000014821	Gch1	ENSRNOT00000014821.0	ENSRNOT00000014821.2	0.38	0.96	0.59	-3.73	4.23	0.50	5.00E-36	1444.75	1017.37	198.89	4.95
ENSRNOT00000014821	Gch1	ENSRNOT00000014821.0	ENSRNOT00000014821.3	0.39	0.57	0.17	-3.37	2022-12-01	-2.25	1.02E-74	1444.75	6844-04-01	198.89	96.87
ENSRNOT00000045882	Pcdh17	ENSRNOT00000045882.1	ENSRNOT00000045882.5	0.38	0.82	0.44	-2.24	1.89	-0.34	3.94E-05	5266.57	6788.79	26.26	6.36
ENSRNOT00000071133	Gng2	ENSRNOT00000071133.2	ENSRNOT00000071133.4	0.54	0.98	0.44	-6.19	5.84	-0.34	0.00E+00	5886.36	7550.20	1226.57	20.20
ENSRNOT00000021073	Tpm4	ENSRNOT00000021073.2	ENSRNOT00000021073.3	0.17	0.47	0.30	-1.04	-0.15	-1.19	4.21E-23	1306.57	2987.68	481.11	535.35
ENSRNOT00000022389	Idi1	ENSRNOT00000022389.0	ENSRNOT00000022389.2	0.29	0.97	0.68	-3.57	4.64	2022-07-01	4.88E-118	11095.56	5220.61	969.19	26.16
ENSRNOT00000024781	Isca1	ENSRNOT00000024781.1	ENSRNOT00000024781.3	0.55	0.99	0.44	-6.65	6.33	-0.33	1.88E-226	1835.15	2298.99	792.73	2022-09-09
ENSRNOT00000046718	Thoc1	ENSRNOT00000046718.0	ENSRNOT00000046718.2	0.38	0.98	0.60	-3.94	4.52	0.57	1.52E-18	548.69	375.15	94.75	1.31
ENSRNOT00000030399	Afg3l1	ENSRNOT00000030399.0	ENSRNOT00000030399.2	0.37	0.98	0.61	-4.59	5.21	0.62	8.02E-25	739.09	480.20	146.36	2022-03-03
ENSRNOT00000046155	Tcf25	ENSRNOT00000046155.0	ENSRNOT00000046155.2	0.33	0.94	0.61	-2.43	2022-07-03	0.64	6.84E-05	492.93	316.67	32.32	2022-02-02
ENSRNOT00000051594	Znrf2	ENSRNOT00000051594.2	ENSRNOT00000051594.3	0.19	0.39	0.20	-1.22	-0.81	-2.02	1.02E-42	2141-11-01	8809.70	221.92	225.56
ENSRNOT00000019225	Kif2a	ENSRNOT00000019225.0	ENSRNOT00000019225.3	0.30	0.92	0.63	-3.48	4.24	0.76	2.11E-83	13937.58	8216.26	610.10	28.28
ENSRNOT00000028389	Snx27	ENSRNOT00000028389.1	ENSRNOT00000028389.5	0.44	0.73	0.29	-4.18	2.93	-1.26	1.47E-17	140.10	335.76	108.69	49.49
ENSRNOT00000006341	Kif5c	ENSRNOT00000006341.2	ENSRNOT00000006341.5	0.39	0.59	0.21	-2.55	0.62	-1.93	9.00E-292	513.13	1953.74	4362.32	2590.00
ENSRNOT00000011748	Gdap1l1	ENSRNOT00000011748.0	ENSRNOT00000011748.4	0.39	0.96	0.57	-4.05	4.47	0.42	2.56E-48	943.64	702.02	298.79	2022-12-12
ENSRNOT00000011846	Mtch2	ENSRNOT00000011846.1	ENSRNOT00000011846.2	0.17	0.98	0.81	-4.37	6.50	2.13	4.03E-240	40351.72	9205.66	3898.59	63.54
ENSRNOT00000016220	Mapre1	ENSRNOT00000016220.1	ENSRNOT00000016220.6	0.26	0.99	0.74	-5.12	6.61	1.48	5.01E-59	6693.43	2417.58	501.92	2022-03-03
ENSRNOT00000051064	Cdc25b	ENSRNOT00000051064.1	ENSRNOT00000051064.2	0.58	0.93	0.35	-4.47	3.58	-0.89	9.41E-84	1716.26	3189.90	250.30	19.19
ENSRNOT00000012021	Mrpl35	ENSRNOT00000012021.1	ENSRNOT00000012021.2	0.35	0.99	0.64	-5.49	6.35	0.86	3.67E-118	4107.68	2279.90	737.78	2022-07-07
ENSRNOT00000044446	H2afj	ENSRNOT00000044446.0	ENSRNOT00000044446.3	0.26	1.00	0.74	-4.34	5.93	1.58	2.99E-14	526.77	171.52	128.99	0.00
ENSRNOT00000075400	Gng12	ENSRNOT00000075400.2	ENSRNOT00000075400.4	0.54	0.86	0.33	-4.97	3.92	-1.05	1.07E-242	1863.84	3845.56	763.43	70.61
ENSRNOT00000055562	Ctnnbip1	ENSRNOT00000055562.1	ENSRNOT00000055562.3	0.26	0.98	0.72	-4.81	6.18	1.38	7.73E-176	2727-07-01	1056.57	1942-12-01	25.25
ENSRNOT00000010753	Psma3	ENSRNOT00000010753.1	ENSRNOT00000010753.2	0.28	0.93	0.65	-3.90	4.81	0.91	6.55E-45	6124.65	3254.85	340.40	2022-12-12
ENSRNOT00000038448	Srsf7	ENSRNOT00000038448.0	ENSRNOT00000038448.2	0.42	0.89	0.47	-3.48	3.32	-0.16	1.44E-31	3091.41	3445.45	137.37	10.00
ENSRNOT00000064679	Calm2	ENSRNOT00000064679.1	ENSRNOT00000064679.4	0.28	0.85	0.58	-2.91	3.36	0.45	9.13E-121	12234.34	8937.17	809.39	55.05
ENSRNOT00000005491	Atp2b1	ENSRNOT00000005491.0	ENSRNOT00000005491.6	0.36	0.89	0.53	-3.20	3.39	0.19	1.26E-23	1569.39	1421.21	211.62	40.40
ENSRNOT00000041354	Atp2b1	ENSRNOT00000041354.0	ENSRNOT00000041354.6	0.36	0.89	0.53	-3.20	3.39	0.19	1.26E-23	1569.39	1421.21	211.62	40.40
ENSRNOT00000007843	RGD1311744	ENSRNOT00000007843.2	ENSRNOT00000007843.3	0.16	0.74	0.58	-1.07	1.51	0.44	4.38E-27	15696.77	11522.02	838.99	300.51
ENSRNOT00000012219	Rab6b	ENSRNOT00000012219.1	ENSRNOT00000012219.6	0.56	0.96	0.40	-4.84	4.26	-0.58	3.35E-26	828.59	1183.13	84.85	2022-04-04
ENSRNOT00000012219	Rab6b	ENSRNOT00000012219.1	ENSRNOT00000012219.7	0.39	0.60	0.20	-2.58	0.54	-2.03	1.26E-22	828.59	3239.49	84.85	58.28
ENSRNOT00000041548	Rbms3	ENSRNOT00000041548.2	ENSRNOT00000041548.3	0.35	0.39	0.04	-3.88	-0.67	-4.55	1.16E-167	185.15	4452.32	378.08	636.77
ENSRNOT00000041548	Rbms3	ENSRNOT00000041548.2	ENSRNOT00000041548.5	0.56	1.00	0.44	-7.91	7.56	-0.35	5.10E-84	185.15	235.05	378.08	0.00
ENSRNOT00000041548	Rbms3	ENSRNOT00000041548.2	ENSRNOT00000041548.6	0.73	0.91	0.18	-5.45	3.23	-2.22	1.92E-156	185.15	864.04	378.08	38.18
ENSRNOT00000052392	Cadm1	ENSRNOT00000052392.2	ENSRNOT00000052392.4	0.66	0.86	0.20	-5.78	3.74	-2.04	0.00E+00	2597.78	10775.15	2211.62	303.64
ENSRNOT00000064114	Higd1a	ENSRNOT00000064114.1	ENSRNOT00000064114.2	0.53	0.74	0.21	-3.55	1.62	-1.93	5.62E-25	2470-10-01	9458-08-01	68.69	29.29
ENSRNOT00000018293	Lancl1	ENSRNOT00000018293.1	ENSRNOT00000018293.2	0.49	0.98	0.49	-4.02	3.97	-0.05	1.97E-15	1504.34	1562.12	58.59	1.92
ENSRNOT00000059031	Ctps2	ENSRNOT00000059031.0	ENSRNOT00000059031.2	0.31	0.61	0.30	-1.82	0.63	-1.19	8.20E-09	384.55	872.93	58.59	37.27
ENSRNOT00000061455	Ube2a	ENSRNOT00000061455.1	ENSRNOT00000061455.2	0.30	0.54	0.24	-2.55	0.89	-1.66	4.87E-34	1461.72	4593.43	154.65	95.86
ENSRNOT00000006856	Mapt	ENSRNOT00000006856.2	ENSRNOT00000006856.3	0.31	0.97	0.66	-4.01	4.96	0.94	3.60E-80	11242.42	5866.87	598.48	17.98
ENSRNOT00000030765	Hand2	ENSRNOT00000030765.2	ENSRNOT00000030765.3	0.26	0.31	0.05	-3.15	-1.16	-4.31	3.65E-98	1664.34	32262.12	206.87	462.42
ENSRNOT00000046053	AABR06087686.1	ENSRNOT00000046053.1	ENSRNOT00000046053.3	0.29	0.79	0.50	-1.88	1.89	0.02	4.41E-47	4850.00	4800.30	554.44	158.69
ENSRNOT00000056151	Serf2	ENSRNOT00000056151.0	ENSRNOT00000056151.4	0.37	0.73	0.35	-2.40	1.53	-0.88	1.41E-50	1325.25	2375.66	322.93	117.07
ENSRNOT00000040440	Zc3h14	ENSRNOT00000040440.1	ENSRNOT00000040440.2	0.29	0.94	0.65	-3.35	4.21	0.86	4.58E-30	4007.17	2205.35	241.21	2022-12-12
ENSRNOT00000022796	Bace1	ENSRNOT00000022796.2	ENSRNOT00000022796.5	0.59	0.91	0.32	-3.93	2.83	-1.09	7.32E-21	1386.26	2971-11-01	58.28	6.57
ENSRNOT00000020536	Mob4	ENSRNOT00000020536.1	ENSRNOT00000020536.3	0.36	0.70	0.34	-2.16	1.22	-0.94	7.34E-29	3511.41	6769.70	176.26	76.67
ENSRNOT00000076699	Yipf6	ENSRNOT00000076699.1	ENSRNOT00000076699.5	0.20	0.58	0.39	-1.31	0.65	-0.66	3.41E-69	1673.13	2634.55	423.33	114.95
ENSRNOT00000000253	Zfp207	ENSRNOT00000000253.0	ENSRNOT00000000253.9	0.18	0.99	0.81	-3.70	5.84	2.14	2.59E-12	3051.72	692.22	160.40	2022-01-01
ENSRNOT00000068345	Naa50	ENSRNOT00000068345.1	ENSRNOT00000068345.6	0.39	0.54	0.15	-2.84	0.33	-2.50	4.80E-115	807.07	4581-01-01	334.95	215.45
ENSRNOT00000016995	Vps36	ENSRNOT00000016995.0	ENSRNOT00000016995.3	0.38	1.00	0.62	-4.51	5.20	0.69	6.70E-15	795.05	489.90	73.74	0.00
ENSRNOT00000016995	Vps36	ENSRNOT00000016995.0	ENSRNOT00000016995.4	0.68	0.96	0.29	-5.22	3.90	-1.32	1.26E-34	795.05	1984.34	73.74	2022-03-03
ENSRNOT00000005656	Dhps	ENSRNOT00000005656.0	ENSRNOT00000005656.5	0.15	1.00	0.85	-3.85	6.32	2.47	2.96E-12	1451.11	259.19	182.53	0.00
ENSRNOT00000057138	Mto1	ENSRNOT00000057138.2	ENSRNOT00000057138.4	0.42	1.00	0.58	-8.26	8.87	0.62	8.09E-205	734.24	730.20	976.97	0.00
ENSRNOT00000057138	Mto1	ENSRNOT00000057138.2	ENSRNOT00000057138.6	0.89	0.99	0.10	-9.61	6.37	-3.23	0.00E+00	734.24	7018.18	976.97	11.41
ENSRNOT00000025955	Taf10	ENSRNOT00000025955.0	ENSRNOT00000025955.5	0.23	1.00	0.77	-3.23	4.99	1.76	1.41E-06	327.07	95.25	62.32	0.00
ENSRNOT00000028195	Dhcr7	ENSRNOT00000028195.0	ENSRNOT00000028195.2	0.29	0.98	0.69	-3.44	4.58	1.14	8.73E-10	1051.62	476.97	69.70	2022-01-01
ENSRNOT00000036303	AABR06002662.1	ENSRNOT00000036303.0	ENSRNOT00000036303.3	0.30	1.00	0.70	-4.31	5.51	1.20	1.58E-12	252.63	109.80	90.91	0.00
ENSRNOT00000036303	AABR06002662.1	ENSRNOT00000036303.0	ENSRNOT00000036303.5	0.74	0.97	0.23	-5.94	4.21	-1.74	1.16E-48	252.63	858.99	90.91	2022-03-03
ENSRNOT00000056024	Svip	ENSRNOT00000056024.2	ENSRNOT00000056024.3	0.38	0.73	0.35	-2.71	1.83	-0.88	2.14E-81	1646.46	3038-08-01	641.31	281.72
ENSRNOT00000058943	LOC100362069	ENSRNOT00000058943.0	ENSRNOT00000058943.5	0.25	1.00	0.75	-4.98	6.57	1.59	3.45E-25	489.09	159.60	268.69	2022-01-01
ENSRNOT00000065288	Nrip3	ENSRNOT00000065288.1	ENSRNOT00000065288.7	0.45	0.94	0.50	-4.84	4.82	-0.02	4.32E-39	460.10	469.09	203.94	2022-12-12
ENSRNOT00000065288	Nrip3	ENSRNOT00000065288.1	ENSRNOT00000065288.8	0.17	0.97	0.80	-3.40	5.38	1.98	2.75E-11	460.10	115.56	203.94	2022-05-05
ENSRNOT00000065288	Nrip3	ENSRNOT00000065288.1	ENSRNOT00000065288.10	0.18	1.00	0.81	-4.06	6.17	2022-11-02	5.21E-14	460.10	105.96	203.94	2022-01-01
ENSRNOT00000068501	Nipa1	ENSRNOT00000068501.1	ENSRNOT00000068501.7	0.50	0.84	0.34	-3.30	2.35	-0.95	2.09E-96	2387.98	4590.51	335.15	49.29
ENSRNOT00000071028	LOC681193	ENSRNOT00000071028.2	ENSRNOT00000071028.3	0.24	1.00	0.76	-5.58	7.19	1.61	4.49E-29	314.55	101.82	339.90	0.00
ENSRNOT00000004202	Fopnl	ENSRNOT00000004202.1	ENSRNOT00000004202.5	0.25	0.97	0.72	-3.06	4.42	1.36	6.72E-12	413.94	160.91	113.13	2022-02-02
ENSRNOT00000018394	Polg2	ENSRNOT00000018394.0	ENSRNOT00000018394.2	0.27	1.00	0.73	-3.13	4.53	1.40	5.53E-06	137.98	51.11	48.48	0.00
ENSRNOT00000019919	Med31	ENSRNOT00000019919.0	ENSRNOT00000019919.5	0.18	1.00	0.82	-3.98	6.13	2.16	1.91E-12	1065.76	235.86	153.43	0.00
ENSRNOT00000054955	Alyref	ENSRNOT00000054955.1	ENSRNOT00000054955.6	0.64	0.92	0.28	-4.30	2.94	-1.36	1.05E-29	525.35	1339.90	71.52	2022-07-07
ENSRNOT00000067317	Fbxl20	ENSRNOT00000067317.5	ENSRNOT00000067317.7	0.34	1.00	0.65	-5.10	2022-02-06	0.91	1.02E-68	2457.58	1307.37	444.44	3.94
ENSRNOT00000073317	Nhp2	ENSRNOT00000073317.0	ENSRNOT00000073317.3	0.57	0.99	0.41	-6.42	5.92	-0.50	6.04E-107	1172.83	1638.89	325.56	2022-03-03
ENSRNOT00000035611	Kpna1	ENSRNOT00000035611.1	ENSRNOT00000035611.5	0.15	1.00	0.85	-1.87	4.34	2.47	5.66E-03	458.28	81.72	38.48	0.00
ENSRNOT00000043365	Pigx	ENSRNOT00000043365.0	ENSRNOT00000043365.4	0.84	0.96	0.12	-7.58	4.72	-2.87	1.35E-74	83.84	623.03	104.04	2022-02-02
ENSRNOT00000043365	Pigx	ENSRNOT00000043365.0	ENSRNOT00000043365.5	0.64	0.98	0.34	-5.93	2022-01-05	-0.92	3.60E-34	83.84	161.82	104.04	2022-01-01
ENSRNOT00000001417	Rac1	ENSRNOT00000001417.0	ENSRNOT00000001417.3	0.22	0.33	0.11	-1.89	-1.15	-3.04	2.78E-18	2109-09-01	17283.03	118.99	340.10
ENSRNOT00000005677	Soat1	ENSRNOT00000005677.2	ENSRNOT00000005677.5	0.40	0.89	0.49	-2.85	2.77	-0.08	4.63E-36	2124.24	2269.49	174.55	15.15
ENSRNOT00000006154	Cox20	ENSRNOT00000006154.1	ENSRNOT00000006154.7	0.23	1.00	0.77	-5.20	6.93	1.73	5.88E-58	2650.51	797.78	616.46	3.43
ENSRNOT00000017784	Kif26b	ENSRNOT00000017784.0	ENSRNOT00000017784.2	0.16	0.95	0.79	-4.35	6.28	1.92	8.82E-72	1543.84	406.26	1888.59	57.58
ENSRNOT00000017784	Kif26b	ENSRNOT00000017784.0	ENSRNOT00000017784.5	0.44	0.55	0.12	-3.24	0.30	-2.94	0.00E+00	1543.84	11873.84	1888.59	1381.82
ENSRNOT00000012665	Lrpap1	ENSRNOT00000012665.2	ENSRNOT00000012665.5	0.18	0.42	0.24	-1.15	-0.53	-1.68	6.01E-12	3807.68	12245.25	155.56	233.33
ENSRNOT00000067393	Asb3	ENSRNOT00000067393.2	ENSRNOT00000067393.4	0.30	0.96	0.66	-4.52	5.52	1.00	4.42E-31	648.38	291.21	350.20	13.13
ENSRNOT00000012530	Dnajc15	ENSRNOT00000012530.0	ENSRNOT00000012530.3	0.73	0.98	0.25	-7.04	5.44	-1.60	6.38E-209	650.71	1922.93	429.80	2022-05-05
ENSRNOT00000012530	Dnajc15	ENSRNOT00000012530.0	ENSRNOT00000012530.5	0.39	1.00	0.61	-6.08	6.74	0.66	3.05E-69	650.71	399.60	429.80	2022-01-01
ENSRNOT00000020419	Spryd7	ENSRNOT00000020419.1	ENSRNOT00000020419.8	0.16	0.99	0.83	-4.34	6.63	2.29	1.27E-67	9649.60	1991.92	1066.26	8.89
ENSRNOT00000033977	Ap1g2	ENSRNOT00000033977.1	ENSRNOT00000033977.3	0.30	1.00	0.70	-3.24	4.48	1.24	1.09E-06	319.39	140.91	42.83	0.00
ENSRNOT00000033977	Ap1g2	ENSRNOT00000033977.1	ENSRNOT00000033977.4	0.20	1.00	0.80	-2.52	4.48	1.96	2.46E-04	319.39	82.42	42.83	0.00
ENSRNOT00000018413	Appl1	ENSRNOT00000018413.1	ENSRNOT00000018413.3	0.26	0.80	0.54	-2.57	2.81	0.24	4.46E-19	3917.47	3358.79	249.39	65.66
ENSRNOT00000018413	Appl1	ENSRNOT00000018413.1	ENSRNOT00000018413.9	0.27	1.00	0.73	-5.03	6.46	1.43	2.25E-32	3917.47	1527.58	249.39	2022-01-01
ENSRNOT00000020721	Lsm1	ENSRNOT00000020721.0	ENSRNOT00000020721.6	0.18	1.00	0.82	-4.73	6.94	2.21	6.93E-21	990.40	214.95	276.67	0.00
ENSRNOT00000026039	Polb	ENSRNOT00000026039.1	ENSRNOT00000026039.4	0.56	1.00	0.44	-6.31	5.95	-0.37	1.77E-39	291.52	376.67	126.26	0.00
ENSRNOT00000043384	Mcph1	ENSRNOT00000043384.2	ENSRNOT00000043384.8	0.41	0.85	0.43	-3.81	3.43	-0.38	2.87E-12	63.33	82.83	71.62	7.98
ENSRNOT00000023886	Pias2	ENSRNOT00000023886.0	ENSRNOT00000023886.7	0.22	0.97	0.75	-2.69	4.32	1.63	2.00E-08	472.83	156.16	93.23	2022-02-02
ENSRNOT00000058216	Spata33	ENSRNOT00000058216.0	ENSRNOT00000058216.5	0.31	1.00	0.69	-3.79	4.90	2022-11-01	1.93E-08	139.70	63.84	59.49	0.00
ENSRNOT00000015864	Mrpl47	ENSRNOT00000015864.1	ENSRNOT00000015864.5	0.19	0.97	0.77	-2.56	4.33	1.77	1.06E-07	1075.76	311.21	112.73	2022-04-04
ENSRNOT00000044847	E2f5	ENSRNOT00000044847.1	ENSRNOT00000044847.4	0.22	0.40	0.18	-1.60	-0.62	-2.21	4.84E-14	277.88	1291.62	142.12	246.77
ENSRNOT00000066004	Dclk2	ENSRNOT00000066004.1	ENSRNOT00000066004.5	0.16	1.00	0.84	-3.09	5.52	2.43	1.41E-06	994.65	183.74	91.92	0.00
ENSRNOT00000000553	Pfdn6	ENSRNOT00000000553.0	ENSRNOT00000000553.3	0.22	1.00	0.78	-2.77	4.57	1.80	1.92E-05	346.36	98.59	50.51	0.00
ENSRNOT00000031472	Chchd10	ENSRNOT00000031472.0	ENSRNOT00000031472.2	0.27	1.00	0.73	-4.97	6.44	1.47	3.78E-21	1107.37	394.24	171.52	0.00
ENSRNOT00000009797	Apip	ENSRNOT00000009797.0	ENSRNOT00000009797.4	0.51	0.96	0.45	-4.01	3.71	-0.29	1.61E-12	455.56	566.46	44.24	2022-02-02
ENSRNOT00000009797	Apip	ENSRNOT00000009797.0	ENSRNOT00000009797.6	0.49	0.98	0.49	-4.06	2022-01-04	-0.05	4.43E-12	455.56	482.12	44.24	2022-01-01
ENSRNOT00000010270	Zmynd19	ENSRNOT00000010270.1	ENSRNOT00000010270.5	0.32	0.99	0.66	-4.70	5.67	0.97	5.13E-27	619.39	317.68	178.59	2022-01-01
ENSRNOT00000015843	Blvra	ENSRNOT00000015843.0	ENSRNOT00000015843.5	0.19	0.97	0.78	-2.63	4.49	1.86	8.22E-07	942.63	255.96	77.68	2022-01-01
ENSRNOT00000024942	Chchd5	ENSRNOT00000024942.0	ENSRNOT00000024942.7	0.21	1.00	0.79	-3.86	5.73	1.87	1.26E-10	224.24	60.20	129.19	0.00
ENSRNOT00000024942	Chchd5	ENSRNOT00000024942.0	ENSRNOT00000024942.8	0.65	1.00	0.35	-6.15	5.23	-0.92	3.82E-49	224.24	427.78	129.19	2022-01-01
ENSRNOT00000011052	Cdk5	ENSRNOT00000011052.0	ENSRNOT00000011052.3	0.32	0.79	0.48	-2.46	2.32	-0.14	1.80E-14	902.93	990.61	97.88	19.19
ENSRNOT00000038964	Tatdn2	ENSRNOT00000038964.0	ENSRNOT00000038964.6	0.42	0.96	0.55	-3.87	4.14	0.26	1.11E-20	1745.56	1455.35	100.81	3.84
ENSRNOT00000017479	Nkain3	ENSRNOT00000017479.1	ENSRNOT00000017479.9	0.34	0.98	0.65	-5.25	2022-12-06	0.86	7.56E-48	1300.20	714.04	317.07	2022-04-04
ENSRNOT00000021937	Zfp593	ENSRNOT00000021937.1	ENSRNOT00000021937.5	0.15	1.00	0.85	-3.24	5.71	2.47	5.19E-07	859.19	153.64	102.73	0.00
ENSRNOT00000050137	Mmp16	ENSRNOT00000050137.0	ENSRNOT00000050137.7	0.63	0.83	0.19	-4.95	2.89	-2.06	9.77E-125	820.40	3442.83	261.31	44.34
ENSRNOT00000050137	Mmp16	ENSRNOT00000050137.0	ENSRNOT00000050137.8	0.40	0.93	0.53	-4.40	4.59	0.19	4.65E-47	820.40	719.80	261.31	13.13
ENSRNOT00000006942	Ptprn2	ENSRNOT00000006942.1	ENSRNOT00000006942.5	0.19	0.94	0.75	-2.45	2022-05-04	1.60	3.11E-06	1712.83	559.49	68.48	1.92
ENSRNOT00000061786	Eif3h	ENSRNOT00000061786.2	ENSRNOT00000061786.3	0.39	0.97	0.59	-3.67	4.18	0.51	3.66E-10	402.02	284.95	51.41	2022-01-01
ENSRNOT00000005491	Atp2b1	ENSRNOT00000005491.0	ENSRNOT00000005491.7	0.26	0.82	0.56	-2.21	2.55	0.34	5.41E-09	1569.39	1246.06	211.62	74.95
ENSRNOT00000010720	Cand1	ENSRNOT00000010720.0	ENSRNOT00000010720.8	0.25	0.94	0.69	-2.78	3.95	1.17	1.42E-52	9625.76	4276.97	658.18	47.47
ENSRNOT00000041325	Atcay	ENSRNOT00000041325.1	ENSRNOT00000041325.5	0.28	0.46	0.18	-1.94	-0.28	-2.22	5.93E-04	299.39	1393.84	2022-12-22	35.35
ENSRNOT00000041354	Atp2b1	ENSRNOT00000041354.0	ENSRNOT00000041354.8	0.26	0.82	0.56	-2.21	2.55	0.34	5.41E-09	1569.39	1246.06	211.62	74.95
ENSRNOT00000008062	Aasdhppt	ENSRNOT00000008062.0	ENSRNOT00000008062.6	0.32	0.98	0.65	-4.14	2022-06-05	0.92	3.16E-42	2520-10-01	1326.77	308.59	2022-08-08
ENSRNOT00000014605	Taf1d	ENSRNOT00000014605.0	ENSRNOT00000014605.4	0.35	0.76	0.42	-2.55	2022-05-02	-0.50	2.14E-10	273.54	395.45	285.15	184.85
ENSRNOT00000022676	Nop58	ENSRNOT00000022676.0	ENSRNOT00000022676.7	0.19	0.98	0.79	-3.33	5.20	1.87	4.55E-11	3051.82	828.08	146.36	2022-03-03
ENSRNOT00000026753	Resp18	ENSRNOT00000026753.0	ENSRNOT00000026753.2	0.15	0.99	0.84	-2.82	5.20	2.37	2.58E-06	1209.90	231.11	102.83	2022-01-01
ENSRNOT00000030761	Rpl37a	ENSRNOT00000030761.0	ENSRNOT00000030761.3	0.59	1.00	0.41	-12.11	11.58	-0.53	0.00E+00	936.97	1355.86	6793.64	0.00
ENSRNOT00000040461	Coq10b	ENSRNOT00000040461.1	ENSRNOT00000040461.6	0.29	0.88	0.59	-3.30	3.85	0.55	3.25E-21	1421.62	973.74	216.16	27.68
ENSRNOT00000007015	Ebp	ENSRNOT00000007015.0	ENSRNOT00000007015.5	0.22	1.00	0.78	-6.04	7.87	1.83	4.67E-78	2277.17	630.10	935.86	2022-03-03
ENSRNOT00000054980	Tgfb1i1	ENSRNOT00000054980.1	ENSRNOT00000054980.5	0.19	0.97	0.78	-3.91	5.69	1.78	5.29E-38	1991.41	576.57	545.35	2022-12-12
ENSRNOT00000003087	Slain2	ENSRNOT00000003087.1	ENSRNOT00000003087.4	0.57	0.88	0.32	-5.68	4.56	-1.12	3.56E-83	573.13	1251.41	204.75	2022-06-06
ENSRNOT00000009649	Psmc6	ENSRNOT00000009649.2	ENSRNOT00000009649.8	0.23	0.94	0.71	-4.07	5.37	1.30	5.38E-68	16895.56	6791-11-01	590.81	2022-11-11
ENSRNOT00000016220	Mapre1	ENSRNOT00000016220.1	ENSRNOT00000016220.8	0.30	0.99	0.69	-4.66	5.81	1.15	1.67E-66	6693.43	3018.28	501.92	2022-07-07
ENSRNOT00000019713	Tgoln2	ENSRNOT00000019713.1	ENSRNOT00000019713.10	0.19	1.00	0.81	-3.49	5.60	2022-11-02	2.63E-12	582.53	134.24	151.52	0.00
ENSRNOT00000073039	Chl1	ENSRNOT00000073039.2	ENSRNOT00000073039.5	0.22	0.86	0.64	-1.47	2.31	0.84	3.50E-04	3729.39	2081-01-01	48.48	6.87
ENSRNOT00000047356	Morn2	ENSRNOT00000047356.0	ENSRNOT00000047356.4	0.49	1.00	0.50	-6.40	6.43	0.02	6.39E-47	176.57	170.00	243.43	2022-01-01
ENSRNOT00000070909	Tatdn1	ENSRNOT00000070909.2	ENSRNOT00000070909.5	0.39	1.00	0.61	-5.88	6.56	0.68	4.63E-39	740.30	478.48	202.22	0.00
ENSRNOT00000021068	Otud7a	ENSRNOT00000021068.2	ENSRNOT00000021068.8	0.17	1.00	0.83	-4.03	6.31	2.28	2.91E-13	1660.10	339.29	173.64	0.00
ENSRNOT00000068501	Nipa1	ENSRNOT00000068501.1	ENSRNOT00000068501.4	0.56	0.89	0.33	-4.33	3.28	-1.04	8.09E-129	2387.98	5024.75	335.15	2022-10-20
ENSRNOT00000034940	Zbtb11	ENSRNOT00000034940.0	ENSRNOT00000034940.3	0.28	1.00	0.72	-3.21	4.59	1.38	2.56E-07	11036.57	4247.17	51.31	0.00
ENSRNOT00000006154	Cox20	ENSRNOT00000006154.1	ENSRNOT00000006154.5	0.21	1.00	0.79	-6.06	8.18	2.13	6.19E-59	2650.51	734.04	616.46	0.00
ENSRNOT00000035915	Arhgap22	ENSRNOT00000035915.0	ENSRNOT00000035915.5	0.51	0.99	0.48	-4.90	4.79	-0.11	3.74E-20	857.37	924.24	64.55	0.40
ENSRNOT00000027345	Reep5	ENSRNOT00000027345.1	ENSRNOT00000027345.2	0.65	0.85	0.20	-4.55	2.51	-2.04	5.07E-294	4425.45	18377.78	598.08	105.96
ENSRNOT00000019713	Tgoln2	ENSRNOT00000019713.1	ENSRNOT00000019713.3	0.41	0.67	0.26	-4.13	2.59	-1.54	2.60E-53	582.53	1710.10	151.52	32.22
ENSRNOT00000008238	Ppm1a	ENSRNOT00000008238.0	ENSRNOT00000008238.9	0.32	0.88	0.56	-2.84	3.20	0.36	3.42E-40	5396.16	4220.91	336.36	44.34
ENSRNOT00000072118	Alkbh7	ENSRNOT00000072118.0	ENSRNOT00000072118.5	0.21	0.99	0.78	-2.55	4.40	1.84	1.40E-04	524.55	144.65	53.54	0.61
ENSRNOT00000018028	Nipa2	ENSRNOT00000018028.1	ENSRNOT00000018028.7	0.26	0.85	0.59	-3.72	4.26	0.55	7.89E-34	4040.20	2768.69	179.80	4.14
ENSRNOT00000027752	Nucb2	ENSRNOT00000027752.0	ENSRNOT00000027752.5	0.37	1.00	0.63	-3.83	4.59	0.76	1.36E-09	158.99	91.92	53.64	0.00
ENSRNOT00000004202	Fopnl	ENSRNOT00000004202.1	ENSRNOT00000004202.4	0.20	1.00	0.80	-3.45	5.42	1.97	4.00E-10	413.94	106.26	113.13	0.00
ENSRNOT00000019919	Med31	ENSRNOT00000019919.0	ENSRNOT00000019919.4	0.19	1.00	0.81	-4.01	6.13	2022-12-02	1.15E-12	1065.76	241.82	153.43	0.00
ENSRNOT00000064984	LOC100910210	ENSRNOT00000064984.0	ENSRNOT00000064984.2	0.57	0.99	0.42	-6.42	5.94	-0.48	8.95E-108	1184.95	1637.88	330.61	2022-03-03
ENSRNOT00000029420	Nit2	ENSRNOT00000029420.0	ENSRNOT00000029420.5	0.67	0.99	0.31	-6.98	5.84	-1.14	5.43E-128	730.61	1612.32	296.97	2.63
ENSRNOT00000032739	Ccdc92	ENSRNOT00000032739.1	ENSRNOT00000032739.8	0.20	0.99	0.80	-4.51	6.51	2022-01-02	9.30E-32	3551.92	893.03	381.62	2022-02-02
ENSRNOT00000005194	Nit1	ENSRNOT00000005194.0	ENSRNOT00000005194.6	0.26	1.00	0.74	-5.87	7.43	1.56	2.59E-43	2180-10-01	792.63	345.86	0.00
ENSRNOT00000040829	Smyd3	ENSRNOT00000040829.0	ENSRNOT00000040829.6	0.25	1.00	0.75	-3.80	5.42	1.61	1.44E-09	298.69	99.39	84.85	0.00
ENSRNOT00000061583	Glmn	ENSRNOT00000061583.1	ENSRNOT00000061583.9	0.20	0.89	0.70	-1.74	2.93	1.19	1.44E-03	704.34	310.91	55.45	2022-07-07
ENSRNOT00000016885	EIF4Ebp1	ENSRNOT00000016885.1	ENSRNOT00000016885.4	0.30	1.00	0.70	-2.42	3.65	1.23	2.16E-03	99.39	42.32	23.23	0.00
ENSRNOT00000035915	Arhgap22	ENSRNOT00000035915.0	ENSRNOT00000035915.4	0.21	1.00	0.79	-3.16	2022-03-05	1.88	1.23E-06	857.37	233.23	64.55	0.00
ENSRNOT00000035915	Arhgap22	ENSRNOT00000035915.0	ENSRNOT00000035915.6	0.24	0.99	0.75	-3.04	4.61	1.57	7.93E-07	857.37	287.37	64.55	0.81
ENSRNOT00000043384	Mcph1	ENSRNOT00000043384.2	ENSRNOT00000043384.6	0.29	0.74	0.45	-3.11	2.81	-0.30	9.20E-07	63.33	77.98	71.62	2022-10-20
ENSRNOT00000000116	Thoc3	ENSRNOT00000000116.1	ENSRNOT00000000116.4	0.36	0.81	0.45	-3.56	3.29	-0.27	1.65E-14	2290.51	2771.82	149.29	55.45
ENSRNOT00000023519	Nrsn1	ENSRNOT00000023519.1	ENSRNOT00000023519.6	0.25	0.56	0.31	-1.53	0.35	-1.18	3.80E-294	8993.54	20517.98	4071.52	3542.63
ENSRNOT00000047836	Rap1a	ENSRNOT00000047836.1	ENSRNOT00000047836.7	0.17	0.90	0.72	-1.48	2.90	1.42	1.48E-03	4013.43	1529.19	51.52	4.75
ENSRNOT00000058190	Ndufc1	ENSRNOT00000058190.0	ENSRNOT00000058190.3	0.17	0.99	0.82	-3.33	5.57	2.24	1.84E-10	1860.51	393.13	149.49	2022-01-01
ENSRNOT00000011029	Tlx2	ENSRNOT00000011029.2	ENSRNOT00000011029.4	0.18	0.58	0.40	-1.06	0.45	-0.61	1.99E-14	2981-11-01	4527.98	256.36	177.68
ENSRNOT00000011029	Tlx2	ENSRNOT00000011029.2	ENSRNOT00000011029.6	0.51	0.97	0.46	-4.99	4.76	-0.23	3.29E-72	2981-11-01	3504.75	256.36	2022-07-07
ENSRNOT00000018339	Ruvbl1	ENSRNOT00000018339.0	ENSRNOT00000018339.4	0.44	0.99	0.55	-5.08	5.39	0.31	5.93E-28	784.44	632.32	123.23	2022-01-01
ENSRNOT00000009678	Mrpl50	ENSRNOT00000009678.1	ENSRNOT00000009678.7	0.16	1.00	0.84	-5.92	8.35	2.43	1.02E-41	1042.22	201.01	708.28	0.00
ENSRNOT00000050137	Mmp16	ENSRNOT00000050137.0	ENSRNOT00000050137.6	0.67	0.92	0.25	-5.41	3.82	-1.58	2.05E-119	820.40	2467.47	261.31	2022-08-18
ENSRNOT00000065926	Lyrm2	ENSRNOT00000065926.1	ENSRNOT00000065926.4	0.51	0.99	0.49	-6.76	6.68	-0.08	4.94E-78	184.04	200.51	459.09	2022-04-04
ENSRNOT00000005402	Ptrhd1	ENSRNOT00000005402.1	ENSRNOT00000005402.5	0.15	1.00	0.85	-4.22	6.66	2.44	3.60E-12	417.37	76.36	200.51	0.00
ENSRNOT00000005608	Mgat2	ENSRNOT00000005608.0	ENSRNOT00000005608.9	0.15	0.85	0.70	-2.63	3.87	1.24	3.28E-36	5829.39	2476.87	300.51	2022-06-06
ENSRNOT00000056169	Kdelr3	ENSRNOT00000056169.0	ENSRNOT00000056169.4	0.67	0.98	0.31	-6.56	5.32	-1.24	4.12E-57	130.71	324.14	139.90	0.91
ENSRNOT00000056169	Kdelr3	ENSRNOT00000056169.0	ENSRNOT00000056169.6	0.26	1.00	0.74	-4.27	5.78	1.51	2.40E-12	130.71	43.43	139.90	0.00
ENSRNOT00000056169	Kdelr3	ENSRNOT00000056169.0	ENSRNOT00000056169.7	0.30	1.00	0.70	-4.06	5.28	1.22	3.19E-13	130.71	53.43	139.90	2022-01-01
ENSRNOT00000007843	RGD1311744	ENSRNOT00000007843.2	ENSRNOT00000007843.6	0.20	0.97	0.77	-3.06	4.79	1.73	3.06E-58	15696.77	4697.37	838.99	28.18
ENSRNOT00000008685	Thy1	ENSRNOT00000008685.1	ENSRNOT00000008685.9	0.50	0.94	0.44	-3.65	3.32	-0.33	7.61E-09	547.07	668.38	32.22	1.92
ENSRNOT00000014605	Taf1d	ENSRNOT00000014605.0	ENSRNOT00000014605.2	0.26	1.00	0.73	-4.65	2022-11-06	1.46	1.58E-25	273.54	99.29	285.15	2022-01-01
ENSRNOT00000019204	Zfp717	ENSRNOT00000019204.2	ENSRNOT00000019204.7	0.17	0.97	0.80	-2.93	4.96	2022-03-02	5.39E-18	2194.55	538.89	294.65	6.97
ENSRNOT00000018028	Nipa2	ENSRNOT00000018028.1	ENSRNOT00000018028.6	0.20	0.96	0.76	-3.32	4.98	1.66	2.28E-19	4040.20	1282.02	179.80	0.91
ENSRNOT00000019623	Pcmt1	ENSRNOT00000019623.0	ENSRNOT00000019623.2	0.23	0.37	0.14	-1.88	-0.77	-2.64	3.51E-39	1649.09	10307.17	192.83	311.72
ENSRNOT00000019623	Pcmt1	ENSRNOT00000019623.0	ENSRNOT00000019623.3	0.23	0.31	0.09	-1.87	-1.54	-3.41	6.39E-39	1649.09	17558.18	192.83	576.67
ENSRNOT00000019623	Pcmt1	ENSRNOT00000019623.0	ENSRNOT00000019623.5	0.63	0.98	0.35	-5.60	4.71	-0.89	3.86E-76	1649.09	3066.67	192.83	2022-05-05
ENSRNOT00000027753	Eif1ad	ENSRNOT00000027753.1	ENSRNOT00000027753.3	0.55	0.97	0.43	-5.11	4.69	-0.42	3.09E-41	865.45	1166.97	131.21	2022-03-03
ENSRNOT00000041238	Klc2	ENSRNOT00000041238.1	ENSRNOT00000041238.5	0.29	0.82	0.52	-2.04	2.17	0.13	3.74E-76	4532.42	4129.90	759.29	155.15
ENSRNOT00000065177	Irak1	ENSRNOT00000065177.1	ENSRNOT00000065177.4	0.42	0.51	0.09	-3.42	0.02	-3.40	1.67E-23	591.72	6248.48	63.43	102.02
ENSRNOT00000000253	Zfp207	ENSRNOT00000000253.0	ENSRNOT00000000253.10	0.33	0.83	0.51	-2.32	2.37	0.05	1.11E-19	3051.72	3000.00	160.40	32.83
ENSRNOT00000004999	Cdip1	ENSRNOT00000004999.1	ENSRNOT00000004999.2	0.64	0.84	0.21	-4.57	2.63	-1.95	1.98E-84	1089.90	4207.68	171.72	25.25
ENSRNOT00000005293	Map2k4	ENSRNOT00000005293.2	ENSRNOT00000005293.4	0.65	0.73	0.08	-5.25	1.75	-3.49	0.00E+00	3398.28	38290.61	1342.02	746.16
ENSRNOT00000007079	Crebbp	ENSRNOT00000007079.0	ENSRNOT00000007079.3	0.44	0.85	0.41	-4.13	3.63	-0.51	8.12E-97	1089.09	1549.29	338.08	14.14
ENSRNOT00000010448	Supt4h1	ENSRNOT00000010448.1	ENSRNOT00000010448.4	0.28	0.91	0.64	-3.08	3.90	0.82	2.16E-28	3820.40	2188.18	363.54	46.36
ENSRNOT00000010778	Timm22	ENSRNOT00000010778.1	ENSRNOT00000010778.4	0.32	0.79	0.47	-2.25	2022-07-02	-0.18	8.24E-55	3131.92	3536.26	543.84	158.38
ENSRNOT00000016759	Supt6h	ENSRNOT00000016759.1	ENSRNOT00000016759.4	0.17	0.91	0.74	-1.75	3.25	1.49	2.67E-16	5843.23	2071.82	376.16	39.29
ENSRNOT00000024406	Ube2i	ENSRNOT00000024406.0	ENSRNOT00000024406.2	0.23	0.94	0.71	-3.26	4.55	1.29	9.77E-57	15686.06	6412-12-01	978.08	92.63
ENSRNOT00000026168	Emc6	ENSRNOT00000026168.2	ENSRNOT00000026168.3	0.23	1.00	0.77	-5.25	6.98	1.73	2.73E-53	2846.97	855.05	547.37	2022-02-02
ENSRNOT00000048490	Ddx5	ENSRNOT00000048490.0	ENSRNOT00000048490.3	0.19	0.48	0.29	-1.18	-0.14	-1.32	5.44E-36	17967.78	47007.27	410.10	437.47
ENSRNOT00000054955	Alyref	ENSRNOT00000054955.1	ENSRNOT00000054955.4	0.31	0.99	0.68	-3.24	4.35	2022-11-01	5.48E-10	525.35	240.51	71.52	2022-01-01
ENSRNOT00000002511	Mzt2b	ENSRNOT00000002511.1	ENSRNOT00000002511.5	0.29	0.93	0.64	-2.91	3.75	0.84	4.22E-11	429.70	240.20	113.13	2022-09-09
ENSRNOT00000035611	Kpna1	ENSRNOT00000035611.1	ENSRNOT00000035611.4	0.57	0.97	0.40	-4.41	3.84	-0.58	1.89E-13	458.28	682.02	38.48	2022-01-01
ENSRNOT00000004995	Mgat5	ENSRNOT00000004995.5	ENSRNOT00000004995.6	0.16	1.00	0.84	-4.64	2022-03-07	2.39	4.08E-29	3837.37	735.56	452.53	2022-02-02
ENSRNOT00000040829	Smyd3	ENSRNOT00000040829.0	ENSRNOT00000040829.2	0.45	0.52	0.07	-3.94	0.14	-3.80	1.26E-26	298.69	4202.53	84.85	218.69
ENSRNOT00000074527	LOC100911356	ENSRNOT00000074527.1	ENSRNOT00000074527.8	0.21	0.26	0.05	-2.68	-1.66	-4.34	1.60E-45	358.38	7313.84	110.81	304.85
ENSRNOT00000003087	Slain2	ENSRNOT00000003087.1	ENSRNOT00000003087.5	0.50	0.59	0.09	-4.02	0.61	-3.40	2.45E-134	573.13	6109.60	204.75	84.85
ENSRNOT00000003106	Hnrnpdl	ENSRNOT00000003106.0	ENSRNOT00000003106.5	0.28	0.48	0.19	-1.81	-0.26	-2.07	7.82E-16	1981.21	8443.84	107.07	150.40
ENSRNOT00000004030	Tbc1d19	ENSRNOT00000004030.0	ENSRNOT00000004030.2	0.41	0.93	0.52	-2.80	2.90	0.10	3.40E-06	2140.51	2003.43	34.34	2022-04-04
ENSRNOT00000017086	Sugt1	ENSRNOT00000017086.0	ENSRNOT00000017086.2	0.16	0.98	0.82	-2.99	5.20	2.21	5.27E-16	4787.78	1031.21	258.08	2022-04-04
ENSRNOT00000018599	Nefl	ENSRNOT00000018599.0	ENSRNOT00000018599.4	0.22	0.44	0.22	-1.47	-0.34	-1.81	0.00E+00	284865.76	999450.40	12518.89	16020.51
ENSRNOT00000039423	Ndfip2	ENSRNOT00000039423.1	ENSRNOT00000039423.4	0.37	0.69	0.32	-2.91	1.85	-1.06	9.47E-70	8947.47	18762.83	551.72	339.39
ENSRNOT00000061214	RGD1306063	ENSRNOT00000061214.1	ENSRNOT00000061214.9	0.39	0.99	0.59	-5.01	5.55	0.54	1.79E-72	653.23	446.06	478.48	2022-08-08
ENSRNOT00000071133	Gng2	ENSRNOT00000071133.2	ENSRNOT00000071133.3	0.40	0.82	0.42	-2.70	2.24	-0.46	8.45E-199	5886.36	8069.29	1226.57	267.27
ENSRNOT00000014202	Pcm1	ENSRNOT00000014202.0	ENSRNOT00000014202.2	0.43	1.00	0.57	-6.36	6.78	0.43	8.21E-52	1738.48	1293.94	227.07	0.00
ENSRNOT00000019454	Ing1	ENSRNOT00000019454.2	ENSRNOT00000019454.5	0.81	0.91	0.10	-6.12	2.91	-3.21	4.97E-30	384.24	3562.22	36.36	2022-05-05
ENSRNOT00000021073	Tpm4	ENSRNOT00000021073.2	ENSRNOT00000021073.6	0.20	0.34	0.14	-1.66	-0.99	-2.64	9.57E-70	1306.57	8165.25	481.11	916.46
ENSRNOT00000025828	Rab18	ENSRNOT00000025828.0	ENSRNOT00000025828.3	0.47	0.70	0.23	-3.11	1.40	-1.71	0.00E+00	28842.53	94053.03	2923-03-01	1577.27
ENSRNOT00000034907	Prtfdc1	ENSRNOT00000034907.1	ENSRNOT00000034907.3	0.36	0.97	0.61	-3.95	4.61	0.66	8.24E-16	1609.29	1003.23	95.96	2022-03-03
ENSRNOT00000020030	Srfbp1	ENSRNOT00000020030.0	ENSRNOT00000020030.3	0.63	1.00	0.37	-5.60	4.81	-0.80	2.91E-26	411.01	715.45	62.63	0.00
ENSRNOT00000023886	Pias2	ENSRNOT00000023886.0	ENSRNOT00000023886.4	0.61	0.94	0.34	-4.71	3.73	-0.98	9.76E-36	472.83	935.96	93.23	2022-04-04
ENSRNOT00000025510	Txnl1	ENSRNOT00000025510.0	ENSRNOT00000025510.4	0.47	0.64	0.18	-3.09	0.89	-2.21	9.91E-101	4404.55	20356.36	279.49	146.97
ENSRNOT00000025510	Txnl1	ENSRNOT00000025510.0	ENSRNOT00000025510.6	0.26	0.98	0.72	-3.92	5.28	1.35	2.47E-30	4404.55	1725.86	279.49	2022-06-06
ENSRNOT00000039377	Riok3	ENSRNOT00000039377.1	ENSRNOT00000039377.2	0.59	0.96	0.36	-5.14	4.31	-0.83	3.77E-88	1787.58	3145.66	251.92	2022-12-12
ENSRNOT00000066133	Csnk1a1	ENSRNOT00000066133.1	ENSRNOT00000066133.5	0.17	0.65	0.48	-1.04	0.91	-0.12	9.37E-120	58854.34	64066.36	3075.86	1645.96
ENSRNOT00000019740	Trappc2l	ENSRNOT00000019740.0	ENSRNOT00000019740.5	0.16	1.00	0.84	-3.83	6.23	2.40	3.63E-13	1743.84	327.98	185.76	0.00
ENSRNOT00000014912	Ssr3	ENSRNOT00000014912.1	ENSRNOT00000014912.3	0.30	0.61	0.31	-2.32	1.18	-1.14	8.63E-35	7250.40	16021.11	587.78	614.04
ENSRNOT00000017770	Sh3glb1	ENSRNOT00000017770.1	ENSRNOT00000017770.5	0.43	0.73	0.30	-2.65	1.43	-1.22	4.51E-96	2032-02-01	4816.57	439.09	161.41
ENSRNOT00000028210	Ube2q1	ENSRNOT00000028210.0	ENSRNOT00000028210.2	0.40	0.88	0.48	-3.48	3.38	-0.10	7.41E-65	5122.53	5502.93	294.75	21.21
ENSRNOT00000028744	Anp32e	ENSRNOT00000028744.0	ENSRNOT00000028744.4	0.18	0.38	0.20	-1.17	-0.82	-1.99	1.12E-22	4225.56	16788.99	232.32	379.70
ENSRNOT00000064752	Jtb	ENSRNOT00000064752.0	ENSRNOT00000064752.5	0.29	0.73	0.43	-1.79	1.40	-0.39	2.45E-96	3067.58	4000.30	1104.34	415.45
ENSRNOT00000066199	Fubp1	ENSRNOT00000066199.0	ENSRNOT00000066199.4	0.22	0.91	0.70	-2.56	3.78	1.22	4.39E-15	4933-03-01	2133.94	144.34	2022-06-06
ENSRNOT00000000650	Glo1	ENSRNOT00000000650.1	ENSRNOT00000000650.4	0.21	0.87	0.66	-3.05	4.00	0.94	1.56E-90	15435.56	8018-08-01	1323.74	160.30
ENSRNOT00000001051	Tbc1d32	ENSRNOT00000001051.2	ENSRNOT00000001051.7	0.52	1.00	0.48	-6.60	6.47	-0.13	9.58E-67	410.61	449.80	260.51	0.91
ENSRNOT00000036365	Sec63	ENSRNOT00000036365.1	ENSRNOT00000036365.4	0.48	0.93	0.45	-3.69	3.37	-0.32	5.00E-21	2660.20	3293.13	86.67	2022-08-08
ENSRNOT00000006329	Napb	ENSRNOT00000006329.3	ENSRNOT00000006329.5	0.42	0.43	0.00	-7.55	-0.46	-8.01	1.95E-178	125.76	32797.07	107.37	109.09
ENSRNOT00000007558	Csnk2a1	ENSRNOT00000007558.2	ENSRNOT00000007558.5	0.23	0.94	0.71	-2.85	4.17	1.33	2.78E-31	14792.12	5942-02-01	477.78	39.19
ENSRNOT00000012287	Cops2	ENSRNOT00000012287.1	ENSRNOT00000012287.4	0.26	0.82	0.56	-2.26	2.62	0.36	2.66E-23	7314-04-01	5668.18	321.92	76.67
ENSRNOT00000014445	Ndor1	ENSRNOT00000014445.0	ENSRNOT00000014445.5	0.22	0.99	0.76	-3.78	5.46	1.68	7.04E-14	905.05	284.44	139.80	2022-01-01
ENSRNOT00000020373	Tpd52l2	ENSRNOT00000020373.1	ENSRNOT00000020373.5	0.53	0.74	0.20	-4.39	2.37	-2.02	4.74E-55	891.72	3540-10-01	208.99	132.22
ENSRNOT00000020451	Mrps5	ENSRNOT00000020451.1	ENSRNOT00000020451.4	0.18	1.00	0.82	-4.26	6.47	2.20	3.82E-14	922.22	198.59	182.83	0.00
ENSRNOT00000020478	Pdia3	ENSRNOT00000020478.1	ENSRNOT00000020478.5	0.34	0.53	0.19	-2.26	0.18	-2.08	4.08E-20	2272.73	9683.54	102.83	113.94
ENSRNOT00000023786	Eif2s2	ENSRNOT00000023786.0	ENSRNOT00000023786.4	0.40	0.69	0.29	-3.61	2.30	-1.30	2.48E-143	8473.23	20857.17	738.08	362.02
ENSRNOT00000029386	Samd10	ENSRNOT00000029386.0	ENSRNOT00000029386.4	0.25	0.41	0.16	-1.85	-0.53	-2.38	6.57E-47	2338.79	12190.81	234.34	308.08
ENSRNOT00000051064	Cdc25b	ENSRNOT00000051064.1	ENSRNOT00000051064.4	0.49	0.74	0.26	-3.44	1.90	-1.54	8.62E-68	1716.26	4990.00	250.30	96.87
ENSRNOT00000044446	H2afj	ENSRNOT00000044446.0	ENSRNOT00000044446.5	0.39	1.00	0.61	-5.26	5.93	0.67	1.59E-24	526.77	326.97	128.99	0.00
ENSRNOT00000075400	Gng12	ENSRNOT00000075400.2	ENSRNOT00000075400.5	0.21	0.41	0.20	-1.41	-0.57	-1.97	1.23E-88	1863.84	7310.81	763.43	967.68
ENSRNOT00000010061	Dnaja1	ENSRNOT00000010061.1	ENSRNOT00000010061.3	0.21	0.62	0.41	-1.29	0.78	-0.51	5.28E-103	58751.41	83510.30	1529.70	880.61
ENSRNOT00000010061	Dnaja1	ENSRNOT00000010061.1	ENSRNOT00000010061.5	0.18	0.71	0.53	-1.27	1.45	0.18	4.40E-74	58751.41	51929.29	1529.70	570.71
ENSRNOT00000010318	Cmpk1	ENSRNOT00000010318.0	ENSRNOT00000010318.3	0.24	0.77	0.53	-1.66	1.83	0.17	2.66E-169	11794.85	10440.00	3292-12-01	1077.58
ENSRNOT00000018049	Sfpq	ENSRNOT00000018049.0	ENSRNOT00000018049.2	0.34	0.79	0.45	-2.46	2.16	-0.30	8.64E-20	6071.41	7509.90	130.00	31.11
ENSRNOT00000018049	Sfpq	ENSRNOT00000018049.0	ENSRNOT00000018049.3	0.36	0.80	0.44	-2.69	2.33	-0.36	3.39E-21	6071.41	7815.96	130.00	30.30
ENSRNOT00000019959	AI314180	ENSRNOT00000019959.1	ENSRNOT00000019959.3	0.36	0.94	0.58	-3.57	2022-05-04	0.48	7.18E-33	3916.97	2815.35	202.93	2022-01-11
ENSRNOT00000064418	Minos1	ENSRNOT00000064418.0	ENSRNOT00000064418.4	0.25	1.00	0.75	-6.54	8.15	1.61	1.83E-149	2698-08-01	878.28	1612.12	2022-04-04
ENSRNOT00000010300	Actr10	ENSRNOT00000010300.1	ENSRNOT00000010300.4	0.31	0.70	0.39	-2.70	2022-07-02	-0.63	2.56E-40	8067.17	12520.81	629.70	412.83
ENSRNOT00000005491	Atp2b1	ENSRNOT00000005491.0	ENSRNOT00000005491.10	0.32	0.76	0.44	-2.30	1.95	-0.35	4.29E-14	1569.39	2000.40	211.62	107.37
ENSRNOT00000006239	Dazap2	ENSRNOT00000006239.1	ENSRNOT00000006239.3	0.47	0.78	0.31	-2.99	1.86	-1.13	1.37E-69	2474.34	5398.99	317.17	106.87
ENSRNOT00000006402	Eny2	ENSRNOT00000006402.1	ENSRNOT00000006402.4	0.20	0.98	0.78	-4.56	6.40	1.84	1.91E-44	7504-04-01	2082.63	585.86	2022-11-11
ENSRNOT00000010720	Cand1	ENSRNOT00000010720.0	ENSRNOT00000010720.7	0.37	0.84	0.47	-2.54	2.38	-0.17	8.26E-82	9625.76	10812.02	658.18	159.39
ENSRNOT00000010957	Slc48a1	ENSRNOT00000010957.1	ENSRNOT00000010957.4	0.23	0.97	0.74	-3.19	4.70	1.52	5.71E-15	1080.81	379.29	233.33	13.13
ENSRNOT00000016464	Exosc4	ENSRNOT00000016464.0	ENSRNOT00000016464.2	0.21	0.57	0.37	-1.22	0.43	-0.79	4.02E-16	531.31	924.14	272.73	193.94
ENSRNOT00000016520	Samm50	ENSRNOT00000016520.0	ENSRNOT00000016520.5	0.23	1.00	0.77	-2.64	4.41	1.77	1.23E-04	1202.02	350.10	41.41	0.00
ENSRNOT00000025979	Rbx1	ENSRNOT00000025979.0	ENSRNOT00000025979.2	0.29	0.96	0.67	-3.35	4.35	2022-01-01	2.79E-74	2133.13	1059.39	764.34	35.66
ENSRNOT00000041325	Atcay	ENSRNOT00000041325.1	ENSRNOT00000041325.2	0.27	0.49	0.22	-1.77	-0.08	-1.85	2.14E-04	299.39	1081.82	2022-12-22	24.24
ENSRNOT00000015299	Tmem30a	ENSRNOT00000015299.0	ENSRNOT00000015299.4	0.20	0.60	0.40	-1.75	1.17	-0.59	6.23E-198	27346.26	41311.21	1014.24	222.93
ENSRNOT00000015609	Rab3d	ENSRNOT00000015609.0	ENSRNOT00000015609.4	0.27	0.55	0.28	-1.69	0.32	-1.36	4.74E-35	2069.39	5339.49	398.38	393.64
ENSRNOT00000030221	AABR06055804.1	ENSRNOT00000030221.0	ENSRNOT00000030221.8	0.25	0.32	0.07	-2.46	-1.20	-3.65	3.02E-187	2115.45	26438.89	817.88	2338.89
ENSRNOT00000052392	Cadm1	ENSRNOT00000052392.2	ENSRNOT00000052392.5	0.69	0.82	0.13	-5.66	2.94	-2.72	0.00E+00	2597.78	17140.61	2211.62	435.86
ENSRNOT00000074772	Usp19	ENSRNOT00000074772.0	ENSRNOT00000074772.2	0.17	0.85	0.69	-1.32	2.46	1.14	3.85E-06	2995.56	1363.43	140.30	24.24
ENSRNOT00000021803	Rpl7l1	ENSRNOT00000021803.3	ENSRNOT00000021803.6	0.67	0.70	0.03	-8.11	3.13	-4.98	2.13E-221	60.91	1972.22	263.64	63.64
ENSRNOT00000022676	Nop58	ENSRNOT00000022676.0	ENSRNOT00000022676.3	0.39	0.97	0.57	-4.12	4.54	0.41	9.58E-28	3051.82	2285-05-01	146.36	2022-05-05
ENSRNOT00000026646	EIF4E2	ENSRNOT00000026646.0	ENSRNOT00000026646.5	0.56	0.96	0.40	-5.13	4.56	-0.56	2.42E-261	10083.03	14879.60	818.69	33.13
ENSRNOT00000010135	Sms	ENSRNOT00000010135.1	ENSRNOT00000010135.3	0.49	0.98	0.49	-5.45	5.40	-0.05	3.51E-226	3313.74	3427.27	929.70	2022-10-20
ENSRNOT00000011317	Rbm10	ENSRNOT00000011317.0	ENSRNOT00000011317.4	0.24	0.96	0.72	-2.95	4.34	1.40	1.12E-07	1000.51	383.33	71.72	2022-02-02
ENSRNOT00000065075	Ap1s2	ENSRNOT00000065075.1	ENSRNOT00000065075.4	0.20	0.34	0.14	-1.40	-1.26	-2.66	6.99E-44	1331.01	8494.14	268.18	508.99
ENSRNOT00000066674	Maoa	ENSRNOT00000066674.0	ENSRNOT00000066674.4	0.42	0.75	0.32	-3.44	2.37	-1.06	2.07E-62	3152.22	6588-08-01	296.77	101.52
ENSRNOT00000027459	Asrgl1	ENSRNOT00000027459.1	ENSRNOT00000027459.2	0.34	0.97	0.64	-3.80	4.60	0.80	1.90E-12	345.45	197.68	82.63	2022-02-02
ENSRNOT00000074527	LOC100911356	ENSRNOT00000074527.1	ENSRNOT00000074527.6	0.63	0.94	0.31	-5.24	2022-08-04	-1.16	5.17E-46	358.38	809.09	110.81	2022-04-04
ENSRNOT00000024366	Coa5	ENSRNOT00000024366.2	ENSRNOT00000024366.6	0.40	0.49	0.09	-3.29	-0.04	-3.34	0.00E+00	1386.46	13995.86	2646.26	2797.98
ENSRNOT00000028588	Cyth2	ENSRNOT00000028588.0	ENSRNOT00000028588.3	0.22	0.99	0.77	-3.75	5.46	1.71	4.36E-14	1543.84	476.36	151.52	2022-02-02
ENSRNOT00000008325	Ndufa5	ENSRNOT00000008325.0	ENSRNOT00000008325.4	0.34	0.99	0.65	-5.35	6.25	0.90	0.00E+00	13064.95	7112.42	3711.82	44.85
ENSRNOT00000014395	Mark3	ENSRNOT00000014395.0	ENSRNOT00000014395.7	0.17	1.00	0.83	-3.84	6.17	2.34	9.11E-12	2007.47	412.93	148.99	0.00
ENSRNOT00000027272	Map2k2	ENSRNOT00000027272.0	ENSRNOT00000027272.5	0.35	0.80	0.45	-3.58	3.28	-0.30	2.20E-40	3304.14	4056.16	294.85	73.54
ENSRNOT00000028703	Cebpg	ENSRNOT00000028703.1	ENSRNOT00000028703.3	0.61	0.70	0.09	-5.33	2022-01-02	-3.32	1.59E-241	802.02	8017.47	433.64	229.19
ENSRNOT00000041238	Klc2	ENSRNOT00000041238.1	ENSRNOT00000041238.4	0.18	0.96	0.78	-3.89	5.72	1.83	1.49E-35	4532.42	1272.32	759.29	41.41
ENSRNOT00000066534	Rbfox1	ENSRNOT00000066534.1	ENSRNOT00000066534.4	0.39	0.65	0.26	-2.71	1.17	-1.54	6.64E-43	3692.42	10756.97	257.98	194.04
ENSRNOT00000043004	Pbx1	ENSRNOT00000043004.2	ENSRNOT00000043004.5	0.77	1.00	0.23	-7.88	6.14	-1.73	2.46E-87	194.95	645.86	166.67	0.00
ENSRNOT00000046053	AABR06087686.1	ENSRNOT00000046053.1	ENSRNOT00000046053.4	0.26	0.83	0.57	-2.69	2022-09-03	0.40	4.88E-19	4850.00	3691.31	554.44	199.60
ENSRNOT00000036365	Sec63	ENSRNOT00000036365.1	ENSRNOT00000036365.2	0.54	0.94	0.41	-4.12	3.58	-0.54	6.69E-27	2660.20	3858.48	86.67	2022-05-05
ENSRNOT00000056151	Serf2	ENSRNOT00000056151.0	ENSRNOT00000056151.3	0.39	0.85	0.46	-2.88	2.64	-0.24	3.15E-50	1325.25	1525.05	322.93	52.53
ENSRNOT00000013124	Mkrn1	ENSRNOT00000013124.1	ENSRNOT00000013124.6	0.48	0.69	0.20	-3.50	1.53	-1.97	2.34E-241	4774.95	18641.82	722.02	310.81
ENSRNOT00000061139	Pnisr	ENSRNOT00000061139.1	ENSRNOT00000061139.3	0.29	0.98	0.68	-3.89	5.00	2022-11-01	1.41E-34	5408.99	2520.00	281.72	2022-08-08
ENSRNOT00000010512	Tmed10	ENSRNOT00000010512.0	ENSRNOT00000010512.2	0.15	0.99	0.84	-4.53	6.88	2.35	4.99E-97	11736.26	2313.64	1519.19	2022-08-08
ENSRNOT00000024691	Vkorc1l1	ENSRNOT00000024691.0	ENSRNOT00000024691.8	0.42	0.68	0.26	-2.58	2022-06-01	-1.52	1.23E-32	722.32	2051-01-01	141.62	67.68
ENSRNOT00000027752	Nucb2	ENSRNOT00000027752.0	ENSRNOT00000027752.4	0.36	1.00	0.64	-3.75	4.59	0.84	2.89E-09	158.99	87.78	53.64	0.00
ENSRNOT00000003473	Sap30l	ENSRNOT00000003473.2	ENSRNOT00000003473.5	0.46	0.55	0.10	-3.63	0.38	-3.24	5.56E-65	926.16	8681.52	111.92	63.54
ENSRNOT00000067317	Fbxl20	ENSRNOT00000067317.5	ENSRNOT00000067317.6	0.31	1.00	0.69	-5.01	6.16	1.15	1.57E-60	2457.58	1105.05	444.44	2022-03-03
ENSRNOT00000007824	Pno1	ENSRNOT00000007824.1	ENSRNOT00000007824.3	0.20	0.41	0.21	-1.10	-0.78	-1.88	8.04E-10	1045.96	3852.63	84.85	120.00
ENSRNOT00000014821	Gch1	ENSRNOT00000014821.0	ENSRNOT00000014821.4	0.39	0.48	0.09	-2.94	-0.40	-3.34	2.13E-66	1444.75	14657.78	198.89	334.14
ENSRNOT00000058204	Serp2	ENSRNOT00000058204.1	ENSRNOT00000058204.3	0.17	0.36	0.19	-1.24	-0.84	-2.07	9.25E-34	819.19	3457-07-01	482.63	863.03
ENSRNOT00000061214	RGD1306063	ENSRNOT00000061214.1	ENSRNOT00000061214.5	0.37	0.92	0.54	-4.16	4.41	0.26	5.34E-40	653.23	542.53	478.48	77.47
ENSRNOT00000000467	Nus1	ENSRNOT00000000467.1	ENSRNOT00000000467.2	0.82	0.91	0.09	-6.57	3.24	-3.33	8.08E-137	569.60	5665.56	159.60	15.15
ENSRNOT00000000631	RGD735065	ENSRNOT00000000631.0	ENSRNOT00000000631.3	0.36	0.99	0.63	-5.33	2022-12-06	0.79	2.09E-56	833.54	479.70	357.17	2022-02-02
ENSRNOT00000037332	Dnajc14	ENSRNOT00000037332.0	ENSRNOT00000037332.2	0.19	0.95	0.76	-3.08	4.74	1.66	2.42E-14	1744.34	551.31	138.38	2022-01-01
ENSRNOT00000048848	Rbms2	ENSRNOT00000048848.0	ENSRNOT00000048848.6	0.17	0.97	0.80	-4.32	6.33	2022-01-02	2.44E-19	276.16	71.01	1166.06	49.49
Table S14 : Promoter-proximal shifts in NGF-treated axons as compared to cell bodies. Columns represent: 1- Ensembl Rn5 transcript ID, 2- Rat Rn5 gene symbol, 3- promoter-proximal (Ip) 3’ UTR isoform ID, 4- promoter-distal (Id) 3’ UTR isoform ID, 5- difference in relative promoter-proximal usage between axons and cell bodies in NGF, 6- relative promoter-proximal usage in NGF axons, 7- relative pr…
