# Supplementary material for: The predicted RNA-binding protein regulome of axonal mRNAs
Source: HighWire-hosted journal article supplement (doi:10.1101/gr.277804.123), 2023-08-15
Supplement: Supplemental_Tables.zip [file Supplemental Table S15.xlsx]

## Sheet: Sheet1
txID	geneSymbol	imIDp	uniqueID	dPUD(Ip/(Ip+Id))	mPUD.axon	mPUD.cb	dRUD(Id/Ip)	mRUD.axon	mRUD.cb	FDR	proxi.cb	dist.cb	proxi.ax	dist.ax
ENSRNOT00000055721	Usp29	ENSRNOT00000055721.1	ENSRNOT00000055721.0	0.27	0.96	0.69	-3.70	4.85	1.15	5.72E-32	1496.77	671.31	236.06	2022-02-02
ENSRNOT00000024400	Ppp6r1	ENSRNOT00000024400.1	ENSRNOT00000024400.0	0.48	0.85	0.37	-3.14	2.39	-0.76	1.36E-16	299.70	506.46	66.36	2022-10-10
ENSRNOT00000026063	Stx1b	ENSRNOT00000026063.1	ENSRNOT00000026063.0	0.65	0.68	0.03	-6.82	1.95	-4.87	3.95E-41	73.43	2205.76	48.28	41.41
ENSRNOT00000022309	Got1	ENSRNOT00000022309.1	ENSRNOT00000022309.0	0.22	0.34	0.11	-1.98	-0.99	-2.97	2.22E-63	5754.55	45473.74	274.55	531.21
ENSRNOT00000003514	Carhsp1	ENSRNOT00000003514.1	ENSRNOT00000003514.0	0.37	0.85	0.47	-3.09	2.95	-0.14	1.10E-65	2440.20	2699.29	461.11	83.33
ENSRNOT00000075733	Phb	ENSRNOT00000075733.1	ENSRNOT00000075733.0	0.65	0.93	0.28	-5.06	3.69	-1.37	7.31E-100	1845.56	4777.27	239.09	2022-11-21
ENSRNOT00000027957	G6PC	ENSRNOT00000027957.1	ENSRNOT00000027957.0	0.60	0.72	0.12	-4.19	1.33	-2.86	9.84E-117	1648.99	11974.04	206.77	79.70
ENSRNOT00000004862	Hn1	ENSRNOT00000004862.1	ENSRNOT00000004862.0	0.17	0.74	0.57	-1.18	1.55	0.38	2.22E-14	8740.00	6721.41	375.76	134.95
ENSRNOT00000002373	Mfi2	ENSRNOT00000002373.1	ENSRNOT00000002373.0	0.26	0.98	0.72	-3.69	2022-04-05	1.35	8.23E-10	149.39	57.58	100.30	2022-01-01
ENSRNOT00000002545	Hic2	ENSRNOT00000002545.1	ENSRNOT00000002545.0	0.84	0.88	0.04	-7.60	2.95	-4.66	3.45E-76	84.75	2225.86	68.69	10.91
ENSRNOT00000003460	Mrps14	ENSRNOT00000003460.1	ENSRNOT00000003460.0	0.62	0.86	0.24	-4.21	2.58	-1.63	2.22E-182	3149.80	9796.16	427.07	59.60
ENSRNOT00000019921	Rnf152	ENSRNOT00000019921.2	ENSRNOT00000019921.0	0.74	0.97	0.23	-5.43	3.55	-1.88	5.55E-17	39.19	156.57	31.31	2022-01-01
ENSRNOT00000003391	Insig2	ENSRNOT00000003391.1	ENSRNOT00000003391.0	0.39	0.51	0.11	-3.01	0.05	-2.96	4.24E-28	1390.30	10815.96	73.64	79.70
ENSRNOT00000067135	Rgl1	ENSRNOT00000067135.1	ENSRNOT00000067135.0	0.84	0.94	0.10	-6.97	3.73	-3.25	4.28E-47	90.71	855.96	57.58	2022-04-04
ENSRNOT00000044477	Hnrnpu	ENSRNOT00000044477.1	ENSRNOT00000044477.0	0.17	0.61	0.44	-1.74	1.40	-0.34	1.13E-22	14292.02	18150.10	420.61	241.01
ENSRNOT00000008030	Nsg1	ENSRNOT00000008030.1	ENSRNOT00000008030.0	0.29	0.35	0.06	-2.95	-1.02	-3.97	0.00E+00	7083.13	112859.49	1204.95	1837.37
ENSRNOT00000060193	Mrpl52	ENSRNOT00000060193.1	ENSRNOT00000060193.0	0.56	0.72	0.16	-3.94	1.55	-2.39	1.02E-60	419.29	2214.24	135.66	48.08
ENSRNOT00000023037	Itm2b	ENSRNOT00000023037.2	ENSRNOT00000023037.0	0.26	0.50	0.24	-1.66	-0.02	-1.68	2.99E-50	21418.69	68739.29	597.78	822.63
ENSRNOT00000060404	Dda1	ENSRNOT00000060404.1	ENSRNOT00000060404.0	0.25	0.85	0.61	-2.55	3.18	0.63	1.44E-17	2088.89	1351.92	166.26	18.18
ENSRNOT00000020181	Ash2l	ENSRNOT00000020181.1	ENSRNOT00000020181.0	0.20	0.82	0.62	-2.48	3.16	0.68	2.95E-05	5110.91	3194.95	69.60	2022-03-13
ENSRNOT00000026039	Polb	ENSRNOT00000026039.1	ENSRNOT00000026039.0	0.62	0.97	0.35	-6.04	5.17	-0.87	2.61E-60	326.97	593.64	176.77	2022-05-05
ENSRNOT00000019556	Fam32a	ENSRNOT00000019556.1	ENSRNOT00000019556.0	0.50	0.87	0.37	-3.27	2.50	-0.78	2.33E-13	403.33	691.72	50.30	2022-08-08
ENSRNOT00000024781	Isca1	ENSRNOT00000024781.1	ENSRNOT00000024781.0	0.46	0.58	0.11	-3.62	0.66	-2.96	0.00E+00	1365.66	10631.21	728.38	165.66
ENSRNOT00000025916	Hnrnpk	ENSRNOT00000025916.1	ENSRNOT00000025916.0	0.24	0.36	0.13	-1.77	-1.03	-2.80	2.33E-94	11427.88	79622.93	392.22	626.06
ENSRNOT00000068545	Crem	ENSRNOT00000068545.1	ENSRNOT00000068545.0	0.15	0.99	0.84	-4.12	6.51	2.39	2.54E-19	2196.87	415.35	320.10	1.92
ENSRNOT00000044662	Lgals8	ENSRNOT00000044662.1	ENSRNOT00000044662.0	0.42	0.47	0.04	-3.65	-0.80	-4.45	2.83E-48	586.57	12775.05	128.08	435.25
ENSRNOT00000026989	Paip2	ENSRNOT00000026989.1	ENSRNOT00000026989.0	0.56	0.72	0.16	-3.81	1.42	-2.40	0.00E+00	4362.73	22912.93	1038.89	295.86
ENSRNOT00000021516	Zmat2	ENSRNOT00000021516.1	ENSRNOT00000021516.0	0.26	0.45	0.19	-1.76	-0.31	-2.07	2.34E-25	2134.85	8967.88	102.83	86.67
ENSRNOT00000027345	Reep5	ENSRNOT00000027345.1	ENSRNOT00000027345.0	0.22	0.27	0.05	-2.95	-1.45	-4.40	1.98E-247	4514.75	94943.43	559.09	1505.56
ENSRNOT00000026398	Etf1	ENSRNOT00000026398.1	ENSRNOT00000026398.0	0.22	0.59	0.37	-1.34	0.57	-0.76	2.90E-36	3064-04-01	5201.31	269.90	115.76
ENSRNOT00000024120	Nip30	ENSRNOT00000024120.1	ENSRNOT00000024120.0	0.19	0.40	0.21	-1.36	-0.56	-1.92	5.62E-11	343.64	1295.86	118.69	176.67
ENSRNOT00000025608	Nutf2	ENSRNOT00000025608.2	ENSRNOT00000025608.0	0.26	0.67	0.41	-2.17	1.67	-0.50	5.21E-16	1926.46	2721.62	344.44	232.02
ENSRNOT00000067141	LOC100363716	ENSRNOT00000067141.2	ENSRNOT00000067141.0	0.28	0.36	0.08	-2.61	-0.83	-3.44	6.66E-88	1302.63	14184.65	244.85	395.66
ENSRNOT00000072494	LOC288913	ENSRNOT00000072494.1	ENSRNOT00000072494.0	0.28	0.99	0.70	-5.17	6.41	1.24	6.30E-47	1929.90	822.32	370.40	2022-03-03
ENSRNOT00000022366	Tmem167a	ENSRNOT00000022366.1	ENSRNOT00000022366.0	0.38	0.61	0.23	-2.44	0.71	-1.72	3.99E-29	2269.49	7662.73	114.14	66.67
ENSRNOT00000017379	Naa15	ENSRNOT00000017379.1	ENSRNOT00000017379.0	0.74	0.94	0.20	-5.87	3.90	-1.97	2.89E-120	391.82	1532.32	212.12	2022-05-05
ENSRNOT00000056652	Shc1	ENSRNOT00000056652.1	ENSRNOT00000056652.0	0.29	0.65	0.36	-2.30	1.49	-0.81	1.43E-05	2265.45	3965.25	38.38	19.19
ENSRNOT00000014602	Scamp1	ENSRNOT00000014602.1	ENSRNOT00000014602.0	0.19	0.57	0.38	-1.58	0.86	-0.72	1.67E-38	12614.75	20837.68	434.85	258.38
ENSRNOT00000015217	Ndufs4	ENSRNOT00000015217.1	ENSRNOT00000015217.0	0.63	0.71	0.08	-5.34	1.87	-3.47	9.29E-124	2002.53	22195.15	187.58	99.60
ENSRNOT00000015720	Stmn2	ENSRNOT00000015720.1	ENSRNOT00000015720.0	0.30	0.57	0.27	-1.85	0.44	-1.42	0.00E+00	146688.18	391604.34	17522.93	13079.19
ENSRNOT00000000733	Fyn	ENSRNOT00000000733.1	ENSRNOT00000000733.0	0.28	0.85	0.56	-3.13	3.50	0.37	8.13E-15	1579.90	1222.63	106.97	11.41
ENSRNOT00000023017	B2m	ENSRNOT00000023017.1	ENSRNOT00000023017.0	0.38	0.86	0.48	-3.65	3.53	-0.13	0.00E+00	8295.45	8842.73	2173.43	313.03
ENSRNOT00000008427	Srsf6	ENSRNOT00000008427.1	ENSRNOT00000008427.0	0.17	0.94	0.77	-2.91	4.64	1.74	1.50E-35	15403.84	4618.69	653.23	36.36
ENSRNOT00000068745	Chn1	ENSRNOT00000068745.1	ENSRNOT00000068745.0	0.24	0.32	0.09	-2.31	-1.06	-3.37	2.75E-82	1096.26	11379.70	325.35	709.60
ENSRNOT00000028893	Trmt6	ENSRNOT00000028893.1	ENSRNOT00000028893.0	0.41	0.64	0.23	-3.86	2022-09-02	-1.77	6.55E-117	1648.99	5658.38	255.35	35.35
ENSRNOT00000011666	Gatad1	ENSRNOT00000011666.1	ENSRNOT00000011666.0	0.59	0.98	0.39	-6.12	5.45	-0.67	1.98E-280	1777.58	2847-07-01	858.79	15.86
ENSRNOT00000039017	Capza2	ENSRNOT00000039017.1	ENSRNOT00000039017.0	0.40	0.60	0.21	-2.57	0.63	-1.94	1.55E-158	7974.44	30495.66	577.68	351.11
ENSRNOT00000015808	Mtpn	ENSRNOT00000015808.1	ENSRNOT00000015808.0	0.36	0.47	0.11	-2.69	-0.37	-3.06	1.70E-11	2493.54	20807.58	55.45	134.24
ENSRNOT00000012021	Mrpl35	ENSRNOT00000012021.1	ENSRNOT00000012021.0	0.17	0.80	0.63	-2.07	2.84	0.77	6.75E-36	5423.23	3136.36	313.54	2022-12-22
ENSRNOT00000065926	Lyrm2	ENSRNOT00000065926.1	ENSRNOT00000065926.0	0.52	0.71	0.20	-4.23	2.21	-2.02	4.97E-73	292.42	1180.30	293.33	143.43
ENSRNOT00000011508	Atp6v1g1	ENSRNOT00000011508.1	ENSRNOT00000011508.0	0.31	0.44	0.13	-2.35	-0.38	-2.74	1.03E-295	13644.95	91047.37	1190.81	1695.56
ENSRNOT00000009678	Mrpl50	ENSRNOT00000009678.1	ENSRNOT00000009678.0	0.34	1.00	0.66	-4.21	5.15	0.94	8.27E-20	649.70	336.77	129.29	0.91
ENSRNOT00000020722	Pole3	ENSRNOT00000020722.1	ENSRNOT00000020722.0	0.61	0.99	0.38	-6.50	5.80	-0.71	3.29E-91	477.88	781.11	271.92	2022-03-03
ENSRNOT00000015961	Faah	ENSRNOT00000015961.1	ENSRNOT00000015961.0	0.24	0.89	0.64	-1.95	2.80	0.85	9.74E-03	1090.10	602.02	29.29	2022-04-04
ENSRNOT00000019620	Rer1	ENSRNOT00000019620.1	ENSRNOT00000019620.0	0.17	0.54	0.38	-1.01	0.28	-0.72	6.31E-45	4623-03-01	7640.51	406.97	200.40
ENSRNOT00000035362	Ypel5	ENSRNOT00000035362.1	ENSRNOT00000035362.0	0.22	0.91	0.69	-2.15	3.29	1.14	2.37E-24	8319.80	3792.53	282.32	20.20
ENSRNOT00000013043	Nampt	ENSRNOT00000013043.1	ENSRNOT00000013043.0	0.35	0.91	0.56	-2.91	3.25	0.34	3.55E-77	6345.56	5023.13	570.30	59.19
ENSRNOT00000010753	Psma3	ENSRNOT00000010753.1	ENSRNOT00000010753.0	0.36	0.92	0.56	-3.43	3.80	0.37	4.63E-44	5214.75	3996.16	337.37	36.36
ENSRNOT00000051239	Rasgrp3	ENSRNOT00000051239.1	ENSRNOT00000051239.0	0.27	1.00	0.73	-2.23	3.66	1.42	3.53E-03	159.70	58.08	23.23	0.00
ENSRNOT00000007607	Yipf4	ENSRNOT00000007607.1	ENSRNOT00000007607.0	0.30	0.78	0.48	-2.75	2.66	-0.09	1.19E-50	14281.01	15272.02	370.30	75.05
ENSRNOT00000073689	Pros1	ENSRNOT00000073689.1	ENSRNOT00000073689.0	0.29	0.93	0.64	-2.83	3.66	0.83	6.47E-12	2444.55	1408.59	79.70	2.63
ENSRNOT00000041325	Atcay	ENSRNOT00000041325.1	ENSRNOT00000041325.0	0.37	0.86	0.49	-2.36	2.29	-0.07	5.45E-08	487.68	512.63	51.41	2022-09-09
ENSRNOT00000015869	R3hdm4	ENSRNOT00000015869.1	ENSRNOT00000015869.0	0.21	0.66	0.45	-1.23	0.95	-0.28	1.47E-27	701.11	853.23	833.03	430.91
ENSRNOT00000038612	Aco2	ENSRNOT00000038612.1	ENSRNOT00000038612.0	0.21	0.82	0.61	-1.72	2.36	0.64	3.77E-33	9548-08-01	6114.85	956.87	271.82
ENSRNOT00000002638	Scyl2	ENSRNOT00000002638.1	ENSRNOT00000002638.0	0.20	0.62	0.42	-1.15	0.68	-0.47	8.60E-08	2757.47	3836.77	103.03	57.58
ENSRNOT00000064700	Cyb5r3	ENSRNOT00000064700.1	ENSRNOT00000064700.0	0.16	0.47	0.30	-1.01	-0.19	-1.19	6.49E-06	996.16	2282-12-01	83.74	90.71
ENSRNOT00000006621	Yaf2	ENSRNOT00000006621.1	ENSRNOT00000006621.0	0.33	0.72	0.39	-2.04	1.36	-0.67	1.27E-178	7137.78	11376.67	1373.33	515.35
ENSRNOT00000055271	Ppp1r1a	ENSRNOT00000055271.1	ENSRNOT00000055271.0	0.76	0.96	0.19	-5.71	3.61	-2.10	1.98E-21	107.27	439.19	35.05	2022-01-01
ENSRNOT00000027520	Slc25a20	ENSRNOT00000027520.1	ENSRNOT00000027520.0	0.26	0.73	0.48	-3.35	3.21	-0.14	3.16E-40	4382-02-01	4833.74	215.66	27.17
ENSRNOT00000015598	Rab11a	ENSRNOT00000015598.1	ENSRNOT00000015598.0	0.20	0.74	0.54	-1.54	1.77	0.23	5.11E-52	11820.91	10080.20	764.65	215.35
ENSRNOT00000022550	Gnai2	ENSRNOT00000022550.1	ENSRNOT00000022550.0	0.45	0.75	0.30	-2.83	1.58	-1.25	6.07E-73	780.40	1760.40	305.15	78.79
ENSRNOT00000064114	Higd1a	ENSRNOT00000064114.1	ENSRNOT00000064114.0	0.28	0.46	0.18	-2.00	-0.23	-2.23	5.06E-22	2570.61	11905.96	117.88	150.40
ENSRNOT00000018293	Lancl1	ENSRNOT00000018293.1	ENSRNOT00000018293.0	0.43	0.62	0.19	-2.78	0.64	-2.14	3.45E-32	2211-11-01	9680.51	110.00	77.68
ENSRNOT00000022089	Ndufa10	ENSRNOT00000022089.1	ENSRNOT00000022089.0	0.18	0.99	0.81	-4.58	6.71	2.13	5.33E-121	10602.32	2425.66	1778.99	15.96
ENSRNOT00000061455	Ube2a	ENSRNOT00000061455.1	ENSRNOT00000061455.0	0.35	0.59	0.24	-2.45	0.76	-1.69	2.28E-48	1794.14	5821-01-01	144.65	49.49
ENSRNOT00000064309	Cdk16	ENSRNOT00000064309.1	ENSRNOT00000064309.0	0.25	0.95	0.71	-3.15	4.41	1.26	7.46E-39	1944.75	810.91	471.92	22.93
ENSRNOT00000016455	Mesdc1	ENSRNOT00000016455.2	ENSRNOT00000016455.4	0.25	0.86	0.60	-2.08	2.70	0.61	7.62E-07	3407-07-01	2214.14	63.03	2022-08-08
ENSRNOT00000021671	Parva	ENSRNOT00000021671.3	ENSRNOT00000021671.4	0.37	0.94	0.56	-3.48	3.87	0.39	2.30E-63	2250.30	1725.66	407.98	25.25
ENSRNOT00000021671	Parva	ENSRNOT00000021671.3	ENSRNOT00000021671.6	0.17	0.21	0.04	-2.63	-1.90	-4.52	8.70E-158	2250.30	53396.77	407.98	1475.05
ENSRNOT00000021763	Snrpn	ENSRNOT00000021763.0	ENSRNOT00000021763.2	0.16	1.00	0.83	-5.11	7.42	2.31	7.08E-73	9428.79	1905.15	1087.58	2022-05-05
ENSRNOT00000025782	Eif3c	ENSRNOT00000025782.0	ENSRNOT00000025782.5	0.29	0.94	0.64	-3.11	3.99	0.88	1.57E-15	10876.57	6058.99	176.67	20.00
ENSRNOT00000027351	Nt5c2	ENSRNOT00000027351.1	ENSRNOT00000027351.4	0.45	0.74	0.28	-3.07	1.73	-1.34	5.54E-09	1018.89	2573.94	37.07	17.17
ENSRNOT00000028028	Sdhaf2	ENSRNOT00000028028.1	ENSRNOT00000028028.4	0.16	0.32	0.15	-1.33	-1.13	-2.46	2.96E-23	1358.38	7489.19	133.03	213.03
ENSRNOT00000028028	Sdhaf2	ENSRNOT00000028028.1	ENSRNOT00000028028.9	0.24	0.84	0.59	-2.91	3.46	0.54	2.15E-21	1358.38	932.02	133.03	2022-06-06
ENSRNOT00000046311	RGD1307262	ENSRNOT00000046311.0	ENSRNOT00000046311.3	0.21	0.97	0.76	-2.73	4.37	1.64	1.13E-08	1241.72	396.26	95.76	2022-02-02
ENSRNOT00000051254	Naa10	ENSRNOT00000051254.0	ENSRNOT00000051254.4	0.38	0.94	0.56	-3.71	2022-05-04	0.34	3.93E-12	260.10	205.86	67.68	2022-03-03
ENSRNOT00000056024	Svip	ENSRNOT00000056024.2	ENSRNOT00000056024.4	0.80	0.96	0.16	-7.48	2022-09-05	-2.39	0.00E+00	1356.87	7097.27	874.55	35.35
ENSRNOT00000058943	LOC100362069	ENSRNOT00000058943.0	ENSRNOT00000058943.3	0.26	1.00	0.74	-5.80	7.33	1.53	1.91E-34	667.98	230.10	325.35	0.00
ENSRNOT00000040865	Mprip	ENSRNOT00000040865.1	ENSRNOT00000040865.4	0.19	0.99	0.80	-4.71	6.73	2022-02-02	5.04E-61	9668.38	2380.71	763.03	2022-05-05
ENSRNOT00000002545	Hic2	ENSRNOT00000002545.1	ENSRNOT00000002545.5	0.80	1.00	0.20	-7.10	5.14	-1.96	1.11E-39	84.75	330.10	68.69	0.00
ENSRNOT00000001327	Trappc5	ENSRNOT00000001327.0	ENSRNOT00000001327.2	0.22	0.48	0.26	-1.44	-0.07	-1.51	8.68E-23	1637.58	4647.27	108.89	64.24
ENSRNOT00000044477	Hnrnpu	ENSRNOT00000044477.1	ENSRNOT00000044477.6	0.27	0.76	0.50	-2.76	2.75	0.00	3.81E-56	14292.02	14334.55	420.61	77.68
ENSRNOT00000059807	RGD1309104	ENSRNOT00000059807.1	ENSRNOT00000059807.9	0.15	1.00	0.85	-3.29	5.79	2.50	2.19E-08	1231.62	218.08	123.64	0.00
ENSRNOT00000030485	Ube2k	ENSRNOT00000030485.2	ENSRNOT00000030485.8	0.29	0.98	0.69	-4.30	5.47	1.18	2.27E-102	10210.81	4457.88	899.49	2022-03-23
ENSRNOT00000010759	Rpl15	ENSRNOT00000010759.0	ENSRNOT00000010759.2	0.30	1.00	0.70	-6.86	2022-09-08	1.23	0.00E+00	8012.93	3414.95	2844.14	13.13
ENSRNOT00000010759	Rpl15	ENSRNOT00000010759.0	ENSRNOT00000010759.3	0.25	1.00	0.75	-6.86	8.44	1.59	2.00E-290	8012.93	2666.87	2844.14	2022-08-08
ENSRNOT00000015969	Nudt18	ENSRNOT00000015969.0	ENSRNOT00000015969.3	0.32	0.99	0.67	-5.48	6.50	2022-02-01	3.51E-48	855.35	420.00	362.02	2022-03-03
ENSRNOT00000042606	Sugt1	ENSRNOT00000042606.2	ENSRNOT00000042606.3	0.20	0.99	0.79	-4.49	6.42	1.93	1.63E-25	4886.36	1274.24	297.17	2022-02-02
ENSRNOT00000061214	RGD1306063	ENSRNOT00000061214.1	ENSRNOT00000061214.8	0.43	0.99	0.56	-5.51	5.86	0.35	1.63E-68	839.39	657.47	349.39	3.94
ENSRNOT00000024392	Agpat6	ENSRNOT00000024392.0	ENSRNOT00000024392.3	0.16	0.74	0.58	-1.84	2.29	0.46	1.44E-06	2228.79	1620.91	53.43	2022-07-07
ENSRNOT00000026039	Polb	ENSRNOT00000026039.1	ENSRNOT00000026039.2	0.72	0.98	0.26	-6.99	5.47	-1.53	6.43E-85	326.97	933.94	176.77	2022-03-03
ENSRNOT00000026742	Dph3	ENSRNOT00000026742.2	ENSRNOT00000026742.5	0.45	0.92	0.47	-4.09	3.92	-0.17	2.93E-18	798.08	881.72	84.34	2022-07-07
ENSRNOT00000036092	Zdhhc2	ENSRNOT00000036092.1	ENSRNOT00000036092.3	0.52	0.67	0.15	-3.62	2022-05-01	-2.57	1.61E-145	2203.84	12782.02	351.31	189.80
ENSRNOT00000024545	Ccny	ENSRNOT00000024545.0	ENSRNOT00000024545.4	0.37	0.95	0.58	-3.82	4.30	0.48	2.21E-56	1640.10	1182.63	335.76	2022-12-12
ENSRNOT00000050919	Aldh5a1	ENSRNOT00000050919.2	ENSRNOT00000050919.4	0.62	0.67	0.05	-5.44	1.18	-4.25	9.75E-47	35.15	717.78	89.80	80.61
ENSRNOT00000061011	Iws1	ENSRNOT00000061011.0	ENSRNOT00000061011.6	0.48	0.66	0.17	-4.36	2022-10-02	-2.27	1.45E-61	1084.34	5248.59	115.96	24.24
ENSRNOT00000051594	Znrf2	ENSRNOT00000051594.2	ENSRNOT00000051594.5	0.20	0.71	0.51	-1.28	1.33	0.05	1.71E-05	1922.83	1860.61	54.55	15.96
ENSRNOT00000009046	Rpl34	ENSRNOT00000009046.0	ENSRNOT00000009046.4	0.32	1.00	0.68	-8.43	9.51	2022-09-01	0.00E+00	5190.40	2338.18	5563.54	13.13
ENSRNOT00000015217	Ndufs4	ENSRNOT00000015217.1	ENSRNOT00000015217.5	0.46	0.95	0.49	-4.44	4.40	-0.05	1.47E-43	2002.53	2131.62	187.58	10.00
ENSRNOT00000015306	Emb	ENSRNOT00000015306.0	ENSRNOT00000015306.4	0.34	0.92	0.58	-3.10	3.54	0.45	9.68E-131	9627.68	7074.44	956.16	78.69
ENSRNOT00000015720	Stmn2	ENSRNOT00000015720.1	ENSRNOT00000015720.2	0.27	0.53	0.26	-1.69	0.18	-1.51	0.00E+00	146688.18	418929.80	17522.93	15401.41
ENSRNOT00000016329	Rps3a	ENSRNOT00000016329.0	ENSRNOT00000016329.3	0.17	1.00	0.82	-5.96	8.20	2.25	1.05E-90	4580.20	943.43	1383.43	2022-04-04
ENSRNOT00000017379	Naa15	ENSRNOT00000017379.1	ENSRNOT00000017379.5	0.87	0.97	0.10	-6.86	3.66	-3.20	4.38E-174	391.82	3609.19	212.12	13.13
ENSRNOT00000022366	Tmem167a	ENSRNOT00000022366.1	ENSRNOT00000022366.5	0.21	0.79	0.57	-1.40	1.82	0.42	5.15E-06	2269.49	1690.20	114.14	35.35
ENSRNOT00000051977	Rsrc1	ENSRNOT00000051977.2	ENSRNOT00000051977.3	0.62	0.90	0.28	-5.48	2022-12-04	-1.36	2.27E-88	923.74	2378.79	205.86	13.13
ENSRNOT00000000733	Fyn	ENSRNOT00000000733.1	ENSRNOT00000000733.2	0.29	0.91	0.62	-3.46	4.15	0.69	8.56E-15	1579.90	980.10	106.97	5.86
ENSRNOT00000064288	Lims1	ENSRNOT00000064288.1	ENSRNOT00000064288.4	0.17	0.88	0.71	-1.33	2.67	1.34	1.72E-08	726.57	264.24	175.56	2022-06-16
ENSRNOT00000076859	Fyn	ENSRNOT00000076859.0	ENSRNOT00000076859.2	0.29	0.91	0.62	-3.46	4.15	0.69	8.56E-15	1579.90	980.10	106.97	5.86
ENSRNOT00000009552	Pdhx	ENSRNOT00000009552.1	ENSRNOT00000009552.5	0.17	0.86	0.69	-1.53	2.68	1.16	9.18E-04	4723.33	2118.79	69.70	2022-11-11
ENSRNOT00000012608	Fkbp1a	ENSRNOT00000012608.1	ENSRNOT00000012608.4	0.21	0.85	0.64	-1.77	2.62	0.85	6.08E-30	12966.06	7189.90	520.71	87.78
ENSRNOT00000013445	Serinc3	ENSRNOT00000013445.0	ENSRNOT00000013445.3	0.19	0.89	0.70	-2.06	3.31	1.25	3.74E-49	41283.13	17396.87	933.23	107.27
ENSRNOT00000021176	Ppp6c	ENSRNOT00000021176.2	ENSRNOT00000021176.6	0.27	0.65	0.38	-2.24	1.51	-0.73	2.52E-23	3894.44	6441-11-01	135.25	44.44
ENSRNOT00000021176	Ppp6c	ENSRNOT00000021176.2	ENSRNOT00000021176.7	0.22	0.79	0.56	-2.33	2.70	0.37	6.58E-17	3894.44	3003.94	135.25	16.97
ENSRNOT00000030054	Sys1	ENSRNOT00000030054.2	ENSRNOT00000030054.3	0.47	0.99	0.53	-6.08	6.24	0.16	9.95E-91	1065.35	952.73	397.17	2022-03-03
ENSRNOT00000030192	Ddrgk1	ENSRNOT00000030192.0	ENSRNOT00000030192.2	0.20	0.99	0.80	-4.52	6.49	1.97	1.79E-37	3506.97	897.07	459.80	2022-03-03
ENSRNOT00000008325	Ndufa5	ENSRNOT00000008325.0	ENSRNOT00000008325.3	0.22	0.96	0.74	-3.20	4.70	1.50	4.80E-204	12311.21	4418.18	2941.62	133.33
ENSRNOT00000008873	Crbn	ENSRNOT00000008873.1	ENSRNOT00000008873.5	0.21	0.94	0.73	-2.78	4.23	1.45	9.71E-15	3569.29	1299.80	142.02	2.93
ENSRNOT00000010253	Chmp3	ENSRNOT00000010253.0	ENSRNOT00000010253.3	0.54	0.92	0.37	-4.48	3.72	-0.76	0.00E+00	10595.96	17799.70	3027.98	217.07
ENSRNOT00000013600	Brk1	ENSRNOT00000013600.1	ENSRNOT00000013600.2	0.23	0.76	0.53	-1.56	1.76	0.20	1.12E-50	12922.42	11269.09	1024.75	364.75
ENSRNOT00000038964	Tatdn2	ENSRNOT00000038964.0	ENSRNOT00000038964.2	0.41	0.92	0.51	-3.90	3.96	0.06	1.13E-17	1432.63	1364.95	96.77	2022-09-09
ENSRNOT00000038964	Tatdn2	ENSRNOT00000038964.0	ENSRNOT00000038964.5	0.57	0.87	0.30	-4.13	2.87	-1.26	1.27E-33	1432.63	3416.57	96.77	16.16
ENSRNOT00000073846	LOC689574	ENSRNOT00000073846.0	ENSRNOT00000073846.4	0.19	0.98	0.79	-3.72	5.63	1.90	2.70E-45	5210.81	1393.64	705.35	18.18
ENSRNOT00000010061	Dnaja1	ENSRNOT00000010061.1	ENSRNOT00000010061.6	0.18	0.92	0.74	-2.39	3.92	1.53	2.31E-103	55742.93	19396.36	1821.41	130.20
ENSRNOT00000019959	AI314180	ENSRNOT00000019959.1	ENSRNOT00000019959.2	0.30	0.97	0.67	-3.55	4.55	1.00	2.77E-18	3190.61	1593.84	161.21	2022-08-08
ENSRNOT00000020722	Pole3	ENSRNOT00000020722.1	ENSRNOT00000020722.3	0.81	0.98	0.17	-7.61	5.31	-2.31	3.48E-177	477.88	2412.73	271.92	5.96
ENSRNOT00000005743	Yy1	ENSRNOT00000005743.2	ENSRNOT00000005743.6	0.24	0.81	0.56	-2.40	2.76	0.36	7.37E-08	5251.92	4078.38	78.69	15.15
ENSRNOT00000006030	Eapp	ENSRNOT00000006030.0	ENSRNOT00000006030.5	0.42	0.87	0.45	-3.40	2022-10-03	-0.29	2.11E-09	1197.07	1446.16	42.32	4.95
ENSRNOT00000006030	Eapp	ENSRNOT00000006030.0	ENSRNOT00000006030.8	0.40	1.00	0.60	-3.82	4.39	0.57	3.96E-09	1197.07	800.71	42.32	0.00
ENSRNOT00000006562	Akap6	ENSRNOT00000006562.1	ENSRNOT00000006562.9	0.17	0.42	0.26	-1.10	-0.45	-1.54	1.03E-156	2939.49	8574.44	4446.16	5983.33
ENSRNOT00000011718	Cog5	ENSRNOT00000011718.2	ENSRNOT00000011718.7	0.32	1.00	0.68	-3.73	4.83	2022-10-01	2.91E-09	632.53	294.85	57.58	0.00
ENSRNOT00000005286	Nap1l1	ENSRNOT00000005286.1	ENSRNOT00000005286.3	0.44	0.55	0.11	-3.26	0.28	-2.98	1.03E-193	1978.89	15630.20	467.98	385.56
ENSRNOT00000006621	Yaf2	ENSRNOT00000006621.1	ENSRNOT00000006621.5	0.33	0.94	0.61	-3.74	4.37	0.63	1.57E-193	7137.78	4604.55	1373.33	62.42
ENSRNOT00000009425	Ndufa7	ENSRNOT00000009425.0	ENSRNOT00000009425.2	0.55	0.82	0.26	-3.60	2.13	-1.47	2.44E-65	1181.41	3286-06-01	191.72	42.42
ENSRNOT00000016520	Samm50	ENSRNOT00000016520.0	ENSRNOT00000016520.4	0.23	0.98	0.76	-4.18	5.85	1.67	5.44E-21	1339.60	412.93	236.46	2022-03-03
ENSRNOT00000024576	Abhd17a	ENSRNOT00000024576.0	ENSRNOT00000024576.4	0.24	0.77	0.53	-2.35	2.54	0.19	1.22E-11	883.84	772.53	153.23	41.41
ENSRNOT00000025925	St13	ENSRNOT00000025925.1	ENSRNOT00000025925.4	0.71	0.91	0.21	-5.83	3.89	-1.94	1.14E-175	2827.58	10792.53	364.14	56.36
ENSRNOT00000026648	Timm13	ENSRNOT00000026648.1	ENSRNOT00000026648.2	0.17	0.97	0.81	-2.09	2022-12-04	2022-04-02	1.74E-03	447.58	108.59	49.09	2022-01-01
ENSRNOT00000041325	Atcay	ENSRNOT00000041325.1	ENSRNOT00000041325.4	0.46	0.84	0.38	-3.18	2.49	-0.68	1.20E-13	487.68	784.14	51.41	2022-07-07
ENSRNOT00000013622	Cib2	ENSRNOT00000013622.2	ENSRNOT00000013622.4	0.25	0.74	0.49	-1.54	1.50	-0.04	2.94E-11	513.13	537.88	137.98	44.24
ENSRNOT00000015598	Rab11a	ENSRNOT00000015598.1	ENSRNOT00000015598.3	0.17	0.99	0.81	-4.34	6.48	2.14	2.16E-46	11820.91	2676.97	764.65	14.14
ENSRNOT00000030221	AABR06055804.1	ENSRNOT00000030221.0	ENSRNOT00000030221.4	0.29	0.69	0.41	-1.96	1.42	-0.54	7.90E-17	2661.21	3858.69	450.61	342.63
ENSRNOT00000030221	AABR06055804.1	ENSRNOT00000030221.0	ENSRNOT00000030221.5	0.44	0.85	0.41	-2.98	2.49	-0.50	2.13E-87	2661.21	3730.20	450.61	77.68
ENSRNOT00000052392	Cadm1	ENSRNOT00000052392.2	ENSRNOT00000052392.3	0.62	0.91	0.30	-4.60	3.33	-1.28	2.64E-256	3918.59	10293.54	631.21	63.33
ENSRNOT00000020420	Mrpl44	ENSRNOT00000020420.0	ENSRNOT00000020420.3	0.20	0.71	0.50	-2.83	2.85	0.02	1.46E-11	2701.92	2680.00	80.30	14.14
ENSRNOT00000005615	Prps2	ENSRNOT00000005615.1	ENSRNOT00000005615.3	0.25	0.57	0.32	-1.66	0.59	-1.08	1.90E-22	8174.65	17136.36	166.97	101.82
ENSRNOT00000038352	LOC100365902	ENSRNOT00000038352.1	ENSRNOT00000038352.5	0.26	0.98	0.72	-3.37	4.73	1.36	2.87E-10	2747.47	1066.57	90.81	2022-02-02
ENSRNOT00000058134	Eif2s3y	ENSRNOT00000058134.1	ENSRNOT00000058134.4	0.40	0.65	0.25	-3.42	1.85	-1.57	3.68E-72	2924.44	8677.17	185.15	35.35
ENSRNOT00000014602	Scamp1	ENSRNOT00000014602.1	ENSRNOT00000014602.3	0.19	0.82	0.63	-2.56	3.30	0.74	9.57E-46	12614.75	7560.30	434.85	40.20
ENSRNOT00000052051	Fbxw7	ENSRNOT00000052051.1	ENSRNOT00000052051.6	0.25	0.78	0.53	-2.29	2.45	0.16	3.87E-03	3094.14	2759.49	39.39	12.93
ENSRNOT00000010270	Zmynd19	ENSRNOT00000010270.1	ENSRNOT00000010270.3	0.38	0.98	0.60	-4.70	5.30	0.59	3.04E-80	732.53	486.16	581.01	13.13
ENSRNOT00000068745	Chn1	ENSRNOT00000068745.1	ENSRNOT00000068745.4	0.23	0.95	0.72	-3.25	4.62	1.37	1.07E-20	1096.26	423.74	325.35	21.21
ENSRNOT00000020722	Pole3	ENSRNOT00000020722.1	ENSRNOT00000020722.2	0.33	0.95	0.62	-3.39	2022-09-04	0.70	2.39E-30	477.88	291.72	271.92	2022-04-14
ENSRNOT00000013695	Eif5	ENSRNOT00000013695.1	ENSRNOT00000013695.4	0.21	0.61	0.40	-1.25	0.66	-0.59	2.31E-16	5106.16	7640.30	433.84	349.39
ENSRNOT00000017442	Lix1	ENSRNOT00000017442.0	ENSRNOT00000017442.4	0.33	0.91	0.59	-3.50	2022-02-04	0.52	3.70E-23	1974.14	1377.58	161.01	2022-01-11
ENSRNOT00000023562	Mar.05	ENSRNOT00000023562.0	ENSRNOT00000023562.3	0.25	0.82	0.58	-2.37	2.81	0.45	3.11E-04	2979-09-01	2189.39	42.12	2022-08-08
ENSRNOT00000023562	Mar.05	ENSRNOT00000023562.0	ENSRNOT00000023562.7	0.20	0.86	0.66	-2.05	3.00	0.94	2.35E-03	2979-09-01	1549.09	42.12	2022-06-06
ENSRNOT00000025794	Sod2	ENSRNOT00000025794.1	ENSRNOT00000025794.6	0.22	0.67	0.45	-2.23	1.94	-0.29	2.23E-173	11409.70	14025.56	834.44	98.99
ENSRNOT00000026385	Fam103a1	ENSRNOT00000026385.0	ENSRNOT00000026385.3	0.18	1.00	0.81	-4.94	7.27	2.33	3.22E-55	2487.88	633.23	719.49	2022-04-04
ENSRNOT00000040740	Zfyve27	ENSRNOT00000040740.1	ENSRNOT00000040740.5	0.35	0.91	0.55	-2.98	3.30	0.31	3.63E-16	3543.13	2841.92	111.72	2022-12-12
ENSRNOT00000067822	Pank1	ENSRNOT00000067822.0	ENSRNOT00000067822.5	0.36	1.00	0.64	-4.04	4.88	0.85	3.47E-14	671.21	372.42	78.28	0.00
ENSRNOT00000029674	Gnptg	ENSRNOT00000029674.0	ENSRNOT00000029674.3	0.22	0.99	0.77	-3.65	5.36	1.71	1.21E-15	1633.64	501.92	178.69	2.63
ENSRNOT00000001467	Denr	ENSRNOT00000001467.0	ENSRNOT00000001467.5	0.18	0.64	0.46	-2.87	2.64	-0.23	6.26E-19	3427.17	3947.88	229.09	87.88
ENSRNOT00000059807	RGD1309104	ENSRNOT00000059807.1	ENSRNOT00000059807.6	0.41	0.86	0.45	-3.75	3.43	-0.32	1.10E-27	1231.62	1533.84	123.64	13.13
ENSRNOT00000067135	Rgl1	ENSRNOT00000067135.1	ENSRNOT00000067135.3	0.80	0.95	0.15	-6.39	3.89	-2.50	2.08E-37	90.71	510.00	57.58	2022-03-03
ENSRNOT00000020608	Rufy3	ENSRNOT00000020608.0	ENSRNOT00000020608.4	0.24	0.98	0.75	-4.69	6.25	1.56	5.35E-149	6525.76	2227-07-01	1612.02	23.23
ENSRNOT00000020608	Rufy3	ENSRNOT00000020608.0	ENSRNOT00000020608.5	0.55	0.64	0.09	-4.21	0.86	-3.35	0.00E+00	6525.76	66717.58	1612.02	973.33
ENSRNOT00000045050	Fip1l1	ENSRNOT00000045050.0	ENSRNOT00000045050.4	0.35	0.64	0.28	-3.35	2022-01-02	-1.34	8.45E-72	2222-12-01	5633.94	197.78	30.91
ENSRNOT00000056855	Ahsa2	ENSRNOT00000056855.1	ENSRNOT00000056855.5	0.41	0.99	0.58	-4.85	5.33	0.48	1.71E-21	328.18	237.07	112.02	2022-01-01
ENSRNOT00000013324	Esd	ENSRNOT00000013324.0	ENSRNOT00000013324.2	0.18	0.99	0.82	-4.72	6.89	2.17	4.30E-28	1548.38	334.14	418.38	2022-02-02
ENSRNOT00000020419	Spryd7	ENSRNOT00000020419.1	ENSRNOT00000020419.5	0.21	0.97	0.76	-3.53	5.21	1.68	2.66E-66	7227.78	2281.82	808.38	18.18
ENSRNOT00000063807	Mapk1ip1l	ENSRNOT00000063807.0	ENSRNOT00000063807.4	0.25	0.55	0.30	-1.54	0.32	-1.22	3.20E-39	2563.23	5980-10-01	237.58	131.82
ENSRNOT00000026742	Dph3	ENSRNOT00000026742.2	ENSRNOT00000026742.3	0.37	0.97	0.59	-3.60	4.16	0.56	4.79E-14	798.08	532.22	84.34	2.93
ENSRNOT00000026187	Gata3	ENSRNOT00000026187.2	ENSRNOT00000026187.4	0.20	0.57	0.36	-1.33	0.52	-0.81	2.55E-18	15225.25	26593.33	238.18	170.10
ENSRNOT00000044662	Lgals8	ENSRNOT00000044662.1	ENSRNOT00000044662.2	0.40	0.51	0.11	-3.22	0.24	-2.98	5.27E-26	586.57	4616.46	128.08	263.33
ENSRNOT00000025510	Txnl1	ENSRNOT00000025510.0	ENSRNOT00000025510.2	0.26	0.87	0.61	-2.08	2.74	0.65	1.29E-46	3860.20	2463-03-01	676.46	112.02
ENSRNOT00000052051	Fbxw7	ENSRNOT00000052051.1	ENSRNOT00000052051.5	0.27	0.82	0.56	-2.37	2.70	0.33	8.04E-04	3094.14	2457.17	39.39	8.89
ENSRNOT00000010270	Zmynd19	ENSRNOT00000010270.1	ENSRNOT00000010270.4	0.23	1.00	0.77	-5.70	7.41	1.71	1.63E-46	732.53	222.22	581.01	1.92
ENSRNOT00000011748	Gdap1l1	ENSRNOT00000011748.0	ENSRNOT00000011748.3	0.33	0.94	0.60	-3.08	3.68	0.61	5.80E-19	1256.77	824.04	152.32	2022-12-12
ENSRNOT00000014604	Braf	ENSRNOT00000014604.0	ENSRNOT00000014604.2	0.45	1.00	0.55	-5.99	6.31	0.32	6.54E-31	119.19	96.67	180.71	0.00
ENSRNOT00000014604	Braf	ENSRNOT00000014604.0	ENSRNOT00000014604.5	0.81	0.85	0.04	-7.78	3.24	-4.54	7.20E-184	119.19	2778.89	180.71	20.00
ENSRNOT00000003834	Rbm25	ENSRNOT00000003834.1	ENSRNOT00000003834.3	0.26	0.77	0.51	-1.64	1.70	0.06	1.27E-69	5686-06-01	5452.83	862.42	240.40
ENSRNOT00000006321	Jkamp	ENSRNOT00000006321.0	ENSRNOT00000006321.5	0.25	0.77	0.52	-2.21	2.32	0.11	1.99E-92	10565.45	9769.60	788.38	144.34
ENSRNOT00000008954	Cox16	ENSRNOT00000008954.1	ENSRNOT00000008954.3	0.20	0.74	0.55	-2.56	2.82	0.26	3.70E-15	2434.75	2005.15	113.74	15.15
ENSRNOT00000009401	Itgb1bp1	ENSRNOT00000009401.0	ENSRNOT00000009401.2	0.17	1.00	0.83	-2.03	4.33	2.30	4.30E-04	2083.43	421.62	51.52	0.00
ENSRNOT00000010586	Cgref1	ENSRNOT00000010586.0	ENSRNOT00000010586.6	0.28	0.94	0.66	-2.74	3.71	0.98	9.16E-06	557.58	281.01	45.45	2022-02-02
ENSRNOT00000035362	Ypel5	ENSRNOT00000035362.1	ENSRNOT00000035362.2	0.27	0.91	0.64	-2.81	3.62	0.81	3.19E-36	8319.80	4769.80	282.32	2022-05-15
ENSRNOT00000008062	Aasdhppt	ENSRNOT00000008062.0	ENSRNOT00000008062.3	0.48	0.86	0.39	-3.27	2.60	-0.67	3.05E-22	2624.85	4121-11-01	98.69	19.29
ENSRNOT00000014124	Tmod2	ENSRNOT00000014124.0	ENSRNOT00000014124.7	0.48	0.99	0.51	-5.75	5.83	0.08	1.54E-41	238.79	229.90	189.09	2022-01-01
ENSRNOT00000014124	Tmod2	ENSRNOT00000014124.0	ENSRNOT00000014124.8	0.66	0.76	0.10	-5.57	2.31	-3.26	3.22E-126	238.79	2248.69	189.09	40.00
ENSRNOT00000015240	Uba5	ENSRNOT00000015240.0	ENSRNOT00000015240.3	0.32	0.83	0.51	-3.16	3.24	0.08	7.80E-21	2808.38	2655-05-01	108.69	8.99
ENSRNOT00000030221	AABR06055804.1	ENSRNOT00000030221.0	ENSRNOT00000030221.7	0.37	0.96	0.60	-5.35	5.91	0.56	2.58E-78	2661.21	1791.72	450.61	2022-10-10
ENSRNOT00000050191	Lrrfip1	ENSRNOT00000050191.0	ENSRNOT00000050191.3	0.33	0.72	0.38	-2.99	2.31	-0.68	1.03E-39	3207.17	5130-10-01	161.62	26.26
ENSRNOT00000004010	Mapk9	ENSRNOT00000004010.1	ENSRNOT00000004010.5	0.56	0.93	0.36	-4.35	3.54	-0.81	1.81E-15	658.59	1146.97	42.42	2022-02-02
ENSRNOT00000075200	LOC257642	ENSRNOT00000075200.4	ENSRNOT00000075200.7	0.20	0.91	0.71	-2.24	3.56	1.32	2.83E-04	689.49	289.49	74.14	2022-09-09
ENSRNOT00000061151	CELF4	ENSRNOT00000061151.5	ENSRNOT00000061151.9	0.16	0.70	0.54	-2.05	2.29	0.24	8.61E-14	6330.71	5485.66	151.31	36.36
ENSRNOT00000003136	Phox2b	ENSRNOT00000003136.2	ENSRNOT00000003136.3	0.36	0.60	0.24	-2.35	0.62	-1.73	2.40E-57	3060.00	9967.68	197.68	87.78
ENSRNOT00000067141	LOC100363716	ENSRNOT00000067141.2	ENSRNOT00000067141.3	0.37	0.72	0.35	-2.27	1.36	-0.92	8.49E-35	1302.63	2471.62	244.85	111.82
ENSRNOT00000016000	Cdc37l1	ENSRNOT00000016000.0	ENSRNOT00000016000.3	0.17	0.77	0.60	-1.57	2.13	0.56	2.19E-65	3987.27	2697.88	610.20	63.64
ENSRNOT00000022726	Eef2k	ENSRNOT00000022726.1	ENSRNOT00000022726.4	0.43	0.86	0.43	-4.40	4.00	-0.41	7.12E-110	1222.63	1697.17	350.91	5.96
ENSRNOT00000027351	Nt5c2	ENSRNOT00000027351.1	ENSRNOT00000027351.2	0.45	0.71	0.26	-2.91	1.44	-1.47	1.62E-09	1018.89	2827.17	37.07	18.18
ENSRNOT00000027351	Nt5c2	ENSRNOT00000027351.1	ENSRNOT00000027351.5	0.23	0.95	0.72	-1.90	3.28	1.38	1.69E-03	1018.89	390.00	37.07	2022-02-02
ENSRNOT00000027957	G6PC	ENSRNOT00000027957.1	ENSRNOT00000027957.2	0.24	0.99	0.75	-4.15	5.73	1.58	4.98E-20	1648.99	551.11	206.77	2.73
ENSRNOT00000055062	Gna13	ENSRNOT00000055062.4	ENSRNOT00000055062.6	0.18	0.57	0.38	-1.08	0.38	-0.70	1.10E-04	1765.35	2889.60	55.56	39.29
ENSRNOT00000039997	Pcnp	ENSRNOT00000039997.2	ENSRNOT00000039997.5	0.36	0.52	0.16	-2.58	0.14	-2.44	2.46E-44	692.42	3770.40	215.76	267.58
ENSRNOT00000001467	Denr	ENSRNOT00000001467.0	ENSRNOT00000001467.2	0.19	0.62	0.43	-2.96	2.56	-0.40	6.97E-19	3427.17	4453.23	229.09	103.94
ENSRNOT00000003391	Insig2	ENSRNOT00000003391.1	ENSRNOT00000003391.3	0.28	0.90	0.62	-3.02	3.74	0.72	6.43E-09	1390.30	847.88	73.64	5.96
ENSRNOT00000008030	Nsg1	ENSRNOT00000008030.1	ENSRNOT00000008030.4	0.37	0.47	0.10	-3.03	-0.18	-3.21	0.00E+00	7083.13	66138.28	1204.95	1031.52
ENSRNOT00000071133	Gng2	ENSRNOT00000071133.2	ENSRNOT00000071133.4	0.35	0.87	0.52	-3.30	3.41	0.11	1.44E-231	5801.52	6488.38	1467.37	213.13
ENSRNOT00000018190	Rala	ENSRNOT00000018190.0	ENSRNOT00000018190.2	0.30	0.70	0.40	-3.15	2.58	-0.57	1.22E-11	2306.67	3431.92	61.31	15.15
ENSRNOT00000024781	Isca1	ENSRNOT00000024781.1	ENSRNOT00000024781.3	0.53	0.97	0.43	-4.99	4.59	-0.40	2.50E-206	1365.66	1806.87	728.38	2022-11-11
ENSRNOT00000024568	Smarca5	ENSRNOT00000024568.1	ENSRNOT00000024568.3	0.15	0.88	0.73	-2.89	4.29	1.40	6.28E-37	6440-10-01	2443.23	412.02	2022-05-15
ENSRNOT00000051594	Znrf2	ENSRNOT00000051594.2	ENSRNOT00000051594.3	0.25	0.42	0.18	-1.73	-0.48	-2.21	2.03E-12	1922.83	8834.75	54.55	60.51
ENSRNOT00000051594	Znrf2	ENSRNOT00000051594.2	ENSRNOT00000051594.6	0.22	0.63	0.41	-1.29	0.77	-0.52	2.83E-06	1922.83	2743.43	54.55	25.25
ENSRNOT00000017579	Metap1	ENSRNOT00000017579.1	ENSRNOT00000017579.2	0.25	0.67	0.42	-1.51	2022-03-01	-0.48	1.73E-04	1224.55	1701.11	39.19	17.98
ENSRNOT00000011748	Gdap1l1	ENSRNOT00000011748.0	ENSRNOT00000011748.4	0.35	0.90	0.55	-2.78	2022-04-03	0.27	7.21E-22	1256.77	1047.78	152.32	16.16
ENSRNOT00000016220	Mapre1	ENSRNOT00000016220.1	ENSRNOT00000016220.6	0.31	0.99	0.68	-4.83	5.91	2022-08-01	1.78E-54	5227.88	2465.96	415.05	2022-08-08
ENSRNOT00000044595	Lrrc4c	ENSRNOT00000044595.1	ENSRNOT00000044595.2	0.16	0.97	0.80	-2.62	4.63	2022-01-02	5.79E-10	2598.48	642.63	185.86	2022-07-07
ENSRNOT00000010753	Psma3	ENSRNOT00000010753.1	ENSRNOT00000010753.2	0.15	0.79	0.63	-1.39	2.19	0.80	1.08E-11	5214.75	2965.96	337.37	85.05
ENSRNOT00000038448	Srsf7	ENSRNOT00000038448.0	ENSRNOT00000038448.2	0.38	0.82	0.44	-3.83	3.48	-0.35	9.44E-20	3089.49	3845.66	91.82	2022-12-12
ENSRNOT00000006393	Rims2	ENSRNOT00000006393.1	ENSRNOT00000006393.5	0.22	0.99	0.76	-4.47	2022-11-06	1.64	1.42E-16	153.33	47.78	310.91	2022-04-04
ENSRNOT00000055289	Cbx5	ENSRNOT00000055289.1	ENSRNOT00000055289.7	0.31	0.99	0.68	-5.93	2022-02-07	2022-10-01	8.53E-87	2822.42	1312.63	637.47	2022-05-05
ENSRNOT00000014124	Tmod2	ENSRNOT00000014124.0	ENSRNOT00000014124.4	0.41	0.90	0.49	-4.61	4.53	-0.08	1.78E-39	238.79	300.20	189.09	2022-11-11
ENSRNOT00000041548	Rbms3	ENSRNOT00000041548.2	ENSRNOT00000041548.3	0.34	0.39	0.05	-3.29	-1.01	-4.30	1.24E-49	302.83	6555.25	115.96	309.60
ENSRNOT00000041548	Rbms3	ENSRNOT00000041548.2	ENSRNOT00000041548.5	0.47	0.99	0.52	-5.15	5.28	0.13	1.37E-26	302.83	274.04	115.96	0.91
ENSRNOT00000041548	Rbms3	ENSRNOT00000041548.2	ENSRNOT00000041548.6	0.39	0.69	0.30	-3.01	1.77	-1.24	2.41E-07	302.83	713.33	115.96	122.53
ENSRNOT00000052392	Cadm1	ENSRNOT00000052392.2	ENSRNOT00000052392.4	0.50	0.73	0.23	-3.47	1.73	-1.74	5.29E-207	3918.59	13027.98	631.21	211.01
ENSRNOT00000064114	Higd1a	ENSRNOT00000064114.1	ENSRNOT00000064114.2	0.32	0.55	0.23	-2.06	0.30	-1.77	8.91E-22	2570.61	8616.87	117.88	100.00
ENSRNOT00000018293	Lancl1	ENSRNOT00000018293.1	ENSRNOT00000018293.2	0.20	0.94	0.74	-1.85	3.38	1.53	2.65E-07	2211-11-01	762.32	110.00	2022-07-07
ENSRNOT00000061455	Ube2a	ENSRNOT00000061455.1	ENSRNOT00000061455.2	0.38	0.67	0.29	-3.27	2.00	-1.27	9.84E-49	1794.14	4330.91	144.65	26.26
ENSRNOT00000016000	Cdc37l1	ENSRNOT00000016000.0	ENSRNOT00000016000.4	0.26	0.65	0.38	-1.67	0.99	-0.68	1.76E-103	3987.27	6374.75	610.20	171.41
ENSRNOT00000065229	Sep.08	ENSRNOT00000065229.1	ENSRNOT00000065229.5	0.31	0.50	0.19	-2.13	0.00	-2.13	3.92E-180	2132.93	9332.42	558.48	288.28
ENSRNOT00000046053	AABR06087686.1	ENSRNOT00000046053.1	ENSRNOT00000046053.3	0.22	0.89	0.67	-2.02	2022-05-03	2022-03-01	2.10E-39	4060.81	1996.57	622.73	72.02
ENSRNOT00000018190	Rala	ENSRNOT00000018190.0	ENSRNOT00000018190.3	0.24	0.36	0.12	-1.79	-1.06	-2.85	5.19E-15	2306.67	16576.36	61.31	105.76
ENSRNOT00000056151	Serf2	ENSRNOT00000056151.0	ENSRNOT00000056151.4	0.55	0.97	0.42	-5.23	4.77	-0.46	2.22E-94	1499.60	2045.66	325.15	2022-02-12
ENSRNOT00000010338	Vgll4	ENSRNOT00000010338.0	ENSRNOT00000010338.3	0.60	0.99	0.39	-5.54	4.89	-0.65	4.54E-36	244.95	388.89	108.59	2022-02-02
ENSRNOT00000011408	Ssbp3	ENSRNOT00000011408.0	ENSRNOT00000011408.3	0.49	0.92	0.43	-3.69	3.28	-0.41	5.68E-13	2228.38	2826.97	57.17	2022-07-07
ENSRNOT00000028331	Frmd8	ENSRNOT00000028331.0	ENSRNOT00000028331.8	0.20	0.92	0.72	-1.63	2022-02-03	1.39	5.52E-18	21310.00	8300.91	295.76	26.16
ENSRNOT00000057138	Mto1	ENSRNOT00000057138.2	ENSRNOT00000057138.4	0.40	0.79	0.39	-4.05	3.43	-0.62	1.20E-23	1034.85	1576.67	288.48	148.79
ENSRNOT00000057138	Mto1	ENSRNOT00000057138.2	ENSRNOT00000057138.6	0.35	0.50	0.15	-2.46	-0.01	-2.48	9.54E-42	1034.85	5666-06-01	288.48	486.97
ENSRNOT00000056024	Svip	ENSRNOT00000056024.2	ENSRNOT00000056024.3	0.64	0.98	0.34	-6.42	5.46	-0.96	0.00E+00	1356.87	2620.00	874.55	2022-10-20
ENSRNOT00000056024	Svip	ENSRNOT00000056024.2	ENSRNOT00000056024.5	0.18	1.00	0.82	-5.83	7.97	2.14	2.17E-56	1356.87	304.65	874.55	2022-02-02
ENSRNOT00000058943	LOC100362069	ENSRNOT00000058943.0	ENSRNOT00000058943.5	0.22	1.00	0.78	-5.56	7.33	1.78	1.27E-29	667.98	194.14	325.35	0.00
ENSRNOT00000071028	LOC681193	ENSRNOT00000071028.2	ENSRNOT00000071028.3	0.22	1.00	0.78	-4.96	6.79	1.83	3.73E-20	512.32	141.01	229.60	0.00
ENSRNOT00000004010	Mapk9	ENSRNOT00000004010.1	ENSRNOT00000004010.6	0.52	0.96	0.44	-4.16	3.84	-0.32	4.09E-13	658.59	819.80	42.42	2022-01-01
ENSRNOT00000004202	Fopnl	ENSRNOT00000004202.1	ENSRNOT00000004202.5	0.30	0.97	0.66	-2.68	3.66	0.98	8.80E-05	291.72	147.07	34.34	2022-01-01
ENSRNOT00000019919	Med31	ENSRNOT00000019919.0	ENSRNOT00000019919.5	0.19	1.00	0.81	-3.92	2022-04-06	2022-12-02	2.73E-11	1511.01	343.94	132.32	0.00
ENSRNOT00000029674	Gnptg	ENSRNOT00000029674.0	ENSRNOT00000029674.5	0.39	0.97	0.59	-4.20	4.70	0.50	5.56E-29	1633.64	1146.26	178.69	2022-08-08
ENSRNOT00000054965	Mrpl12	ENSRNOT00000054965.0	ENSRNOT00000054965.4	0.26	0.97	0.71	-3.11	4.38	1.27	6.73E-11	1125.86	467.27	101.01	2022-03-03
ENSRNOT00000067317	Fbxl20	ENSRNOT00000067317.5	ENSRNOT00000067317.7	0.21	0.84	0.63	-2.41	3.18	0.77	2.06E-61	2455.25	1436.26	460.40	18.18
ENSRNOT00000043365	Pigx	ENSRNOT00000043365.0	ENSRNOT00000043365.4	0.83	0.92	0.09	-6.65	3.26	-3.38	1.77E-29	53.54	562.02	34.24	2022-02-02
ENSRNOT00000043365	Pigx	ENSRNOT00000043365.0	ENSRNOT00000043365.5	0.69	1.00	0.31	-5.22	2022-06-04	-1.16	1.25E-14	53.54	118.99	34.24	0.00
ENSRNOT00000001211	Asl	ENSRNOT00000001211.0	ENSRNOT00000001211.4	0.19	1.00	0.81	-3.36	5.42	2022-07-02	3.64E-12	1559.80	375.15	154.95	2022-01-01
ENSRNOT00000001417	Rac1	ENSRNOT00000001417.0	ENSRNOT00000001417.3	0.23	0.39	0.16	-1.35	-1.03	-2.38	6.87E-46	2600.00	13510.20	178.69	185.45
ENSRNOT00000036606	Asmtl	ENSRNOT00000036606.0	ENSRNOT00000036606.4	0.32	0.99	0.67	-4.60	5.67	2022-07-01	1.91E-20	448.48	217.27	147.27	2022-01-01
ENSRNOT00000006154	Cox20	ENSRNOT00000006154.1	ENSRNOT00000006154.7	0.17	1.00	0.83	-5.18	7.53	2.35	2.62E-73	3927.68	795.56	1262.73	8.79
ENSRNOT00000012530	Dnajc15	ENSRNOT00000012530.0	ENSRNOT00000012530.3	0.60	0.96	0.36	-5.75	4.89	-0.86	5.52E-85	1168.59	2088-08-01	258.28	16.16
ENSRNOT00000012530	Dnajc15	ENSRNOT00000012530.0	ENSRNOT00000012530.5	0.24	1.00	0.76	-5.21	6.94	1.73	4.07E-26	1168.59	346.26	258.28	0.00
ENSRNOT00000020419	Spryd7	ENSRNOT00000020419.1	ENSRNOT00000020419.8	0.24	0.99	0.75	-5.30	6.93	1.63	1.03E-79	7227.78	2348.59	808.38	7.98
ENSRNOT00000063807	Mapk1ip1l	ENSRNOT00000063807.0	ENSRNOT00000063807.6	0.32	0.75	0.43	-4.31	3.91	-0.40	3.74E-61	2563.23	3381.41	237.58	18.18
ENSRNOT00000026039	Polb	ENSRNOT00000026039.1	ENSRNOT00000026039.4	0.48	0.98	0.50	-5.45	5.47	0.01	2.39E-39	326.97	324.34	176.77	2022-03-03
ENSRNOT00000059750	Spock3	ENSRNOT00000059750.1	ENSRNOT00000059750.7	0.19	0.97	0.78	-2.81	4.66	1.84	3.89E-07	1239.60	341.72	111.92	2022-04-04
ENSRNOT00000026965	Ntpcr	ENSRNOT00000026965.1	ENSRNOT00000026965.4	0.41	0.92	0.51	-4.49	4.58	0.08	3.81E-33	1024.85	965.76	148.28	2022-05-05
ENSRNOT00000015864	Mrpl47	ENSRNOT00000015864.1	ENSRNOT00000015864.5	0.25	1.00	0.75	-4.69	6.26	1.57	1.44E-21	1165.86	400.61	180.71	0.00
ENSRNOT00000018796	Pgrmc2	ENSRNOT00000018796.1	ENSRNOT00000018796.6	0.17	1.00	0.83	-3.03	5.34	2.30	1.12E-18	2336.16	471.52	288.59	2022-02-02
ENSRNOT00000021535	Tm4sf1	ENSRNOT00000021535.2	ENSRNOT00000021535.12	0.22	0.95	0.74	-3.78	5.27	1.48	1.34E-39	8665.76	3109.49	446.77	14.14
ENSRNOT00000067113	Gria2	ENSRNOT00000067113.1	ENSRNOT00000067113.9	0.18	0.81	0.63	-2.22	3.00	0.77	8.57E-18	17979.09	10535.15	304.04	56.57
ENSRNOT00000000553	Pfdn6	ENSRNOT00000000553.0	ENSRNOT00000000553.3	0.25	0.99	0.74	-3.41	4.95	1.53	2.54E-08	385.05	130.10	84.14	0.91
ENSRNOT00000031472	Chchd10	ENSRNOT00000031472.0	ENSRNOT00000031472.2	0.17	0.98	0.81	-2.50	4.58	2022-07-02	1.35E-06	1593.64	376.57	97.68	2022-02-02
ENSRNOT00000010270	Zmynd19	ENSRNOT00000010270.1	ENSRNOT00000010270.5	0.27	1.00	0.73	-6.76	8.19	1.42	3.31E-60	732.53	272.22	581.01	0.00
ENSRNOT00000031623	Zfp133	ENSRNOT00000031623.0	ENSRNOT00000031623.3	0.77	0.99	0.23	-6.44	4.66	-1.77	3.49E-66	1772.12	6065.96	108.08	2022-11-01
ENSRNOT00000011052	Cdk5	ENSRNOT00000011052.0	ENSRNOT00000011052.3	0.54	0.94	0.40	-4.44	3.83	-0.61	2.70E-35	1140.71	1744.65	120.20	2022-09-09
ENSRNOT00000011666	Gatad1	ENSRNOT00000011666.1	ENSRNOT00000011666.4	0.30	0.74	0.44	-2.95	2.58	-0.36	2.17E-87	1777.58	2296.26	858.79	262.12
ENSRNOT00000021937	Zfp593	ENSRNOT00000021937.1	ENSRNOT00000021937.5	0.26	0.96	0.70	-3.71	4.95	1.24	5.63E-19	634.24	268.99	148.89	2022-01-01
ENSRNOT00000023411	Ccdc107	ENSRNOT00000023411.0	ENSRNOT00000023411.8	0.15	0.99	0.84	-3.17	5.53	2.35	6.99E-08	720.81	139.39	128.89	2022-01-01
ENSRNOT00000041753	LOC100364191	ENSRNOT00000041753.0	ENSRNOT00000041753.3	0.68	1.00	0.32	-4.84	3.80	-1.05	8.58E-11	34.55	74.75	25.86	0.00
ENSRNOT00000061786	Eif3h	ENSRNOT00000061786.2	ENSRNOT00000061786.3	0.49	0.87	0.38	-4.13	3.43	-0.70	3.58E-17	246.97	402.42	56.26	2022-04-04
ENSRNOT00000041325	Atcay	ENSRNOT00000041325.1	ENSRNOT00000041325.5	0.49	0.70	0.21	-3.19	1.26	-1.92	1.66E-19	487.68	1855.25	51.41	18.18
ENSRNOT00000008062	Aasdhppt	ENSRNOT00000008062.0	ENSRNOT00000008062.6	0.25	0.85	0.61	-1.78	2.42	0.63	2.73E-08	2624.85	1678.48	98.69	16.16
ENSRNOT00000014124	Tmod2	ENSRNOT00000014124.0	ENSRNOT00000014124.10	0.26	1.00	0.74	-4.84	6.33	1.49	2.99E-18	238.79	81.82	189.09	0.00
ENSRNOT00000014605	Taf1d	ENSRNOT00000014605.0	ENSRNOT00000014605.4	0.55	1.00	0.45	-7.08	6.81	-0.26	2.17E-68	377.07	439.19	249.60	0.00
ENSRNOT00000017648	Pus3	ENSRNOT00000017648.0	ENSRNOT00000017648.3	0.19	0.99	0.80	-4.13	6.15	2022-02-02	2.15E-16	956.87	230.91	212.63	2022-01-01
ENSRNOT00000022676	Nop58	ENSRNOT00000022676.0	ENSRNOT00000022676.7	0.26	0.98	0.73	-4.28	5.71	1.43	3.02E-31	3301.62	1222.02	313.64	2022-07-07
ENSRNOT00000030761	Rpl37a	ENSRNOT00000030761.0	ENSRNOT00000030761.3	0.48	0.96	0.48	-5.81	5.68	-0.13	0.00E+00	1094.85	1180.71	5493.84	333.84
ENSRNOT00000059159	LOC685203	ENSRNOT00000059159.2	ENSRNOT00000059159.5	0.18	0.86	0.68	-1.48	2.60	2022-12-01	8.92E-09	5688-08-01	2609.29	173.54	26.26
ENSRNOT00000007015	Ebp	ENSRNOT00000007015.0	ENSRNOT00000007015.5	0.23	1.00	0.77	-6.05	7.80	1.75	5.65E-47	1751.31	533.23	458.38	0.00
ENSRNOT00000001247	Ran	ENSRNOT00000001247.0	ENSRNOT00000001247.3	0.35	0.85	0.51	-2.72	2.75	0.03	1.51E-197	36553.13	35629.09	1497.17	261.21
ENSRNOT00000026398	Etf1	ENSRNOT00000026398.1	ENSRNOT00000026398.6	0.29	0.57	0.28	-1.87	0.50	-1.37	1.41E-63	3064-04-01	7975.86	269.90	112.63
ENSRNOT00000068777	Rwdd1	ENSRNOT00000068777.0	ENSRNOT00000068777.2	0.22	0.98	0.75	-3.01	4.63	1.63	2.43E-10	2250.81	725.66	133.84	2022-05-05
ENSRNOT00000016220	Mapre1	ENSRNOT00000016220.1	ENSRNOT00000016220.8	0.23	0.85	0.61	-2.50	3.17	0.67	2.00E-39	5227.88	3273.23	415.05	48.48
ENSRNOT00000006030	Eapp	ENSRNOT00000006030.0	ENSRNOT00000006030.4	0.26	0.85	0.59	-2.46	2.98	0.52	9.43E-05	1197.07	824.14	42.32	2022-06-06
ENSRNOT00000047356	Morn2	ENSRNOT00000047356.0	ENSRNOT00000047356.4	0.51	1.00	0.49	-6.33	6.30	-0.03	8.63E-39	213.84	224.65	156.46	0.00
ENSRNOT00000066593	Kidins220	ENSRNOT00000066593.1	ENSRNOT00000066593.7	0.30	0.87	0.56	-2.87	3.24	0.37	5.08E-07	4366.77	3393.23	58.38	2022-09-09
ENSRNOT00000055289	Cbx5	ENSRNOT00000055289.1	ENSRNOT00000055289.8	0.45	0.78	0.33	-2.87	1.84	-1.02	4.71E-139	2822.42	5745-05-01	637.47	177.07
ENSRNOT00000004010	Mapk9	ENSRNOT00000004010.1	ENSRNOT00000004010.10	0.15	0.18	0.03	-2.71	-2.23	-4.94	1.17E-18	658.59	20189.90	42.42	189.70
ENSRNOT00000006154	Cox20	ENSRNOT00000006154.1	ENSRNOT00000006154.5	0.19	1.00	0.80	-6.19	8.28	2022-09-02	4.20E-107	3927.68	1031.41	1262.73	2.42
ENSRNOT00000019921	Rnf152	ENSRNOT00000019921.2	ENSRNOT00000019921.6	0.67	0.69	0.02	-7.34	1.21	-6.13	6.44E-41	39.19	2971-01-01	31.31	18.18
ENSRNOT00000027345	Reep5	ENSRNOT00000027345.1	ENSRNOT00000027345.2	0.48	0.73	0.24	-3.05	1.41	-1.64	7.22E-170	4514.75	14333.64	559.09	205.76
ENSRNOT00000024120	Nip30	ENSRNOT00000024120.1	ENSRNOT00000024120.6	0.53	0.99	0.46	-5.76	5.52	-0.23	7.24E-36	343.64	435.25	118.69	0.71
ENSRNOT00000026586	Pde2a	ENSRNOT00000026586.1	ENSRNOT00000026586.4	0.22	0.99	0.77	-3.59	5.31	1.72	5.20E-08	172.22	50.00	103.84	0.71
ENSRNOT00000004111	RGD1564036	ENSRNOT00000004111.0	ENSRNOT00000004111.4	0.25	1.00	0.75	-5.42	6.95	1.53	1.04E-21	196.36	67.37	256.06	0.00
ENSRNOT00000004202	Fopnl	ENSRNOT00000004202.1	ENSRNOT00000004202.4	0.23	1.00	0.77	-2.45	4.16	1.71	6.77E-04	291.72	89.29	34.34	0.00
ENSRNOT00000057953	Kcnj12	ENSRNOT00000057953.1	ENSRNOT00000057953.5	0.21	1.00	0.79	-7.50	9.47	1.96	1.56E-107	1023.94	314.34	1426.57	0.00
ENSRNOT00000076625	Nt5c3b	ENSRNOT00000076625.0	ENSRNOT00000076625.2	0.25	0.99	0.74	-2.65	4.20	1.55	1.41E-08	395.66	140.40	81.62	2022-01-01
ENSRNOT00000042095	LOC100912059	ENSRNOT00000042095.2	ENSRNOT00000042095.5	0.83	0.96	0.14	-6.32	3.67	-2.64	2.06E-48	91.31	573.23	75.45	2022-05-05
ENSRNOT00000016098	LOC100912059	ENSRNOT00000016098.2	ENSRNOT00000016098.5	0.83	0.96	0.13	-6.34	3.67	-2.67	8.42E-49	90.30	577.17	75.45	2022-05-05
ENSRNOT00000015217	Ndufs4	ENSRNOT00000015217.1	ENSRNOT00000015217.7	0.30	0.97	0.67	-3.74	4.77	2022-04-01	9.75E-24	2002.53	1005.56	187.58	5.96
ENSRNOT00000059467	RGD1565641	ENSRNOT00000059467.0	ENSRNOT00000059467.3	0.27	1.00	0.73	-3.80	5.19	1.39	1.57E-09	120.61	45.05	89.70	0.00
ENSRNOT00000000639	Ccdc167	ENSRNOT00000000639.2	ENSRNOT00000000639.5	0.55	1.00	0.45	-4.11	3.83	-0.28	1.96E-08	108.89	126.16	26.77	0.00
ENSRNOT00000049857	Snrpb	ENSRNOT00000049857.0	ENSRNOT00000049857.3	0.23	0.80	0.57	-1.39	1.79	0.40	3.07E-03	2708.69	2047.27	43.43	2022-12-12
ENSRNOT00000013620	Mturn	ENSRNOT00000013620.1	ENSRNOT00000013620.5	0.22	0.42	0.20	-1.54	-0.46	-2.00	4.84E-49	3186.87	12850.40	300.51	345.15
ENSRNOT00000009678	Mrpl50	ENSRNOT00000009678.1	ENSRNOT00000009678.7	0.22	1.00	0.78	-3.80	5.62	1.82	2.71E-13	649.70	192.42	129.29	0.00
ENSRNOT00000065926	Lyrm2	ENSRNOT00000065926.1	ENSRNOT00000065926.4	0.22	1.00	0.78	-5.41	7.18	1.77	2.47E-23	292.42	85.76	293.33	0.00
ENSRNOT00000014605	Taf1d	ENSRNOT00000014605.0	ENSRNOT00000014605.2	0.30	1.00	0.70	-5.06	6.31	1.24	3.84E-26	377.07	146.46	249.60	2022-01-01
ENSRNOT00000020420	Mrpl44	ENSRNOT00000020420.0	ENSRNOT00000020420.4	0.17	0.79	0.63	-2.56	3.31	0.75	2.52E-09	2701.92	1622.12	80.30	2022-07-07
ENSRNOT00000073000	Slc25a23	ENSRNOT00000073000.2	ENSRNOT00000073000.5	0.18	0.75	0.57	-1.15	1.57	0.41	1.75E-08	1681.01	1266.67	207.78	69.70
ENSRNOT00000021226	Sorbs1	ENSRNOT00000021226.2	ENSRNOT00000021226.5	0.25	0.73	0.48	-2.13	2.00	-0.13	4.66E-13	3836.26	4236.36	97.27	23.13
ENSRNOT00000022726	Eef2k	ENSRNOT00000022726.1	ENSRNOT00000022726.6	0.45	0.66	0.21	-5.08	3.21	-1.87	1.83E-185	1222.63	4469.19	350.91	21.92
ENSRNOT00000024400	Ppp6r1	ENSRNOT00000024400.1	ENSRNOT00000024400.2	0.23	0.28	0.05	-2.86	-1.30	-4.16	2.06E-27	299.70	5369.29	66.36	161.62
ENSRNOT00000027753	Eif1ad	ENSRNOT00000027753.1	ENSRNOT00000027753.3	0.61	0.97	0.36	-5.80	4.97	-0.83	1.34E-77	673.43	1202.12	216.67	2022-06-06
ENSRNOT00000064254	Ap2a2	ENSRNOT00000064254.0	ENSRNOT00000064254.3	0.17	0.57	0.39	-3.25	2.62	-0.62	6.08E-20	4886.77	7545.76	259.09	155.45
ENSRNOT00000000253	Zfp207	ENSRNOT00000000253.0	ENSRNOT00000000253.10	0.38	0.77	0.40	-2.84	2.20	-0.64	3.80E-23	3181.52	5286.97	89.80	2022-05-15
ENSRNOT00000004010	Mapk9	ENSRNOT00000004010.1	ENSRNOT00000004010.8	0.23	0.26	0.03	-3.36	-1.66	-5.02	1.16E-24	658.59	21307.17	42.42	130.30
ENSRNOT00000005293	Map2k4	ENSRNOT00000005293.2	ENSRNOT00000005293.4	0.65	0.71	0.06	-5.65	1.78	-3.87	0.00E+00	3596.46	52497.98	862.53	441.62
ENSRNOT00000006230	Spop	ENSRNOT00000006230.1	ENSRNOT00000006230.4	0.34	0.57	0.23	-2.41	0.66	-1.76	1.08E-95	2186.36	7394.85	327.27	142.32
ENSRNOT00000007621	Ppp2ca	ENSRNOT00000007621.1	ENSRNOT00000007621.3	0.41	0.75	0.34	-2.60	1.63	-0.96	2.96E-54	10992.63	21477.27	308.18	124.95
ENSRNOT00000010778	Timm22	ENSRNOT00000010778.1	ENSRNOT00000010778.4	0.50	0.96	0.47	-6.64	6.43	-0.20	1.32E-254	3883.94	4491-11-01	985.15	29.29
ENSRNOT00000012279	Dynll2	ENSRNOT00000012279.1	ENSRNOT00000012279.2	0.39	0.98	0.58	-4.13	4.62	0.49	7.95E-36	1758.08	1228.18	218.99	2022-09-09
ENSRNOT00000057953	Kcnj12	ENSRNOT00000057953.1	ENSRNOT00000057953.3	0.55	0.91	0.36	-6.07	5.22	-0.86	2.90E-281	1023.94	1845.05	1426.57	180.71
ENSRNOT00000002511	Mzt2b	ENSRNOT00000002511.1	ENSRNOT00000002511.5	0.42	0.99	0.58	-4.70	5.14	0.44	2.01E-22	573.33	419.09	108.99	2022-01-01
ENSRNOT00000030031	Rab35	ENSRNOT00000030031.1	ENSRNOT00000030031.3	0.19	0.85	0.66	-1.51	2.45	0.94	1.55E-04	2004.55	1045.45	55.25	2022-07-07
ENSRNOT00000058725	Tmem248	ENSRNOT00000058725.0	ENSRNOT00000058725.2	0.35	0.90	0.54	-3.28	3.53	0.25	2.06E-10	1986.36	1676.16	74.75	2022-10-10
ENSRNOT00000067135	Rgl1	ENSRNOT00000067135.1	ENSRNOT00000067135.4	0.82	0.97	0.15	-6.66	2022-10-04	-2.56	1.96E-39	90.71	531.92	57.58	2022-02-02
ENSRNOT00000003472	Parm1	ENSRNOT00000003472.0	ENSRNOT00000003472.5	0.32	0.34	0.02	-4.58	-0.98	-5.56	3.30E-55	238.38	11287.98	70.71	166.67
ENSRNOT00000056855	Ahsa2	ENSRNOT00000056855.1	ENSRNOT00000056855.2	0.72	0.96	0.23	-5.94	4.23	-1.72	2.62E-58	328.18	1112.53	112.02	4.75
ENSRNOT00000013324	Esd	ENSRNOT00000013324.0	ENSRNOT00000013324.3	0.17	1.00	0.82	-4.94	7.18	2.24	3.29E-28	1548.38	317.88	418.38	2022-01-01
ENSRNOT00000017086	Sugt1	ENSRNOT00000017086.0	ENSRNOT00000017086.2	0.21	0.99	0.78	-4.55	6.41	1.87	1.70E-26	4688.18	1275.25	296.16	2022-02-02
ENSRNOT00000061214	RGD1306063	ENSRNOT00000061214.1	ENSRNOT00000061214.4	0.47	0.87	0.39	-3.54	2.92	-0.62	3.37E-62	839.39	1294.34	349.39	71.52
ENSRNOT00000061214	RGD1306063	ENSRNOT00000061214.1	ENSRNOT00000061214.9	0.38	0.99	0.61	-5.42	2022-05-06	0.63	1.53E-59	839.39	542.83	349.39	2022-03-03
ENSRNOT00000071133	Gng2	ENSRNOT00000071133.2	ENSRNOT00000071133.5	0.33	0.39	0.06	-3.36	-0.67	-4.03	0.00E+00	5801.52	94891.62	1467.37	2320.40
ENSRNOT00000025980	Hnrnpk	ENSRNOT00000025980.0	ENSRNOT00000025980.3	0.22	0.37	0.15	-1.60	-0.91	-2.52	1.13E-78	11295.76	64659.80	380.20	553.74
ENSRNOT00000064257	Bmi1	ENSRNOT00000064257.4	ENSRNOT00000064257.7	0.17	0.76	0.59	-2.96	3.46	0.51	4.89E-59	3287.47	2314.75	350.10	13.13
ENSRNOT00000021516	Zmat2	ENSRNOT00000021516.1	ENSRNOT00000021516.5	0.33	0.78	0.45	-3.23	2.92	-0.31	2.50E-23	2134.85	2646.46	102.83	2022-11-11
ENSRNOT00000025510	Txnl1	ENSRNOT00000025510.0	ENSRNOT00000025510.4	0.48	0.68	0.20	-3.37	1.40	-1.97	2.75E-254	3860.20	15200.40	676.46	227.47
ENSRNOT00000025510	Txnl1	ENSRNOT00000025510.0	ENSRNOT00000025510.6	0.33	0.98	0.65	-4.69	5.60	0.92	5.68E-99	3860.20	2041.82	676.46	2022-10-10
ENSRNOT00000020927	MGC116202	ENSRNOT00000020927.0	ENSRNOT00000020927.4	0.58	0.78	0.21	-3.76	1.82	-1.93	5.37E-104	2103.54	8057.98	256.16	70.71
ENSRNOT00000026965	Ntpcr	ENSRNOT00000026965.1	ENSRNOT00000026965.3	0.19	0.44	0.26	-1.21	-0.33	-1.53	1.08E-11	1024.85	2972.22	148.28	187.47
ENSRNOT00000017379	Naa15	ENSRNOT00000017379.1	ENSRNOT00000017379.4	0.43	0.72	0.29	-3.66	2.37	-1.29	8.49E-77	391.82	954.95	212.12	2022-07-17
ENSRNOT00000017379	Naa15	ENSRNOT00000017379.1	ENSRNOT00000017379.6	0.71	0.78	0.08	-5.59	2.00	-3.58	1.67E-181	391.82	4707-07-01	212.12	27.17
ENSRNOT00000017770	Sh3glb1	ENSRNOT00000017770.1	ENSRNOT00000017770.5	0.18	0.48	0.30	-1.04	-0.18	-1.22	6.80E-97	2293.43	5321-01-01	589.70	294.95
ENSRNOT00000022366	Tmem167a	ENSRNOT00000022366.1	ENSRNOT00000022366.3	0.24	0.40	0.16	-1.71	-0.64	-2.35	2.12E-19	2269.49	11536.36	114.14	175.45
ENSRNOT00000022366	Tmem167a	ENSRNOT00000022366.1	ENSRNOT00000022366.8	0.25	0.96	0.71	-3.46	4.76	1.30	1.71E-12	2269.49	916.97	114.14	2022-03-03
ENSRNOT00000028210	Ube2q1	ENSRNOT00000028210.0	ENSRNOT00000028210.2	0.27	0.77	0.50	-2.14	2.15	0.01	1.35E-08	6456.97	6424.14	80.81	2022-12-22
ENSRNOT00000040533	Srek1	ENSRNOT00000040533.2	ENSRNOT00000040533.8	0.17	0.76	0.60	-2.07	2.63	0.56	1.32E-11	1777.27	1216.87	111.92	14.65
ENSRNOT00000001779	Gnaz	ENSRNOT00000001779.2	ENSRNOT00000001779.6	0.48	0.62	0.15	-3.39	0.87	-2.52	4.08E-10	675.25	3864.24	2022-07-27	2022-02-22
ENSRNOT00000076859	Fyn	ENSRNOT00000076859.0	ENSRNOT00000076859.3	0.29	0.85	0.56	-3.27	3.62	0.35	3.82E-15	1579.90	1243.64	106.97	11.21
ENSRNOT00000023786	Eif2s2	ENSRNOT00000023786.0	ENSRNOT00000023786.4	0.29	0.57	0.28	-2.18	0.84	-1.34	3.65E-34	9813.64	24824.85	598.38	744.34
ENSRNOT00000028888	Cds2	ENSRNOT00000028888.2	ENSRNOT00000028888.8	0.18	0.43	0.25	-1.19	-0.41	-1.60	3.72E-10	1981.82	5972.73	76.46	76.67
ENSRNOT00000036251	Fnbp1	ENSRNOT00000036251.3	ENSRNOT00000036251.8	0.24	0.54	0.30	-1.80	0.59	-1.22	4.02E-108	2736.36	6376.26	476.36	163.54
ENSRNOT00000056151	Serf2	ENSRNOT00000056151.0	ENSRNOT00000056151.5	0.44	0.99	0.55	-5.98	6.30	0.32	6.12E-70	1499.60	1189.90	325.15	2022-03-03
ENSRNOT00000014604	Braf	ENSRNOT00000014604.0	ENSRNOT00000014604.3	0.45	0.54	0.08	-4.77	1.32	-3.45	3.78E-26	119.19	1305.35	180.71	501.82
ENSRNOT00000015808	Mtpn	ENSRNOT00000015808.1	ENSRNOT00000015808.2	0.26	0.84	0.58	-2.22	2.70	0.48	7.13E-06	2493.54	1795.66	55.45	9.49
ENSRNOT00000010061	Dnaja1	ENSRNOT00000010061.1	ENSRNOT00000010061.3	0.22	0.68	0.46	-1.35	2022-11-01	-0.24	1.41E-127	55742.93	65843.33	1821.41	799.39
ENSRNOT00000010061	Dnaja1	ENSRNOT00000010061.1	ENSRNOT00000010061.5	0.26	0.84	0.58	-2.50	2.98	0.48	3.81E-174	55742.93	39980.00	1821.41	276.77
ENSRNOT00000011731	Jun	ENSRNOT00000011731.2	ENSRNOT00000011731.7	0.30	0.98	0.68	-3.08	4.15	2022-07-01	1.29E-12	1122.42	528.69	115.05	4.95
ENSRNOT00000011765	Faf1	ENSRNOT00000011765.2	ENSRNOT00000011765.4	0.20	0.99	0.79	-3.86	5.76	1.89	5.45E-14	2360-10-01	639.90	153.54	2022-01-01
ENSRNOT00000018049	Sfpq	ENSRNOT00000018049.0	ENSRNOT00000018049.3	0.19	0.58	0.39	-1.36	0.71	-0.66	6.08E-20	4904.14	7731.62	185.15	90.91
ENSRNOT00000019959	AI314180	ENSRNOT00000019959.1	ENSRNOT00000019959.3	0.38	0.89	0.51	-2.82	2.90	0.08	4.00E-23	3190.61	3012.53	161.21	2022-04-24
ENSRNOT00000010300	Actr10	ENSRNOT00000010300.1	ENSRNOT00000010300.4	0.28	0.72	0.44	-1.74	1.41	-0.33	3.65E-80	8015.56	10133.43	739.19	247.37
ENSRNOT00000013043	Nampt	ENSRNOT00000013043.1	ENSRNOT00000013043.3	0.25	0.86	0.61	-2.05	2.72	0.66	7.84E-38	6345.56	4004.95	570.30	100.51
ENSRNOT00000006239	Dazap2	ENSRNOT00000006239.1	ENSRNOT00000006239.3	0.36	0.71	0.35	-2.96	2022-07-02	-0.89	1.99E-10	2706.46	4989.19	60.61	25.96
ENSRNOT00000010957	Slc48a1	ENSRNOT00000010957.1	ENSRNOT00000010957.4	0.27	0.98	0.71	-3.38	4.69	1.31	1.52E-14	1117.68	450.00	142.32	2022-04-04
ENSRNOT00000016520	Samm50	ENSRNOT00000016520.0	ENSRNOT00000016520.5	0.24	0.99	0.75	-4.73	6.35	1.63	2.79E-24	1339.60	426.77	236.46	2022-01-01
ENSRNOT00000025925	St13	ENSRNOT00000025925.1	ENSRNOT00000025925.6	0.70	0.83	0.14	-5.04	2.37	-2.67	2.04E-210	2827.58	17886.26	364.14	96.97
ENSRNOT00000055289	Cbx5	ENSRNOT00000055289.1	ENSRNOT00000055289.3	0.21	0.99	0.78	-5.11	6.91	1.80	3.58E-53	2822.42	808.38	637.47	2022-06-06
ENSRNOT00000068033	Cbx6	ENSRNOT00000068033.0	ENSRNOT00000068033.4	0.18	0.38	0.20	-1.11	-0.90	-2.02	1.93E-19	12465.66	50045.66	204.75	349.70
ENSRNOT00000010090	Rsl24d1	ENSRNOT00000010090.1	ENSRNOT00000010090.5	0.29	0.99	0.71	-4.00	5.28	1.27	2.89E-45	1690.10	700.71	380.30	2022-04-04
ENSRNOT00000013577	Panx1	ENSRNOT00000013577.1	ENSRNOT00000013577.5	0.25	0.83	0.58	-3.08	3.52	0.44	5.97E-26	2828-08-01	2093.54	154.34	2022-08-08
ENSRNOT00000014124	Tmod2	ENSRNOT00000014124.0	ENSRNOT00000014124.5	0.55	0.72	0.17	-5.72	3.42	-2.30	1.36E-74	238.79	1153.94	189.09	55.56
ENSRNOT00000014124	Tmod2	ENSRNOT00000014124.0	ENSRNOT00000014124.9	0.49	0.55	0.06	-4.49	0.36	-4.13	4.47E-124	238.79	4124.44	189.09	135.56
ENSRNOT00000015299	Tmem30a	ENSRNOT00000015299.0	ENSRNOT00000015299.4	0.22	0.63	0.40	-1.44	0.86	-0.58	2.23E-92	21435.66	32024.55	758.08	299.80
ENSRNOT00000015299	Tmem30a	ENSRNOT00000015299.0	ENSRNOT00000015299.6	0.18	0.98	0.80	-3.51	5.54	2022-03-02	7.92E-48	21435.66	5234.75	758.08	17.17
ENSRNOT00000030221	AABR06055804.1	ENSRNOT00000030221.0	ENSRNOT00000030221.8	0.42	0.52	0.10	-3.31	0.14	-3.17	3.12E-211	2661.21	23758.59	450.61	365.56
ENSRNOT00000052392	Cadm1	ENSRNOT00000052392.2	ENSRNOT00000052392.5	0.55	0.74	0.19	-3.73	1.64	-2.09	4.35E-260	3918.59	16406.87	631.21	193.43
ENSRNOT00000022676	Nop58	ENSRNOT00000022676.0	ENSRNOT00000022676.3	0.31	0.97	0.66	-3.60	4.55	0.95	1.26E-39	3301.62	1708.59	313.64	2022-11-11
ENSRNOT00000026646	EIF4E2	ENSRNOT00000026646.0	ENSRNOT00000026646.5	0.29	0.72	0.43	-2.00	1.59	-0.41	1.99E-80	10582.32	14013.74	822.12	325.35
ENSRNOT00000010135	Sms	ENSRNOT00000010135.1	ENSRNOT00000010135.3	0.33	0.86	0.53	-3.82	3.99	0.17	3.56E-22	3974.44	3535.25	142.32	2022-06-16
ENSRNOT00000058134	Eif2s3y	ENSRNOT00000058134.1	ENSRNOT00000058134.3	0.38	0.57	0.18	-3.07	0.93	-2.14	3.00E-74	2924.44	12883.54	185.15	72.73
ENSRNOT00000065814	Msl3	ENSRNOT00000065814.1	ENSRNOT00000065814.4	0.27	0.90	0.63	-3.01	3.75	0.74	3.28E-09	1350.81	807.47	68.48	2022-04-04
ENSRNOT00000006393	Rims2	ENSRNOT00000006393.1	ENSRNOT00000006393.7	0.44	0.65	0.20	-2.92	0.96	-1.96	3.13E-52	153.33	607.68	310.91	184.04
ENSRNOT00000024366	Coa5	ENSRNOT00000024366.2	ENSRNOT00000024366.6	0.62	0.70	0.08	-5.01	1.48	-3.54	0.00E+00	1281.92	14795.35	1924-04-01	862.42
ENSRNOT00000028588	Cyth2	ENSRNOT00000028588.0	ENSRNOT00000028588.3	0.20	0.96	0.76	-2.55	4.21	1.66	2.36E-06	1965-05-01	618.59	63.84	2022-01-01
ENSRNOT00000008325	Ndufa5	ENSRNOT00000008325.0	ENSRNOT00000008325.4	0.29	0.92	0.63	-3.21	3.98	0.77	5.61E-279	12311.21	7256.97	2941.62	256.16
ENSRNOT00000009503	Serbp1	ENSRNOT00000009503.1	ENSRNOT00000009503.7	0.16	0.93	0.77	-2.98	4.76	1.78	8.45E-19	11778.89	3391.31	352.32	19.19
ENSRNOT00000027272	Map2k2	ENSRNOT00000027272.0	ENSRNOT00000027272.5	0.24	0.80	0.56	-2.06	2.43	0.37	3.37E-09	4946-06-01	3837.47	88.79	16.16
ENSRNOT00000057330	Fam134a	ENSRNOT00000057330.1	ENSRNOT00000057330.4	0.20	0.60	0.40	-1.13	0.56	-0.57	2.37E-07	2671.52	3954-04-01	100.91	62.63
ENSRNOT00000046053	AABR06087686.1	ENSRNOT00000046053.1	ENSRNOT00000046053.4	0.38	0.97	0.58	-5.31	5.80	0.50	2.08E-112	4060.81	2881.82	622.73	14.95
ENSRNOT00000056151	Serf2	ENSRNOT00000056151.0	ENSRNOT00000056151.3	0.41	0.98	0.57	-4.80	5.22	0.42	9.26E-61	1499.60	1112.22	325.15	6.97
ENSRNOT00000014124	Tmod2	ENSRNOT00000014124.0	ENSRNOT00000014124.3	0.76	0.92	0.16	-6.68	4.24	-2.44	1.50E-115	238.79	1278.48	189.09	2022-09-09
ENSRNOT00000066440	Cab39	ENSRNOT00000066440.1	ENSRNOT00000066440.2	0.16	0.42	0.26	-1.03	-0.45	-1.48	1.33E-04	2872-12-01	8006.36	55.66	73.94
ENSRNOT00000023139	Ppp2r2d	ENSRNOT00000023139.0	ENSRNOT00000023139.2	0.21	0.75	0.54	-1.36	1.61	0.25	6.50E-24	2703.74	2289.90	434.85	137.37
ENSRNOT00000003473	Sap30l	ENSRNOT00000003473.2	ENSRNOT00000003473.5	0.73	0.84	0.11	-6.00	2.99	-3.01	9.67E-168	1300.40	10526.36	236.67	46.46
ENSRNOT00000067317	Fbxl20	ENSRNOT00000067317.5	ENSRNOT00000067317.6	0.21	0.87	0.67	-2.39	3.39	1.00	1.10E-53	2455.25	1225.96	460.40	16.16
ENSRNOT00000019921	Rnf152	ENSRNOT00000019921.2	ENSRNOT00000019921.5	0.85	1.00	0.15	-6.64	2022-06-04	-2.58	3.28E-23	39.19	251.62	31.31	0.00
ENSRNOT00000061214	RGD1306063	ENSRNOT00000061214.1	ENSRNOT00000061214.5	0.40	0.99	0.59	-5.45	5.95	0.50	3.40E-60	839.39	593.84	349.39	5.96
ENSRNOT00000000627	LOC100910660	ENSRNOT00000000627.1	ENSRNOT00000000627.3	0.30	0.81	0.51	-2.58	2.62	0.04	1.50E-19	6211.82	6028.18	136.26	2022-12-22
ENSRNOT00000000631	RGD735065	ENSRNOT00000000631.0	ENSRNOT00000000631.3	0.40	0.99	0.60	-5.52	2022-08-06	0.57	1.09E-54	1100.71	740.30	298.59	2022-03-03
ENSRNOT00000003834	Rbm25	ENSRNOT00000003834.1	ENSRNOT00000003834.4	0.32	0.94	0.63	-3.48	4.23	0.75	4.77E-125	5686-06-01	3383-03-01	862.42	26.87
Table S15 : Promoter-proximal shifts in NT-3 treated axons as compared to cell bodies. Columns represent: 1- Ensembl Rn5 transcript ID, 2- Rat Rn5 gene symbol, 3- promoter-proximal (Ip) 3’ UTR isoform ID, 4- promoter-distal (Id) 3’ UTR isoform ID, 5- difference in relative promoter-proximal usage between axons and cell bodies in NT-3, 6- relative promoter-proximal usage in NT-3 axons, 7- relative…
