# Supplementary material for: The predicted RNA-binding protein regulome of axonal mRNAs
Source: HighWire-hosted journal article supplement (doi:10.1101/gr.277804.123), 2023-08-15
Supplement: Supplemental_Tables.zip [file Supplemental Table S16.xlsx]

## Sheet: Sheet1
txID	geneSymbol	imIDp	uniqueID	dPUD(Ip/(Ip+Id))	mPUD.axon	mPUD.cb	dRUD(Id/Ip)	mRUD.axon	mRUD.cb	FDR	proxi.cb	dist.cb	proxi.ax	dist.ax
ENSRNOT00000046264	Haus7	ENSRNOT00000046264.1	ENSRNOT00000046264.0	-0.22	0.12	0.34	2.48	-3.41	-0.94	2.40E-04	80.10	153.33	2022-09-09	66.16
ENSRNOT00000032904	Tmem80	ENSRNOT00000032904.1	ENSRNOT00000032904.0	-0.19	0.04	0.23	2.66	-4.41	-1.75	4.97E-11	347.17	1163.13	2022-06-06	164.65
ENSRNOT00000019652	Cpt1a	ENSRNOT00000019652.1	ENSRNOT00000019652.0	-0.18	0.18	0.37	1.31	-2.10	-0.78	2.28E-10	3390.20	5847.68	49.49	220.40
ENSRNOT00000015406	Uhrf2	ENSRNOT00000015406.1	ENSRNOT00000015406.0	-0.17	0.14	0.32	2.29	-3.40	-1.10	3.85E-34	3301.92	7092.22	223.03	1147.37
ENSRNOT00000027417	Ina	ENSRNOT00000027417.1	ENSRNOT00000027417.0	-0.44	0.44	0.88	3.28	-0.35	2.93	3.83E-53	11600.20	1487.37	89.90	116.87
ENSRNOT00000059153	Pdcd4	ENSRNOT00000059153.1	ENSRNOT00000059153.0	-0.27	0.06	0.33	2.79	-3.79	-1.00	5.26E-07	1228.59	2456.67	2022-02-02	51.82
ENSRNOT00000031083	RGD1310049	ENSRNOT00000031083.1	ENSRNOT00000031083.0	-0.25	0.49	0.74	1.55	-0.05	1.51	1.54E-08	14418.48	5066.57	160.61	117.88
ENSRNOT00000014552	Thbs2	ENSRNOT00000014552.1	ENSRNOT00000014552.0	-0.27	0.13	0.40	3.84	-4.45	-0.60	1.10E-15	121.92	186.67	30.30	253.03
ENSRNOT00000027773	Actn4	ENSRNOT00000027773.1	ENSRNOT00000027773.0	-0.15	0.13	0.28	1.50	-2.84	-1.34	2.94E-10	2222.83	5633.13	19.19	183.54
ENSRNOT00000019463	Uri1	ENSRNOT00000019463.1	ENSRNOT00000019463.0	-0.16	0.02	0.18	2.92	-5.13	-2.20	5.36E-15	640.51	2938.38	2022-04-04	244.34
ENSRNOT00000019370	Capn5	ENSRNOT00000019370.1	ENSRNOT00000019370.0	-0.24	0.09	0.33	1.95	-2.94	-0.99	5.39E-05	2887.88	5740.40	2022-05-05	51.52
ENSRNOT00000027407	Ctsd	ENSRNOT00000027407.1	ENSRNOT00000027407.0	-0.24	0.29	0.53	1.47	-1.28	0.19	8.42E-21	13455.15	11812.83	221.92	424.04
ENSRNOT00000054859	Cttn	ENSRNOT00000054859.1	ENSRNOT00000054859.0	-0.19	0.02	0.21	3.47	-5.37	-1.90	3.47E-25	3796.87	14180.91	5.96	331.21
ENSRNOT00000027421	Cnih2	ENSRNOT00000027421.1	ENSRNOT00000027421.0	-0.23	0.33	0.56	1.51	-1.19	0.32	3.06E-03	547.17	437.17	18.18	36.26
ENSRNOT00000003193	Marf1	ENSRNOT00000003193.1	ENSRNOT00000003193.0	-0.22	0.01	0.23	5.39	-7.16	-1.77	1.35E-47	777.88	2712-02-01	2022-02-02	510.81
ENSRNOT00000004459	LOC100910121	ENSRNOT00000004459.1	ENSRNOT00000004459.0	-0.18	0.26	0.44	1.19	-1.54	-0.35	1.59E-08	3695.76	4697.98	56.57	170.61
ENSRNOT00000076075	LOC678813	ENSRNOT00000076075.1	ENSRNOT00000076075.0	-0.22	0.01	0.22	5.34	-7.16	-1.82	4.32E-46	750.71	2712-02-01	2022-02-02	510.81
ENSRNOT00000012720	Pgp	ENSRNOT00000012720.1	ENSRNOT00000012720.0	-0.19	0.01	0.20	4.27	-6.29	-2.02	6.47E-26	1808.69	7382.83	2022-02-02	315.66
ENSRNOT00000011808	Tmem97	ENSRNOT00000011808.1	ENSRNOT00000011808.0	-0.29	0.10	0.39	3.23	-3.88	-0.65	5.23E-11	633.43	996.57	16.16	120.20
ENSRNOT00000018468	Traf4	ENSRNOT00000018468.1	ENSRNOT00000018468.0	-0.27	0.07	0.34	2.00	-2.96	-0.96	5.65E-04	814.04	1612.53	2022-02-02	31.21
ENSRNOT00000014118	Flot2	ENSRNOT00000014118.1	ENSRNOT00000014118.0	-0.17	0.17	0.34	1.32	-2.29	-0.97	5.33E-33	13166.06	25898.38	227.68	1030.61
ENSRNOT00000004941	Lrrc59	ENSRNOT00000004941.1	ENSRNOT00000004941.0	-0.29	0.03	0.32	3.84	-4.91	-1.07	1.97E-43	4734.65	9942.83	2022-05-05	310.10
ENSRNOT00000013046	Ddx42	ENSRNOT00000013046.1	ENSRNOT00000013046.0	-0.24	0.11	0.34	1.93	-2.86	-0.93	2.12E-27	4262-02-01	8129.19	36.26	339.60
ENSRNOT00000050223	H3f3b	ENSRNOT00000050223.1	ENSRNOT00000050223.0	-0.24	0.47	0.71	1.48	-0.21	1.27	2.16E-255	40015.35	16582.32	1761.31	2266.97
ENSRNOT00000075591	AABR06062523.1	ENSRNOT00000075591.1	ENSRNOT00000075591.0	-0.21	0.21	0.42	1.45	-1.89	-0.45	1.19E-12	3541.82	4825.45	49.49	196.87
ENSRNOT00000043052	Epn2	ENSRNOT00000043052.1	ENSRNOT00000043052.0	-0.26	0.41	0.66	1.54	-0.57	0.98	1.08E-10	1885.66	955.56	51.31	84.65
ENSRNOT00000005125	Blmh	ENSRNOT00000005125.1	ENSRNOT00000005125.0	-0.15	0.06	0.22	2.45	-4.30	-1.84	6.70E-19	2174.34	7808.59	2022-04-04	231.92
ENSRNOT00000006407	Crk	ENSRNOT00000006407.1	ENSRNOT00000006407.0	-0.36	0.10	0.46	2.88	-3.13	-0.25	1.11E-42	4972-12-01	5901.52	35.15	300.51
ENSRNOT00000015207	Pigs	ENSRNOT00000015207.1	ENSRNOT00000015207.0	-0.19	0.35	0.54	1.15	-0.93	0.22	1.06E-06	2221.62	1903.94	61.31	116.06
ENSRNOT00000031045	Npepps	ENSRNOT00000031045.1	ENSRNOT00000031045.0	-0.15	0.10	0.25	1.66	-3.25	-1.59	1.03E-15	2864-04-01	8733.23	42.12	410.30
ENSRNOT00000026760	Stat3	ENSRNOT00000026760.1	ENSRNOT00000026760.0	-0.21	0.09	0.29	2.48	-3.75	-1.27	5.88E-11	1038.89	2516.57	2022-04-04	105.05
ENSRNOT00000038207	Plcxd2	ENSRNOT00000038207.2	ENSRNOT00000038207.0	-0.19	0.16	0.35	1.73	-2.65	-0.92	2.52E-09	1934.95	3680.00	2022-08-08	92.93
ENSRNOT00000002187	Adamts1	ENSRNOT00000002187.1	ENSRNOT00000002187.0	-0.28	0.09	0.37	3.52	-4.26	-0.74	6.95E-26	1006.97	1685.86	94.95	508.79
ENSRNOT00000001458	Rnf216	ENSRNOT00000001458.1	ENSRNOT00000001458.0	-0.27	0.00	0.27	3.46	-4.90	-1.43	5.76E-11	157.17	431.72	0.00	88.89
ENSRNOT00000050059	Eif4h	ENSRNOT00000050059.2	ENSRNOT00000050059.0	-0.21	0.02	0.23	4.28	-6.06	-1.78	2.01E-53	2893.84	9933.33	2022-12-12	660.00
ENSRNOT00000001534	Triap1	ENSRNOT00000001534.1	ENSRNOT00000001534.0	-0.25	0.12	0.38	2.43	-3.17	-0.73	5.99E-08	2457.37	4076.97	2022-01-11	83.84
ENSRNOT00000066892	Pitpnb	ENSRNOT00000066892.1	ENSRNOT00000066892.0	-0.32	0.05	0.37	3.39	-4.14	-0.74	3.74E-34	1522.53	2549.49	2022-01-21	294.65
ENSRNOT00000006290	Kdm5b	ENSRNOT00000006290.1	ENSRNOT00000006290.0	-0.33	0.09	0.42	2.84	-3.29	-0.45	7.56E-11	2141.21	2926.46	2.93	59.60
ENSRNOT00000071482	Tor1aip2	ENSRNOT00000071482.1	ENSRNOT00000071482.0	-0.24	0.40	0.64	1.46	-0.63	0.83	1.70E-17	8253.84	4647.88	183.74	245.35
ENSRNOT00000045326	Capn2	ENSRNOT00000045326.1	ENSRNOT00000045326.0	-0.29	0.31	0.60	2.18	-1.58	0.60	2.38E-13	7287.68	4808.69	14.14	62.53
ENSRNOT00000011158	Nipsnap1	ENSRNOT00000011158.1	ENSRNOT00000011158.0	-0.22	0.07	0.30	2.20	-3.44	-1.24	1.48E-14	3511-11-01	8251.92	17.17	200.91
ENSRNOT00000000080	LOC100910207	ENSRNOT00000000080.1	ENSRNOT00000000080.0	-0.27	0.22	0.50	2.28	-2.30	-0.02	5.24E-22	8304.55	8395.76	2022-05-15	126.06
ENSRNOT00000002862	LOC100910272	ENSRNOT00000002862.1	ENSRNOT00000002862.0	-0.35	0.20	0.55	2.27	-1.96	0.32	8.73E-32	22759.39	18264.85	62.53	232.02
ENSRNOT00000025853	Bap1	ENSRNOT00000025853.2	ENSRNOT00000025853.0	-0.25	0.01	0.26	3.54	-5.04	-1.50	7.13E-13	1825.86	5182.42	2022-02-02	119.90
ENSRNOT00000066121	Smim7	ENSRNOT00000066121.1	ENSRNOT00000066121.0	-0.33	0.16	0.49	2.36	-2.44	-0.08	5.44E-26	3051.92	3286-06-01	64.65	271.31
ENSRNOT00000016882	Cnot7	ENSRNOT00000016882.1	ENSRNOT00000016882.0	-0.21	0.34	0.55	1.40	-1.10	0.30	4.91E-26	4776.67	3877.88	198.89	407.98
ENSRNOT00000059750	Spock3	ENSRNOT00000059750.1	ENSRNOT00000059750.0	-0.16	0.12	0.27	1.48	-2.90	-1.42	4.20E-19	2870-10-01	7713.33	64.65	511.52
ENSRNOT00000017270	Lyst	ENSRNOT00000017270.2	ENSRNOT00000017270.0	-0.18	0.03	0.21	2.28	-4.19	-1.91	2.93E-08	1146.06	4292-12-01	2022-03-03	114.14
ENSRNOT00000073564	Reep2	ENSRNOT00000073564.1	ENSRNOT00000073564.0	-0.16	0.00	0.16	3.88	-6.24	-2.36	6.78E-16	557.58	2858.48	0.00	212.93
ENSRNOT00000021170	Cdh2	ENSRNOT00000021170.2	ENSRNOT00000021170.0	-0.41	0.05	0.46	3.80	-4.06	-0.26	2.56E-32	1947.58	2345.45	2022-08-08	167.88
ENSRNOT00000024328	Fech	ENSRNOT00000024328.1	ENSRNOT00000024328.0	-0.87	0.00	0.87	6.79	-3.99	2.80	2.17E-27	2245.25	320.00	0.00	2022-01-31
ENSRNOT00000074446	Sub1	ENSRNOT00000074446.1	ENSRNOT00000074446.0	-0.41	0.42	0.83	2.78	-0.48	2.30	0.00E+00	68130.71	13814.95	1923.23	2704.44
ENSRNOT00000019057	Lhfp	ENSRNOT00000019057.1	ENSRNOT00000019057.0	-0.51	0.03	0.55	2022-02-05	-4.74	0.28	1.30E-44	468.89	378.48	2022-03-03	162.12
ENSRNOT00000028316	mrpl9	ENSRNOT00000028316.1	ENSRNOT00000028316.0	-0.25	0.26	0.52	1.55	-1.46	0.10	1.02E-10	5394.55	5058.89	46.46	128.38
ENSRNOT00000041529	Csde1	ENSRNOT00000041529.1	ENSRNOT00000041529.0	-0.17	0.06	0.23	2.46	-4.22	-1.76	2.94E-54	8993.23	30434.85	70.71	1122.83
ENSRNOT00000014602	Scamp1	ENSRNOT00000014602.1	ENSRNOT00000014602.0	-0.34	0.04	0.38	3.71	-4.40	-0.69	1.30E-103	12128.69	19485.45	34.24	719.60
ENSRNOT00000016872	Hs2st1	ENSRNOT00000016872.1	ENSRNOT00000016872.0	-0.38	0.36	0.74	2.68	-1.15	1.52	3.80E-15	2802-02-01	985.05	179.39	161.01
ENSRNOT00000045315	Col18a1	ENSRNOT00000045315.1	ENSRNOT00000045315.0	-0.29	0.09	0.38	2022-07-02	-2.78	-0.71	2.89E-04	194.85	326.46	2022-04-04	38.38
ENSRNOT00000057078	Atg5	ENSRNOT00000057078.1	ENSRNOT00000057078.0	-0.25	0.10	0.35	2.58	-3.47	-0.89	2.05E-34	2006.87	3702-12-01	204.04	971.41
ENSRNOT00000066877	Dab2ip	ENSRNOT00000066877.1	ENSRNOT00000066877.0	-0.23	0.12	0.34	1.54	-2.48	-0.94	2.56E-05	891.82	1706.06	2022-12-12	77.78
ENSRNOT00000022437	Eif3j	ENSRNOT00000022437.1	ENSRNOT00000022437.0	-0.31	0.12	0.42	3.77	-4.21	-0.44	2.01E-21	1931-11-01	2621.92	20.20	174.55
ENSRNOT00000012675	Rnf114	ENSRNOT00000012675.1	ENSRNOT00000012675.0	-0.34	0.07	0.40	2.80	-3.37	-0.57	1.60E-10	2450.40	3628.59	2022-05-05	70.51
ENSRNOT00000049102	Tes	ENSRNOT00000049102.1	ENSRNOT00000049102.0	-0.17	0.09	0.25	2.16	-3.72	-1.56	6.34E-10	1443.23	4231-01-01	2022-07-07	135.15
ENSRNOT00000072271	Znrf2	ENSRNOT00000072271.1	ENSRNOT00000072271.0	-0.19	0.56	0.75	1.14	0.47	1.61	2.83E-12	3212.42	1050.10	201.72	151.82
ENSRNOT00000040576	Ptpro	ENSRNOT00000040576.1	ENSRNOT00000040576.0	-0.26	0.18	0.43	1.82	-2.20	-0.38	7.34E-09	7251.92	9462.83	2022-06-16	86.57
ENSRNOT00000018454	Sec61a1	ENSRNOT00000018454.1	ENSRNOT00000018454.0	-0.26	0.06	0.31	2.36	-3.49	-1.13	2.16E-05	937.17	2052-02-01	5.96	64.44
ENSRNOT00000019795	Sigmar1	ENSRNOT00000019795.1	ENSRNOT00000019795.0	-0.15	0.10	0.26	1.48	-3.00	-1.52	4.26E-11	2077.98	6036-06-01	31.11	279.60
ENSRNOT00000012854	Hdac1	ENSRNOT00000012854.1	ENSRNOT00000012854.0	-0.38	0.07	0.45	2.94	-3.25	-0.31	1.82E-11	2514.14	3114.24	2022-05-05	65.66
ENSRNOT00000072299	Nbl1	ENSRNOT00000072299.1	ENSRNOT00000072299.0	-0.25	0.04	0.29	3.63	-4.94	-1.31	4.54E-58	2837.78	7056.87	34.24	693.54
ENSRNOT00000042307	Eml4	ENSRNOT00000042307.1	ENSRNOT00000042307.0	-0.32	0.13	0.45	2.32	-2.62	-0.29	1.62E-17	4608-08-01	5617-07-01	21.21	141.21
ENSRNOT00000020337	Socs5	ENSRNOT00000020337.1	ENSRNOT00000020337.0	-0.31	0.26	0.58	1.92	-1.48	0.44	5.64E-154	14617.68	10828.28	468.59	1355.56
ENSRNOT00000065396	Etv1	ENSRNOT00000065396.1	ENSRNOT00000065396.0	-0.65	0.07	0.72	2022-04-05	-3.64	1.40	2.82E-151	10298.59	3874-04-01	25.25	340.00
ENSRNOT00000076169	Brms1l	ENSRNOT00000076169.1	ENSRNOT00000076169.0	-0.17	0.05	0.22	1.95	-3.78	-1.83	7.65E-10	1779.80	6316.87	2022-04-04	136.36
ENSRNOT00000005439	Pnn	ENSRNOT00000005439.1	ENSRNOT00000005439.0	-0.39	0.23	0.63	3.41	-2.67	0.74	5.52E-20	2184.75	1306.06	2022-11-21	90.91
ENSRNOT00000012273	LOC100910964	ENSRNOT00000012273.1	ENSRNOT00000012273.0	-0.15	0.07	0.22	2.63	-4.41	-1.79	6.72E-17	5022.32	17339.60	25.15	365.56
ENSRNOT00000060943	Tmem179	ENSRNOT00000060943.1	ENSRNOT00000060943.0	-0.20	0.14	0.34	1.87	-2.80	-0.93	2.69E-11	3718.28	7099-09-01	21.21	158.38
ENSRNOT00000037844	Dusp6	ENSRNOT00000037844.1	ENSRNOT00000037844.0	-0.20	0.31	0.52	1.16	-1.06	0.10	8.70E-03	7882.42	7291-01-01	2022-05-15	33.13
ENSRNOT00000008969	Laptm4b	ENSRNOT00000008969.1	ENSRNOT00000008969.0	-0.17	0.10	0.27	1.78	-3.21	-1.43	4.99E-14	4061-11-01	10980.81	47.27	369.49
ENSRNOT00000029045	Tmtc3	ENSRNOT00000029045.2	ENSRNOT00000029045.0	-0.16	0.03	0.19	1.69	-3.75	-2.06	8.83E-03	340.30	1419.29	0.91	37.37
ENSRNOT00000015741	Senp6	ENSRNOT00000015741.1	ENSRNOT00000015741.0	-0.35	0.47	0.82	2.37	-0.18	2.19	2.28E-38	3153.74	686.87	120.20	148.48
ENSRNOT00000026106	Trak1	ENSRNOT00000026106.1	ENSRNOT00000026106.0	-0.19	0.09	0.28	2.37	-3.75	-1.38	2.32E-39	3837.17	9992-12-01	67.58	735.35
ENSRNOT00000007223	Sacm1l	ENSRNOT00000007223.1	ENSRNOT00000007223.0	-0.18	0.32	0.50	1.15	-1.16	-0.01	2.49E-23	6542.73	6648.28	214.14	491.62
ENSRNOT00000064818	Nedd4	ENSRNOT00000064818.1	ENSRNOT00000064818.0	-0.21	0.02	0.24	3.81	-5.53	-1.72	9.05E-102	9181.82	30437.27	24.14	1223.03
ENSRNOT00000019180	Map4k4	ENSRNOT00000019180.1	ENSRNOT00000019180.0	-0.39	0.33	0.71	2.60	-1.28	1.32	3.93E-13	3405.86	1393.74	50.40	78.59
ENSRNOT00000045749	RGD1562136	ENSRNOT00000045749.1	ENSRNOT00000045749.0	-0.17	0.21	0.38	1.14	-1.85	-0.71	1.30E-06	3724.34	6099-09-01	40.20	152.42
ENSRNOT00000004692	Ogt	ENSRNOT00000004692.1	ENSRNOT00000004692.0	-0.25	0.06	0.32	2.66	-3.78	-1.12	1.37E-18	4249.70	9198.79	9.49	176.67
ENSRNOT00000068113	Trappc2	ENSRNOT00000068113.1	ENSRNOT00000068113.0	-0.19	0.13	0.31	1.64	-2.78	-1.14	2.37E-31	3846.46	8554.95	155.45	901.11
ENSRNOT00000020364	LOC100909548	ENSRNOT00000020364.1	ENSRNOT00000020364.0	-0.16	0.07	0.23	2022-09-02	-3.83	-1.74	8.20E-05	1665.86	5566-06-01	2022-02-02	57.58
ENSRNOT00000003247	Morf4l2	ENSRNOT00000003247.1	ENSRNOT00000003247.0	-0.18	0.14	0.32	1.55	-2.63	-1.09	3.22E-150	61400.10	130324.44	757.27	4143.84
ENSRNOT00000006484	Zdhhc9	ENSRNOT00000006484.1	ENSRNOT00000006484.0	-0.28	0.15	0.43	2.23	-2.64	-0.41	3.22E-16	1748.18	2321.92	43.43	205.05
ENSRNOT00000019987	Acer3	ENSRNOT00000019987.2	ENSRNOT00000019987.3	-0.22	0.40	0.63	1.30	-0.56	0.74	3.04E-21	2236.67	1343.94	213.74	317.78
ENSRNOT00000025355	Rgs17	ENSRNOT00000025355.1	ENSRNOT00000025355.8	-0.16	0.02	0.18	3.47	-5.71	-2.24	2.11E-59	2912.83	13586.97	17.17	1023.43
ENSRNOT00000026754	Hdgfrp3	ENSRNOT00000026754.1	ENSRNOT00000026754.2	-0.28	0.08	0.36	2022-07-02	-2.91	-0.85	1.55E-04	1425.45	2584.34	2022-03-03	37.37
ENSRNOT00000027118	Wbp1l	ENSRNOT00000027118.1	ENSRNOT00000027118.6	-0.25	0.14	0.39	2.85	-3.51	-0.66	4.31E-09	713.23	1129.60	2022-05-05	67.58
ENSRNOT00000036880	Zscan18	ENSRNOT00000036880.2	ENSRNOT00000036880.3	-0.18	0.15	0.33	1.70	-2.73	-1.02	1.38E-18	2943.74	5986.67	2022-12-12	184.85
ENSRNOT00000043854	Slco3a1	ENSRNOT00000043854.2	ENSRNOT00000043854.5	-0.31	0.00	0.31	4.45	-5.64	-1.19	6.53E-16	437.07	999.60	0.00	106.06
ENSRNOT00000076340	Slco3a1	ENSRNOT00000076340.1	ENSRNOT00000076340.3	-0.24	0.32	0.56	1.42	-1.09	0.33	9.52E-06	1253.03	999.60	62.63	106.06
ENSRNOT00000005067	Nptx1	ENSRNOT00000005067.2	ENSRNOT00000005067.4	-0.16	0.34	0.50	1.63	-1.64	-0.01	1.30E-12	4856.87	4942-12-01	46.46	148.38
ENSRNOT00000002478	Dnm1l	ENSRNOT00000002478.1	ENSRNOT00000002478.5	-0.26	0.03	0.29	3.22	-4.54	-1.32	1.59E-15	2804.95	6979.80	2022-04-04	142.42
ENSRNOT00000047320	Hspa13	ENSRNOT00000047320.0	ENSRNOT00000047320.4	-0.15	0.01	0.16	3.85	-6.21	-2.36	9.52E-51	3146.46	16200.00	2022-10-10	881.41
ENSRNOT00000011065	Vamp7	ENSRNOT00000011065.1	ENSRNOT00000011065.5	-0.22	0.04	0.26	2.59	-4.10	-1.51	5.83E-09	2741.31	7826-06-01	2022-04-04	102.83
ENSRNOT00000046412	Ift22	ENSRNOT00000046412.0	ENSRNOT00000046412.5	-0.24	0.09	0.33	2.28	-3.30	-1.02	2.15E-09	68.18	137.78	2022-08-08	126.16
ENSRNOT00000004520	Actr3	ENSRNOT00000004520.1	ENSRNOT00000004520.5	-0.21	0.19	0.40	1.57	-2.14	-0.57	3.88E-70	17398.79	25752.93	277.68	1224.44
ENSRNOT00000009214	Purb	ENSRNOT00000009214.2	ENSRNOT00000009214.4	-0.52	0.00	0.52	5.67	-5.58	0.09	4.69E-29	401.31	375.25	0.00	100.91
ENSRNOT00000011158	Nipsnap1	ENSRNOT00000011158.1	ENSRNOT00000011158.3	-0.25	0.09	0.34	2.22	-3.16	-0.95	2.24E-13	3511-11-01	6739.49	17.17	159.60
ENSRNOT00000014044	Xbp1	ENSRNOT00000014044.1	ENSRNOT00000014044.4	-0.22	0.38	0.60	1.29	-0.71	0.57	3.62E-06	5984.65	4019.60	83.74	113.03
ENSRNOT00000049214	Apbb2	ENSRNOT00000049214.1	ENSRNOT00000049214.2	-0.23	0.00	0.23	5.97	-7.72	-1.75	1.02E-61	881.82	2964.95	2022-01-01	621.82
ENSRNOT00000068682	Ankrd17	ENSRNOT00000068682.1	ENSRNOT00000068682.2	-0.23	0.56	0.80	1.38	0.58	1.96	6.88E-81	11366.77	2918.69	679.39	576.46
ENSRNOT00000018972	Ap5m1	ENSRNOT00000018972.0	ENSRNOT00000018972.5	-0.23	0.01	0.24	3.90	-5.55	-1.65	1.55E-22	332.53	1044.14	2022-02-02	236.36
ENSRNOT00000020074	Naa30	ENSRNOT00000020074.1	ENSRNOT00000020074.4	-0.16	0.00	0.16	3.32	-5.76	-2.43	1.12E-11	579.29	3149.49	0.00	163.43
ENSRNOT00000032704	Ddhd1	ENSRNOT00000032704.1	ENSRNOT00000032704.4	-0.35	0.02	0.37	3.43	-4.22	-0.79	4.60E-31	2620.51	4546-06-01	2022-07-07	211.11
ENSRNOT00000057572	Abi1	ENSRNOT00000057572.1	ENSRNOT00000057572.4	-0.29	0.08	0.37	3.21	-4.00	-0.79	5.33E-71	4620.61	7985-05-01	76.46	766.87
ENSRNOT00000020431	Tcf4	ENSRNOT00000020431.0	ENSRNOT00000020431.7	-0.57	0.02	0.59	5.70	-5.19	0.51	8.90E-54	628.48	446.57	2.93	175.35
ENSRNOT00000021170	Cdh2	ENSRNOT00000021170.2	ENSRNOT00000021170.3	-0.38	0.05	0.42	3.63	-4.09	-0.46	6.02E-29	1947.58	2699.49	2022-08-08	171.31
ENSRNOT00000021624	Rprd1a	ENSRNOT00000021624.2	ENSRNOT00000021624.4	-0.17	0.02	0.19	2.75	-4.83	-2.08	2.94E-11	596.57	2530.20	2022-04-04	179.49
ENSRNOT00000018535	Cdh11	ENSRNOT00000018535.1	ENSRNOT00000018535.2	-0.31	0.10	0.41	3.38	-3.92	-0.53	6.01E-11	116.46	169.49	2022-05-05	84.44
ENSRNOT00000014871	Gnb4	ENSRNOT00000014871.1	ENSRNOT00000014871.5	-0.22	0.01	0.23	2022-06-03	-4.79	-1.73	3.82E-10	662.12	2175.15	2022-02-02	112.12
ENSRNOT00000016135	Papd4	ENSRNOT00000016135.1	ENSRNOT00000016135.4	-0.28	0.00	0.28	2.96	-4.29	-1.34	1.29E-05	162.93	416.46	0.00	39.39
ENSRNOT00000019824	Dhx36	ENSRNOT00000019824.1	ENSRNOT00000019824.5	-0.26	0.16	0.42	3.21	-3.70	-0.50	6.05E-16	3102.42	4383.64	2022-05-05	94.85
ENSRNOT00000046069	Nup155	ENSRNOT00000046069.0	ENSRNOT00000046069.6	-0.74	0.08	0.82	5.58	-3.39	2.20	2.13E-73	2588.89	564.65	2022-10-10	123.23
ENSRNOT00000047975	Ppp3ca	ENSRNOT00000047975.0	ENSRNOT00000047975.4	-0.23	0.41	0.63	1.59	-0.81	0.78	3.93E-10	5107.78	2973.23	20.71	57.07
ENSRNOT00000052072	Gfm2	ENSRNOT00000052072.0	ENSRNOT00000052072.2	-0.21	0.10	0.31	1.62	-2.75	-1.13	5.56E-07	95.56	212.32	19.19	157.37
ENSRNOT00000052072	Gfm2	ENSRNOT00000052072.0	ENSRNOT00000052072.4	-0.31	0.18	0.49	3.15	-3.21	-0.06	2.31E-12	95.56	100.40	19.19	128.79
ENSRNOT00000057422	Man1a1	ENSRNOT00000057422.1	ENSRNOT00000057422.5	-0.20	0.16	0.36	2.46	-3.32	-0.86	1.44E-13	2946.77	5344.34	5.96	107.98
ENSRNOT00000061950	Hspa1a	ENSRNOT00000061950.2	ENSRNOT00000061950.7	-0.70	0.01	0.71	7.28	-5.97	1.31	1.74E-282	3113.23	1225.96	2022-09-09	623.54
ENSRNOT00000007028	Spred1	ENSRNOT00000007028.2	ENSRNOT00000007028.5	-0.61	0.01	0.62	2022-07-07	-6.38	0.69	3.37E-90	993.33	609.19	0.91	249.09
ENSRNOT00000012428	Caprin1	ENSRNOT00000012428.0	ENSRNOT00000012428.2	-0.18	0.59	0.77	2022-12-01	0.60	1.72	2.12E-27	18271.11	5539.90	285.86	239.09
ENSRNOT00000031622	Pmpca	ENSRNOT00000031622.2	ENSRNOT00000031622.3	-0.28	0.16	0.44	2022-06-02	-2.41	-0.35	1.37E-39	1512.42	1932.32	91.62	483.74
ENSRNOT00000056022	Fbn1	ENSRNOT00000056022.1	ENSRNOT00000056022.3	-0.24	0.03	0.26	3.54	-5.03	-1.49	6.39E-15	87.68	248.79	2022-12-12	286.67
ENSRNOT00000056405	Chp1	ENSRNOT00000056405.0	ENSRNOT00000056405.4	-0.23	0.77	1.00	6.47	1.88	8.35	0.00E+00	40382.83	123.43	1971.21	569.19
ENSRNOT00000009752	LOC500034	ENSRNOT00000009752.0	ENSRNOT00000009752.3	-0.29	0.06	0.35	2.75	-3.67	-0.92	3.60E-09	1193.94	2263.74	2022-05-05	78.79
ENSRNOT00000011292	Syn2	ENSRNOT00000011292.0	ENSRNOT00000011292.5	-0.19	0.65	0.85	1.57	0.92	2.49	1.03E-87	39860.20	7095.15	1161.82	618.79
ENSRNOT00000045311	Nub1	ENSRNOT00000045311.0	ENSRNOT00000045311.2	-0.32	0.25	0.57	2022-02-02	-1.58	0.43	7.86E-55	14103.13	10435.35	247.47	579.70
ENSRNOT00000072698	Mest	ENSRNOT00000072698.0	ENSRNOT00000072698.5	-0.19	0.07	0.25	2.37	-3.93	-1.56	7.38E-06	1097.78	3241.62	2022-02-02	61.92
ENSRNOT00000007851	A3galt2	ENSRNOT00000007851.1	ENSRNOT00000007851.3	-0.21	0.33	0.54	1.91	-1.66	0.26	1.29E-52	9365.56	7862.93	48.48	294.95
ENSRNOT00000009136	Vcpip1	ENSRNOT00000009136.1	ENSRNOT00000009136.5	-0.27	0.14	0.41	2.61	-3.13	-0.51	6.82E-34	3217.37	4586-06-01	2022-12-12	216.36
ENSRNOT00000020534	Cript	ENSRNOT00000020534.1	ENSRNOT00000020534.3	-0.27	0.41	0.67	1.60	-0.57	2022-03-01	3.95E-170	7882.42	3848.18	1102.42	1760.71
ENSRNOT00000020534	Cript	ENSRNOT00000020534.1	ENSRNOT00000020534.5	-0.23	0.53	0.76	1.52	0.18	1.70	1.84E-122	7882.42	2429.60	1102.42	1087.17
ENSRNOT00000049770	Ahr	ENSRNOT00000049770.3	ENSRNOT00000049770.4	-0.24	0.40	0.64	1.43	-0.62	0.81	3.07E-09	4631.52	2606.36	136.26	158.59
ENSRNOT00000006411	Baalc	ENSRNOT00000006411.0	ENSRNOT00000006411.4	-0.18	0.05	0.23	2.41	-4.15	-1.74	4.81E-17	376.57	1288.38	3.94	216.16
ENSRNOT00000016240	Znf740	ENSRNOT00000016240.2	ENSRNOT00000016240.3	-0.34	0.00	0.34	4.22	-5.18	-0.96	2.24E-30	126.26	245.66	2022-01-01	246.26
ENSRNOT00000015177	Srpr	ENSRNOT00000015177.0	ENSRNOT00000015177.3	-0.16	0.01	0.17	2.63	-4.88	-2.25	1.44E-05	334.44	1602.53	2022-01-01	82.53
ENSRNOT00000058685	Sin3a	ENSRNOT00000058685.0	ENSRNOT00000058685.4	-0.16	0.31	0.48	1.83	-1.97	-0.14	9.12E-04	271.01	298.08	22.22	58.59
ENSRNOT00000035238	Bmpr2	ENSRNOT00000035238.0	ENSRNOT00000035238.7	-0.34	0.02	0.36	3.42	-4.22	-0.81	4.05E-18	276.06	484.34	2022-05-05	138.38
ENSRNOT00000003283	Plp1	ENSRNOT00000003283.1	ENSRNOT00000003283.3	-0.38	0.25	0.63	2.92	-2.14	0.78	1.23E-17	249.09	143.33	103.74	230.10
ENSRNOT00000058134	Eif2s3y	ENSRNOT00000058134.1	ENSRNOT00000058134.4	-0.24	0.12	0.36	2022-10-02	-2.90	-0.81	6.65E-36	3906.87	6829.49	37.37	378.48
ENSRNOT00000028664	Mllt11	ENSRNOT00000028664.1	ENSRNOT00000028664.4	-0.20	0.09	0.29	1.98	-3.27	-1.28	2.02E-23	3219.49	7814.55	55.45	470.71
ENSRNOT00000012273	LOC100910964	ENSRNOT00000012273.1	ENSRNOT00000012273.2	-0.26	0.13	0.39	2.51	-3.17	-0.65	9.28E-12	5022.32	7889.29	25.15	149.19
ENSRNOT00000030244	RGD1311648	ENSRNOT00000030244.1	ENSRNOT00000030244.3	-0.47	0.00	0.47	2022-02-04	-4.17	-0.16	5.86E-10	431.72	482.42	0.00	35.96
ENSRNOT00000015979	Sorcs1	ENSRNOT00000015979.1	ENSRNOT00000015979.5	-0.47	0.11	0.58	2022-07-03	-2.62	0.45	6.26E-09	744.85	544.44	2022-05-05	37.37
ENSRNOT00000016164	Pcsk5	ENSRNOT00000016164.0	ENSRNOT00000016164.7	-0.29	0.24	0.53	2.26	-2.10	0.16	1.23E-15	2574-04-01	2303.84	2022-09-09	76.67
ENSRNOT00000050617	Cacul1	ENSRNOT00000050617.1	ENSRNOT00000050617.4	-0.26	0.04	0.30	4.17	-5.37	-1.20	8.34E-75	3005.15	6922.42	2022-05-05	557.88
ENSRNOT00000067142	Pde10a	ENSRNOT00000067142.0	ENSRNOT00000067142.7	-0.21	0.00	0.21	3.38	-5.40	-2.02	2.27E-12	361.01	1600.61	0.00	147.47
ENSRNOT00000068457	Tmem181	ENSRNOT00000068457.0	ENSRNOT00000068457.7	-0.52	0.15	0.67	3.39	-2.39	1.00	7.93E-26	4794.85	2401-01-01	13.13	82.83
ENSRNOT00000006926	Dhx40	ENSRNOT00000006926.0	ENSRNOT00000006926.2	-0.30	0.34	0.65	1.66	-0.79	0.87	5.94E-12	1881.11	1026.67	81.82	125.25
ENSRNOT00000031208	Rundc1	ENSRNOT00000031208.2	ENSRNOT00000031208.4	-0.16	0.20	0.36	1.73	-2.55	-0.82	4.01E-06	503.64	891.31	38.18	157.58
ENSRNOT00000052202	Pitpnb	ENSRNOT00000052202.2	ENSRNOT00000052202.3	-0.28	0.04	0.32	3.32	-4.39	-1.07	1.07E-36	1522.53	3195.86	2022-01-21	376.46
ENSRNOT00000004228	Sdhc	ENSRNOT00000004228.1	ENSRNOT00000004228.2	-0.19	0.19	0.39	1.33	-2.00	-0.67	3.15E-10	9879-09-01	15716.26	72.73	261.41
ENSRNOT00000032157	Rnasel	ENSRNOT00000032157.0	ENSRNOT00000032157.3	-0.27	0.00	0.27	3.16	-4.60	-1.44	4.93E-07	248.18	649.39	0.00	50.51
ENSRNOT00000075674	Nucks1	ENSRNOT00000075674.1	ENSRNOT00000075674.5	-0.16	0.34	0.50	2.14	-2.13	0.01	3.67E-16	2135.76	2111.41	114.95	284.34
ENSRNOT00000066382	LOC100910272	ENSRNOT00000066382.0	ENSRNOT00000066382.4	-0.36	0.20	0.56	2.37	-2.01	0.36	9.30E-34	22953.64	17819.80	60.51	231.01
ENSRNOT00000010476	Ppp3cb	ENSRNOT00000010476.0	ENSRNOT00000010476.6	-0.76	0.06	0.82	6.25	-4.03	2.22	4.86E-144	2348.59	502.63	8.89	234.24
ENSRNOT00000027071	Parg	ENSRNOT00000027071.1	ENSRNOT00000027071.2	-0.40	0.15	0.55	2.84	-2.56	0.28	2.21E-16	1478.48	1227.98	26.26	112.12
ENSRNOT00000066062	Ncoa4	ENSRNOT00000066062.1	ENSRNOT00000066062.4	-0.21	0.05	0.26	2.94	-4.47	-1.54	1.79E-20	1364.65	3964.85	16.87	307.58
ENSRNOT00000023861	Kif5b	ENSRNOT00000023861.1	ENSRNOT00000023861.6	-0.15	0.13	0.29	1.41	-2.73	-1.32	7.37E-23	238.99	601.82	351.72	2358.18
ENSRNOT00000057572	Abi1	ENSRNOT00000057572.1	ENSRNOT00000057572.3	-0.38	0.22	0.60	2.85	-2.25	0.60	1.88E-32	4620.61	3046.36	76.46	224.44
ENSRNOT00000018025	Mib1	ENSRNOT00000018025.0	ENSRNOT00000018025.6	-0.15	0.00	0.15	2022-04-04	-6.51	-2.47	4.91E-13	220.81	1233.64	0.00	197.58
ENSRNOT00000019911	Bcl10	ENSRNOT00000019911.1	ENSRNOT00000019911.2	-0.18	0.18	0.37	1.29	-2.08	-0.79	6.86E-06	3264.24	5638.79	33.33	135.35
ENSRNOT00000047975	Ppp3ca	ENSRNOT00000047975.0	ENSRNOT00000047975.5	-0.52	0.13	0.65	4.23	-3.35	0.88	1.02E-110	5107.78	2780.51	20.71	320.51
ENSRNOT00000068606	Rnf13	ENSRNOT00000068606.1	ENSRNOT00000068606.3	-0.19	0.18	0.36	1.29	-2.10	-0.81	2.40E-12	3648.38	6396.67	68.69	298.18
ENSRNOT00000000698	Spock2	ENSRNOT00000000698.0	ENSRNOT00000000698.7	-0.20	0.17	0.37	1.28	-2.07	-0.78	2.96E-03	2586.57	4373.54	2022-08-08	42.42
ENSRNOT00000037419	LOC100910755	ENSRNOT00000037419.0	ENSRNOT00000037419.4	-0.43	0.03	0.45	4.19	-4.46	-0.28	5.46E-14	156.36	200.30	2022-02-02	74.75
ENSRNOT00000067883	Vps26a	ENSRNOT00000067883.0	ENSRNOT00000067883.4	-0.18	0.01	0.19	3.25	-5.38	-2.13	5.31E-09	1666.77	7276.36	2022-01-01	116.16
ENSRNOT00000022451	Rgs19	ENSRNOT00000022451.0	ENSRNOT00000022451.3	-0.25	0.34	0.59	1.48	-0.97	0.51	4.49E-20	2455.56	1718.48	83.74	194.65
ENSRNOT00000067874	AABR06030862.1	ENSRNOT00000067874.2	ENSRNOT00000067874.6	-0.67	0.01	0.68	5.62	-4.52	2022-10-01	1.99E-39	1710.91	797.07	2022-02-02	89.49
ENSRNOT00000071116	Mcart1	ENSRNOT00000071116.1	ENSRNOT00000071116.5	-0.36	0.24	0.59	2.75	-2.21	0.54	1.69E-04	1027.68	706.67	24.24	45.45
ENSRNOT00000007564	Phf20l1	ENSRNOT00000007564.2	ENSRNOT00000007564.6	-0.17	0.03	0.20	2.71	-4.68	-1.97	2.58E-12	62.42	250.61	2022-05-05	260.20
ENSRNOT00000042070	RGD1304694	ENSRNOT00000042070.0	ENSRNOT00000042070.4	-0.21	0.24	0.45	1.65	-1.91	-0.27	2.30E-15	2954.85	3478.59	25.25	137.37
ENSRNOT00000018598	Arcn1	ENSRNOT00000018598.1	ENSRNOT00000018598.4	-0.32	0.10	0.42	2.50	-2.99	-0.49	3.87E-19	2919.49	4098.99	2022-08-18	158.59
ENSRNOT00000059159	LOC685203	ENSRNOT00000059159.2	ENSRNOT00000059159.8	-0.51	0.25	0.76	3.29	-1.61	1.68	1.37E-46	4395.15	1376.46	38.28	132.32
ENSRNOT00000060419	Bend6	ENSRNOT00000060419.2	ENSRNOT00000060419.5	-0.21	0.29	0.50	1.31	-1.33	-0.02	2.44E-12	3608.59	3659-09-01	101.92	237.98
ENSRNOT00000005630	Chst7	ENSRNOT00000005630.2	ENSRNOT00000005630.5	-0.35	0.14	0.48	3.39	-3.49	-0.10	4.17E-25	2008.69	2128.18	2022-05-05	113.23
ENSRNOT00000047669	Cttn	ENSRNOT00000047669.1	ENSRNOT00000047669.3	-0.20	0.11	0.31	2.45	-3.60	-1.15	2.10E-12	6407.47	14176.87	58.28	329.19
ENSRNOT00000004010	Mapk9	ENSRNOT00000004010.1	ENSRNOT00000004010.5	-0.17	0.09	0.26	1.56	-3.06	-1.50	9.45E-07	586.16	1665.66	13.13	136.36
ENSRNOT00000003136	Phox2b	ENSRNOT00000003136.2	ENSRNOT00000003136.3	-0.18	0.09	0.28	1.91	-3.30	-1.40	3.98E-13	4221-11-01	11106.77	2022-11-11	175.45
ENSRNOT00000055792	Mapk8ip2	ENSRNOT00000055792.0	ENSRNOT00000055792.3	-0.19	0.42	0.61	1.15	-0.48	0.67	3.71E-89	6875.76	4308.48	1124.65	1669.29
ENSRNOT00000014805	Tbpl1	ENSRNOT00000014805.1	ENSRNOT00000014805.4	-0.24	0.32	0.56	1.49	-1.13	0.36	1.50E-07	3934.65	3069.49	48.48	95.76
ENSRNOT00000022056	Il33	ENSRNOT00000022056.1	ENSRNOT00000022056.3	-0.22	0.06	0.28	3.14	-4.49	-1.35	6.88E-17	60.10	150.71	13.13	351.11
ENSRNOT00000024974	Adam12	ENSRNOT00000024974.2	ENSRNOT00000024974.4	-0.25	0.00	0.25	3.41	-4.96	-1.55	7.60E-10	49.19	144.95	0.00	96.67
ENSRNOT00000025309	Gga2	ENSRNOT00000025309.1	ENSRNOT00000025309.3	-0.22	0.36	0.58	1.34	-0.88	0.47	4.55E-18	24419.80	17424.65	274.24	391.82
ENSRNOT00000025355	Rgs17	ENSRNOT00000025355.1	ENSRNOT00000025355.6	-0.48	0.27	0.75	3.24	-1.64	1.60	8.46E-27	2912.83	946.77	17.17	71.41
ENSRNOT00000025355	Rgs17	ENSRNOT00000025355.1	ENSRNOT00000025355.7	-0.35	0.10	0.45	3.31	-3.63	-0.31	9.37E-56	2912.83	3570.51	17.17	311.72
ENSRNOT00000027574	Sh3pxd2a	ENSRNOT00000027574.2	ENSRNOT00000027574.5	-0.44	0.34	0.78	3.34	-1.54	1.80	0.00E+00	4271.62	1224.85	342.42	1193.74
ENSRNOT00000027574	Sh3pxd2a	ENSRNOT00000027574.2	ENSRNOT00000027574.6	-0.47	0.27	0.74	3.71	-2.23	1.48	0.00E+00	4271.62	1536.06	342.42	1905.86
ENSRNOT00000054859	Cttn	ENSRNOT00000054859.1	ENSRNOT00000054859.2	-0.25	0.05	0.29	2.82	-4.08	-1.26	3.12E-20	3796.87	9088.59	5.96	187.27
ENSRNOT00000056327	Mecp2	ENSRNOT00000056327.3	ENSRNOT00000056327.5	-0.36	0.05	0.41	3.54	-4.10	-0.56	7.78E-12	522.22	726.36	2022-03-03	67.68
ENSRNOT00000041493	Kif1c	ENSRNOT00000041493.0	ENSRNOT00000041493.2	-0.24	0.43	0.67	1.45	-0.43	2022-01-01	2.65E-13	235.66	116.46	552.73	687.58
ENSRNOT00000002343	Opa1	ENSRNOT00000002343.1	ENSRNOT00000002343.4	-0.26	0.14	0.40	2.78	-3.39	-0.61	2.33E-14	944.75	1436.57	2022-08-08	107.07
ENSRNOT00000003346	G3bp2	ENSRNOT00000003346.0	ENSRNOT00000003346.3	-0.20	0.08	0.27	1.82	-3.23	-1.41	3.20E-06	2908.99	7762.32	2022-05-05	77.78
ENSRNOT00000026227	Ablim3	ENSRNOT00000026227.0	ENSRNOT00000026227.2	-0.50	0.26	0.76	3.39	-1.73	1.66	4.27E-38	124.95	38.48	37.27	221.92
ENSRNOT00000026706	Isoc1	ENSRNOT00000026706.1	ENSRNOT00000026706.3	-0.29	0.13	0.42	2022-05-02	-2.50	-0.46	3.33E-10	767.17	1061.01	2022-08-08	76.67
ENSRNOT00000051397	Set	ENSRNOT00000051397.1	ENSRNOT00000051397.4	-0.25	0.33	0.58	1.47	-1.01	0.46	1.51E-04	9161.41	6674.95	38.99	63.43
ENSRNOT00000051397	Set	ENSRNOT00000051397.1	ENSRNOT00000051397.5	-0.30	0.04	0.35	3.57	-4.49	-0.92	4.59E-83	9161.41	17341.41	38.99	724.34
ENSRNOT00000010344	Mynn	ENSRNOT00000010344.1	ENSRNOT00000010344.5	-0.21	0.09	0.30	1.82	-3.08	-1.26	6.64E-07	720.20	1688.38	2022-10-20	145.25
ENSRNOT00000016567	Pkia	ENSRNOT00000016567.0	ENSRNOT00000016567.4	-0.18	0.02	0.20	3.72	-5.71	-1.99	1.85E-29	528.99	2105.96	2022-02-02	364.55
ENSRNOT00000046215	Rai14	ENSRNOT00000046215.1	ENSRNOT00000046215.2	-0.20	0.00	0.20	3.68	-5.67	-1.99	2.43E-12	205.35	813.13	0.00	137.27
ENSRNOT00000067456	Vcan	ENSRNOT00000067456.1	ENSRNOT00000067456.2	-0.16	0.02	0.18	4.45	-6.62	-2.17	2.50E-28	150.91	683.13	2022-07-07	584.24
ENSRNOT00000032600	Hnrnph3	ENSRNOT00000032600.1	ENSRNOT00000032600.3	-0.22	0.43	0.65	1.31	-0.40	0.91	5.03E-49	3253.94	1703.03	852.83	1013.13
ENSRNOT00000067883	Vps26a	ENSRNOT00000067883.0	ENSRNOT00000067883.6	-0.44	0.01	0.45	4.20	-4.46	-0.27	6.67E-16	1666.77	2011.52	2022-01-01	66.67
ENSRNOT00000028888	Cds2	ENSRNOT00000028888.2	ENSRNOT00000028888.3	-0.28	0.14	0.42	2022-02-03	-3.48	-0.46	2.11E-20	3647.68	5008.79	2022-05-05	114.04
ENSRNOT00000029701	Dzank1	ENSRNOT00000029701.2	ENSRNOT00000029701.3	-0.28	0.00	0.28	3.40	-4.79	-1.38	3.64E-08	215.05	564.44	0.00	59.60
ENSRNOT00000068018	Lnp	ENSRNOT00000068018.0	ENSRNOT00000068018.8	-0.25	0.00	0.25	5.33	-6.88	-1.55	3.38E-41	840.71	2473.33	0.91	364.95
ENSRNOT00000013621	Wnk1	ENSRNOT00000013621.1	ENSRNOT00000013621.4	-0.24	0.03	0.27	2.99	-4.45	-1.45	4.91E-12	498.38	1372.12	3.94	129.70
ENSRNOT00000009744	Clvs1	ENSRNOT00000009744.1	ENSRNOT00000009744.2	-0.20	0.04	0.25	2.67	-4.28	-1.62	1.40E-06	755.25	2320.91	2022-02-02	71.62
ENSRNOT00000075457	Ski	ENSRNOT00000075457.2	ENSRNOT00000075457.4	-0.16	0.14	0.30	1.58	-2.78	-1.20	2.12E-06	801.82	1840.20	26.46	157.58
ENSRNOT00000005637	Snx13	ENSRNOT00000005637.0	ENSRNOT00000005637.3	-0.32	0.00	0.32	4.44	-5.51	-1.08	7.61E-26	345.15	728.99	0.00	169.70
ENSRNOT00000006755	Ppp2r5e	ENSRNOT00000006755.1	ENSRNOT00000006755.2	-0.27	0.17	0.45	2.38	-2.69	-0.31	1.13E-14	2701.62	3353.64	66.46	233.23
ENSRNOT00000006755	Ppp2r5e	ENSRNOT00000006755.1	ENSRNOT00000006755.5	-0.33	0.24	0.57	2.25	-1.87	0.38	1.59E-11	2701.62	2080.00	66.46	140.40
ENSRNOT00000012415	Prkar2b	ENSRNOT00000012415.1	ENSRNOT00000012415.3	-0.36	0.07	0.43	3.20	-3.59	-0.39	3.11E-43	5505.45	7227.68	31.31	315.66
ENSRNOT00000030244	RGD1311648	ENSRNOT00000030244.1	ENSRNOT00000030244.2	-0.26	0.00	0.26	3.74	-5.23	-1.49	1.38E-09	431.72	1222.93	0.00	74.55
ENSRNOT00000065223	Gabrb3	ENSRNOT00000065223.2	ENSRNOT00000065223.5	-0.20	0.01	0.21	4.73	-6.65	-1.92	5.06E-28	1441.92	5470.40	2022-01-01	302.63
ENSRNOT00000067142	Pde10a	ENSRNOT00000067142.0	ENSRNOT00000067142.3	-0.50	0.00	0.50	5.41	-5.39	0.02	1.67E-24	361.01	363.23	0.00	88.69
ENSRNOT00000071764	Pitpnm3	ENSRNOT00000071764.3	ENSRNOT00000071764.4	-0.23	0.07	0.30	1.73	-2.92	-1.19	5.59E-03	161.31	363.13	2022-06-06	45.45
ENSRNOT00000014492	Nrp1	ENSRNOT00000014492.0	ENSRNOT00000014492.2	-0.49	0.07	0.56	2022-12-04	-3.79	0.34	8.26E-19	1251.01	988.28	2022-07-07	76.77
ENSRNOT00000018454	Sec61a1	ENSRNOT00000018454.1	ENSRNOT00000018454.2	-0.17	0.03	0.19	2.57	-4.63	-2.06	7.96E-08	937.17	3916.16	5.96	149.29
ENSRNOT00000035238	Bmpr2	ENSRNOT00000035238.0	ENSRNOT00000035238.6	-0.44	0.06	0.49	3.23	-3.28	-0.05	1.09E-09	276.06	285.15	2022-05-05	52.53
ENSRNOT00000050891	Vegfb	ENSRNOT00000050891.0	ENSRNOT00000050891.3	-0.42	0.13	0.55	3.69	-3.40	0.28	3.65E-58	795.66	664.24	2022-07-17	264.44
ENSRNOT00000065411	Osbp	ENSRNOT00000065411.1	ENSRNOT00000065411.5	-0.25	0.15	0.40	2.43	-3.01	-0.58	3.87E-04	1192.02	1783.03	23.23	80.81
ENSRNOT00000067142	Pde10a	ENSRNOT00000067142.0	ENSRNOT00000067142.5	-0.40	0.00	0.40	5.49	-6.10	-0.62	7.70E-27	361.01	574.95	0.00	140.20
ENSRNOT00000004010	Mapk9	ENSRNOT00000004010.1	ENSRNOT00000004010.6	-0.23	0.10	0.33	1.91	-2.90	-0.99	2.11E-08	586.16	1162.12	13.13	112.12
ENSRNOT00000001953	Ssc4d	ENSRNOT00000001953.2	ENSRNOT00000001953.6	-0.81	0.00	0.81	6.64	-4.60	2022-04-02	3.26E-31	199.70	46.36	0.00	53.54
ENSRNOT00000001953	Ssc4d	ENSRNOT00000001953.2	ENSRNOT00000001953.7	-0.77	0.00	0.77	6.32	-4.56	1.76	7.08E-28	199.70	56.57	0.00	51.52
ENSRNOT00000046412	Ift22	ENSRNOT00000046412.0	ENSRNOT00000046412.6	-0.40	0.09	0.49	3.23	-3.30	-0.06	4.49E-16	68.18	70.30	2022-08-08	126.16
ENSRNOT00000043131	AABR06077178.1	ENSRNOT00000043131.3	ENSRNOT00000043131.5	-0.21	0.09	0.30	3.68	-4.89	-1.22	2.23E-10	59.49	143.94	27.27	322.32
ENSRNOT00000026324	Pcdh1	ENSRNOT00000026324.2	ENSRNOT00000026324.7	-0.25	0.02	0.28	2.29	-3.71	-1.42	4.61E-04	103.23	267.88	2022-01-01	36.36
ENSRNOT00000067113	Gria2	ENSRNOT00000067113.1	ENSRNOT00000067113.9	-0.31	0.21	0.52	2022-05-02	-1.92	0.13	2.55E-51	14687.78	13714.95	144.95	505.76
ENSRNOT00000075083	Atp5f1	ENSRNOT00000075083.0	ENSRNOT00000075083.5	-0.87	0.08	0.95	8.27	-3.87	4.40	0.00E+00	52069.29	2450-10-01	819.39	13885.25
ENSRNOT00000009308	Mrpl19	ENSRNOT00000009308.0	ENSRNOT00000009308.6	-0.32	0.00	0.33	9.69	-10.74	-1.04	0.00E+00	276.57	570.61	43.43	31928.28
ENSRNOT00000040576	Ptpro	ENSRNOT00000040576.1	ENSRNOT00000040576.3	-0.45	0.23	0.69	2.88	-1.75	1.13	2.06E-19	7251.92	3328.38	2022-06-16	66.57
ENSRNOT00000007374	Hpcal1	ENSRNOT00000007374.1	ENSRNOT00000007374.5	-0.29	0.42	0.71	1.93	-0.64	1.29	1.02E-08	8840.00	3608.99	107.88	102.02
ENSRNOT00000006791	Tmem74	ENSRNOT00000006791.3	ENSRNOT00000006791.4	-0.19	0.09	0.28	2.87	-4.25	-1.39	4.85E-38	3881.62	10200.30	2022-08-08	362.42
ENSRNOT00000012317	Rnf126	ENSRNOT00000012317.0	ENSRNOT00000012317.8	-0.47	0.37	0.84	2022-06-03	-0.69	2.37	1.07E-09	333.03	63.64	20.20	29.29
ENSRNOT00000059159	LOC685203	ENSRNOT00000059159.2	ENSRNOT00000059159.5	-0.47	0.18	0.66	3.25	-2.32	0.93	1.84E-68	4395.15	2322.53	38.28	243.23
ENSRNOT00000064368	RragB	ENSRNOT00000064368.2	ENSRNOT00000064368.3	-0.19	0.21	0.39	1.29	-1.94	-0.64	1.60E-15	3791.31	5825.45	77.68	314.75
ENSRNOT00000064368	RragB	ENSRNOT00000064368.2	ENSRNOT00000064368.4	-0.19	0.37	0.57	1.14	-0.75	0.39	4.24E-08	3791.31	2852-02-01	77.68	132.32
ENSRNOT00000024850	Trim3	ENSRNOT00000024850.1	ENSRNOT00000024850.4	-0.30	0.37	0.67	1.76	-0.76	1.00	9.34E-06	1540.61	769.09	27.27	42.42
ENSRNOT00000003106	Hnrnpdl	ENSRNOT00000003106.0	ENSRNOT00000003106.2	-0.17	0.22	0.39	1.16	-1.80	-0.63	3.12E-16	1981.21	3082.53	107.07	402.93
ENSRNOT00000009587	Tmx1	ENSRNOT00000009587.1	ENSRNOT00000009587.6	-0.39	0.06	0.45	3.81	-4.12	-0.30	5.64E-44	2012.53	2488.79	15.15	254.34
ENSRNOT00000015769	Sat2	ENSRNOT00000015769.0	ENSRNOT00000015769.2	-0.16	0.54	0.70	2022-02-01	0.22	1.24	2.48E-06	979.19	413.33	97.98	89.80
ENSRNOT00000024543	Nkiras2	ENSRNOT00000024543.0	ENSRNOT00000024543.4	-0.48	0.00	0.48	10.21	-10.35	-0.14	0.00E+00	4696-06-01	5213.13	2022-08-08	13175.66
ENSRNOT00000057503	Pirt	ENSRNOT00000057503.2	ENSRNOT00000057503.5	-0.43	0.13	0.56	2.95	-2.63	0.32	1.01E-22	1869.49	1503.33	16.97	115.15
ENSRNOT00000002738	Alcam	ENSRNOT00000002738.1	ENSRNOT00000002738.7	-0.31	0.10	0.40	2.82	-3.37	-0.56	1.92E-06	2670.91	3925.66	2022-05-05	49.39
ENSRNOT00000021920	LOC100911417	ENSRNOT00000021920.0	ENSRNOT00000021920.4	-0.87	0.08	0.95	8.27	-3.87	4.40	0.00E+00	52082.22	2450-10-01	819.39	13884.14
ENSRNOT00000067113	Gria2	ENSRNOT00000067113.1	ENSRNOT00000067113.10	-0.37	0.30	0.67	2.27	-1.21	2022-05-01	3.22E-45	14687.78	7354-04-01	144.95	295.76
ENSRNOT00000037409	LOC100910755	ENSRNOT00000037409.0	ENSRNOT00000037409.3	-0.16	0.04	0.20	2.19	-4.21	-2.02	5.90E-04	145.25	606.06	2022-02-02	63.64
ENSRNOT00000030750	Nup160	ENSRNOT00000030750.2	ENSRNOT00000030750.7	-0.70	0.00	0.70	2022-04-09	-7.79	1.25	0.00E+00	994.75	423.33	2022-03-03	923.33
ENSRNOT00000057826	Dusp19	ENSRNOT00000057826.0	ENSRNOT00000057826.4	-0.25	0.00	0.25	4.66	-6.24	-1.58	5.19E-39	163.13	500.20	2022-03-03	500.81
ENSRNOT00000009752	LOC500034	ENSRNOT00000009752.0	ENSRNOT00000009752.9	-0.74	0.00	0.75	2022-03-09	-7.47	1.56	0.00E+00	1193.94	409.80	2022-05-05	1176.36
ENSRNOT00000023825	AABR06055554.1	ENSRNOT00000023825.2	ENSRNOT00000023825.5	-0.25	0.44	0.68	1.47	-0.35	2022-12-01	6.92E-09	7524.14	3492.93	127.98	128.28
ENSRNOT00000026938	Eml3	ENSRNOT00000026938.1	ENSRNOT00000026938.2	-0.19	0.05	0.25	2022-12-02	-3.73	-1.61	2.05E-06	795.76	2425.76	2022-04-04	83.84
ENSRNOT00000027574	Sh3pxd2a	ENSRNOT00000027574.2	ENSRNOT00000027574.8	-0.49	0.06	0.55	2022-01-05	-4.72	0.30	0.00E+00	4271.62	3473.33	342.42	9057.88
ENSRNOT00000028331	Frmd8	ENSRNOT00000028331.0	ENSRNOT00000028331.6	-0.57	0.16	0.74	4.51	-3.03	1.49	0.00E+00	15286.36	5450-10-01	158.28	1295.76
ENSRNOT00000050617	Cacul1	ENSRNOT00000050617.1	ENSRNOT00000050617.6	-0.23	0.02	0.25	3.79	-5.36	-1.57	8.22E-29	3005.15	8929.60	2022-05-05	292.83
ENSRNOT00000055120	Pik3c2a	ENSRNOT00000055120.1	ENSRNOT00000055120.4	-0.42	0.00	0.42	4.59	-5.06	-0.47	1.40E-27	480.40	663.84	2022-01-01	134.24
ENSRNOT00000068082	Pdzd8	ENSRNOT00000068082.1	ENSRNOT00000068082.3	-0.24	0.00	0.25	4.61	-6.22	-1.61	4.53E-26	1364.65	4173.13	2022-01-01	234.04
ENSRNOT00000068457	Tmem181	ENSRNOT00000068457.0	ENSRNOT00000068457.6	-0.48	0.06	0.54	3.95	-3.70	0.25	2.73E-54	4794.85	4034.44	13.13	214.55
ENSRNOT00000021368	Taok1	ENSRNOT00000021368.0	ENSRNOT00000021368.6	-0.21	0.05	0.26	2.48	-4.00	-1.53	3.84E-24	1652.22	4672.32	17.17	336.36
ENSRNOT00000028368	Lsm12	ENSRNOT00000028368.1	ENSRNOT00000028368.2	-0.36	0.17	0.52	2.78	-2.64	0.14	1.36E-42	665.05	602.73	72.53	376.26
ENSRNOT00000041493	Kif1c	ENSRNOT00000041493.0	ENSRNOT00000041493.4	-0.25	0.43	0.68	1.50	-0.42	2022-08-01	1.99E-13	235.66	113.43	552.73	679.49
ENSRNOT00000054970	Mafg	ENSRNOT00000054970.0	ENSRNOT00000054970.2	-0.35	0.41	0.76	2.38	-0.67	1.71	6.17E-54	14176.36	4286.46	390.30	384.75
ENSRNOT00000076664	Ebf1	ENSRNOT00000076664.0	ENSRNOT00000076664.3	-0.67	0.16	0.83	4.59	-2.23	2.36	1.03E-30	2235.86	410.10	2022-07-07	49.49
ENSRNOT00000002478	Dnm1l	ENSRNOT00000002478.1	ENSRNOT00000002478.4	-0.18	0.02	0.20	2022-10-03	-5.07	-1.97	1.77E-14	2804.95	10996.46	2022-04-04	201.82
ENSRNOT00000034757	LOC690251	ENSRNOT00000034757.2	ENSRNOT00000034757.5	-0.55	0.03	0.58	5.39	-4.91	0.47	2.19E-76	1544.44	1146.57	2022-05-05	247.37
ENSRNOT00000000074	Fbxo28	ENSRNOT00000000074.0	ENSRNOT00000000074.4	-0.20	0.00	0.20	2022-12-04	-6.10	-1.98	1.26E-12	319.80	1269.09	0.00	137.27
ENSRNOT00000007002	Slc1a4	ENSRNOT00000007002.1	ENSRNOT00000007002.4	-0.19	0.04	0.23	2.51	-4.26	-1.76	1.24E-09	1130.51	3815.56	2022-05-05	135.56
ENSRNOT00000022902	Prpf4b	ENSRNOT00000022902.0	ENSRNOT00000022902.5	-0.43	0.07	0.49	4.70	-4.75	-0.05	2.06E-131	1803.33	1924.65	2022-06-06	550.81
ENSRNOT00000024022	Arhgap12	ENSRNOT00000024022.2	ENSRNOT00000024022.5	-0.18	0.01	0.18	4.38	-6.55	-2.18	3.54E-28	1919.19	8685-05-01	2022-03-03	389.60
ENSRNOT00000057572	Abi1	ENSRNOT00000057572.1	ENSRNOT00000057572.6	-0.36	0.21	0.57	2.63	-2.23	0.40	9.45E-27	4620.61	3503.94	76.46	223.54
ENSRNOT00000022410	Rnmt	ENSRNOT00000022410.1	ENSRNOT00000022410.5	-0.18	0.00	0.18	2022-06-04	-6.20	-2.14	1.05E-23	987.98	4360.20	2022-02-02	316.16
ENSRNOT00000033663	Mtcp1	ENSRNOT00000033663.2	ENSRNOT00000033663.4	-0.17	0.00	0.17	3.63	-5.89	-2.26	7.67E-14	199.49	960.91	0.00	185.76
ENSRNOT00000010344	Mynn	ENSRNOT00000010344.1	ENSRNOT00000010344.6	-0.19	0.06	0.25	2.13	-3.75	-1.62	2.22E-10	720.20	2162.73	2022-10-20	226.06
ENSRNOT00000017379	Naa15	ENSRNOT00000017379.1	ENSRNOT00000017379.4	-0.27	0.05	0.32	2.93	-4.00	-1.07	4.98E-13	464.44	975.56	2022-05-05	117.27
ENSRNOT00000018877	Il6st	ENSRNOT00000018877.1	ENSRNOT00000018877.3	-0.15	0.02	0.17	3.53	-5.83	-2.30	1.88E-17	473.74	2313.74	2022-01-01	249.90
ENSRNOT00000020829	RGD1305938	ENSRNOT00000020829.3	ENSRNOT00000020829.5	-0.23	0.09	0.32	2.38	-3.45	-1.07	2.72E-35	6787.27	14233.94	66.46	558.28
ENSRNOT00000022507	Wwtr1	ENSRNOT00000022507.4	ENSRNOT00000022507.5	-0.30	0.12	0.42	2.75	-3.24	-0.49	4.73E-09	297.58	423.43	63.64	231.01
ENSRNOT00000028760	Sv2a	ENSRNOT00000028760.1	ENSRNOT00000028760.3	-0.17	0.14	0.31	1.31	-2.45	-1.14	2.35E-03	4981.92	10982.53	2022-08-08	53.54
ENSRNOT00000041529	Csde1	ENSRNOT00000041529.1	ENSRNOT00000041529.3	-0.22	0.09	0.31	2.19	-3.31	-1.12	2.61E-38	8993.23	19570.51	70.71	621.52
ENSRNOT00000045837	Ankrd50	ENSRNOT00000045837.0	ENSRNOT00000045837.4	-0.16	0.08	0.24	2.25	-3.95	-1.70	1.64E-15	1572.83	5076.97	2022-04-04	178.59
ENSRNOT00000066004	Dclk2	ENSRNOT00000066004.1	ENSRNOT00000066004.3	-0.18	0.18	0.36	1.36	-2.21	-0.86	1.64E-15	994.65	1817.88	91.92	423.54
ENSRNOT00000070919	Golph3l	ENSRNOT00000070919.1	ENSRNOT00000070919.4	-0.33	0.01	0.34	4.73	-5.68	-0.95	3.43E-49	1371.41	2655.96	2022-04-04	327.88
ENSRNOT00000009430	Mapkbp1	ENSRNOT00000009430.2	ENSRNOT00000009430.4	-0.25	0.09	0.33	2.55	-3.56	-1.01	5.05E-06	211.72	404.24	13.13	92.83
ENSRNOT00000011551	Secisbp2l	ENSRNOT00000011551.1	ENSRNOT00000011551.7	-0.23	0.07	0.29	2.51	-3.77	-1.26	3.92E-26	2749.39	6589.19	2022-07-17	303.74
ENSRNOT00000028888	Cds2	ENSRNOT00000028888.2	ENSRNOT00000028888.4	-0.28	0.09	0.36	3.30	-4.10	-0.81	2.59E-24	3647.68	6373-03-01	2022-05-05	160.51
ENSRNOT00000036251	Fnbp1	ENSRNOT00000036251.3	ENSRNOT00000036251.8	-0.23	0.02	0.26	3.29	-4.84	-1.55	1.16E-26	2156.77	6330.30	2022-06-06	281.31
ENSRNOT00000050513	Atf2	ENSRNOT00000050513.2	ENSRNOT00000050513.5	-0.32	0.07	0.39	2.91	-3.55	-0.64	1.67E-39	5822.73	9002.93	34.95	352.93
ENSRNOT00000056405	Chp1	ENSRNOT00000056405.0	ENSRNOT00000056405.3	-0.28	0.72	1.00	7.24	1.71	8.95	0.00E+00	40382.83	81.72	1971.21	786.67
ENSRNOT00000064083	Sec16a	ENSRNOT00000064083.2	ENSRNOT00000064083.5	-0.17	0.02	0.19	3.70	-5.81	-2.11	6.72E-23	806.97	3482-12-01	2022-04-04	331.92
ENSRNOT00000068018	Lnp	ENSRNOT00000068018.0	ENSRNOT00000068018.9	-0.25	0.00	0.25	5.52	-7.07	-1.55	2.88E-45	840.71	2485.45	0.91	401.52
ENSRNOT00000029332	Mpp6	ENSRNOT00000029332.0	ENSRNOT00000029332.3	-0.22	0.01	0.23	2022-04-04	-5.81	-1.78	1.90E-24	460.00	1571.01	2022-03-03	281.82
ENSRNOT00000011731	Jun	ENSRNOT00000011731.2	ENSRNOT00000011731.7	-0.45	0.26	0.71	3.20	-1.91	1.29	1.34E-10	1261.72	511.72	13.13	38.38
ENSRNOT00000021864	Camk2n1	ENSRNOT00000021864.0	ENSRNOT00000021864.2	-0.19	0.08	0.27	2022-04-02	-3.51	-1.48	1.22E-140	3196.57	9042.73	288.99	3374.95
ENSRNOT00000074374	Phactr4	ENSRNOT00000074374.3	ENSRNOT00000074374.7	-0.53	0.25	0.78	2022-04-05	-3.24	1.79	0.00E+00	6567.58	1889.39	229.19	996.16
ENSRNOT00000075457	Ski	ENSRNOT00000075457.2	ENSRNOT00000075457.7	-0.23	0.32	0.55	1.64	-1.33	0.31	5.96E-06	801.82	649.29	26.46	61.62
ENSRNOT00000005439	Pnn	ENSRNOT00000005439.1	ENSRNOT00000005439.3	-0.21	0.03	0.23	4.23	-5.96	-1.73	1.79E-60	2184.75	7241.21	2022-11-21	810.71
ENSRNOT00000013043	Nampt	ENSRNOT00000013043.1	ENSRNOT00000013043.3	-0.54	0.16	0.70	3.58	-2.32	1.25	3.93E-96	8989.60	3771.62	58.59	301.01
ENSRNOT00000049770	Ahr	ENSRNOT00000049770.3	ENSRNOT00000049770.6	-0.42	0.28	0.70	2.92	-1.67	1.26	2.44E-66	4631.52	1900.61	136.26	318.59
ENSRNOT00000057601	Eml5	ENSRNOT00000057601.2	ENSRNOT00000057601.3	-0.17	0.00	0.17	2.34	-4.66	-2.32	1.42E-04	768.59	3860.91	0.00	55.45
ENSRNOT00000064208	Syt16	ENSRNOT00000064208.2	ENSRNOT00000064208.4	-0.15	0.20	0.35	2022-03-01	-1.93	-0.90	1.12E-05	5334.55	10020.91	26.16	121.92
ENSRNOT00000065396	Etv1	ENSRNOT00000065396.1	ENSRNOT00000065396.3	-0.46	0.19	0.66	2022-09-03	-2.14	0.95	5.77E-35	10298.59	5250.30	25.25	126.16
ENSRNOT00000005624	Fzr1	ENSRNOT00000005624.0	ENSRNOT00000005624.2	-0.18	0.02	0.20	1.96	-3.97	-2.00	2.65E-03	659.70	2652.93	2022-01-01	42.42
ENSRNOT00000041065	Mtdh	ENSRNOT00000041065.2	ENSRNOT00000041065.4	-0.17	0.04	0.21	2022-12-02	-4.04	-1.92	1.23E-05	1242.22	4706-06-01	2022-04-04	91.62
ENSRNOT00000065137	Hmga2	ENSRNOT00000065137.4	ENSRNOT00000065137.5	-0.31	0.02	0.33	3.32	-4.35	-1.02	1.04E-07	79.29	159.29	2022-01-01	56.57
ENSRNOT00000013581	Arih1	ENSRNOT00000013581.1	ENSRNOT00000013581.10	-0.48	0.00	0.48	5.53	-5.64	-0.12	4.72E-26	460.61	501.52	0.00	98.89
ENSRNOT00000024828	Pafah1b2	ENSRNOT00000024828.0	ENSRNOT00000024828.3	-0.21	0.36	0.57	1.59	-1.18	0.41	7.12E-15	13939.70	10483.33	190.91	298.89
ENSRNOT00000024828	Pafah1b2	ENSRNOT00000024828.0	ENSRNOT00000024828.4	-0.25	0.61	0.85	1.93	0.62	2.54	8.86E-23	13939.70	2407.68	190.91	117.78
ENSRNOT00000066731	Clstn2	ENSRNOT00000066731.2	ENSRNOT00000066731.4	-0.23	0.05	0.27	2.16	-3.59	-1.43	5.26E-05	1386.57	3763.74	2022-02-02	50.40
ENSRNOT00000021762	Gltscr1l	ENSRNOT00000021762.3	ENSRNOT00000021762.4	-0.17	0.19	0.36	2022-10-01	-1.90	-0.80	1.84E-04	5424.44	9464.85	14.14	70.61
ENSRNOT00000027622	Hdac4	ENSRNOT00000027622.3	ENSRNOT00000027622.5	-0.15	0.00	0.15	2022-06-03	-5.53	-2.47	1.44E-07	180.40	1005.96	0.00	110.10
ENSRNOT00000035277	Tns1	ENSRNOT00000035277.2	ENSRNOT00000035277.5	-0.46	0.34	0.81	3.15	-1.11	2022-04-02	1.60E-15	447.58	107.47	32.32	55.45
ENSRNOT00000045096	Efna5	ENSRNOT00000045096.2	ENSRNOT00000045096.6	-0.17	0.43	0.59	2022-05-01	-0.50	0.55	1.64E-16	5953.23	4038.79	59.60	141.41
ENSRNOT00000050179	Abi2	ENSRNOT00000050179.1	ENSRNOT00000050179.5	-0.28	0.03	0.31	3.69	-4.87	-1.18	1.00E-39	2662.83	5994.34	2022-04-14	373.43
ENSRNOT00000051155	Hdlbp	ENSRNOT00000051155.0	ENSRNOT00000051155.3	-0.16	0.28	0.45	1.62	-1.94	-0.32	7.13E-50	11793.43	14599.39	151.52	645.66
ENSRNOT00000075279	Mut	ENSRNOT00000075279.2	ENSRNOT00000075279.5	-0.18	0.15	0.33	1.58	-2.58	-1.01	1.33E-74	1893.43	3823.64	517.98	2774.14
ENSRNOT00000058134	Eif2s3y	ENSRNOT00000058134.1	ENSRNOT00000058134.3	-0.17	0.09	0.26	1.72	-3.26	-1.55	1.43E-17	3906.87	11500.10	37.37	390.71
ENSRNOT00000065023	Cul4b	ENSRNOT00000065023.1	ENSRNOT00000065023.7	-0.28	0.06	0.34	2.78	-3.73	-0.95	1.28E-23	3679.39	7110.51	2022-08-08	188.79
ENSRNOT00000020329	Siah1	ENSRNOT00000020329.0	ENSRNOT00000020329.2	-0.21	0.02	0.23	2.00	-3.73	-1.73	1.46E-03	1197.88	3978-08-01	2022-01-01	38.18
ENSRNOT00000061950	Hspa1a	ENSRNOT00000061950.2	ENSRNOT00000061950.5	-0.86	0.05	0.91	7.73	-4.42	3.30	2.36E-184	3113.23	305.96	2022-09-09	214.04
ENSRNOT00000061950	Hspa1a	ENSRNOT00000061950.2	ENSRNOT00000061950.6	-0.76	0.02	0.78	7.57	-5.76	1.81	7.17E-290	3113.23	867.17	2022-09-09	534.55
ENSRNOT00000009752	LOC500034	ENSRNOT00000009752.0	ENSRNOT00000009752.2	-0.25	0.14	0.39	2022-04-02	-2.69	-0.65	3.83E-05	1193.94	1884.04	2022-05-05	43.43
ENSRNOT00000011985	Cyp4x1	ENSRNOT00000011985.2	ENSRNOT00000011985.5	-0.24	0.38	0.62	1.37	-0.66	0.71	3.78E-08	3030.00	1861.82	42.22	75.76
ENSRNOT00000027118	Wbp1l	ENSRNOT00000027118.1	ENSRNOT00000027118.4	-0.18	0.14	0.31	2.57	-3.70	-1.13	1.71E-08	713.23	1564.34	2022-05-05	84.75
ENSRNOT00000073005	Srsf1	ENSRNOT00000073005.1	ENSRNOT00000073005.3	-0.16	0.03	0.19	2.76	-4.85	-2.09	4.76E-17	1440.10	6061.21	2022-02-02	221.62
ENSRNOT00000004949	Brox	ENSRNOT00000004949.1	ENSRNOT00000004949.4	-0.16	0.07	0.23	1.93	-3.67	-1.74	6.00E-17	1861.21	6214.85	2022-10-10	252.42
ENSRNOT00000074446	Sub1	ENSRNOT00000074446.1	ENSRNOT00000074446.3	-0.28	0.61	0.88	2.28	0.62	2.90	7.4900351909533e-321	68130.71	9085.45	1923.23	1244.75
ENSRNOT00000028331	Frmd8	ENSRNOT00000028331.0	ENSRNOT00000028331.4	-0.50	0.41	0.91	3.86	-0.55	3.31	1.33E-100	15286.36	1535.45	158.28	194.85
ENSRNOT00000008982	Fam101b	ENSRNOT00000008982.1	ENSRNOT00000008982.3	-0.17	0.08	0.25	2022-07-02	-3.66	-1.59	3.63E-54	217.47	665.56	1606.16	20901.11
ENSRNOT00000034723	Stk24	ENSRNOT00000034723.0	ENSRNOT00000034723.5	-0.42	0.13	0.55	2.95	-2.63	0.32	6.40E-28	11552.83	9297.78	2022-11-21	139.90
ENSRNOT00000060696	Prob1	ENSRNOT00000060696.2	ENSRNOT00000060696.4	-0.31	0.00	0.31	2022-03-05	-6.17	-1.14	4.99E-22	211.62	470.10	0.00	155.56
ENSRNOT00000060311	Tcp11l1	ENSRNOT00000060311.1	ENSRNOT00000060311.10	-0.25	0.01	0.26	3.80	-5.32	-1.52	3.33E-19	575.15	1646.77	2022-03-03	189.90
ENSRNOT00000007769	Pcmtd1	ENSRNOT00000007769.2	ENSRNOT00000007769.3	-0.20	0.02	0.22	3.34	-5.20	-1.86	7.83E-15	1195.35	4318.79	2.93	181.72
ENSRNOT00000074166	Aplp2	ENSRNOT00000074166.1	ENSRNOT00000074166.3	-0.40	0.14	0.54	2.97	-2.76	0.21	1.30E-32	5582.83	4860.00	2022-01-31	189.29
Table S16 : Promoter-distal shifts in NGF-treated axons as compared to cell bodies. Columns represent: 1- Ensembl Rn5 transcript ID, 2- Rat Rn5 gene symbol, 3- promoter-proximal (Ip) 3’ UTR isoform ID, 4- promoter-distal (Id) 3’ UTR isoform ID, 5- difference in relative promoter-proximal usage between axons and cell bodies in NGF, 6- relative promoter-proximal usage in NGF axons, 7- relative prom…
