# Supplementary material for: The predicted RNA-binding protein regulome of axonal mRNAs
Source: HighWire-hosted journal article supplement (doi:10.1101/gr.277804.123), 2023-08-15
Supplement: Supplemental_Tables.zip [file Supplemental Table S17.xlsx]

## Sheet: Sheet1
txID	geneSymbol	imIDp	uniqueID	dPUD(Ip/(Ip+Id))	mPUD.axon	mPUD.cb	dRUD(Id/Ip)	mRUD.axon	mRUD.cb	FDR	proxi.cb	dist.cb	proxi.ax	dist.ax
ENSRNOT00000018107	Ngrn	ENSRNOT00000018107.1	ENSRNOT00000018107.0	-0.16	0.26	0.42	2022-03-01	-1.47	-0.44	2.00E-10	9394.55	12739.70	120.00	321.62
ENSRNOT00000068084	Ap3s2	ENSRNOT00000068084.1	ENSRNOT00000068084.0	-0.18	0.19	0.37	2.34	-3.10	-0.76	2.35E-05	995.96	1726.77	2022-08-08	59.60
ENSRNOT00000023920	Bgn	ENSRNOT00000023920.1	ENSRNOT00000023920.0	-0.37	0.12	0.49	2.82	-2.89	-0.07	1.53E-06	301.11	312.02	13.13	58.28
ENSRNOT00000056998	Pld2	ENSRNOT00000056998.1	ENSRNOT00000056998.0	-0.50	0.45	0.95	6.53	-2.28	4.24	1.36E-106	934.04	48.38	2022-09-09	119.09
ENSRNOT00000013046	Ddx42	ENSRNOT00000013046.1	ENSRNOT00000013046.0	-0.16	0.11	0.26	2.19	-3.68	-1.49	1.02E-05	3473.64	9749.29	14.65	129.39
ENSRNOT00000050223	H3f3b	ENSRNOT00000050223.1	ENSRNOT00000050223.0	-0.20	0.48	0.68	1.21	-0.13	2022-08-01	3.05E-37	33963.84	16026.97	650.40	641.72
ENSRNOT00000066534	Rbfox1	ENSRNOT00000066534.1	ENSRNOT00000066534.0	-0.19	0.24	0.42	1.40	-1.85	-0.45	9.32E-18	5932.53	8115-05-01	44.14	220.00
ENSRNOT00000006407	Crk	ENSRNOT00000006407.1	ENSRNOT00000006407.0	-0.17	0.26	0.44	1.76	-2.13	-0.37	4.71E-24	5215.66	6703.74	31.72	214.14
ENSRNOT00000054955	Alyref	ENSRNOT00000054955.1	ENSRNOT00000054955.0	-0.24	0.13	0.37	2022-02-02	-2.79	-0.77	4.73E-08	542.12	927.07	2022-06-26	138.99
ENSRNOT00000073321	Fasn	ENSRNOT00000073321.1	ENSRNOT00000073321.0	-0.20	0.17	0.37	1.74	-2.52	-0.78	5.83E-05	3098.59	5329.49	2022-11-11	65.66
ENSRNOT00000068345	Naa50	ENSRNOT00000068345.1	ENSRNOT00000068345.0	-0.31	0.21	0.52	1.91	-1.78	0.14	2.35E-03	755.35	672.63	8.99	27.27
ENSRNOT00000075674	Nucks1	ENSRNOT00000075674.1	ENSRNOT00000075674.0	-0.29	0.06	0.35	2022-01-03	-3.92	-0.91	1.19E-15	1780.10	3344.34	2022-02-12	153.54
ENSRNOT00000036110	Rbbp5	ENSRNOT00000036110.1	ENSRNOT00000036110.0	-0.29	0.14	0.42	2022-01-02	-2.46	-0.45	8.01E-03	2302.73	3133.54	2022-07-07	30.20
ENSRNOT00000071482	Tor1aip2	ENSRNOT00000071482.1	ENSRNOT00000071482.0	-0.60	0.05	0.65	5.51	-4.62	0.90	1.84E-165	8300.40	4443.64	27.17	462.53
ENSRNOT00000011158	Nipsnap1	ENSRNOT00000011158.1	ENSRNOT00000011158.0	-0.18	0.09	0.28	1.88	-3.27	-1.39	1.87E-29	3500.30	9019.70	67.68	625.25
ENSRNOT00000021621	Ccdc25	ENSRNOT00000021621.1	ENSRNOT00000021621.0	-0.58	0.09	0.67	4.78	-3.74	2022-04-01	3.89E-26	1756.77	854.65	5.96	71.41
ENSRNOT00000027343	Pcdhac1	ENSRNOT00000027343.1	ENSRNOT00000027343.0	-0.25	0.10	0.35	2.13	-3.02	-0.88	1.50E-61	18359.19	33462.63	86.87	760.30
ENSRNOT00000056237	Lix1l	ENSRNOT00000056237.1	ENSRNOT00000056237.0	-0.22	0.04	0.26	2.49	-3.97	-1.48	7.59E-30	1591.62	4450.40	2022-12-22	424.44
ENSRNOT00000025994	Gstm4	ENSRNOT00000025994.1	ENSRNOT00000025994.0	-0.25	0.12	0.38	2022-09-02	-2.80	-0.71	1.16E-14	1787.47	2924.65	44.34	236.36
ENSRNOT00000057078	Atg5	ENSRNOT00000057078.1	ENSRNOT00000057078.0	-0.22	0.11	0.33	2.35	-3.34	-0.99	1.37E-14	2189.80	4360.71	2022-09-09	139.39
ENSRNOT00000067318	Arhgap1	ENSRNOT00000067318.1	ENSRNOT00000067318.0	-0.27	0.24	0.51	1.81	-1.75	0.05	9.42E-03	3037-07-01	2925.76	18.18	39.39
ENSRNOT00000018454	Sec61a1	ENSRNOT00000018454.1	ENSRNOT00000018454.0	-0.16	0.06	0.23	2.29	-4.07	-1.78	2.30E-04	494.95	1698.99	7.78	97.88
ENSRNOT00000010893	Tcea1	ENSRNOT00000010893.1	ENSRNOT00000010893.0	-0.21	0.08	0.30	2.13	-3.37	-1.24	7.83E-06	1528.59	3677.47	2022-10-10	92.83
ENSRNOT00000034926	Cln6	ENSRNOT00000034926.1	ENSRNOT00000034926.0	-0.23	0.04	0.27	2.90	-4.30	-1.41	2.88E-08	440.81	1176.97	2022-07-07	114.04
ENSRNOT00000071664	Rhoa	ENSRNOT00000071664.1	ENSRNOT00000071664.0	-0.32	0.24	0.57	2022-02-02	-1.64	0.38	7.74E-33	19005.76	14612.83	127.07	324.85
ENSRNOT00000021309	Agfg1	ENSRNOT00000021309.1	ENSRNOT00000021309.0	-0.30	0.35	0.64	2.25	-1.40	0.85	2.94E-11	6535.66	3627.58	36.36	76.46
ENSRNOT00000006484	Zdhhc9	ENSRNOT00000006484.1	ENSRNOT00000006484.0	-0.24	0.10	0.34	2.70	-3.63	-0.93	1.43E-14	1274.04	2407.68	60.61	325.35
ENSRNOT00000019987	Acer3	ENSRNOT00000019987.2	ENSRNOT00000019987.6	-0.42	0.05	0.46	3.68	-3.91	-0.23	4.30E-63	1656.26	1936.57	2022-12-12	318.99
ENSRNOT00000025355	Rgs17	ENSRNOT00000025355.1	ENSRNOT00000025355.8	-0.21	0.11	0.32	1.41	-2.60	-1.18	1.33E-08	6148.89	12186.57	18.18	129.90
ENSRNOT00000026316	Pc	ENSRNOT00000026316.1	ENSRNOT00000026316.3	-0.21	0.20	0.41	1.30	-1.84	-0.55	5.71E-05	1047.58	1544.04	14.14	65.56
ENSRNOT00000026754	Hdgfrp3	ENSRNOT00000026754.1	ENSRNOT00000026754.7	-0.19	0.07	0.26	2.92	-4.41	-1.49	3.39E-09	1393.94	3920.61	2022-07-07	125.25
ENSRNOT00000044778	Stxbp5	ENSRNOT00000044778.2	ENSRNOT00000044778.6	-0.15	0.18	0.33	2022-05-02	-3.04	-1.00	3.93E-42	1818.18	3636.87	15.86	370.20
ENSRNOT00000066791	Gtf2h1	ENSRNOT00000066791.1	ENSRNOT00000066791.4	-0.28	0.17	0.45	2.30	-2.58	-0.28	3.50E-06	1244.44	1523.94	2022-08-08	49.29
ENSRNOT00000003492	Heatr6	ENSRNOT00000003492.0	ENSRNOT00000003492.5	-0.31	0.01	0.31	4.18	-5.32	-1.13	7.89E-17	340.20	744.14	2022-01-01	122.12
ENSRNOT00000071153	Prkar1a	ENSRNOT00000071153.0	ENSRNOT00000071153.3	-0.17	0.09	0.26	1.90	-3.43	-1.53	2.82E-99	22268.28	64186.87	264.65	2514.34
ENSRNOT00000001415	Elavl1	ENSRNOT00000001415.1	ENSRNOT00000001415.8	-0.15	0.05	0.21	2.64	-4.57	-1.94	2.88E-08	310.61	1188.18	2022-02-02	110.91
ENSRNOT00000042117	Pdgfa	ENSRNOT00000042117.0	ENSRNOT00000042117.3	-0.60	0.34	0.94	5.53	-1.59	3.94	1.31E-19	5593.33	361.52	21.21	27.17
ENSRNOT00000004520	Actr3	ENSRNOT00000004520.1	ENSRNOT00000004520.5	-0.28	0.10	0.38	2.71	-3.40	-0.70	1.78E-96	13406.97	21708.59	90.40	921.52
ENSRNOT00000035145	Stx6	ENSRNOT00000035145.1	ENSRNOT00000035145.4	-0.18	0.01	0.19	2.57	-4.66	-2.09	5.08E-17	1315.76	5632.73	2022-07-07	287.68
ENSRNOT00000011158	Nipsnap1	ENSRNOT00000011158.1	ENSRNOT00000011158.3	-0.24	0.07	0.31	2.50	-3.67	-1.18	1.42E-79	3500.30	7780.71	67.68	991.52
ENSRNOT00000000124	Champ1	ENSRNOT00000000124.1	ENSRNOT00000000124.2	-0.33	0.22	0.55	2022-03-02	-1.72	0.30	2.70E-06	2474.75	2008.48	2022-06-16	49.39
ENSRNOT00000014492	Nrp1	ENSRNOT00000014492.0	ENSRNOT00000014492.4	-0.15	0.02	0.17	2.97	-5.52	-2.55	1.30E-22	3594.14	15850.81	8.99	389.60
ENSRNOT00000055533	Cks1b	ENSRNOT00000055533.1	ENSRNOT00000055533.4	-0.27	0.17	0.44	1.92	-2.25	-0.33	4.13E-19	1157.17	1450.81	32.32	188.79
ENSRNOT00000061950	Hspa1a	ENSRNOT00000061950.2	ENSRNOT00000061950.7	-0.51	0.07	0.57	4.65	-4.23	0.42	1.11E-70	2927.47	2182.63	17.17	264.04
ENSRNOT00000006549	Prpf40a	ENSRNOT00000006549.1	ENSRNOT00000006549.5	-0.19	0.05	0.23	1.96	-3.68	-1.71	4.35E-05	766.67	2515.86	1.82	62.63
ENSRNOT00000012428	Caprin1	ENSRNOT00000012428.0	ENSRNOT00000012428.2	-0.29	0.47	0.76	1.89	-0.26	1.63	2.22E-08	21357.58	6909-09-01	136.16	97.78
ENSRNOT00000045845	Oprl1	ENSRNOT00000045845.0	ENSRNOT00000045845.5	-0.29	0.27	0.56	2.88	-2.52	0.35	7.35E-32	6007-07-01	4731.52	2022-04-24	158.89
ENSRNOT00000045311	Nub1	ENSRNOT00000045311.0	ENSRNOT00000045311.2	-0.29	0.22	0.51	2.18	-2.10	0.08	6.31E-20	10755.45	10066.77	164.65	363.33
ENSRNOT00000075273	LOC100360120	ENSRNOT00000075273.0	ENSRNOT00000075273.4	-0.19	0.19	0.38	1.27	-1.96	-0.70	2.28E-07	4919.29	7831.82	39.90	156.16
ENSRNOT00000049822	Tardbp	ENSRNOT00000049822.1	ENSRNOT00000049822.3	-0.37	0.46	0.84	2022-01-03	-0.62	2.39	4.39E-42	10721.41	2092.73	60.10	107.98
ENSRNOT00000009122	Synj2bp	ENSRNOT00000009122.1	ENSRNOT00000009122.5	-0.33	0.04	0.38	3.52	-4.25	-0.74	5.40E-20	868.38	1439.60	2022-02-02	116.77
ENSRNOT00000009175	HNRNPLl	ENSRNOT00000009175.1	ENSRNOT00000009175.4	-0.28	0.27	0.55	2.35	-2.04	0.31	4.96E-12	4604.14	3716-06-01	54.55	133.33
ENSRNOT00000076055	Dnal1	ENSRNOT00000076055.0	ENSRNOT00000076055.3	-0.30	0.06	0.36	2.46	-3.27	-0.81	8.32E-08	627.07	1102.53	2022-03-03	57.27
ENSRNOT00000076882	Dnal1	ENSRNOT00000076882.0	ENSRNOT00000076882.3	-0.30	0.06	0.36	2.46	-3.27	-0.81	8.32E-08	627.07	1102.53	2022-03-03	57.27
ENSRNOT00000052087	Trabd	ENSRNOT00000052087.1	ENSRNOT00000052087.8	-0.31	0.16	0.47	2.14	-2.33	-0.18	1.61E-04	686.36	794.95	2022-05-05	31.21
ENSRNOT00000023459	RGD1307500	ENSRNOT00000023459.2	ENSRNOT00000023459.7	-0.20	0.12	0.32	4.25	-5.36	-1.10	2.47E-83	2036.77	4383.84	6.87	615.45
ENSRNOT00000037521	Foxred1	ENSRNOT00000037521.0	ENSRNOT00000037521.2	-0.21	0.07	0.28	2.38	-3.73	-1.35	1.56E-06	265.56	677.17	2022-01-01	55.45
ENSRNOT00000019486	Bzw1	ENSRNOT00000019486.0	ENSRNOT00000019486.4	-0.21	0.22	0.43	2.27	-2.68	-0.41	2.34E-12	7661-01-01	10166.57	38.38	164.95
ENSRNOT00000019486	Bzw1	ENSRNOT00000019486.0	ENSRNOT00000019486.6	-0.16	0.09	0.25	1.62	-3.19	-1.57	2.02E-35	7661-01-01	22749.70	38.38	594.85
ENSRNOT00000022047	Sumo1	ENSRNOT00000022047.1	ENSRNOT00000022047.2	-0.22	0.12	0.34	1.95	-2.89	-0.94	2.80E-40	7985.35	15324.95	71.11	575.25
ENSRNOT00000029593	Rcan2	ENSRNOT00000029593.2	ENSRNOT00000029593.3	-0.21	0.02	0.23	2.33	-4.08	-1.75	1.38E-09	794.75	2698.38	2022-04-04	130.00
ENSRNOT00000009749	Plin2	ENSRNOT00000009749.0	ENSRNOT00000009749.4	-0.36	0.44	0.80	3.34	-1.32	2022-02-02	7.61E-28	4405.56	1109.39	2022-08-28	72.63
ENSRNOT00000055680	LOC100911485	ENSRNOT00000055680.1	ENSRNOT00000055680.4	-0.31	0.03	0.34	2.96	-3.92	-0.97	1.02E-19	1928.69	4042.73	14.14	208.79
ENSRNOT00000054794	Prune2	ENSRNOT00000054794.0	ENSRNOT00000054794.5	-0.18	0.32	0.51	2022-12-01	-1.07	0.05	3.02E-55	30054.95	28831.41	383.03	928.08
ENSRNOT00000068457	Tmem181	ENSRNOT00000068457.0	ENSRNOT00000068457.7	-0.25	0.40	0.64	1.44	-0.60	0.84	5.66E-03	5102.53	2874.24	24.14	31.21
ENSRNOT00000058619	Fam114a2	ENSRNOT00000058619.2	ENSRNOT00000058619.3	-0.18	0.02	0.20	3.28	-5.30	-2.02	3.91E-13	1789.60	7271.82	2022-06-06	216.16
ENSRNOT00000002395	Rnf168	ENSRNOT00000002395.1	ENSRNOT00000002395.5	-0.17	0.04	0.21	2.45	-4.38	-1.93	1.28E-06	319.39	1217.78	0.81	80.10
ENSRNOT00000015452	Mtmr9	ENSRNOT00000015452.0	ENSRNOT00000015452.4	-0.21	0.19	0.40	2.51	-3.09	-0.58	4.33E-13	3302.93	4636.77	2022-12-12	105.96
ENSRNOT00000032918	Irs2	ENSRNOT00000032918.1	ENSRNOT00000032918.2	-0.26	0.17	0.42	2.29	-2.75	-0.45	7.02E-04	1226.97	1670.40	2022-07-07	37.17
ENSRNOT00000023861	Kif5b	ENSRNOT00000023861.1	ENSRNOT00000023861.6	-0.17	0.10	0.27	1.83	-3.28	-1.45	9.88E-33	252.93	692.22	286.36	2574.95
ENSRNOT00000000671	EIF4Ebp2	ENSRNOT00000000671.0	ENSRNOT00000000671.4	-0.25	0.03	0.28	3.66	-5.24	-1.58	2.24E-22	887.37	1813.33	2022-04-04	169.70
ENSRNOT00000000698	Spock2	ENSRNOT00000000698.0	ENSRNOT00000000698.6	-0.39	0.06	0.45	3.50	-3.78	-0.27	4.60E-17	3753.94	4526.26	5.96	92.83
ENSRNOT00000000698	Spock2	ENSRNOT00000000698.0	ENSRNOT00000000698.7	-0.37	0.09	0.46	2.67	-2.92	-0.25	9.68E-09	3753.94	4512.63	5.96	55.35
ENSRNOT00000022073	Tcea2	ENSRNOT00000022073.0	ENSRNOT00000022073.2	-0.22	0.25	0.47	1.78	-1.92	-0.15	1.34E-11	803.64	889.49	72.53	210.51
ENSRNOT00000025904	Stom	ENSRNOT00000025904.1	ENSRNOT00000025904.2	-0.16	0.13	0.29	1.29	-2.58	-1.29	4.92E-03	357.98	904.34	2022-10-10	66.57
ENSRNOT00000015971	Hnrnpr	ENSRNOT00000015971.1	ENSRNOT00000015971.3	-0.22	0.58	0.81	1.52	0.56	2022-07-02	4.94E-03	8549.70	2050.81	47.37	25.25
ENSRNOT00000071425	Rab10	ENSRNOT00000071425.1	ENSRNOT00000071425.3	-0.24	0.14	0.38	2.15	-2.87	-0.72	1.15E-07	1729.90	2940.71	2022-10-10	81.72
ENSRNOT00000018416	Elavl3	ENSRNOT00000018416.0	ENSRNOT00000018416.4	-0.28	0.26	0.54	2.53	-2.29	0.24	5.83E-10	1714.85	1447.07	7.88	51.41
ENSRNOT00000018416	Elavl3	ENSRNOT00000018416.0	ENSRNOT00000018416.6	-0.20	0.09	0.28	1.80	-3.16	-1.36	4.60E-04	1714.85	4376.26	7.88	69.60
ENSRNOT00000045087	Atp2c1	ENSRNOT00000045087.1	ENSRNOT00000045087.4	-0.41	0.24	0.64	2.54	-1.68	0.86	9.13E-69	20008.79	11101.62	118.69	366.26
ENSRNOT00000072851	Vps26b	ENSRNOT00000072851.2	ENSRNOT00000072851.3	-0.20	0.36	0.56	1.59	-1.24	0.35	3.43E-03	8260.30	6463.64	37.17	57.47
ENSRNOT00000032739	Ccdc92	ENSRNOT00000032739.1	ENSRNOT00000032739.3	-0.19	0.08	0.27	1.95	-3.37	-1.42	3.72E-10	5337.47	14281.92	17.17	182.42
ENSRNOT00000008140	Mettl2b	ENSRNOT00000008140.0	ENSRNOT00000008140.2	-0.31	0.00	0.31	3.60	-4.77	-1.17	4.97E-19	497.98	1119.80	0.00	126.26
ENSRNOT00000024285	Brix1	ENSRNOT00000024285.1	ENSRNOT00000024285.4	-0.21	0.18	0.39	1.69	-2.33	-0.63	3.19E-03	956.57	1468.69	2022-07-07	37.37
ENSRNOT00000042418	Tmcc1	ENSRNOT00000042418.3	ENSRNOT00000042418.4	-0.30	0.00	0.30	2.86	-4.09	-1.23	8.09E-05	474.95	1124.75	0.00	32.22
ENSRNOT00000050350	Wars	ENSRNOT00000050350.1	ENSRNOT00000050350.3	-0.23	0.03	0.26	2.79	-4.28	-1.48	4.39E-17	1203.03	3365.66	6.97	198.79
ENSRNOT00000016740	Smarca2	ENSRNOT00000016740.2	ENSRNOT00000016740.3	-0.20	0.12	0.32	1.50	-2.59	-1.10	1.11E-08	1346.36	2881.41	33.23	197.98
ENSRNOT00000025355	Rgs17	ENSRNOT00000025355.1	ENSRNOT00000025355.7	-0.38	0.32	0.70	3.23	-1.93	1.30	5.26E-17	6148.89	2173.54	18.18	54.44
ENSRNOT00000027574	Sh3pxd2a	ENSRNOT00000027574.2	ENSRNOT00000027574.6	-0.76	0.05	0.81	2022-01-06	-3.94	2022-07-02	8.19E-195	4123.54	985.25	20.00	342.32
ENSRNOT00000028632	Lgi4	ENSRNOT00000028632.0	ENSRNOT00000028632.3	-0.37	0.30	0.67	2.35	-1.34	2022-01-01	8.12E-10	105.56	50.40	214.65	332.63
ENSRNOT00000044778	Stxbp5	ENSRNOT00000044778.2	ENSRNOT00000044778.5	-0.23	0.23	0.46	2022-01-02	-2.26	-0.25	6.26E-27	1818.18	2159.39	15.86	172.32
ENSRNOT00000041493	Kif1c	ENSRNOT00000041493.0	ENSRNOT00000041493.2	-0.27	0.41	0.68	1.77	-0.69	2022-08-01	1.97E-25	372.93	174.34	262.73	428.59
ENSRNOT00000067735	Exoc5	ENSRNOT00000067735.0	ENSRNOT00000067735.2	-0.16	0.20	0.36	2.58	-3.40	-0.82	1.03E-17	2204.65	3913.94	15.15	173.33
ENSRNOT00000026227	Ablim3	ENSRNOT00000026227.0	ENSRNOT00000026227.2	-0.80	0.04	0.84	6.42	-4.13	2.30	7.95E-43	173.43	33.74	3.74	94.24
ENSRNOT00000014527	Pik3ca	ENSRNOT00000014527.1	ENSRNOT00000014527.4	-0.16	0.14	0.31	2022-02-03	-4.18	-1.16	1.76E-18	1500.81	3368.79	4.95	161.01
ENSRNOT00000019225	Kif2a	ENSRNOT00000019225.0	ENSRNOT00000019225.3	-0.32	0.34	0.66	2.15	-1.17	0.99	4.27E-08	13011.62	6601.31	63.64	83.64
ENSRNOT00000071442	Snx27	ENSRNOT00000071442.1	ENSRNOT00000071442.5	-0.17	0.03	0.19	2.94	-5.09	-2.15	9.51E-12	631.62	2380.51	2022-01-01	134.14
ENSRNOT00000067883	Vps26a	ENSRNOT00000067883.0	ENSRNOT00000067883.6	-0.27	0.05	0.32	2.17	-3.24	-1.07	3.51E-04	1290.20	2712.42	2022-04-04	45.45
ENSRNOT00000006646	Scn3a	ENSRNOT00000006646.0	ENSRNOT00000006646.4	-0.33	0.28	0.61	2.64	-1.99	0.65	1.46E-12	3397.37	2167.78	2022-06-16	62.63
ENSRNOT00000060149	Mcart1	ENSRNOT00000060149.1	ENSRNOT00000060149.4	-0.37	0.15	0.52	2.85	-2.74	0.11	8.62E-06	733.43	676.57	10.00	42.42
ENSRNOT00000010601	Ckap4	ENSRNOT00000010601.1	ENSRNOT00000010601.2	-0.26	0.05	0.31	2022-02-04	-5.19	-1.17	8.95E-27	806.67	1808.59	2022-03-03	207.68
ENSRNOT00000050059	Eif4h	ENSRNOT00000050059.2	ENSRNOT00000050059.3	-0.20	0.07	0.27	1.83	-3.28	-1.46	9.19E-04	1339.90	3653.13	2022-01-11	84.55
ENSRNOT00000068345	Naa50	ENSRNOT00000068345.1	ENSRNOT00000068345.5	-0.40	0.17	0.57	2.70	-2.31	0.39	2.21E-07	755.35	560.20	8.99	40.30
ENSRNOT00000019486	Bzw1	ENSRNOT00000019486.0	ENSRNOT00000019486.5	-0.19	0.06	0.25	2.19	-3.76	-1.56	9.73E-26	7661-01-01	22664.85	38.38	490.00
ENSRNOT00000016518	Clvs2	ENSRNOT00000016518.2	ENSRNOT00000016518.6	-0.25	0.27	0.52	1.88	-1.77	0.11	1.37E-03	2132.73	1977.27	2022-01-11	32.32
ENSRNOT00000021763	Snrpn	ENSRNOT00000021763.0	ENSRNOT00000021763.7	-0.21	0.65	0.86	1.69	0.92	2.61	8.50E-89	9428.79	1588.99	1087.58	611.62
ENSRNOT00000050891	Vegfb	ENSRNOT00000050891.0	ENSRNOT00000050891.3	-0.30	0.10	0.40	2.81	-3.41	-0.60	1.85E-24	733.43	1084.24	14.95	194.44
ENSRNOT00000057929	Ctbp1	ENSRNOT00000057929.0	ENSRNOT00000057929.4	-0.19	0.23	0.42	1.35	-1.81	-0.47	4.43E-10	6053.33	8295.96	79.80	244.24
ENSRNOT00000018413	Appl1	ENSRNOT00000018413.1	ENSRNOT00000018413.3	-0.17	0.30	0.48	1.60	-1.74	-0.14	2.06E-03	3065.66	3391.82	25.15	59.90
ENSRNOT00000026696	Hspa9	ENSRNOT00000026696.2	ENSRNOT00000026696.4	-0.17	0.61	0.78	1.18	0.63	1.81	1.70E-23	23514.85	6691.31	482.22	302.42
ENSRNOT00000027755	Stard4	ENSRNOT00000027755.1	ENSRNOT00000027755.7	-0.19	0.18	0.37	1.47	-2.25	-0.78	2.33E-11	3398.28	5836.67	24.24	154.55
ENSRNOT00000046718	Thoc1	ENSRNOT00000046718.0	ENSRNOT00000046718.3	-0.84	0.00	0.84	9.82	-5.31	4.51	5.66E-81	681.21	202.63	1.21	154.55
ENSRNOT00000075083	Atp5f1	ENSRNOT00000075083.0	ENSRNOT00000075083.5	-0.75	0.21	0.95	6.51	-2.17	4.35	0.00E+00	40765.05	2005.35	752.73	4109.39
ENSRNOT00000047000	Trappc3l	ENSRNOT00000047000.5	ENSRNOT00000047000.10	-0.19	0.00	0.19	4.54	-6.63	-2.08	7.77E-22	130.20	558.79	0.00	298.59
ENSRNOT00000010218	Ptgs1	ENSRNOT00000010218.2	ENSRNOT00000010218.6	-0.34	0.12	0.46	4.70	-4.93	-0.23	9.05E-66	338.69	398.18	2022-03-03	348.28
ENSRNOT00000009308	Mrpl19	ENSRNOT00000009308.0	ENSRNOT00000009308.6	-0.26	0.00	0.26	8.97	-10.47	-1.50	0.00E+00	314.55	896.77	2022-11-21	13591.21
ENSRNOT00000010720	Cand1	ENSRNOT00000010720.0	ENSRNOT00000010720.8	-0.33	0.41	0.75	2.97	-1.42	1.55	7.40E-21	14354.24	4899.90	60.61	97.98
ENSRNOT00000049424	Zbtb33	ENSRNOT00000049424.2	ENSRNOT00000049424.3	-0.27	0.52	0.79	1.81	0.14	1.95	1.62E-11	4678.28	1213.43	242.73	140.30
ENSRNOT00000005194	Nit1	ENSRNOT00000005194.0	ENSRNOT00000005194.3	-0.55	0.38	0.93	4.79	-1.12	3.68	2.37E-72	3517.37	272.12	56.46	106.57
ENSRNOT00000011797	Fam91a1	ENSRNOT00000011797.1	ENSRNOT00000011797.5	-0.18	0.30	0.48	2022-09-01	-1.19	-0.10	4.36E-04	2984.55	3175.86	2022-04-24	60.61
ENSRNOT00000074573	Kcnq3	ENSRNOT00000074573.2	ENSRNOT00000074573.5	-0.21	0.06	0.27	1.91	-3.42	-1.51	1.22E-05	2221.31	5320-10-01	2022-04-04	62.63
ENSRNOT00000034940	Zbtb11	ENSRNOT00000034940.0	ENSRNOT00000034940.3	-0.34	0.49	0.83	2.39	-0.01	2.38	1.91E-04	12161.92	2600.91	59.49	32.12
ENSRNOT00000060097	Crlf1	ENSRNOT00000060097.0	ENSRNOT00000060097.5	-0.25	0.40	0.66	2.77	-1.82	0.95	2.77E-22	235.05	127.37	67.58	198.59
ENSRNOT00000009587	Tmx1	ENSRNOT00000009587.1	ENSRNOT00000009587.6	-0.16	0.21	0.36	1.59	-2.40	-0.81	1.29E-03	1128.18	1994.14	2022-08-08	47.17
ENSRNOT00000010022	Pcnx	ENSRNOT00000010022.0	ENSRNOT00000010022.4	-0.25	0.07	0.32	3.36	-4.42	-1.06	1.65E-30	1048.79	2178.69	2.93	216.87
ENSRNOT00000027552	Prkar2a	ENSRNOT00000027552.3	ENSRNOT00000027552.4	-0.32	0.21	0.53	2022-09-02	-1.94	0.15	7.58E-08	3820.61	3401-11-01	14.14	56.36
ENSRNOT00000024543	Nkiras2	ENSRNOT00000024543.0	ENSRNOT00000024543.4	-0.42	0.03	0.45	6.00	-6.32	-0.32	0.00E+00	4547.27	5825.45	147.47	8026.46
ENSRNOT00000028084	Vat1	ENSRNOT00000028084.0	ENSRNOT00000028084.4	-0.46	0.51	0.96	4.79	0.03	4.82	1.25E-260	22444.65	839.80	308.79	324.24
ENSRNOT00000071572	LOC257642	ENSRNOT00000071572.3	ENSRNOT00000071572.5	-0.41	0.59	1.00	8.34	0.53	8.87	5.96E-261	23963.23	45.35	212.63	159.60
ENSRNOT00000015011	Tmem254	ENSRNOT00000015011.0	ENSRNOT00000015011.2	-0.87	0.11	0.98	8.65	-3.10	5.55	0.00E+00	2658.28	54.55	107.88	1160.61
ENSRNOT00000021920	LOC100911417	ENSRNOT00000021920.0	ENSRNOT00000021920.4	-0.74	0.21	0.95	6.49	-2.17	4.33	0.00E+00	40176.06	2005.35	753.74	4109.39
ENSRNOT00000030750	Nup160	ENSRNOT00000030750.2	ENSRNOT00000030750.7	-0.77	0.00	0.78	9.16	-7.33	1.83	0.00E+00	1117.37	319.80	2022-07-07	1011.72
ENSRNOT00000009752	LOC500034	ENSRNOT00000009752.0	ENSRNOT00000009752.9	-0.75	0.00	0.76	2022-07-09	-7.43	1.64	0.00E+00	1020.10	331.52	6.97	1060.61
ENSRNOT00000014217	Cand2	ENSRNOT00000014217.1	ENSRNOT00000014217.5	-0.53	0.00	0.54	7.32	-7.09	0.23	1.21E-76	250.00	241.92	2022-01-01	384.44
ENSRNOT00000018782	Zc3hav1	ENSRNOT00000018782.0	ENSRNOT00000018782.4	-0.27	0.01	0.29	3.40	-4.70	-1.31	8.25E-22	710.71	1758.79	2022-05-05	204.95
ENSRNOT00000007843	RGD1311744	ENSRNOT00000007843.2	ENSRNOT00000007843.6	-0.19	0.59	0.78	2022-08-01	0.74	1.82	5.54E-09	16038.18	4577.17	156.36	100.00
ENSRNOT00000023825	AABR06055554.1	ENSRNOT00000023825.2	ENSRNOT00000023825.5	-0.39	0.27	0.66	2022-12-03	-2.17	0.95	6.44E-194	4574.85	2369.29	66.46	633.64
ENSRNOT00000016740	Smarca2	ENSRNOT00000016740.2	ENSRNOT00000016740.4	-0.16	0.05	0.21	2022-10-02	-3.97	-1.87	1.34E-21	1346.36	4941.52	33.23	522.02
ENSRNOT00000023247	Fam160b1	ENSRNOT00000023247.0	ENSRNOT00000023247.3	-0.17	0.14	0.32	1.47	-2.59	-1.12	5.91E-03	1275.35	2738.38	2022-05-05	39.29
ENSRNOT00000027574	Sh3pxd2a	ENSRNOT00000027574.2	ENSRNOT00000027574.8	-0.46	0.01	0.47	6.81	-7.00	-0.18	0.00E+00	4123.54	4693.13	20.00	1707.37
ENSRNOT00000028720	Plcb3	ENSRNOT00000028720.2	ENSRNOT00000028720.6	-0.17	0.25	0.42	1.70	-2.17	-0.47	2.06E-15	3413.94	4713.23	27.47	161.92
ENSRNOT00000050617	Cacul1	ENSRNOT00000050617.1	ENSRNOT00000050617.6	-0.27	0.01	0.28	3.64	-5.00	-1.36	3.07E-41	2830.51	7227.98	2022-11-11	404.55
ENSRNOT00000068457	Tmem181	ENSRNOT00000068457.0	ENSRNOT00000068457.6	-0.25	0.28	0.53	1.68	-1.49	0.18	1.44E-05	5102.53	4507.58	24.14	60.51
ENSRNOT00000018149	G3bp1	ENSRNOT00000018149.1	ENSRNOT00000018149.2	-0.24	0.50	0.73	1.54	-0.06	1.48	4.61E-22	9608.89	3327.17	140.40	158.18
ENSRNOT00000018986	Rab11fip4	ENSRNOT00000018986.0	ENSRNOT00000018986.4	-0.26	0.03	0.28	2.64	-3.98	-1.34	9.88E-06	964.04	2430.81	2022-02-02	55.35
ENSRNOT00000027083	Rhot2	ENSRNOT00000027083.0	ENSRNOT00000027083.2	-0.20	0.43	0.62	1.22	-0.49	0.73	4.04E-25	3558.99	2137.98	112.12	226.26
ENSRNOT00000041493	Kif1c	ENSRNOT00000041493.0	ENSRNOT00000041493.4	-0.43	0.29	0.72	2.83	-1.49	1.34	7.72E-60	372.93	145.25	262.73	685.96
ENSRNOT00000060078	Luc7l	ENSRNOT00000060078.0	ENSRNOT00000060078.2	-0.30	0.08	0.38	3.23	-3.93	-0.70	1.30E-16	1286.57	2118.69	2022-09-09	133.33
ENSRNOT00000034757	LOC690251	ENSRNOT00000034757.2	ENSRNOT00000034757.5	-0.45	0.01	0.46	5.63	-5.88	-0.25	4.12E-94	1623.64	1929-09-01	2022-07-07	437.47
ENSRNOT00000001415	Elavl1	ENSRNOT00000001415.1	ENSRNOT00000001415.7	-0.23	0.05	0.28	3.45	-4.81	-1.36	1.35E-16	310.61	794.44	2022-02-02	147.27
ENSRNOT00000042117	Pdgfa	ENSRNOT00000042117.0	ENSRNOT00000042117.4	-0.76	0.18	0.94	6.15	-2.26	3.89	2.17E-42	5593.33	374.24	21.21	50.61
ENSRNOT00000004520	Actr3	ENSRNOT00000004520.1	ENSRNOT00000004520.4	-0.17	0.08	0.25	1.97	-3.54	-1.57	4.89E-44	13406.97	39862.73	90.40	991.82
ENSRNOT00000007002	Slc1a4	ENSRNOT00000007002.1	ENSRNOT00000007002.4	-0.16	0.05	0.21	1.98	-3.90	-1.92	1.34E-03	1273.13	4813.43	2022-02-02	52.32
ENSRNOT00000065965	Mapk10	ENSRNOT00000065965.0	ENSRNOT00000065965.3	-0.23	0.07	0.30	2.64	-3.83	-1.19	1.75E-37	5756-06-01	13178.79	34.24	472.22
ENSRNOT00000013329	Gpr180	ENSRNOT00000013329.0	ENSRNOT00000013329.6	-0.20	0.24	0.44	2.31	-2.68	-0.37	3.89E-22	2445.45	3168.48	2022-04-14	153.43
ENSRNOT00000067735	Exoc5	ENSRNOT00000067735.0	ENSRNOT00000067735.6	-0.26	0.20	0.46	1.59	-1.82	-0.23	8.71E-03	2204.65	2600.91	15.15	41.41
ENSRNOT00000018310	Txndc5	ENSRNOT00000018310.2	ENSRNOT00000018310.3	-0.25	0.23	0.48	1.65	-1.75	-0.09	2.04E-03	3171.31	3368.48	2022-11-11	35.35
ENSRNOT00000023988	Rspry1	ENSRNOT00000023988.1	ENSRNOT00000023988.5	-0.42	0.00	0.42	6.46	-6.95	-0.49	5.39E-80	524.85	678.08	2022-01-01	402.53
ENSRNOT00000041529	Csde1	ENSRNOT00000041529.1	ENSRNOT00000041529.3	-0.19	0.14	0.33	1.59	-2.65	-1.05	4.75E-49	7821.62	16262.93	280.71	1452.63
ENSRNOT00000045837	Ankrd50	ENSRNOT00000045837.0	ENSRNOT00000045837.4	-0.15	0.06	0.21	2.43	-4.34	-1.92	2.32E-09	1278.38	4769.39	2022-06-06	153.54
ENSRNOT00000045837	Ankrd50	ENSRNOT00000045837.0	ENSRNOT00000045837.5	-0.26	0.09	0.35	2022-09-02	-2.96	-0.87	3.61E-05	1278.38	2308.38	2022-06-06	52.53
ENSRNOT00000066199	Fubp1	ENSRNOT00000066199.0	ENSRNOT00000066199.4	-0.34	0.35	0.69	2.75	-1.61	1.14	1.37E-35	5952.83	2747.98	34.34	133.13
ENSRNOT00000070919	Golph3l	ENSRNOT00000070919.1	ENSRNOT00000070919.4	-0.16	0.19	0.35	2.83	-3.74	-0.91	7.90E-13	1637.07	3074.14	2022-11-11	130.00
ENSRNOT00000000612	Srpk1	ENSRNOT00000000612.2	ENSRNOT00000000612.4	-0.26	0.02	0.29	3.33	-4.63	-1.30	5.96E-13	816.67	2015.35	2.93	116.87
ENSRNOT00000007558	Csnk2a1	ENSRNOT00000007558.2	ENSRNOT00000007558.5	-0.34	0.44	0.79	2.32	-0.43	1.89	1.56E-27	19901.72	5380.61	94.85	120.81
ENSRNOT00000055875	Anapc1	ENSRNOT00000055875.1	ENSRNOT00000055875.4	-0.24	0.01	0.25	2.87	-4.42	-1.54	7.78E-07	115.15	336.67	2022-01-01	68.59
ENSRNOT00000056405	Chp1	ENSRNOT00000056405.0	ENSRNOT00000056405.3	-0.37	0.63	1.00	7.51	1.16	8.67	2.02E-175	50012.22	120.00	274.55	111.72
ENSRNOT00000064083	Sec16a	ENSRNOT00000064083.2	ENSRNOT00000064083.5	-0.18	0.04	0.21	2.93	-4.81	-1.87	2.31E-09	1060.10	3927-07-01	2022-02-02	117.07
ENSRNOT00000018782	Zc3hav1	ENSRNOT00000018782.0	ENSRNOT00000018782.6	-0.27	0.02	0.28	3.70	-5.06	-1.35	3.69E-20	710.71	1820.91	2022-05-05	196.87
ENSRNOT00000067631	Eif4g3	ENSRNOT00000067631.1	ENSRNOT00000067631.4	-0.19	0.33	0.52	1.36	-1.23	0.13	1.06E-07	5375.45	4946.57	37.27	95.15
ENSRNOT00000010022	Pcnx	ENSRNOT00000010022.0	ENSRNOT00000010022.5	-0.20	0.05	0.25	3.48	-5.08	-1.61	5.86E-38	1048.79	3181.31	2.93	369.49
ENSRNOT00000049770	Ahr	ENSRNOT00000049770.3	ENSRNOT00000049770.6	-0.24	0.32	0.55	1.92	-1.61	0.31	7.25E-08	2662.32	2178.38	19.19	60.51
ENSRNOT00000051908	Nrcam	ENSRNOT00000051908.1	ENSRNOT00000051908.2	-0.23	0.13	0.35	3.69	-4.56	-0.87	5.44E-33	1769.49	3246.26	5.96	229.09
ENSRNOT00000051908	Nrcam	ENSRNOT00000051908.1	ENSRNOT00000051908.3	-0.19	0.16	0.36	3.46	-4.31	-0.85	4.49E-32	1769.49	3183.64	5.96	219.39
ENSRNOT00000064957	Papola	ENSRNOT00000064957.1	ENSRNOT00000064957.7	-0.27	0.01	0.29	3.82	-5.17	-1.35	6.02E-13	822.63	2009.49	2022-01-01	99.90
ENSRNOT00000005258	Rab21	ENSRNOT00000005258.0	ENSRNOT00000005258.3	-0.27	0.35	0.62	1.77	-1.08	0.69	8.68E-10	13577.78	8457.47	75.15	118.38
ENSRNOT00000006402	Eny2	ENSRNOT00000006402.1	ENSRNOT00000006402.4	-0.24	0.51	0.76	1.57	0.07	1.64	2.47E-31	6168.18	1980.61	245.25	245.35
ENSRNOT00000009645	Xpot	ENSRNOT00000009645.1	ENSRNOT00000009645.6	-0.26	0.22	0.48	2.68	-2.79	-0.11	1.51E-74	7282.93	7876.97	34.24	413.03
ENSRNOT00000010720	Cand1	ENSRNOT00000010720.0	ENSRNOT00000010720.7	-0.24	0.27	0.52	3.26	-3.15	0.11	1.12E-48	14354.24	13302.22	60.61	329.80
ENSRNOT00000018155	Npap60	ENSRNOT00000018155.1	ENSRNOT00000018155.3	-0.17	0.10	0.26	2.80	-4.28	-1.48	1.02E-09	1980.40	5499.70	6.87	128.28
ENSRNOT00000030056	Metap2	ENSRNOT00000030056.2	ENSRNOT00000030056.3	-0.25	0.35	0.61	1.50	-0.89	0.62	5.77E-31	10754.75	7018.79	208.38	371.52
ENSRNOT00000031571	Metap2	ENSRNOT00000031571.0	ENSRNOT00000031571.2	-0.23	0.38	0.61	1.32	-0.69	0.63	1.66E-25	10890.91	7018.79	237.58	371.52
ENSRNOT00000021819	Scn2b	ENSRNOT00000021819.3	ENSRNOT00000021819.5	-0.24	0.35	0.59	1.42	-0.90	0.52	1.89E-23	7864.14	5451.31	384.24	534.65
ENSRNOT00000024828	Pafah1b2	ENSRNOT00000024828.0	ENSRNOT00000024828.3	-0.16	0.38	0.54	2022-05-01	-0.79	0.26	1.61E-12	12384.44	10378.48	96.46	195.45
ENSRNOT00000027552	Prkar2a	ENSRNOT00000027552.3	ENSRNOT00000027552.5	-0.15	0.10	0.25	1.77	-3.38	-1.61	3.75E-08	3820.61	11464.14	14.14	163.23
ENSRNOT00000074772	Usp19	ENSRNOT00000074772.0	ENSRNOT00000074772.2	-0.33	0.37	0.71	2022-11-03	-1.84	1.27	2.09E-22	3233.94	1335.76	2022-12-12	64.65
ENSRNOT00000030912	Tfap2b	ENSRNOT00000030912.1	ENSRNOT00000030912.3	-0.34	0.06	0.40	3.30	-3.91	-0.61	4.33E-19	2858.99	4359.49	4.85	118.18
ENSRNOT00000036194	Raph1	ENSRNOT00000036194.2	ENSRNOT00000036194.7	-0.36	0.12	0.48	2.80	-2.91	-0.11	9.42E-15	1709.80	1832.93	2022-11-11	91.11
ENSRNOT00000074527	LOC100911356	ENSRNOT00000074527.1	ENSRNOT00000074527.6	-0.16	0.21	0.37	1.86	-2.66	-0.80	6.80E-09	303.23	516.16	2022-03-03	63.54
ENSRNOT00000061950	Hspa1a	ENSRNOT00000061950.2	ENSRNOT00000061950.6	-0.57	0.13	0.70	4.49	-3.28	1.22	6.90E-51	2927.47	1256.57	17.17	140.00
ENSRNOT00000065393	Ctbp1	ENSRNOT00000065393.1	ENSRNOT00000065393.4	-0.20	0.26	0.46	1.29	-1.52	-0.23	4.62E-11	7124.65	8266.67	94.85	244.24
ENSRNOT00000009923	Strap	ENSRNOT00000009923.1	ENSRNOT00000009923.10	-0.71	0.27	0.98	7.42	-1.63	5.79	5.67E-185	3695.35	66.36	49.39	161.52
ENSRNOT00000074273	AABR06055555.1	ENSRNOT00000074273.2	ENSRNOT00000074273.5	-0.34	0.37	0.72	2.60	-1.25	1.35	9.49E-200	7487.37	2933.54	120.61	619.70
ENSRNOT00000073005	Srsf1	ENSRNOT00000073005.1	ENSRNOT00000073005.3	-0.20	0.01	0.22	4.30	-6.14	-1.84	2.68E-25	1006.67	3602.63	2.83	292.73
ENSRNOT00000006157	Meis1	ENSRNOT00000006157.2	ENSRNOT00000006157.4	-0.30	0.32	0.61	2.25	-1.58	0.67	1.75E-12	8081-11-01	5078.59	45.25	98.99
ENSRNOT00000067556	Ythdf3	ENSRNOT00000067556.1	ENSRNOT00000067556.5	-0.18	0.16	0.34	2.64	-3.61	-0.97	1.19E-07	2252.42	4415.15	2022-11-11	96.36
ENSRNOT00000036365	Sec63	ENSRNOT00000036365.1	ENSRNOT00000036365.2	-0.21	0.16	0.37	1.98	-2.77	-0.78	1.48E-05	1527.88	2631.41	2022-07-07	56.57
ENSRNOT00000015927	RGD1309903	ENSRNOT00000015927.2	ENSRNOT00000015927.6	-0.29	0.01	0.30	3.89	-5.33	-1.44	3.68E-37	519.19	1177.37	2022-04-04	304.75
ENSRNOT00000011552	Tbx3	ENSRNOT00000011552.2	ENSRNOT00000011552.7	-0.31	0.21	0.53	2022-10-02	-1.95	0.15	2.25E-07	3119.70	2788.59	23.94	70.51
ENSRNOT00000032739	Ccdc92	ENSRNOT00000032739.1	ENSRNOT00000032739.2	-0.19	0.18	0.37	1.30	-2.05	-0.75	4.32E-04	5337.47	8968.89	17.17	73.64
ENSRNOT00000027755	Stard4	ENSRNOT00000027755.1	ENSRNOT00000027755.5	-0.19	0.18	0.36	1.46	-2.28	-0.83	4.55E-11	3398.28	6029.70	24.24	156.57
ENSRNOT00000005770	Pkn1	ENSRNOT00000005770.0	ENSRNOT00000005770.6	-0.22	0.13	0.35	1.53	-2.43	-0.90	3.17E-04	554.14	1032.53	22.22	98.99
ENSRNOT00000026297	Nudt21	ENSRNOT00000026297.0	ENSRNOT00000026297.7	-0.26	0.16	0.42	1.84	-2.32	-0.49	1.20E-09	3189.49	4457.27	21.21	111.41
ENSRNOT00000074649	Ube2h	ENSRNOT00000074649.1	ENSRNOT00000074649.3	-0.19	0.01	0.20	2.26	-4.18	-1.92	1.33E-04	39.60	151.01	0.91	65.45
Table S17 : Promoter-distal shifts in NT-3 treated axons as compared to cell bodies. Columns represent: 1- Ensembl Rn5 transcript ID, 2- Rat Rn5 gene symbol, 3- promoter-proximal (Ip) 3’ UTR isoform ID, 4- promoter-distall (Id) 3’ UTR isoform ID, 5- difference in relative promoter-proximal usage between axons and cell bodies in NT-3, 6- relative promoter-proximal usage in NT-3 axons, 7- relative …
