# Supplementary material for: The predicted RNA-binding protein regulome of axonal mRNAs
Source: HighWire-hosted journal article supplement (doi:10.1101/gr.277804.123), 2023-08-15
Supplement: Supplemental_Tables.zip [file Supplemental Table S18.xlsx]

## Sheet: Sheet1
txID	geneSymbol	imIDp	uniqueID	dPUD(Ip/(Ip+Id))	mPUD.axon	mPUD.cb	dRUD(Id/Ip)	mRUD.axon	mRUD.cb	FDR	proxi.cb	dist.cb	proxi.ax	dist.ax
ENSRNOT00000028703	Cebpg	ENSRNOT00000028703.1	ENSRNOT00000028703.0	0.54	0.63	0.09	-4.51	2022-12-01	-3.38	2.65E-207	802.02	8378.48	433.64	349.29
ENSRNOT00000026595	Btbd1	ENSRNOT00000026595.1	ENSRNOT00000026595.0	0.45	0.65	0.20	-3.65	1.64	-2.01	1.45E-163	3346.36	13491.41	498.69	235.96
ENSRNOT00000065288	Nrip3	ENSRNOT00000065288.1	ENSRNOT00000065288.0	0.41	0.47	0.06	-3.71	-0.31	-4.02	1.48E-72	460.10	7547.17	203.94	491.11
ENSRNOT00000027957	G6PC	ENSRNOT00000027957.1	ENSRNOT00000027957.0	0.35	0.50	0.15	-2.53	0.02	-2.51	1.54E-82	2066.57	11823.74	290.40	286.06
ENSRNOT00000004373	C1qtnf1	ENSRNOT00000004373.1	ENSRNOT00000004373.0	0.75	0.87	0.12	-5.36	2.52	-2.84	2.91E-41	345.15	2430-10-01	59.60	2022-10-10
ENSRNOT00000009943	Mtmr4	ENSRNOT00000009943.1	ENSRNOT00000009943.0	0.40	0.52	0.13	-3.27	0.47	-2.80	1.20E-29	1251.92	8688.28	132.83	226.97
ENSRNOT00000002222	Wrb	ENSRNOT00000002222.1	ENSRNOT00000002222.0	0.58	0.72	0.13	-3.98	1.29	-2.69	1.62E-102	680.40	4424-04-01	224.95	107.98
ENSRNOT00000002545	Hic2	ENSRNOT00000002545.1	ENSRNOT00000002545.0	0.70	0.78	0.08	-5.47	1.95	-3.52	3.45E-24	152.53	1682.22	31.31	2022-09-09
ENSRNOT00000004083	Tiprl	ENSRNOT00000004083.1	ENSRNOT00000004083.0	0.47	0.66	0.18	-3.70	1.55	-2.15	8.65E-87	1666.46	7411.62	168.59	32.32
ENSRNOT00000003087	Slain2	ENSRNOT00000003087.1	ENSRNOT00000003087.0	0.47	0.60	0.13	-3.46	0.73	-2.73	6.04E-105	573.13	3823.84	204.75	74.75
ENSRNOT00000060193	Mrpl52	ENSRNOT00000060193.1	ENSRNOT00000060193.0	0.32	0.45	0.13	-2.46	-0.28	-2.74	2.16E-56	292.83	1954.44	270.91	345.96
ENSRNOT00000024781	Isca1	ENSRNOT00000024781.1	ENSRNOT00000024781.0	0.68	0.85	0.18	-4.83	2.62	-2.21	0.00E+00	1835.15	8515.66	792.73	134.24
ENSRNOT00000039377	Riok3	ENSRNOT00000039377.1	ENSRNOT00000039377.0	0.38	0.48	0.09	-3.15	-0.14	-3.29	1.23E-102	1787.58	17406.57	251.92	301.41
ENSRNOT00000026989	Paip2	ENSRNOT00000026989.1	ENSRNOT00000026989.0	0.33	0.46	0.13	-2.45	-0.24	-2.69	2.72E-216	3845.66	24543.94	1057.58	1600.91
ENSRNOT00000021061	Rnf138	ENSRNOT00000021061.2	ENSRNOT00000021061.0	0.53	0.70	0.18	-3.70	1.48	-2.22	1.44E-40	535.56	2487-07-01	184.65	173.74
ENSRNOT00000028389	Snx27	ENSRNOT00000028389.1	ENSRNOT00000028389.0	0.50	0.53	0.03	-5.33	0.27	-5.06	3.74E-67	140.10	4745-05-01	108.69	229.09
ENSRNOT00000000467	Nus1	ENSRNOT00000000467.1	ENSRNOT00000000467.0	0.44	0.49	0.05	-4.14	-0.07	-4.22	1.62E-102	569.60	10480.91	159.60	175.35
ENSRNOT00000016220	Mapre1	ENSRNOT00000016220.1	ENSRNOT00000016220.0	0.29	0.39	0.10	-2.47	-0.64	-3.11	4.80E-160	6693.43	58222.73	501.92	752.02
ENSRNOT00000065926	Lyrm2	ENSRNOT00000065926.1	ENSRNOT00000065926.0	0.77	0.90	0.13	-6.69	3.96	-2.74	6.28E-220	184.04	1245.66	459.09	56.57
ENSRNOT00000011508	Atp6v1g1	ENSRNOT00000011508.1	ENSRNOT00000011508.0	0.16	0.28	0.12	-1.55	-1.37	-2.93	1.18E-241	14433.43	#######	1718.99	4483.64
ENSRNOT00000041937	Kif1b	ENSRNOT00000041937.1	ENSRNOT00000041937.0	0.46	0.55	0.09	-3.60	0.27	-3.33	3.79E-18	50.81	518.48	40.91	35.96
ENSRNOT00000055271	Ppp1r1a	ENSRNOT00000055271.1	ENSRNOT00000055271.0	0.43	0.54	0.11	-3.20	0.25	-2.95	3.32E-13	34.44	265.45	83.74	125.76
ENSRNOT00000036556	Tusc2	ENSRNOT00000036556.1	ENSRNOT00000036556.0	0.58	0.64	0.07	-5.02	1.24	-3.78	3.42E-64	245.56	3375.96	116.97	109.90
ENSRNOT00000064114	Higd1a	ENSRNOT00000064114.1	ENSRNOT00000064114.0	0.47	0.62	0.15	-3.23	0.69	-2.53	2.29E-27	2470-10-01	14297.68	68.69	47.47
ENSRNOT00000021671	Parva	ENSRNOT00000021671.3	ENSRNOT00000021671.6	0.26	0.30	0.04	-3.47	-1.24	-4.71	0.00E+00	1752.12	45131.01	994.65	2399-09-01
ENSRNOT00000056024	Svip	ENSRNOT00000056024.2	ENSRNOT00000056024.4	0.45	0.62	0.17	-2.99	0.69	-2.29	1.19E-188	1646.46	8113.64	641.31	430.00
ENSRNOT00000061229	Ubl3	ENSRNOT00000061229.1	ENSRNOT00000061229.3	0.40	0.47	0.07	-3.44	-0.20	-3.64	1.93E-36	600.30	7509.80	88.28	145.35
ENSRNOT00000043004	Pbx1	ENSRNOT00000043004.2	ENSRNOT00000043004.6	0.70	0.81	0.11	-6.82	3.88	-2.94	1.12E-108	194.95	1509.90	166.67	22.22
ENSRNOT00000016995	Vps36	ENSRNOT00000016995.0	ENSRNOT00000016995.6	0.61	0.69	0.08	-4.65	1.14	-3.51	2.03E-52	795.05	9058-08-01	73.74	34.34
ENSRNOT00000036092	Zdhhc2	ENSRNOT00000036092.1	ENSRNOT00000036092.3	0.40	0.48	0.09	-3.27	-0.11	-3.39	2.30E-254	2194.95	22993.94	560.51	576.57
ENSRNOT00000019040	Ssr1	ENSRNOT00000019040.1	ENSRNOT00000019040.6	0.35	0.54	0.19	-2.55	0.43	-2.12	1.48E-13	823.43	3563-03-01	156.26	293.43
ENSRNOT00000023519	Nrsn1	ENSRNOT00000023519.1	ENSRNOT00000023519.4	0.25	0.44	0.19	-1.72	-0.36	-2.08	0.00E+00	8993.54	38228.08	4071.52	6144.34
ENSRNOT00000009000	Cd44	ENSRNOT00000009000.1	ENSRNOT00000009000.5	0.22	0.34	0.12	-1.89	-0.98	-2.87	2.55E-78	1799.19	13152.32	432.53	870.10
ENSRNOT00000014904	Rpl22	ENSRNOT00000014904.1	ENSRNOT00000014904.2	0.77	0.84	0.07	-6.20	2.56	-3.64	2.46E-291	506.06	6318.79	369.39	72.73
ENSRNOT00000005491	Atp2b1	ENSRNOT00000005491.0	ENSRNOT00000005491.2	0.20	0.35	0.15	-1.41	-1.06	-2.47	2.15E-26	1569.39	8712.93	211.62	429.09
ENSRNOT00000005491	Atp2b1	ENSRNOT00000005491.0	ENSRNOT00000005491.4	0.38	0.58	0.20	-3.97	1.94	-2.03	9.06E-27	1569.39	6399.39	211.62	298.48
ENSRNOT00000009152	Nhp2l1	ENSRNOT00000009152.0	ENSRNOT00000009152.2	0.28	0.38	0.10	-2.40	-0.80	-3.20	3.03E-70	2747.27	25314.44	450.40	1344.65
ENSRNOT00000009425	Ndufa7	ENSRNOT00000009425.0	ENSRNOT00000009425.2	0.50	0.64	0.15	-4.59	2022-04-02	-2.55	2.29E-57	719.29	4168.38	350.40	536.06
ENSRNOT00000041354	Atp2b1	ENSRNOT00000041354.0	ENSRNOT00000041354.4	0.38	0.58	0.20	-3.97	1.94	-2.03	9.06E-27	1569.39	6399.39	211.62	298.48
ENSRNOT00000019539	Ube2q2	ENSRNOT00000019539.2	ENSRNOT00000019539.3	0.49	0.64	0.15	-3.28	0.83	-2.46	4.73E-144	776.77	4272.93	422.73	245.45
ENSRNOT00000019539	Ube2q2	ENSRNOT00000019539.2	ENSRNOT00000019539.4	0.55	0.62	0.07	-4.57	0.77	-3.79	1.16E-278	776.77	10780.40	422.73	241.31
ENSRNOT00000021803	Rpl7l1	ENSRNOT00000021803.3	ENSRNOT00000021803.4	0.57	0.66	0.09	-4.21	0.98	-3.23	7.59E-90	60.91	586.46	263.64	115.15
ENSRNOT00000021803	Rpl7l1	ENSRNOT00000021803.3	ENSRNOT00000021803.5	0.90	0.99	0.09	-9.39	6.13	-3.26	9.60E-169	60.91	600.71	263.64	2022-01-01
ENSRNOT00000029593	Rcan2	ENSRNOT00000029593.2	ENSRNOT00000029593.3	0.70	0.85	0.15	-6.03	3.55	-2.48	1.32E-128	508.48	2807.47	198.99	14.14
ENSRNOT00000059031	Ctps2	ENSRNOT00000059031.0	ENSRNOT00000059031.4	0.73	0.80	0.07	-5.66	2.00	-3.65	2.28E-49	384.55	4827.37	58.59	16.16
ENSRNOT00000012400	Fermt2	ENSRNOT00000012400.1	ENSRNOT00000012400.2	0.51	0.71	0.20	-3.69	1.66	-2.03	1.32E-86	6131.72	25007.98	246.36	113.03
ENSRNOT00000023628	Hspa4	ENSRNOT00000023628.1	ENSRNOT00000023628.2	0.20	0.35	0.16	-1.39	-1.03	-2.42	1.43E-16	1597.98	8529.80	81.62	118.28
ENSRNOT00000020608	Rufy3	ENSRNOT00000020608.0	ENSRNOT00000020608.5	0.32	0.41	0.09	-2.74	-0.53	-3.28	0.00E+00	4877.37	47246.87	1854.75	2716.97
ENSRNOT00000019040	Ssr1	ENSRNOT00000019040.1	ENSRNOT00000019040.3	0.35	0.44	0.08	-3.05	-0.40	-3.46	8.35E-53	823.43	9007.37	156.26	277.27
ENSRNOT00000023125	LOC306766	ENSRNOT00000023125.2	ENSRNOT00000023125.5	0.16	0.36	0.20	-1.19	-0.82	-2.01	1.07E-10	337.88	1368.69	140.40	248.28
ENSRNOT00000041354	Atp2b1	ENSRNOT00000041354.0	ENSRNOT00000041354.3	0.29	0.45	0.16	-1.96	-0.45	-2.40	6.04E-33	1569.39	8298.18	211.62	347.27
ENSRNOT00000045285	Map7d2	ENSRNOT00000045285.1	ENSRNOT00000045285.4	0.17	0.26	0.09	-1.85	-1.46	-3.31	1.56E-22	1265.25	12499.09	105.86	289.49
ENSRNOT00000042768	Kif1b	ENSRNOT00000042768.1	ENSRNOT00000042768.3	0.46	0.55	0.09	-3.60	0.27	-3.33	3.79E-18	50.81	518.48	40.91	35.96
ENSRNOT00000004290	Timp2	ENSRNOT00000004290.1	ENSRNOT00000004290.3	0.24	0.35	0.11	-2.09	-0.90	-2.98	4.71E-07	649.39	5060.61	35.15	86.46
ENSRNOT00000002222	Wrb	ENSRNOT00000002222.1	ENSRNOT00000002222.4	0.66	0.82	0.16	-4.51	2022-08-02	-2.43	2.55E-110	680.40	3689.70	224.95	63.43
ENSRNOT00000039997	Pcnp	ENSRNOT00000039997.2	ENSRNOT00000039997.5	0.20	0.35	0.15	-1.48	-1.00	-2.48	9.41E-31	726.87	4071.92	260.30	510.40
ENSRNOT00000043004	Pbx1	ENSRNOT00000043004.2	ENSRNOT00000043004.3	0.85	0.95	0.10	-7.68	4.49	-3.19	1.17E-136	194.95	1783.23	166.67	4.95
ENSRNOT00000008030	Nsg1	ENSRNOT00000008030.1	ENSRNOT00000008030.4	0.22	0.31	0.09	-2.08	-1.19	-3.27	5.92E-170	4088.69	39696.46	722.93	1634.55
ENSRNOT00000014821	Gch1	ENSRNOT00000014821.0	ENSRNOT00000014821.3	0.39	0.57	0.17	-3.37	2022-12-01	-2.25	1.02E-74	1444.75	6844-04-01	198.89	96.87
ENSRNOT00000051594	Znrf2	ENSRNOT00000051594.2	ENSRNOT00000051594.3	0.19	0.39	0.20	-1.22	-0.81	-2.02	1.02E-42	2141-11-01	8809.70	221.92	225.56
ENSRNOT00000041548	Rbms3	ENSRNOT00000041548.2	ENSRNOT00000041548.3	0.35	0.39	0.04	-3.88	-0.67	-4.55	1.16E-167	185.15	4452.32	378.08	636.77
ENSRNOT00000041548	Rbms3	ENSRNOT00000041548.2	ENSRNOT00000041548.6	0.73	0.91	0.18	-5.45	3.23	-2.22	1.92E-156	185.15	864.04	378.08	38.18
ENSRNOT00000052392	Cadm1	ENSRNOT00000052392.2	ENSRNOT00000052392.4	0.66	0.86	0.20	-5.78	3.74	-2.04	0.00E+00	2597.78	10775.15	2211.62	303.64
ENSRNOT00000030765	Hand2	ENSRNOT00000030765.2	ENSRNOT00000030765.3	0.26	0.31	0.05	-3.15	-1.16	-4.31	3.65E-98	1664.34	32262.12	206.87	462.42
ENSRNOT00000068345	Naa50	ENSRNOT00000068345.1	ENSRNOT00000068345.6	0.39	0.54	0.15	-2.84	0.33	-2.50	4.80E-115	807.07	4581-01-01	334.95	215.45
ENSRNOT00000057138	Mto1	ENSRNOT00000057138.2	ENSRNOT00000057138.6	0.89	0.99	0.10	-9.61	6.37	-3.23	0.00E+00	734.24	7018.18	976.97	11.41
ENSRNOT00000043365	Pigx	ENSRNOT00000043365.0	ENSRNOT00000043365.4	0.84	0.96	0.12	-7.58	4.72	-2.87	1.35E-74	83.84	623.03	104.04	2022-02-02
ENSRNOT00000001417	Rac1	ENSRNOT00000001417.0	ENSRNOT00000001417.3	0.22	0.33	0.11	-1.89	-1.15	-3.04	2.78E-18	2109-09-01	17283.03	118.99	340.10
ENSRNOT00000017784	Kif26b	ENSRNOT00000017784.0	ENSRNOT00000017784.5	0.44	0.55	0.12	-3.24	0.30	-2.94	0.00E+00	1543.84	11873.84	1888.59	1381.82
ENSRNOT00000044847	E2f5	ENSRNOT00000044847.1	ENSRNOT00000044847.4	0.22	0.40	0.18	-1.60	-0.62	-2.21	4.84E-14	277.88	1291.62	142.12	246.77
ENSRNOT00000050137	Mmp16	ENSRNOT00000050137.0	ENSRNOT00000050137.7	0.63	0.83	0.19	-4.95	2.89	-2.06	9.77E-125	820.40	3442.83	261.31	44.34
ENSRNOT00000041325	Atcay	ENSRNOT00000041325.1	ENSRNOT00000041325.5	0.28	0.46	0.18	-1.94	-0.28	-2.22	5.93E-04	299.39	1393.84	2022-12-22	35.35
ENSRNOT00000027345	Reep5	ENSRNOT00000027345.1	ENSRNOT00000027345.2	0.65	0.85	0.20	-4.55	2.51	-2.04	5.07E-294	4425.45	18377.78	598.08	105.96
ENSRNOT00000019623	Pcmt1	ENSRNOT00000019623.0	ENSRNOT00000019623.2	0.23	0.37	0.14	-1.88	-0.77	-2.64	3.51E-39	1649.09	10307.17	192.83	311.72
ENSRNOT00000019623	Pcmt1	ENSRNOT00000019623.0	ENSRNOT00000019623.3	0.23	0.31	0.09	-1.87	-1.54	-3.41	6.39E-39	1649.09	17558.18	192.83	576.67
ENSRNOT00000065177	Irak1	ENSRNOT00000065177.1	ENSRNOT00000065177.4	0.42	0.51	0.09	-3.42	0.02	-3.40	1.67E-23	591.72	6248.48	63.43	102.02
ENSRNOT00000005293	Map2k4	ENSRNOT00000005293.2	ENSRNOT00000005293.4	0.65	0.73	0.08	-5.25	1.75	-3.49	0.00E+00	3398.28	38290.61	1342.02	746.16
ENSRNOT00000040829	Smyd3	ENSRNOT00000040829.0	ENSRNOT00000040829.2	0.45	0.52	0.07	-3.94	0.14	-3.80	1.26E-26	298.69	4202.53	84.85	218.69
ENSRNOT00000074527	LOC100911356	ENSRNOT00000074527.1	ENSRNOT00000074527.8	0.21	0.26	0.05	-2.68	-1.66	-4.34	1.60E-45	358.38	7313.84	110.81	304.85
ENSRNOT00000003087	Slain2	ENSRNOT00000003087.1	ENSRNOT00000003087.5	0.50	0.59	0.09	-4.02	0.61	-3.40	2.45E-134	573.13	6109.60	204.75	84.85
ENSRNOT00000003106	Hnrnpdl	ENSRNOT00000003106.0	ENSRNOT00000003106.5	0.28	0.48	0.19	-1.81	-0.26	-2.07	7.82E-16	1981.21	8443.84	107.07	150.40
ENSRNOT00000019454	Ing1	ENSRNOT00000019454.2	ENSRNOT00000019454.5	0.81	0.91	0.10	-6.12	2.91	-3.21	4.97E-30	384.24	3562.22	36.36	2022-05-05
ENSRNOT00000021073	Tpm4	ENSRNOT00000021073.2	ENSRNOT00000021073.6	0.20	0.34	0.14	-1.66	-0.99	-2.64	9.57E-70	1306.57	8165.25	481.11	916.46
ENSRNOT00000025510	Txnl1	ENSRNOT00000025510.0	ENSRNOT00000025510.4	0.47	0.64	0.18	-3.09	0.89	-2.21	9.91E-101	4404.55	20356.36	279.49	146.97
ENSRNOT00000006329	Napb	ENSRNOT00000006329.3	ENSRNOT00000006329.5	0.42	0.43	0.00	-7.55	-0.46	-8.01	1.95E-178	125.76	32797.07	107.37	109.09
ENSRNOT00000020478	Pdia3	ENSRNOT00000020478.1	ENSRNOT00000020478.5	0.34	0.53	0.19	-2.26	0.18	-2.08	4.08E-20	2272.73	9683.54	102.83	113.94
ENSRNOT00000029386	Samd10	ENSRNOT00000029386.0	ENSRNOT00000029386.4	0.25	0.41	0.16	-1.85	-0.53	-2.38	6.57E-47	2338.79	12190.81	234.34	308.08
ENSRNOT00000030221	AABR06055804.1	ENSRNOT00000030221.0	ENSRNOT00000030221.8	0.25	0.32	0.07	-2.46	-1.20	-3.65	3.02E-187	2115.45	26438.89	817.88	2338.89
ENSRNOT00000052392	Cadm1	ENSRNOT00000052392.2	ENSRNOT00000052392.5	0.69	0.82	0.13	-5.66	2.94	-2.72	0.00E+00	2597.78	17140.61	2211.62	435.86
ENSRNOT00000021803	Rpl7l1	ENSRNOT00000021803.3	ENSRNOT00000021803.6	0.67	0.70	0.03	-8.11	3.13	-4.98	2.13E-221	60.91	1972.22	263.64	63.64
ENSRNOT00000065075	Ap1s2	ENSRNOT00000065075.1	ENSRNOT00000065075.4	0.20	0.34	0.14	-1.40	-1.26	-2.66	6.99E-44	1331.01	8494.14	268.18	508.99
ENSRNOT00000024366	Coa5	ENSRNOT00000024366.2	ENSRNOT00000024366.6	0.40	0.49	0.09	-3.29	-0.04	-3.34	0.00E+00	1386.46	13995.86	2646.26	2797.98
ENSRNOT00000028703	Cebpg	ENSRNOT00000028703.1	ENSRNOT00000028703.3	0.61	0.70	0.09	-5.33	2022-01-02	-3.32	1.59E-241	802.02	8017.47	433.64	229.19
ENSRNOT00000003473	Sap30l	ENSRNOT00000003473.2	ENSRNOT00000003473.5	0.46	0.55	0.10	-3.63	0.38	-3.24	5.56E-65	926.16	8681.52	111.92	63.54
ENSRNOT00000014821	Gch1	ENSRNOT00000014821.0	ENSRNOT00000014821.4	0.39	0.48	0.09	-2.94	-0.40	-3.34	2.13E-66	1444.75	14657.78	198.89	334.14
ENSRNOT00000058204	Serp2	ENSRNOT00000058204.1	ENSRNOT00000058204.3	0.17	0.36	0.19	-1.24	-0.84	-2.07	9.25E-34	819.19	3457-07-01	482.63	863.03
ENSRNOT00000000467	Nus1	ENSRNOT00000000467.1	ENSRNOT00000000467.2	0.82	0.91	0.09	-6.57	3.24	-3.33	8.08E-137	569.60	5665.56	159.60	15.15
Table S18 : Candidate axonal remodeling in NGF. Columns represent: 1- Ensembl Rn5 transcript ID, 2- Rat Rn5 gene symbol, 3- promoter-proximal (Ip) 3’ UTR isoform ID, 4- promoter-distall (Id) 3’ UTR isoform ID, 5- difference in relative promoter-proximal usage between axons and cell bodies in NGF, 6- relative promoter-proximal usage in NGF axons, 7- relative promoter-proximal usage in NGF cell bod…
