# Supplementary material for: The predicted RNA-binding protein regulome of axonal mRNAs
Source: HighWire-hosted journal article supplement (doi:10.1101/gr.277804.123), 2023-08-15
Supplement: Supplemental_Tables.zip [file Supplemental Table S19.xlsx]

## Sheet: Sheet1
txID	geneSymbol	imIDp	uniqueID	dPUD(Ip/(Ip+Id))	mPUD.axon	mPUD.cb	dRUD(Id/Ip)	mRUD.axon	mRUD.cb	FDR	proxi.cb	dist.cb	proxi.ax	dist.ax
ENSRNOT00000026063	Stx1b	ENSRNOT00000026063.1	ENSRNOT00000026063.0	0.65	0.68	0.03	-6.82	1.95	-4.87	3.95E-41	73.43	2205.76	48.28	41.41
ENSRNOT00000022309	Got1	ENSRNOT00000022309.1	ENSRNOT00000022309.0	0.22	0.34	0.11	-1.98	-0.99	-2.97	2.22E-63	5754.55	45473.74	274.55	531.21
ENSRNOT00000027957	G6PC	ENSRNOT00000027957.1	ENSRNOT00000027957.0	0.60	0.72	0.12	-4.19	1.33	-2.86	9.84E-117	1648.99	11974.04	206.77	79.70
ENSRNOT00000002545	Hic2	ENSRNOT00000002545.1	ENSRNOT00000002545.0	0.84	0.88	0.04	-7.60	2.95	-4.66	3.45E-76	84.75	2225.86	68.69	10.91
ENSRNOT00000003391	Insig2	ENSRNOT00000003391.1	ENSRNOT00000003391.0	0.39	0.51	0.11	-3.01	0.05	-2.96	4.24E-28	1390.30	10815.96	73.64	79.70
ENSRNOT00000067135	Rgl1	ENSRNOT00000067135.1	ENSRNOT00000067135.0	0.84	0.94	0.10	-6.97	3.73	-3.25	4.28E-47	90.71	855.96	57.58	2022-04-04
ENSRNOT00000008030	Nsg1	ENSRNOT00000008030.1	ENSRNOT00000008030.0	0.29	0.35	0.06	-2.95	-1.02	-3.97	0.00E+00	7083.13	112859.49	1204.95	1837.37
ENSRNOT00000060193	Mrpl52	ENSRNOT00000060193.1	ENSRNOT00000060193.0	0.56	0.72	0.16	-3.94	1.55	-2.39	1.02E-60	419.29	2214.24	135.66	48.08
ENSRNOT00000024781	Isca1	ENSRNOT00000024781.1	ENSRNOT00000024781.0	0.46	0.58	0.11	-3.62	0.66	-2.96	0.00E+00	1365.66	10631.21	728.38	165.66
ENSRNOT00000025916	Hnrnpk	ENSRNOT00000025916.1	ENSRNOT00000025916.0	0.24	0.36	0.13	-1.77	-1.03	-2.80	2.33E-94	11427.88	79622.93	392.22	626.06
ENSRNOT00000044662	Lgals8	ENSRNOT00000044662.1	ENSRNOT00000044662.0	0.42	0.47	0.04	-3.65	-0.80	-4.45	2.83E-48	586.57	12775.05	128.08	435.25
ENSRNOT00000026989	Paip2	ENSRNOT00000026989.1	ENSRNOT00000026989.0	0.56	0.72	0.16	-3.81	1.42	-2.40	0.00E+00	4362.73	22912.93	1038.89	295.86
ENSRNOT00000021516	Zmat2	ENSRNOT00000021516.1	ENSRNOT00000021516.0	0.26	0.45	0.19	-1.76	-0.31	-2.07	2.34E-25	2134.85	8967.88	102.83	86.67
ENSRNOT00000027345	Reep5	ENSRNOT00000027345.1	ENSRNOT00000027345.0	0.22	0.27	0.05	-2.95	-1.45	-4.40	1.98E-247	4514.75	94943.43	559.09	1505.56
ENSRNOT00000067141	LOC100363716	ENSRNOT00000067141.2	ENSRNOT00000067141.0	0.28	0.36	0.08	-2.61	-0.83	-3.44	6.66E-88	1302.63	14184.65	244.85	395.66
ENSRNOT00000015217	Ndufs4	ENSRNOT00000015217.1	ENSRNOT00000015217.0	0.63	0.71	0.08	-5.34	1.87	-3.47	9.29E-124	2002.53	22195.15	187.58	99.60
ENSRNOT00000068745	Chn1	ENSRNOT00000068745.1	ENSRNOT00000068745.0	0.24	0.32	0.09	-2.31	-1.06	-3.37	2.75E-82	1096.26	11379.70	325.35	709.60
ENSRNOT00000015808	Mtpn	ENSRNOT00000015808.1	ENSRNOT00000015808.0	0.36	0.47	0.11	-2.69	-0.37	-3.06	1.70E-11	2493.54	20807.58	55.45	134.24
ENSRNOT00000065926	Lyrm2	ENSRNOT00000065926.1	ENSRNOT00000065926.0	0.52	0.71	0.20	-4.23	2.21	-2.02	4.97E-73	292.42	1180.30	293.33	143.43
ENSRNOT00000011508	Atp6v1g1	ENSRNOT00000011508.1	ENSRNOT00000011508.0	0.31	0.44	0.13	-2.35	-0.38	-2.74	1.03E-295	13644.95	91047.37	1190.81	1695.56
ENSRNOT00000055271	Ppp1r1a	ENSRNOT00000055271.1	ENSRNOT00000055271.0	0.76	0.96	0.19	-5.71	3.61	-2.10	1.98E-21	107.27	439.19	35.05	2022-01-01
ENSRNOT00000064114	Higd1a	ENSRNOT00000064114.1	ENSRNOT00000064114.0	0.28	0.46	0.18	-2.00	-0.23	-2.23	5.06E-22	2570.61	11905.96	117.88	150.40
ENSRNOT00000018293	Lancl1	ENSRNOT00000018293.1	ENSRNOT00000018293.0	0.43	0.62	0.19	-2.78	0.64	-2.14	3.45E-32	2211-11-01	9680.51	110.00	77.68
ENSRNOT00000021671	Parva	ENSRNOT00000021671.3	ENSRNOT00000021671.6	0.17	0.21	0.04	-2.63	-1.90	-4.52	8.70E-158	2250.30	53396.77	407.98	1475.05
ENSRNOT00000028028	Sdhaf2	ENSRNOT00000028028.1	ENSRNOT00000028028.4	0.16	0.32	0.15	-1.33	-1.13	-2.46	2.96E-23	1358.38	7489.19	133.03	213.03
ENSRNOT00000056024	Svip	ENSRNOT00000056024.2	ENSRNOT00000056024.4	0.80	0.96	0.16	-7.48	2022-09-05	-2.39	0.00E+00	1356.87	7097.27	874.55	35.35
ENSRNOT00000036092	Zdhhc2	ENSRNOT00000036092.1	ENSRNOT00000036092.3	0.52	0.67	0.15	-3.62	2022-05-01	-2.57	1.61E-145	2203.84	12782.02	351.31	189.80
ENSRNOT00000050919	Aldh5a1	ENSRNOT00000050919.2	ENSRNOT00000050919.4	0.62	0.67	0.05	-5.44	1.18	-4.25	9.75E-47	35.15	717.78	89.80	80.61
ENSRNOT00000061011	Iws1	ENSRNOT00000061011.0	ENSRNOT00000061011.6	0.48	0.66	0.17	-4.36	2022-10-02	-2.27	1.45E-61	1084.34	5248.59	115.96	24.24
ENSRNOT00000017379	Naa15	ENSRNOT00000017379.1	ENSRNOT00000017379.5	0.87	0.97	0.10	-6.86	3.66	-3.20	4.38E-174	391.82	3609.19	212.12	13.13
ENSRNOT00000020722	Pole3	ENSRNOT00000020722.1	ENSRNOT00000020722.3	0.81	0.98	0.17	-7.61	5.31	-2.31	3.48E-177	477.88	2412.73	271.92	5.96
ENSRNOT00000005286	Nap1l1	ENSRNOT00000005286.1	ENSRNOT00000005286.3	0.44	0.55	0.11	-3.26	0.28	-2.98	1.03E-193	1978.89	15630.20	467.98	385.56
ENSRNOT00000067135	Rgl1	ENSRNOT00000067135.1	ENSRNOT00000067135.3	0.80	0.95	0.15	-6.39	3.89	-2.50	2.08E-37	90.71	510.00	57.58	2022-03-03
ENSRNOT00000020608	Rufy3	ENSRNOT00000020608.0	ENSRNOT00000020608.5	0.55	0.64	0.09	-4.21	0.86	-3.35	0.00E+00	6525.76	66717.58	1612.02	973.33
ENSRNOT00000044662	Lgals8	ENSRNOT00000044662.1	ENSRNOT00000044662.2	0.40	0.51	0.11	-3.22	0.24	-2.98	5.27E-26	586.57	4616.46	128.08	263.33
ENSRNOT00000014604	Braf	ENSRNOT00000014604.0	ENSRNOT00000014604.5	0.81	0.85	0.04	-7.78	3.24	-4.54	7.20E-184	119.19	2778.89	180.71	20.00
ENSRNOT00000014124	Tmod2	ENSRNOT00000014124.0	ENSRNOT00000014124.8	0.66	0.76	0.10	-5.57	2.31	-3.26	3.22E-126	238.79	2248.69	189.09	40.00
ENSRNOT00000039997	Pcnp	ENSRNOT00000039997.2	ENSRNOT00000039997.5	0.36	0.52	0.16	-2.58	0.14	-2.44	2.46E-44	692.42	3770.40	215.76	267.58
ENSRNOT00000008030	Nsg1	ENSRNOT00000008030.1	ENSRNOT00000008030.4	0.37	0.47	0.10	-3.03	-0.18	-3.21	0.00E+00	7083.13	66138.28	1204.95	1031.52
ENSRNOT00000051594	Znrf2	ENSRNOT00000051594.2	ENSRNOT00000051594.3	0.25	0.42	0.18	-1.73	-0.48	-2.21	2.03E-12	1922.83	8834.75	54.55	60.51
ENSRNOT00000041548	Rbms3	ENSRNOT00000041548.2	ENSRNOT00000041548.3	0.34	0.39	0.05	-3.29	-1.01	-4.30	1.24E-49	302.83	6555.25	115.96	309.60
ENSRNOT00000065229	39692	ENSRNOT00000065229.1	ENSRNOT00000065229.5	0.31	0.50	0.19	-2.13	0.00	-2.13	3.92E-180	2132.93	9332.42	558.48	288.28
ENSRNOT00000018190	Rala	ENSRNOT00000018190.0	ENSRNOT00000018190.3	0.24	0.36	0.12	-1.79	-1.06	-2.85	5.19E-15	2306.67	16576.36	61.31	105.76
ENSRNOT00000057138	Mto1	ENSRNOT00000057138.2	ENSRNOT00000057138.6	0.35	0.50	0.15	-2.46	-0.01	-2.48	9.54E-42	1034.85	5666-06-01	288.48	486.97
ENSRNOT00000043365	Pigx	ENSRNOT00000043365.0	ENSRNOT00000043365.4	0.83	0.92	0.09	-6.65	3.26	-3.38	1.77E-29	53.54	562.02	34.24	2022-02-02
ENSRNOT00000001417	Rac1	ENSRNOT00000001417.0	ENSRNOT00000001417.3	0.23	0.39	0.16	-1.35	-1.03	-2.38	6.87E-46	2600.00	13510.20	178.69	185.45
ENSRNOT00000004010	Mapk9	ENSRNOT00000004010.1	ENSRNOT00000004010.10	0.15	0.18	0.03	-2.71	-2.23	-4.94	1.17E-18	658.59	20189.90	42.42	189.70
ENSRNOT00000019921	Rnf152	ENSRNOT00000019921.2	ENSRNOT00000019921.6	0.67	0.69	0.02	-7.34	1.21	-6.13	6.44E-41	39.19	2971-01-01	31.31	18.18
ENSRNOT00000042095	LOC100912059	ENSRNOT00000042095.2	ENSRNOT00000042095.5	0.83	0.96	0.14	-6.32	3.67	-2.64	2.06E-48	91.31	573.23	75.45	2022-05-05
ENSRNOT00000016098	LOC100912059	ENSRNOT00000016098.2	ENSRNOT00000016098.5	0.83	0.96	0.13	-6.34	3.67	-2.67	8.42E-49	90.30	577.17	75.45	2022-05-05
ENSRNOT00000013620	Mturn	ENSRNOT00000013620.1	ENSRNOT00000013620.5	0.22	0.42	0.20	-1.54	-0.46	-2.00	4.84E-49	3186.87	12850.40	300.51	345.15
ENSRNOT00000024400	Ppp6r1	ENSRNOT00000024400.1	ENSRNOT00000024400.2	0.23	0.28	0.05	-2.86	-1.30	-4.16	2.06E-27	299.70	5369.29	66.36	161.62
ENSRNOT00000004010	Mapk9	ENSRNOT00000004010.1	ENSRNOT00000004010.8	0.23	0.26	0.03	-3.36	-1.66	-5.02	1.16E-24	658.59	21307.17	42.42	130.30
ENSRNOT00000005293	Map2k4	ENSRNOT00000005293.2	ENSRNOT00000005293.4	0.65	0.71	0.06	-5.65	1.78	-3.87	0.00E+00	3596.46	52497.98	862.53	441.62
ENSRNOT00000067135	Rgl1	ENSRNOT00000067135.1	ENSRNOT00000067135.4	0.82	0.97	0.15	-6.66	2022-10-04	-2.56	1.96E-39	90.71	531.92	57.58	2022-02-02
ENSRNOT00000003472	Parm1	ENSRNOT00000003472.0	ENSRNOT00000003472.5	0.32	0.34	0.02	-4.58	-0.98	-5.56	3.30E-55	238.38	11287.98	70.71	166.67
ENSRNOT00000071133	Gng2	ENSRNOT00000071133.2	ENSRNOT00000071133.5	0.33	0.39	0.06	-3.36	-0.67	-4.03	0.00E+00	5801.52	94891.62	1467.37	2320.40
ENSRNOT00000025980	Hnrnpk	ENSRNOT00000025980.0	ENSRNOT00000025980.3	0.22	0.37	0.15	-1.60	-0.91	-2.52	1.13E-78	11295.76	64659.80	380.20	553.74
ENSRNOT00000017379	Naa15	ENSRNOT00000017379.1	ENSRNOT00000017379.6	0.71	0.78	0.08	-5.59	2.00	-3.58	1.67E-181	391.82	4707-07-01	212.12	27.17
ENSRNOT00000022366	Tmem167a	ENSRNOT00000022366.1	ENSRNOT00000022366.3	0.24	0.40	0.16	-1.71	-0.64	-2.35	2.12E-19	2269.49	11536.36	114.14	175.45
ENSRNOT00000001779	Gnaz	ENSRNOT00000001779.2	ENSRNOT00000001779.6	0.48	0.62	0.15	-3.39	0.87	-2.52	4.08E-10	675.25	3864.24	2022-07-27	2022-02-22
ENSRNOT00000014604	Braf	ENSRNOT00000014604.0	ENSRNOT00000014604.3	0.45	0.54	0.08	-4.77	1.32	-3.45	3.78E-26	119.19	1305.35	180.71	501.82
ENSRNOT00000025925	St13	ENSRNOT00000025925.1	ENSRNOT00000025925.6	0.70	0.83	0.14	-5.04	2.37	-2.67	2.04E-210	2827.58	17886.26	364.14	96.97
ENSRNOT00000068033	Cbx6	ENSRNOT00000068033.0	ENSRNOT00000068033.4	0.18	0.38	0.20	-1.11	-0.90	-2.02	1.93E-19	12465.66	50045.66	204.75	349.70
ENSRNOT00000014124	Tmod2	ENSRNOT00000014124.0	ENSRNOT00000014124.5	0.55	0.72	0.17	-5.72	3.42	-2.30	1.36E-74	238.79	1153.94	189.09	55.56
ENSRNOT00000014124	Tmod2	ENSRNOT00000014124.0	ENSRNOT00000014124.9	0.49	0.55	0.06	-4.49	0.36	-4.13	4.47E-124	238.79	4124.44	189.09	135.56
ENSRNOT00000030221	AABR06055804.1	ENSRNOT00000030221.0	ENSRNOT00000030221.8	0.42	0.52	0.10	-3.31	0.14	-3.17	3.12E-211	2661.21	23758.59	450.61	365.56
ENSRNOT00000052392	Cadm1	ENSRNOT00000052392.2	ENSRNOT00000052392.5	0.55	0.74	0.19	-3.73	1.64	-2.09	4.35E-260	3918.59	16406.87	631.21	193.43
ENSRNOT00000058134	Eif2s3y	ENSRNOT00000058134.1	ENSRNOT00000058134.3	0.38	0.57	0.18	-3.07	0.93	-2.14	3.00E-74	2924.44	12883.54	185.15	72.73
ENSRNOT00000024366	Coa5	ENSRNOT00000024366.2	ENSRNOT00000024366.6	0.62	0.70	0.08	-5.01	1.48	-3.54	0.00E+00	1281.92	14795.35	1924-04-01	862.42
ENSRNOT00000014124	Tmod2	ENSRNOT00000014124.0	ENSRNOT00000014124.3	0.76	0.92	0.16	-6.68	4.24	-2.44	1.50E-115	238.79	1278.48	189.09	2022-09-09
ENSRNOT00000003473	Sap30l	ENSRNOT00000003473.2	ENSRNOT00000003473.5	0.73	0.84	0.11	-6.00	2.99	-3.01	9.67E-168	1300.40	10526.36	236.67	46.46
ENSRNOT00000019921	Rnf152	ENSRNOT00000019921.2	ENSRNOT00000019921.5	0.85	1.00	0.15	-6.64	2022-06-04	-2.58	3.28E-23	39.19	251.62	31.31	0.00
Table S19 : Candidate axonal remodeling in NT-3. Columns represent: 1- Ensembl Rn5 transcript ID, 2- Rat Rn5 gene symbol, 3- promoter-proximal (Ip) 3’ UTR isoform ID, 4- promoter-distall (Id) 3’ UTR isoform ID, 5- difference in relative promoter-proximal usage between axons and cell bodies in NT-3, 6- relative promoter-proximal usage in NT-3 axons, 7- relative promoter-proximal usage in NNT-3GF c…
