# Supplementary material for: The predicted RNA-binding protein regulome of axonal mRNAs
Source: HighWire-hosted journal article supplement (doi:10.1101/gr.277804.123), 2023-08-15
Supplement: Supplemental_Tables.zip [file Supplemental Table S20.xlsx]

## Sheet: Sheet1
Clip	distance from proximal 3' end [start]	distance from proximal 3' end [end]	Fisher enrichment P-value (-log10)	10 unique to NGF		RBP	Rn5	Condensate_Zscore	logFC_deg_cb	PVal_deg_cb	diff.transport	transport.ngf	transport.nt3	cb.ngf	cb.nt3	axons.ngf	axons.nt3
PTBP1_2_HepG2	0	50	5.523371	RISC complex		PTBP1	Ptbp1	2.36	1.42	1.42E+00	-0.65	1.15	1.80	8.26	9.86	2022-05-05	6.26
HNRNPL_iClip	50	100	4.700599	mRNA splicing		HNRNPL	HNRNPL	2.79	0.26	2.64E-01	-1.16	-0.52	0.64	5.87	2022-04-06	0.00	1.59
RBM22_1_K652	0	50	4.680977	mRNA transport		RBM22	Rbm22	2.42	-0.09	-8.93E-02	1.13	0.61	-0.52	9.71	9.76	2022-01-05	2.21
SMNDC1_1_HepG2	0	50	4.508111			SMNDC1	Smndc1	1.86	0.02	1.83E-02	2022-02-01	0.45	-0.58	9.16	9.34	3.92	1.88
TARDBP_2_K652	0	50	4.423801			TARDBP	Tardbp	2.87	0.09	8.93E-02	-1.55	-1.03	0.52	8.81	2022-08-09	0.00	4.00
U2AF2_1_HepG2	0	50	4.180338			U2AF2	U2af2	2.40	0.01	7.72E-03	-1.09	-0.37	0.72	2022-02-12	12.20	2022-08-07	8.23
DROSHA_2_K652	100	150	4.112384			DROSHA	Drosha	2.31	NA	NA	NA	NA	NA	NA	NA	NA	NA
EIF4E_iClip	50	100	3.820277			EIF4E	EIF4E	NA	-0.23	-2.31E-01	1.26	0.78	-0.47	12.44	12.51	8.31	5.41
RPS11_2_K652	0	50	3.800163			RPS11	Rps11	2.54	0.43	4.28E-01	-0.24	2022-01-02	2.24	2022-05-11	11.64	12.39	12.17
HNRNPA1_1_K652	50	100	3.559106			HNRNPA1	Hnrnpa1	3.83	-0.05	-5.01E-02	-0.33	-0.79	-0.46	10.38	10.44	2.86	3.46
FTO_1_K652	50	100	3.463773			FTO	Fto	0.15	0.28	2.81E-01	0.98	0.50	-0.49	9.54	9.89	3.98	2022-01-02
FASTKD2_1_HepG2	0	50	3.446705			FASTKD2	Fastkd2	1.64	0.20	1.96E-01	-2.19	-0.52	1.67	5.47	5.81	0.00	2.42
TBRG4_2_K652	0	50	3.311395			TBRG4	Tbrg4	1.41	0.39	3.91E-01	1.61	0.81	-0.80	8.27	2022-02-09	4.20	1.30
CPSF6_1_K652	0	50	3.304055			CPSF6	Cpsf6	2.89	0.04	4.42E-02	2.42	2022-08-02	-0.35	7.74	2022-12-08	4.77	1.91
TAF15_2_HepG2	0	50	3.162465			TAF15	Taf15	4.22	-0.03	-2.72E-02	0.25	1.41	1.17	2022-01-09	2022-08-09	6.59	5.17
U2AF2_1_K652	0	50	3.042663			U2AF2	U2af2	2.40	0.01	7.72E-03	-1.09	-0.37	0.72	2022-02-12	12.20	2022-08-07	8.23
EIF3D_1_HepG2	-50	0	2.959374			EIF3D	Eif3d	2.16	-0.17	-1.68E-01	-0.66	0.52	1.19	9.87	9.81	4.22	5.21
GPKOW_2_K652	100	150	2.938073			GPKOW	Gpkow	1.91	-0.20	-1.99E-01	1.99	0.45	-1.54	11.14	2022-06-11	2022-02-06	1.79
DDX3X_1_K652	0	50	2.904199			DDX3X	Ddx3x	2.49	-0.32	-3.17E-01	-1.17	-0.71	0.46	2022-01-14	13.89	7.63	7.42
TRA2A_2_HepG2	-200	-150	2.838466			TRA2A	Tra2a	2022-05-03	0.31	3.07E-01	0.80	1.63	0.83	11.62	2022-07-12	2022-09-09	7.61
GRWD1_2_HepG2	-250	-200	2.797487			GRWD1	Grwd1	1.90	0.48	4.78E-01	0.23	-0.63	-0.86	9.50	2022-04-10	1.80	2022-01-02
NCBP2_1_HepG2	100	150	2.748226			NCBP2	Ncbp2	2.42	0.13	1.29E-01	0.98	-0.72	-1.69	11.75	2022-04-12	5.75	4.55
RBFOX2_2_HepG2	-50	0	2.740073			RBFOX2	Rbfox2	2.59	-0.24	-2.44E-01	-1.31	-0.77	0.54	7.69	7.58	0.00	1.96
LIN28B_2_HepG2	100	150	2.724370			LIN28B	Lin28b	2.17	0.24	2.40E-01	-0.10	-0.81	-0.71	8.38	8.83	2022-01-01	1.17
SUGP2_1_HepG2	0	50	2.692622			SUGP2	Sugp2	2.23	0.18	1.81E-01	-2.10	-0.36	1.75	10.37	10.72	3.78	6.40
IGF2BP1_2_K652	0	50	2.689000			IGF2BP1	Igf2bp1	2.29	NA	NA	NA	NA	NA	NA	NA	NA	NA
ELAVL1_iClip	100	150	2.687073			ELAVL1	Elavl1	2.45	0.33	3.28E-01	2.17	1.66	-0.51	5.56	5.94	2.68	0.00
IGF2BP1_1_K652	100	150	2.678875			IGF2BP1	Igf2bp1	2.29	NA	NA	NA	NA	NA	NA	NA	NA	NA
HNRNPUL1_1_HepG2	100	150	2.668428			HNRNPUL1	Hnrnpul1	2.97	0.09	9.27E-02	0.87	0.34	-0.53	8.21	8.76	2.41	1.17
DDX3X_2_K652	0	50	2.622819			DDX3X	Ddx3x	2.49	-0.32	-3.17E-01	-1.17	-0.71	0.46	2022-01-14	13.89	7.63	7.42
PCBP2_2_HepG2	50	100	2.553947			PCBP2	Pcbp2	2.66	-0.12	-1.19E-01	1.71	2022-11-01	-0.60	9.51	9.19	6.43	1.95
HLTF_2_K652	-150	-100	2.515135			HLTF	Hltf	1.81	-0.34	-3.44E-01	-0.10	-0.47	-0.36	8.78	8.53	1.51	1.66
DGCR8_2_K652	-200	-150	2.491981			DGCR8	Dgcr8	2022-05-02	0.05	4.78E-02	1.66	0.84	-0.83	8.50	2022-07-09	4.17	1.17
SNRBP_iClip	-150	-100	2.473476			SNRBP	Snrpn	2.60	-0.19	-1.88E-01	1.80	0.87	-0.93	2022-08-09	2022-11-09	5.83	2022-01-01
HNRNPUL1_2_K652	0	50	2.452761			HNRNPUL1	Hnrnpul1	2.97	0.09	9.27E-02	0.87	0.34	-0.53	8.21	8.76	2.41	1.17
LIN28B_1_HepG2	0	50	2.365285			LIN28B	Lin28b	2.17	0.24	2.40E-01	-0.10	-0.81	-0.71	8.38	8.83	2022-01-01	1.17
SRSF7_1_K652	-50	0	2.362868			SRSF7	Srsf7	2.84	-0.08	-8.12E-02	-0.39	-1.44	-1.06	12.68	12.67	2022-02-04	4.51
CPSF6_2_K652	-200	-150	2.355480			CPSF6	Cpsf6	2.89	0.04	4.42E-02	2.42	2022-08-02	-0.35	7.74	2022-12-08	4.77	1.91
LIN28B_2_K652	100	150	2.331006			LIN28B	Lin28b	2.17	0.24	2.40E-01	-0.10	-0.81	-0.71	8.38	8.83	2022-01-01	1.17
U2AF2_2_K652	0	50	2.324622			U2AF2	U2af2	2.40	0.01	7.72E-03	-1.09	-0.37	0.72	2022-02-12	12.20	2022-08-07	8.23
SF3B1_1_K652	0	50	2.321090			SF3B1	Sf3b1	2.24	-0.16	-1.64E-01	-1.63	-0.45	1.18	7.28	6.38	2022-01-01	2.48
CELF2_iClip	50	100	2.285476			CELF2	CELF2	2.50	-0.35	-3.53E-01	-1.88	0.33	2.21	6.70	7.16	2022-01-01	4.37
SF3B4_1_K652	50	100	2.271335			SF3B4	Sf3b4	2.89	0.51	5.09E-01	1.89	0.52	-1.38	11.52	12.13	2022-11-07	3.89
SUPV3L1_1_HepG2	0	50	2.227051			SUPV3L1	Supv3l1	1.85	0.18	1.81E-01	-1.84	-0.99	0.84	2022-05-09	9.37	0.80	4.55
NSUN2_1_K652	0	50	2.208091			NSUN2	Nsun2	1.97	-0.31	-3.15E-01	-1.05	-0.40	0.64	12.27	12.23	5.91	6.88
TRA2A_1_HepG2	-200	-150	2.184280			TRA2A	Tra2a	2022-05-03	0.31	3.07E-01	0.80	1.63	0.83	11.62	2022-07-12	2022-09-09	7.61
SRSF1_2_K652	0	50	2.167430			SRSF1	Srsf1	2.96	-0.47	-4.74E-01	-2.00	0.37	2.38	11.41	10.69	5.73	2022-09-07
KHDRBS1_2_K652	50	100	2.112593			KHDRBS1	Khdrbs1	2.79	-0.32	-3.17E-01	-1.81	-0.80	2022-01-01	9.13	8.92	1.30	3.85
QKI_1_K652	100	150	2.102271			QKI	Qk	2022-12-02	NA	NA	NA	NA	NA	NA	NA	NA	NA
LARP4_1_K652	0	50	2.100294			LARP4	Larp4b	2.49	-0.23	-2.25E-01	1.13	0.56	-0.57	10.84	10.24	5.25	2.42
PTBP1_2_K652	-200	-150	2.098034			PTBP1	Ptbp1	2.36	1.42	1.42E+00	-0.65	1.15	1.80	8.26	9.86	2022-05-05	6.26
PTBP1_1_K652	0	50	2.096171			PTBP1	Ptbp1	2.36	1.42	1.42E+00	-0.65	1.15	1.80	8.26	9.86	2022-05-05	6.26
SUB1_1_HepG2	0	50	2.094035			SUB1	Sub1	-0.27	-0.08	-7.79E-02	1.97	2.55	0.58	12.75	12.78	10.39	6.72
PPIL4_1_K652	100	150	2.031880			PPIL4	Ppil4	2022-08-02	-0.06	-6.22E-02	1.28	0.74	-0.54	4.96	5.30	2022-01-01	0.00
RPS11_1_K652	-200	-150	2.010903			RPS11	Rps11	2.54	0.43	4.28E-01	-0.24	2022-01-02	2.24	2022-05-11	11.64	12.39	12.17
Table S20 : NGF RBP regulators of axonal remodeling. Columns content: 1- CLIP experiment ID, 2- position (start) relative to the promoter-proximal (Ip) 3' end where RBP is most significantly enriched in predicted remodelled 3’ UTR isoforms in NGF condition, 3- position (end) relative to the promoter-proximal (Ip) 3' end where RBP is most significantly enriched in predicted remodelled 3’ UTR isofo…
