# Supplementary material for: The predicted RNA-binding protein regulome of axonal mRNAs
Source: HighWire-hosted journal article supplement (doi:10.1101/gr.277804.123), 2023-08-15
Supplement: Supplemental_Tables.zip [file Supplemental Table S21.xlsx]

## Sheet: Sheet1
Clip	distance from proximal 3' end [start]	distance from proximal 3' end [end]	Fisher enrichment P-value (-log10)	16 unique to NT3 of which 8 are detected as binding to plasma RNA sequences (PMID:32876046)		RBPs	Rn5	Condensate_Zscore	logFC_deg_cb	PVal_deg_cb	diff.transport	transport.ngf	transport.nt3	cb.ngf	cb.nt3	axons.ngf	axons.nt3
TARDBP_1_K652	0	50	4.590239	RNA 3-UTR binding		TARDBP	Tardbp	2.87	0.09	8.93E-02	-1.55	-1.03	0.52	8.81	2022-08-09	0.00	4.00
RPS11_1_K652	-200	-150	3.915299	mRNA 3-end processing, and RNA recognition motif. (a.k.a. RRM, RBD, or RNP domain)		RPS11	Rps11	2.54	0.43	4.28E-01	-0.24	2022-01-02	2.24	2022-05-11	11.64	12.39	12.17
AKAP8L_2_K652	-200	-150	3.771028	mRNA Splicing - Major Pathway		AKAP8L	Akap8l	2.83	0.24	2.43E-01	-0.98	-0.43	0.55	7.14	7.53	0.99	1.97
TARDBP_2_K652	-200	-150	3.655005			TARDBP	Tardbp	2.87	0.09	8.93E-02	-1.55	-1.03	0.52	8.81	2022-08-09	0.00	4.00
HLTF_1_K652	-200	-150	3.568603			HLTF	Hltf	1.81	-0.34	-3.44E-01	-0.10	-0.47	-0.36	8.78	8.53	1.51	1.66
ELAVL1_iClip	0	50	3.258836			ELAVL1	Elavl1	2.45	0.33	3.28E-01	2.17	1.66	-0.51	5.56	5.94	2.68	0.00
DDX24_2_K652	-200	-150	3.170120			DDX24	Ddx24	1.94	0.12	1.18E-01	-0.80	-0.41	0.39	10.22	10.47	3.70	4.13
GEMIN5_2_K652	-200	-150	3.149973			GEMIN5	Gemin5	2022-02-02	0.23	2.26E-01	-1.07	-0.41	0.66	6.75	7.00	0.50	1.67
CELF4_iClip	0	50	3.058527			CELF4	CELF4	2022-05-02	-0.06	-6.05E-02	-1.13	-0.72	0.41	2022-09-11	11.63	4.41	5.85
LIN28B_2_K652	-50	0	3.055572			LIN28B	Lin28b	2.17	0.24	2.40E-01	-0.10	-0.81	-0.71	8.38	8.83	2022-01-01	1.17
YWHAG_1_K652	-200	-150	2.974458			YWHAG	Ywhag	1.82	0.21	2.15E-01	1.38	0.41	-0.97	16.68	2022-03-17	12.37	2022-11-11
TAF15_2_K652	-200	-150	2.878401			TAF15	Taf15	4.22	-0.03	-2.72E-02	0.25	1.41	1.17	2022-01-09	2022-08-09	6.59	5.17
PPIG_2_HepG2	-200	-150	2.832961			PPIG	Ppig	2.36	0.04	3.96E-02	-1.18	-0.35	0.83	8.46	8.35	2022-01-02	3.29
RBM22_2_K652	100	150	2.819100			RBM22	Rbm22	2.42	-0.09	-8.93E-02	1.13	0.61	-0.52	9.71	9.76	2022-01-05	2.21
SLBP_1_K652	0	50	2.805498			SLBP	Slbp	2.44	-0.79	-7.95E-01	-0.78	-1.38	-0.61	2022-05-11	10.38	2.71	2.93
PPIL4_1_K652	0	50	2.713997			PPIL4	Ppil4	2022-08-02	-0.06	-6.22E-02	1.28	0.74	-0.54	4.96	5.30	2022-01-01	0.00
YBX3_1_K652	100	150	2.706834			YBX3	Ybx3	2022-09-02	0.93	9.29E-01	-0.47	0.78	1.25	12.13	12.26	9.31	9.36
FASTKD2_1_HepG2	0	50	2.686078			FASTKD2	Fastkd2	1.64	0.20	1.96E-01	-2.19	-0.52	1.67	5.47	5.81	0.00	2.42
SF3B4_2_K652	100	150	2.641018			SF3B4	Sf3b4	2.89	0.51	5.09E-01	1.89	0.52	-1.38	11.52	12.13	2022-11-07	3.89
DROSHA_2_K652	100	150	2.606255			DROSHA	Drosha	2.31	NA	NA	NA	NA	NA	NA	NA	NA	NA
CSTF2T_1_K652	-50	0	2.602350			CSTF2T	Cstf2t	2.77	-0.39	-3.89E-01	-1.37	-1.68	-0.32	2022-02-11	10.79	1.88	3.40
SND1_2_K652	100	150	2.587500			SND1	Snd1	2022-12-02	-0.13	-1.33E-01	-0.99	-0.68	0.30	11.32	11.18	3.99	4.58
TRA2A_2_HepG2	-200	-150	2.585780			TRA2A	Tra2a	2022-05-03	0.31	3.07E-01	0.80	1.63	0.83	11.62	2022-07-12	2022-09-09	7.61
TAF15_1_HepG2	-50	0	2.574291			TAF15	Taf15	4.22	-0.03	-2.72E-02	0.25	1.41	1.17	2022-01-09	2022-08-09	6.59	5.17
HNRNPC_1_HepG2	0	50	2.563278			HNRNPC	HNRNPC	2.63	-0.25	-2.49E-01	1.66	0.45	-1.21	2022-09-13	2022-12-13	9.33	5.57
TBRG4_1_K652	-200	-150	2.539568			TBRG4	Tbrg4	1.41	0.39	3.91E-01	1.61	0.81	-0.80	8.27	2022-02-09	4.20	1.30
EIF4G2_2_K652	100	150	2.509716			EIF4G2	Eif4g2	2.13	-0.04	-4.08E-02	-0.23	0.36	0.58	15.35	15.42	10.35	2022-06-10
DDX3X_1_K652	0	50	2.493428			DDX3X	Ddx3x	2.49	-0.32	-3.17E-01	-1.17	-0.71	0.46	2022-01-14	13.89	7.63	7.42
DDX3X_2_K652	0	50	2.437710			DDX3X	Ddx3x	2.49	-0.32	-3.17E-01	-1.17	-0.71	0.46	2022-01-14	13.89	7.63	7.42
GNL3_2_K652	-100	-50	2.417557			GNL3	Gnl3	2022-01-02	-0.80	-7.98E-01	-0.99	-0.34	0.65	11.34	10.69	5.92	5.55
PUS1_1_K652	100	150	2.310797			PUS1	Pus1	2022-01-02	-0.06	-5.87E-02	0.04	0.47	0.43	8.35	8.48	2022-10-03	2.47
PPIG_1_HepG2	-200	-150	2.308652			PPIG	Ppig	2.36	0.04	3.96E-02	-1.18	-0.35	0.83	8.46	8.35	2022-01-02	3.29
GPKOW_1_K652	-250	-200	2.303067			GPKOW	Gpkow	1.91	-0.20	-1.99E-01	1.99	0.45	-1.54	11.14	2022-06-11	2022-02-06	1.79
XRCC6_1_K652	0	50	2.268215			XRCC6	Xrcc6	1.88	0.02	2.49E-02	0.94	0.48	-0.46	8.44	8.63	3.15	1.41
LARP4_2_HepG2	-50	0	2.261949			LARP4	Larp4b	2.49	-0.23	-2.25E-01	1.13	0.56	-0.57	10.84	10.24	5.25	2.42
CPSF6_1_K652	100	150	2.257802			CPSF6	Cpsf6	2.89	0.04	4.42E-02	2.42	2022-08-02	-0.35	7.74	2022-12-08	4.77	1.91
MTPAP_2_K652	-50	0	2.247118			MTPAP	Mtpap	1.73	-0.21	-2.09E-01	2022-12-01	0.61	-0.51	5.64	5.45	1.30	0.00
SUPV3L1_2_HepG2	0	50	2.202191			SUPV3L1	Supv3l1	1.85	0.18	1.81E-01	-1.84	-0.99	0.84	2022-05-09	9.37	0.80	4.55
UCHL5_2_HepG2	0	50	2.192055			UCHL5	Uchl5	1.89	-0.11	-1.11E-01	0.61	1.92	1.31	8.13	8.15	6.36	4.38
NCBP2_1_K652	0	50	2.184065			NCBP2	Ncbp2	2.42	0.13	1.29E-01	0.98	-0.72	-1.69	11.75	2022-04-12	5.75	4.55
AARS1_2_K652	0	50	2.176341			AARS1	AARS1	2022-08-02	0.27	2.71E-01	-0.70	0.33	2022-02-01	12.58	12.98	6.48	7.74
DHX30_2_K652	-200	-150	2.138569			DHX30	Dhx30	1.74	0.22	2.21E-01	1.51	1.16	-0.35	10.97	11.36	6.60	4.36
QKI_1_HepG2	0	50	2.118981			QKI	Qk	2022-12-02	NA	NA	NA	NA	NA	NA	NA	NA	NA
SRSF7_2_K652	-100	-50	2.104922			SRSF7	Srsf7	2.84	-0.08	-8.12E-02	-0.39	-1.44	-1.06	12.68	12.67	2022-02-04	4.51
SRSF7_1_K652	-50	0	2.096092			SRSF7	Srsf7	2.84	-0.08	-8.12E-02	-0.39	-1.44	-1.06	12.68	12.67	2022-02-04	4.51
TIA1_2_K652	-50	0	2.092564			TIA1	Tia1	2.79	0.23	2.34E-01	1.00	0.56	-0.45	2022-06-08	7.96	3.81	2022-01-01
AGGF1_2_K652	0	50	2.018461			AGGF1	Aggf1	-0.07	-0.10	-1.02E-01	0.09	0.45	0.37	10.25	10.30	2022-02-05	2022-04-04
HLTF_2_K652	-150	-100	2.014141			HLTF	Hltf	1.81	-0.34	-3.44E-01	-0.10	-0.47	-0.36	8.78	8.53	1.51	1.66
RBFOX2_2_K652	100	150	2.014141			RBFOX2	Rbfox2	2.59	-0.24	-2.44E-01	-1.31	-0.77	0.54	7.69	7.58	0.00	1.96
DHX30_1_K652	0	50	2.004538			DHX30	Dhx30	1.74	0.22	2.21E-01	1.51	1.16	-0.35	10.97	11.36	6.60	4.36
Table S21 : NT-3 RBP regulators of axonal remodeling. Columns content: 1- CLIP experiment ID, 2- position (start) relative to the promoter-proximal (Ip) 3' end where RBP is most significantly enriched in predicted remodelled 3’ UTR isoforms in NT-3 condition, 3- position (end) relative to the promoter-proximal (Ip) 3' end where RBP is most significantly enriched in predicted remodelled 3’ UTR iso…
