# Supplementary material for: The predicted RNA-binding protein regulome of axonal mRNAs
Source: HighWire-hosted journal article supplement (doi:10.1101/gr.277804.123), 2023-08-15
Supplement: Supplemental_Tables.zip [file Supplemental Table S22.xlsx]

## Sheet: Sheet1
Name	Model	df	AIC	anova(fit4.2,fit5.2,test="Chisq")	anova(fit4.2,fit5.2,test="Chisq")
fit4.2	axons~poly(cb,4)+log10(txL)	7	119534.8	Analysis of Variance Table	Analysis of Variance Table
fit5.2	axons~poly(cb,5)+log10(txL)	8	119536.7
fit3.2	axons~poly(cb,3)+log10(txL)	6	119543.6	Model 1: axons ~ poly(cb, 4) + txL	Model 1: axons ~ poly(cb, 4) + txL
fit2.2	axons~poly(cb,2)+log10(txL)	5	119776.2	Model 2: axons ~ poly(cb, 5) + txL	Model 2: axons ~ poly(cb, 4)
fit4.1	axons~poly(cb,4)	6	120743.0	Res.Df RSS Df Sum of Sq Pr(>Chi)	Res.Df RSS Df Sum of Sq Pr(>Chi)
fit5.1	axons~poly(cb,5)	7	120745.0	1 30444 90320	1 30444 90320
fit3.1	axons~poly(cb,3)	5	120754.1	2 30443 90320 1 0.044446 0.9026	2 30445 93982 -1 -3662 < 2.2e-16 ***
fit2.1	axons~poly(cb,2)	4	120975.6	---	---
fit1.2	axons~cb+log10(txL)	4	122413.4	Signif. codes: 0 ‘***’ 0.001 ‘**’ 0.01 ‘*’ 0.05 ‘.’ 0.1 ‘ ’ 1	Signif. codes: 0 ‘***’ 0.001 ‘**’ 0.01 ‘*’ 0.05 ‘.’ 0.1 ‘ ’ 1
fit1.1	axons~cb	3	123636.6
Table S22 : ANOVA linear model of axonal localisation. Columns content: 1- name of the linear model, 2- full description of the model, 3- degree of freedom, 4- AIC as obtained from ANOVA comparing all models, 5- analysis of variance table comparing models in NGF condition, 6- analysis of variance table comparing models in NT-3 condition.
